# Supplementary material
Source: PubMed Central journal article supplement (PMC3587680)

## Supplementary Material

### Synthesis of N3-Substituted Carboranyl Thymidine Bioconjugates and their Evaluation as Substrates of Recombinant Human Thymidine Kinase 1

Hitesh K. Agarwal,<sup>\*1</sup> Craig A. McElroy,<sup>1</sup> Elena Sjuvarsson,<sup>2</sup> Staffan Eriksson,<sup>2</sup> Michael  
V. Darby,<sup>1</sup> and Werner Tjarks<sup>\*1</sup>

<sup>a</sup>Division of Medicinal Chemistry and Pharmacognosy, The Ohio State University, 500 West 12<sup>th</sup> Avenue, Columbus, OH 43210.

<sup>b</sup>Department of Anatomy, Physiology and Biochemistry, Swedish University of Agricultural Sciences, 751 23 Uppsala, Sweden

\*Corresponding authors:

Hitesh K Agarwal: Division of Medicinal Chemistry & Pharmacognosy, The Ohio State University, 500 West 12<sup>th</sup> Avenue, Room 422, Columbus, OH 43210, USA; Tel.: +1-614-688-3149; E-mail address: [agarwal.111@osu.edu](mailto:agarwal.111@osu.edu)

Werner Tjarks: Division of Medicinal Chemistry & Pharmacognosy, The Ohio State University, 500 West 12<sup>th</sup> Avenue, Columbus, OH 43210, USA; Tel.: +1-614-292-7624; Fax: +1-614 292 2435; E-mail address: [tjarks.1@osu.edu](mailto:tjarks.1@osu.edu)

| <b>Table of Contents:</b>                                                                                                                                                                     | <b>Page</b> |
|-----------------------------------------------------------------------------------------------------------------------------------------------------------------------------------------------|-------------|
| 1. HPLC methods                                                                                                                                                                               | S3          |
| 2. High resolution mass spectra, <sup>1</sup> H-NMR- and <sup>13</sup> C NMR spectra,<br>and analytical HPLC traces in two different solvent systems                                          | S4-S121     |
| a. High resolution mass-, <sup>1</sup> H-NMR-, and <sup>13</sup> C NMR spectra of <b>2</b>                                                                                                    | S4-6        |
| b. High resolution mass spectra, <sup>1</sup> H-NMR- and <sup>13</sup> C NMR spectra,<br>and analytical HPLC traces of N3-amidine-type dThd analogues ( <b>3a-3f</b> )                        | S7-30       |
| c. High resolution mass-, FT-IR-, <sup>1</sup> H-NMR-, and <sup>13</sup> C NMR<br>spectra of <b>5</b>                                                                                         | S31-34      |
| d. High resolution mass-, <sup>1</sup> H-NMR-, and <sup>13</sup> C NMR spectra of<br>N3-guanidine-type dThd analogues ( <b>6a-6g</b> )                                                        | S35-53      |
| e. High resolution mass spectra, <sup>1</sup> H-NMR- and <sup>13</sup> C NMR spectra,<br>and analytical<br>HPLC traces of N3-guanidine-type dThd analogues ( <b>7a-7g</b> )                   | S54-81      |
| f. High resolution mass spectra, <sup>1</sup> H-NMR- and <sup>13</sup> C NMR spectra,<br>and analytical HPLC traces of N3-tetrazolymethyl-type dThd analogues<br>( <b>8, 9a, 9b1/2</b> )      | S82-93      |
| g. 1H-1H NOSEY NMR for 3-[1(2)- <i>closo</i> -1,7-Carboranylethyltetrazol-5-<br>ylmethyl]thymidine ( <b>9b1/2</b> ).                                                                          | S94         |
| h. High resolution mass spectra, <sup>1</sup> H-NMR- and <sup>13</sup> C NMR spectra,<br>and analytical HPLC traces of N3-tetrazolymethyl-type dThd analogues<br>( <b>9c1/2-9d1/2</b> )       | S95-102     |
| i. High resolution mass spectra, <sup>1</sup> H-NMR- and <sup>13</sup> C NMR spectra,<br>and analytical HPLC traces of N3-tetrazolyl-type dThd analogues<br>( <b>10, 11a, 11b1/2-11d1/2</b> ) | S103-122    |
| 3. Purification of hTK1 and determination of its concentration                                                                                                                                | S123        |
| 4. LR-ESI-MS for hTK1 enzyme assay of <b>7f</b> with <sup>31</sup> P-ATP                                                                                                                      | S124        |

## **1. HPLC methods.**

Preparative HPLC was performed with a Gemini 5 $\mu$  C18 column (21.20 mm x 250 mm, 5  $\mu$ m particle size) supplied by Phenomenex Inc. CA, USA on a Hitachi HPLC system (L-2130) with a Windows based data acquisition and a Hitachi Diode array detector (L-2455). Purification was accomplished using a water (0.1% trifluoroacetic acid)/methanol (0.1% trifluoroacetic acid) gradient at 7 mL/min flow rate (method: 100:0 to 50:50 over 70 min followed by 50:50 to 0:100 over 40 min).

**Table S1.** HPLC method used for the purification of the compounds.

| <b>Time<br/>(minutes)</b> | <b>Water<br/>Concentration<br/>A (%)</b> | <b>Acetonitrile<br/>Concentration<br/>B (%)</b> | <b>Flow rate<br/>(mL/min)</b> |
|---------------------------|------------------------------------------|-------------------------------------------------|-------------------------------|
| 0.00                      | 100.0                                    | 0.0                                             | 1.0                           |
| 1.0                       | 100.0                                    | 0.0                                             | 7.0                           |
| 70.0                      | 0.0                                      | 50.0                                            | 7.0                           |
| 110.0                     | 0.0                                      | 100.0                                           | 7.0                           |
| 119.0                     | 100.0                                    | 0.0                                             | 7.0                           |
| 120.0                     | 100.0                                    | 0.0                                             | 1.0                           |

Analytical HPLC was carried out with a Gemini 5 $\mu$  C18 110A Column (250 x 4.6 mm) supplied by Phenomenex Inc. CA, USA using the HPLC system above. Two different gradients [water (0.1% trifluoroacetic acid)/acetonitrile (0.1% trifluoroacetic acid) and water (0.1% trifluoroacetic acid)/methanol (0.1% trifluoroacetic acid)] were used at 1 mL/min flow rate (method: 100:0 to 75:25 over 20 min followed by 75:25 to 100:0 over 10 min).

**2. High resolution mass-,  $^1\text{H}$ -NMR-, and  $^{13}\text{C}$  NMR spectra and analytical HPLC traces in two different solvent systems**

**3-(Cyanomethyl)thymidine (2).  $^1\text{H}$  NMR**

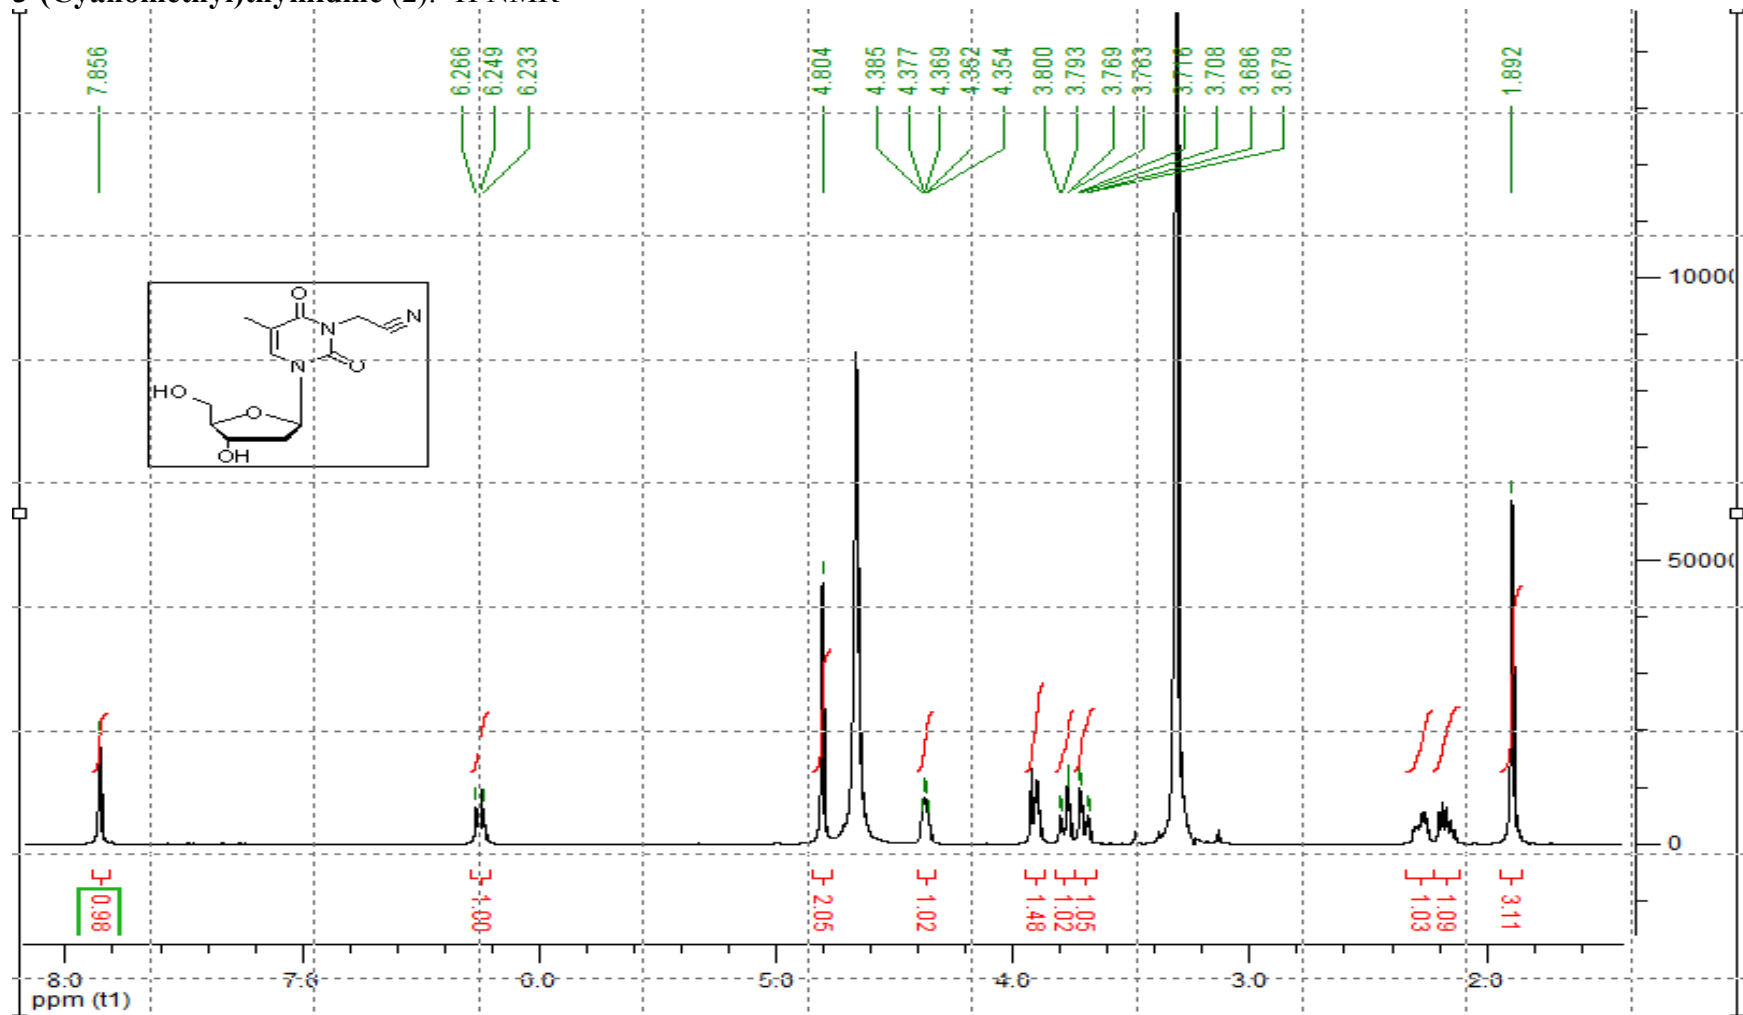

3-(Cyanomethyl)thymidine (2).  $^{13}\text{C}$  NMR

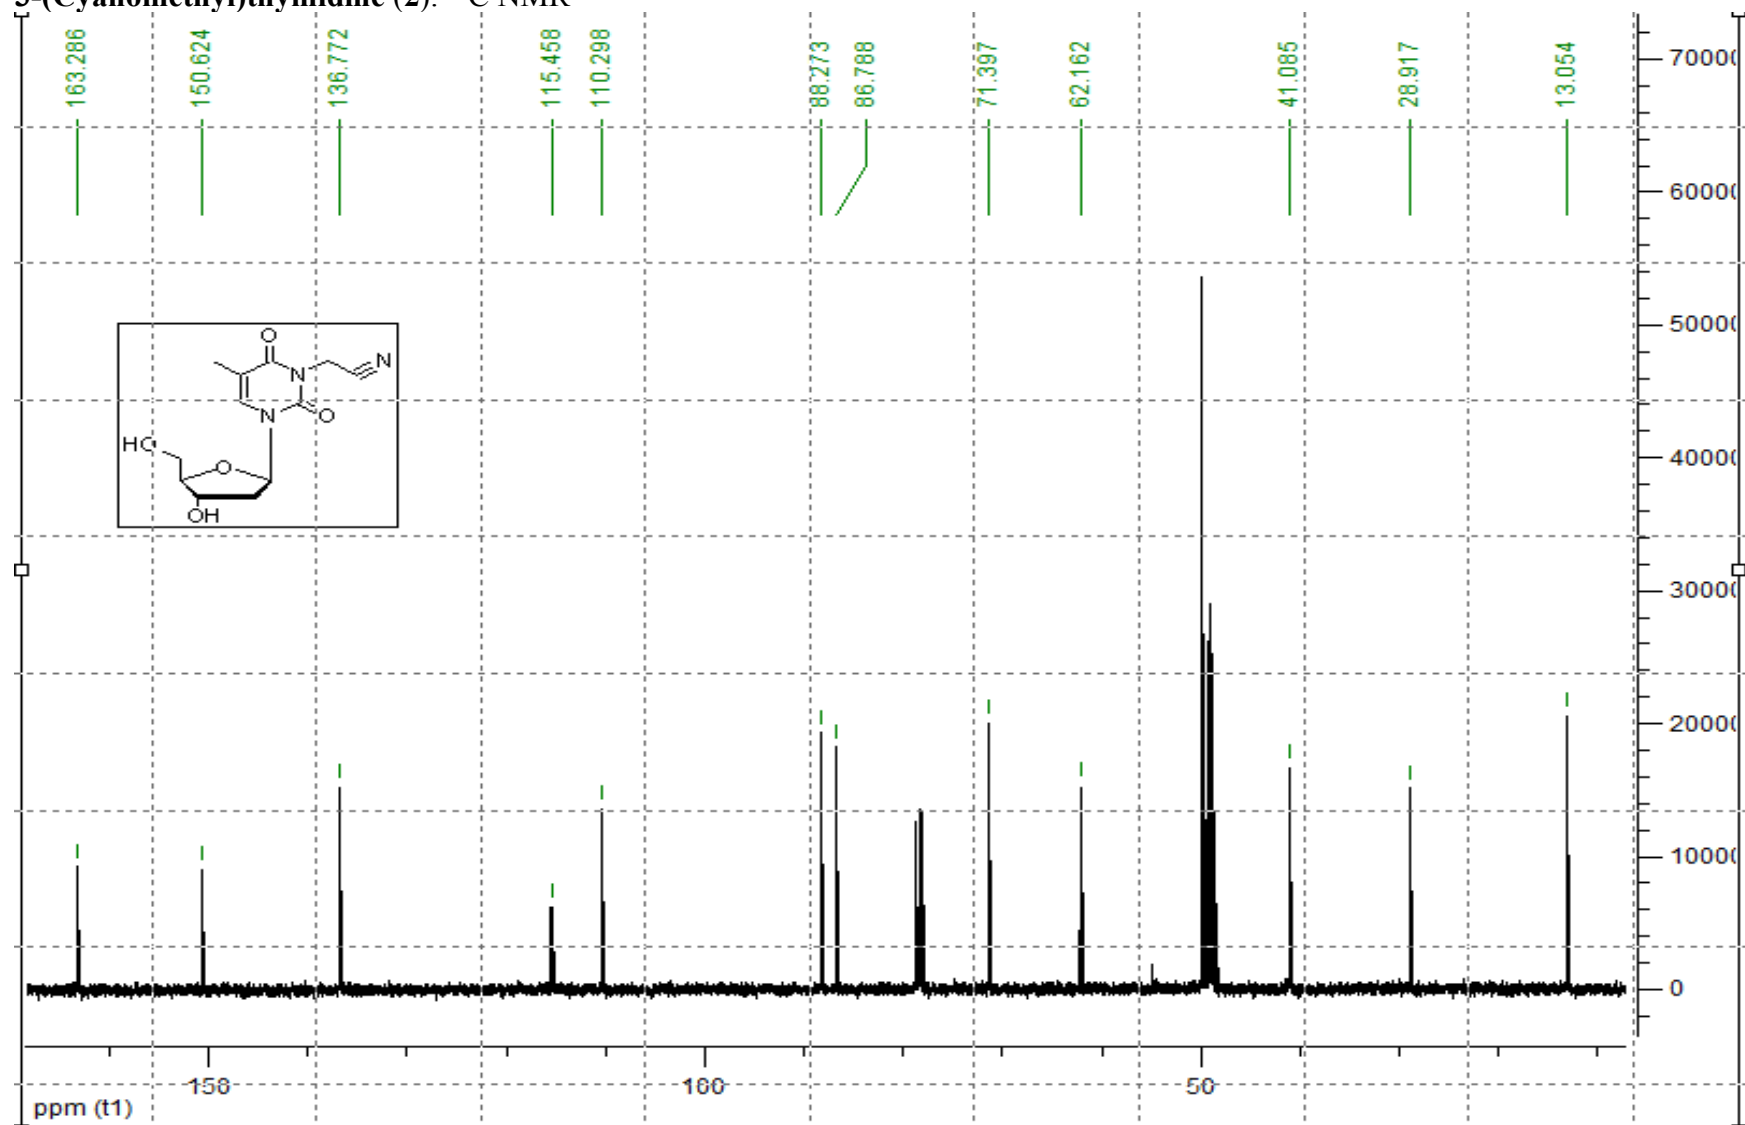

**3-(Cyanomethyl)thymidine (2).** HR-ESI-MS found: 304.0888.

L052909C 413 (7.593) AM (Cen,4, 80.00, Ar,0.0,0.00,1.00); Sm (SG, 2x3.00); Cm (359:425)

TOF MS ES+  
6.10e4

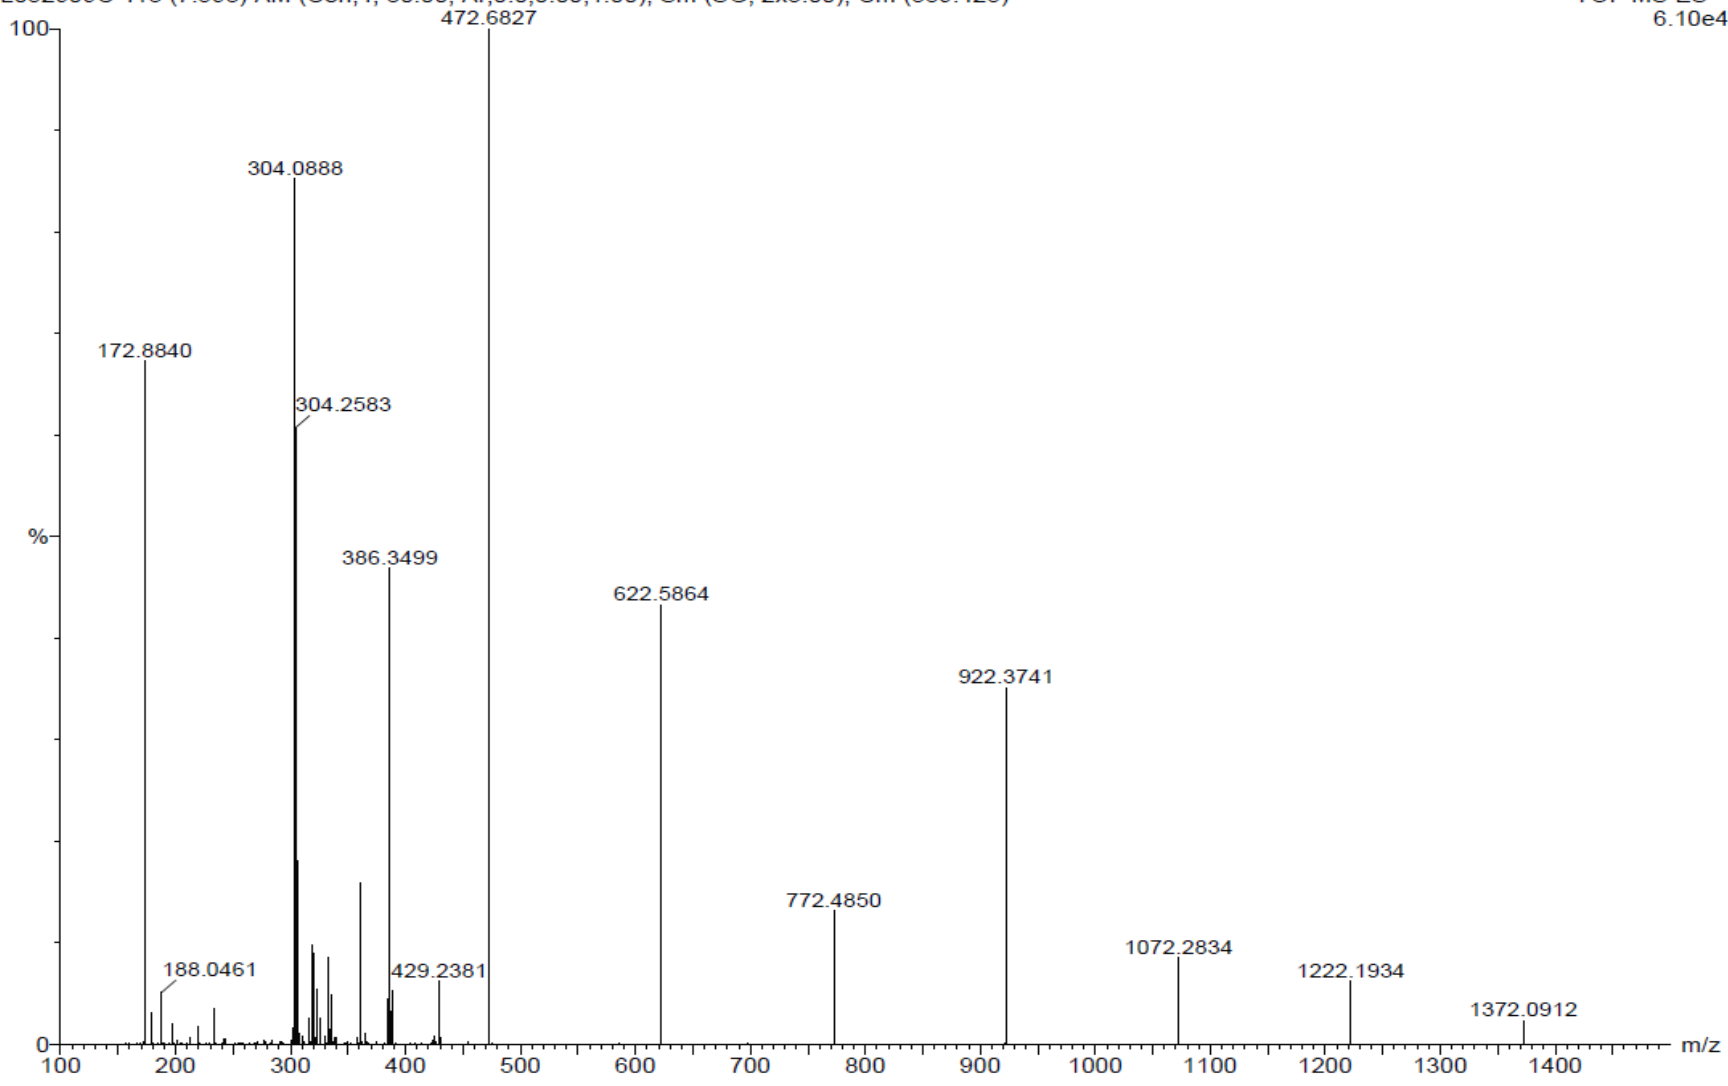

3-[2-Imino-2-(propylamino)ethyl]thymidine (3a). <sup>1</sup>H NMR

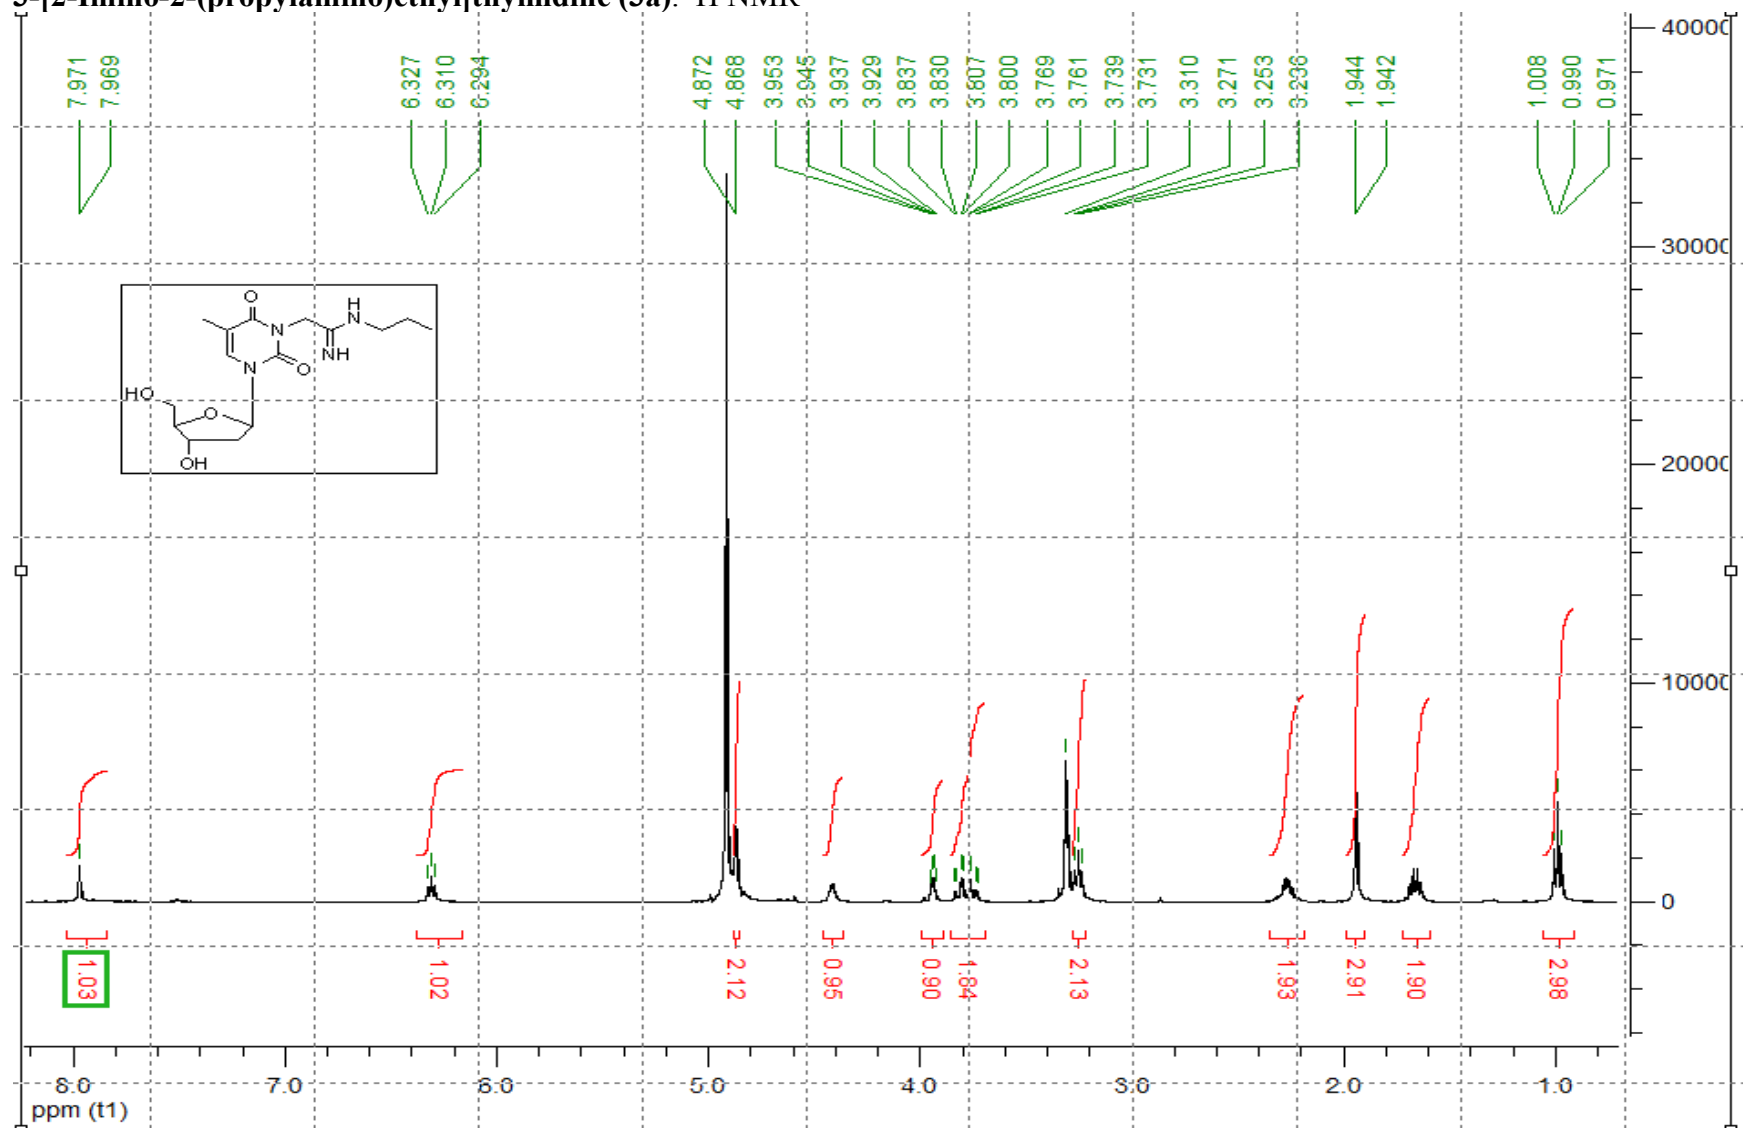

3-[2-Imino-2-(propylamino)ethyl]thymidine (3a). <sup>13</sup>C NMR

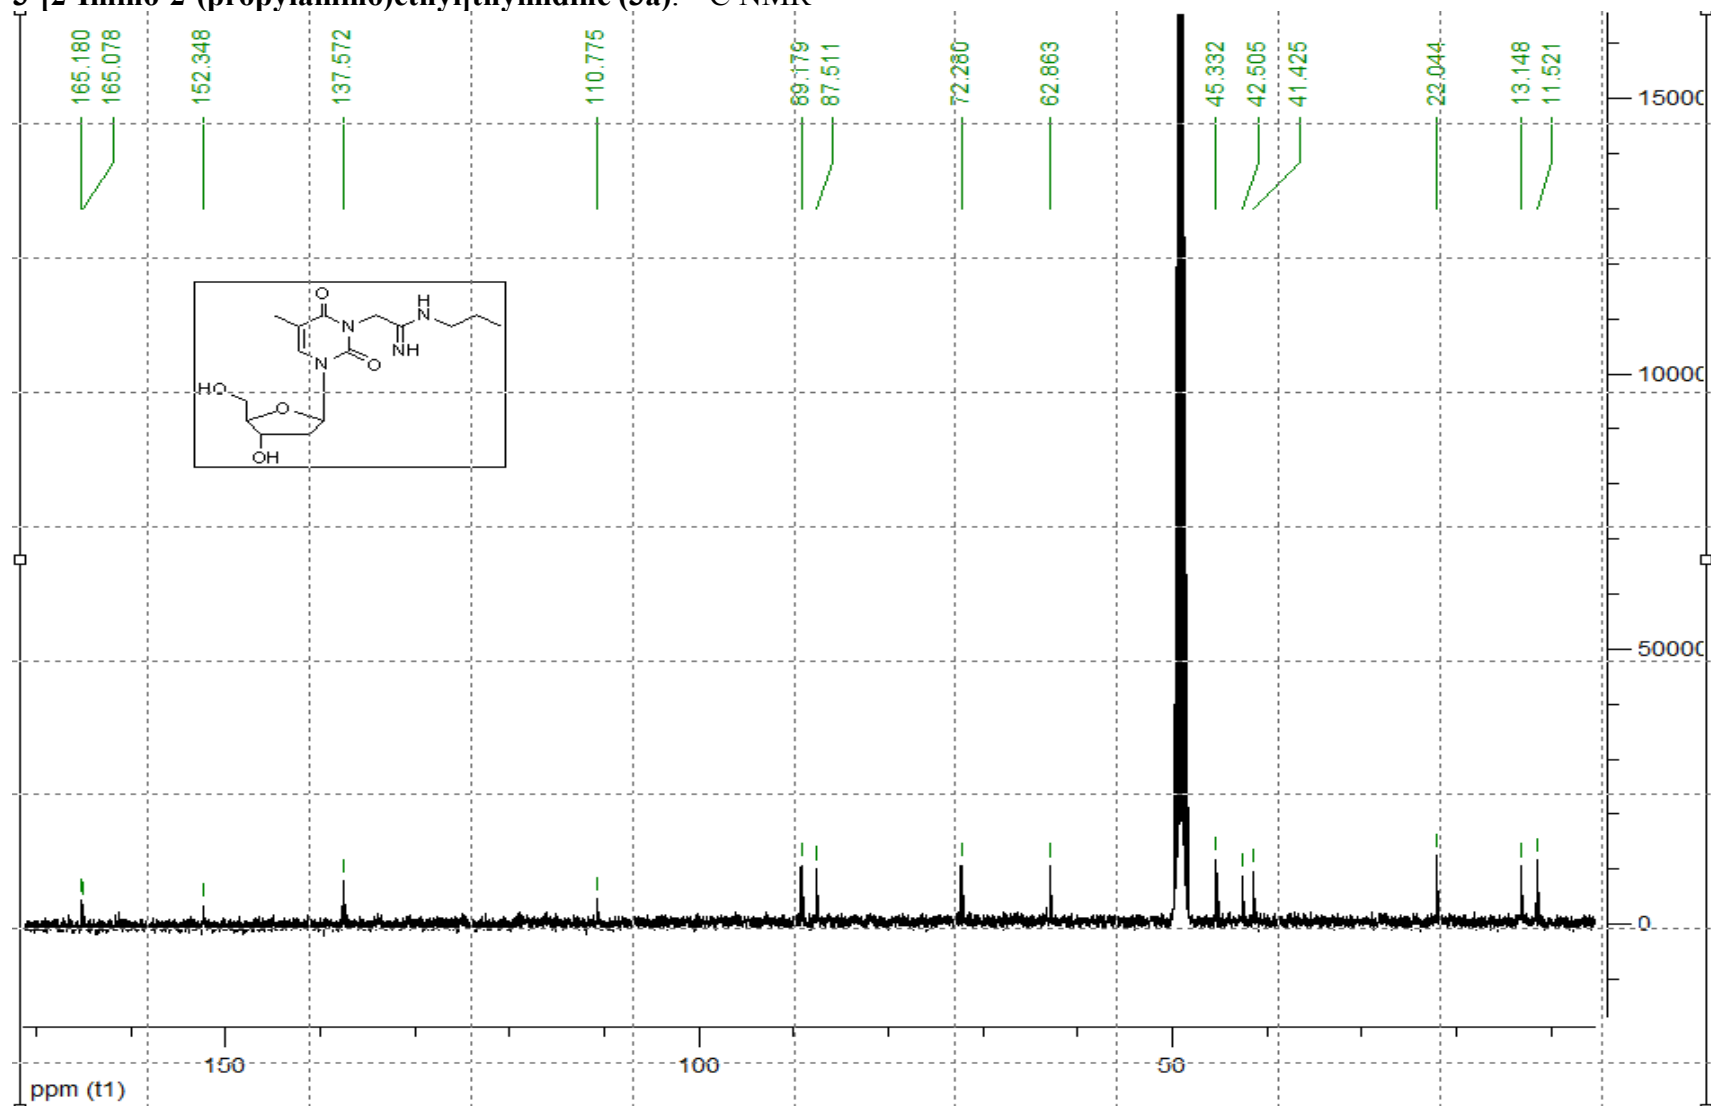



**3-[2-Imino-2-(propylamino)ethyl]thymidine (3a).** HR-ESI-MS found: 341.1799.

L070209F 107 (1.962) ÅM (Cen,4, 80.00, Ar,0.0,0.00,1.00); Sm (SG, 2x3.00); Cm (107)

TOF MS ES+

1.93e3

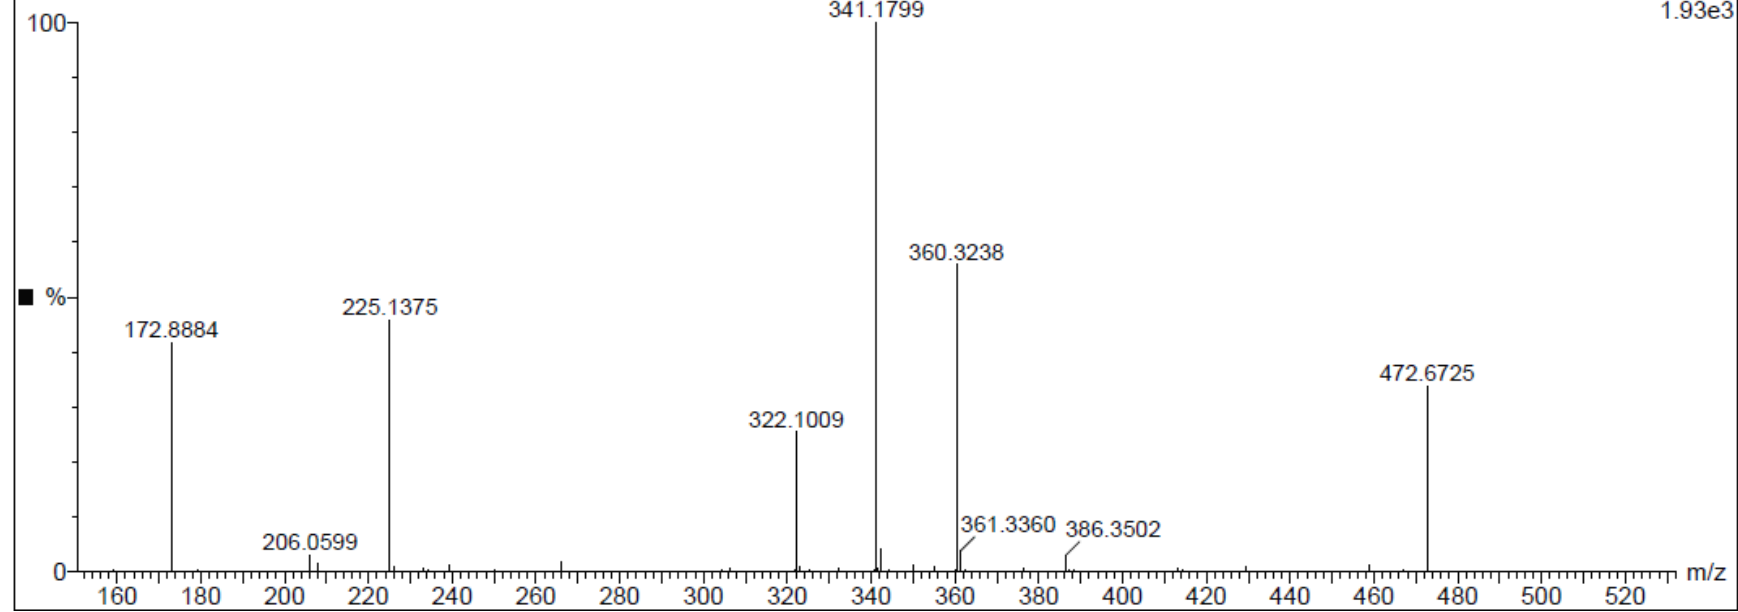

**3-[2-Imino-2-(propylamino)ethyl]thymidine (3a).** Analytical traces in Water:Acetonitrile gradient

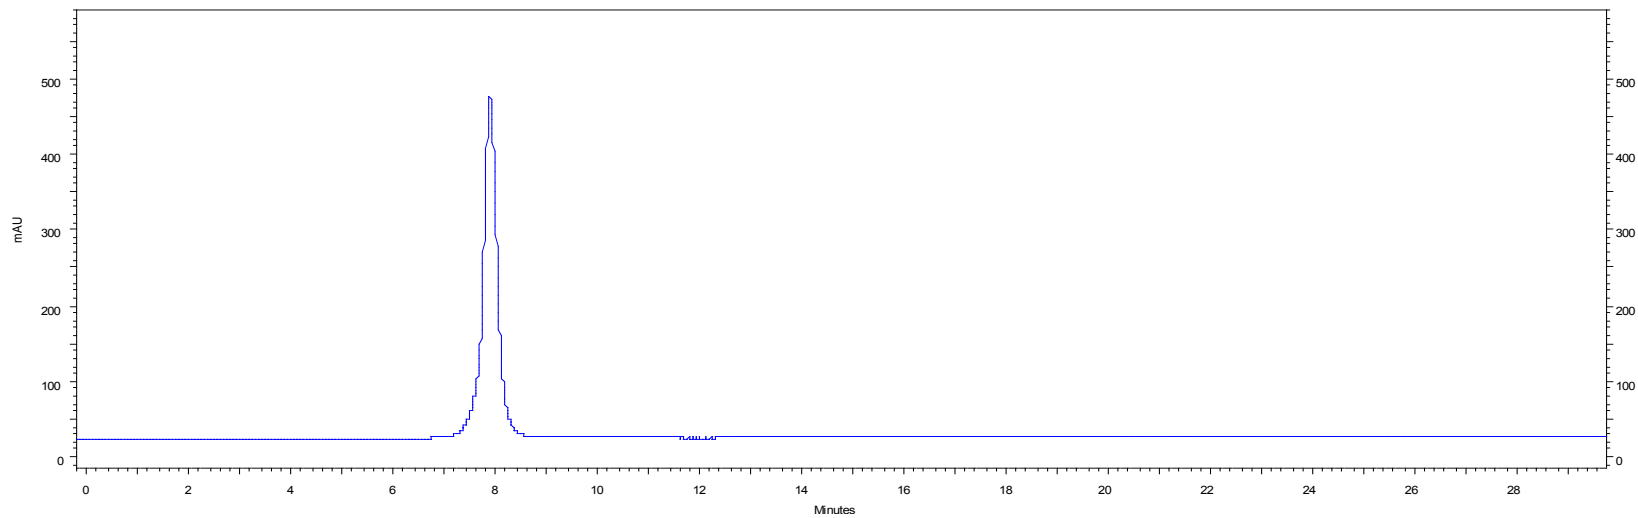

Analytical traces in Water:Methanol gradient

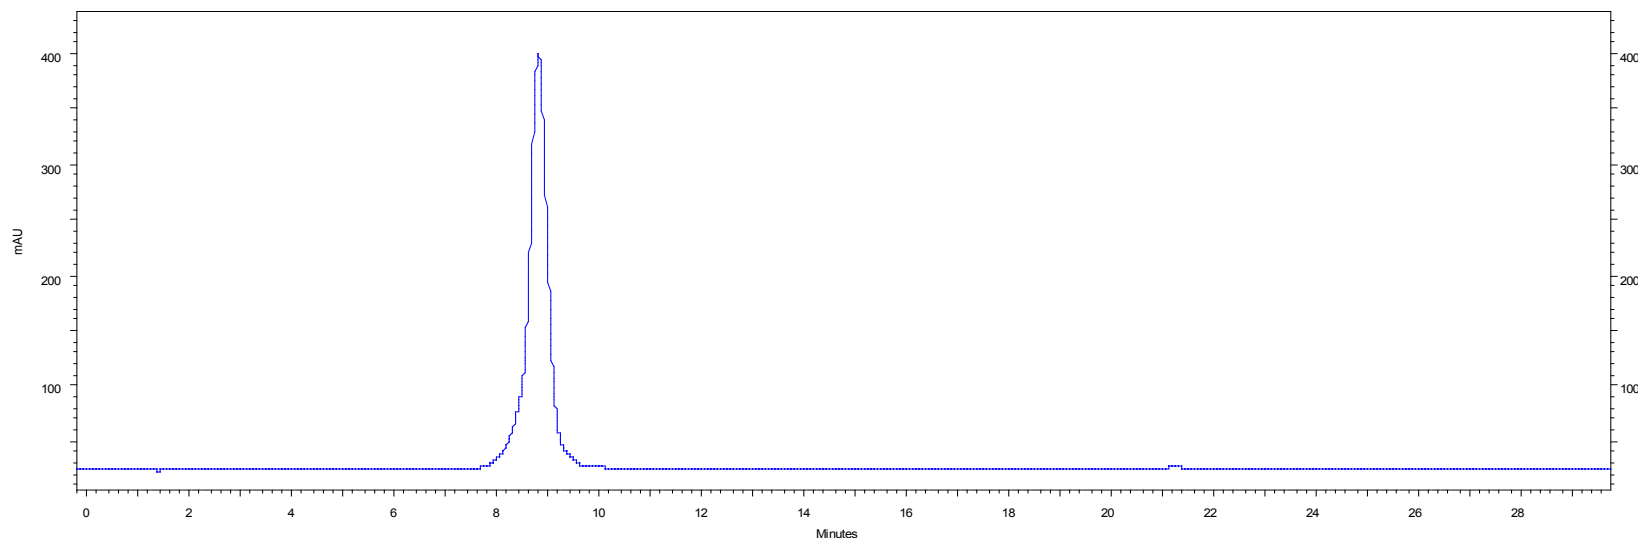

3-[2-Imino-2-(butylamino)ethyl]thymidine (3b). <sup>1</sup>H NMR

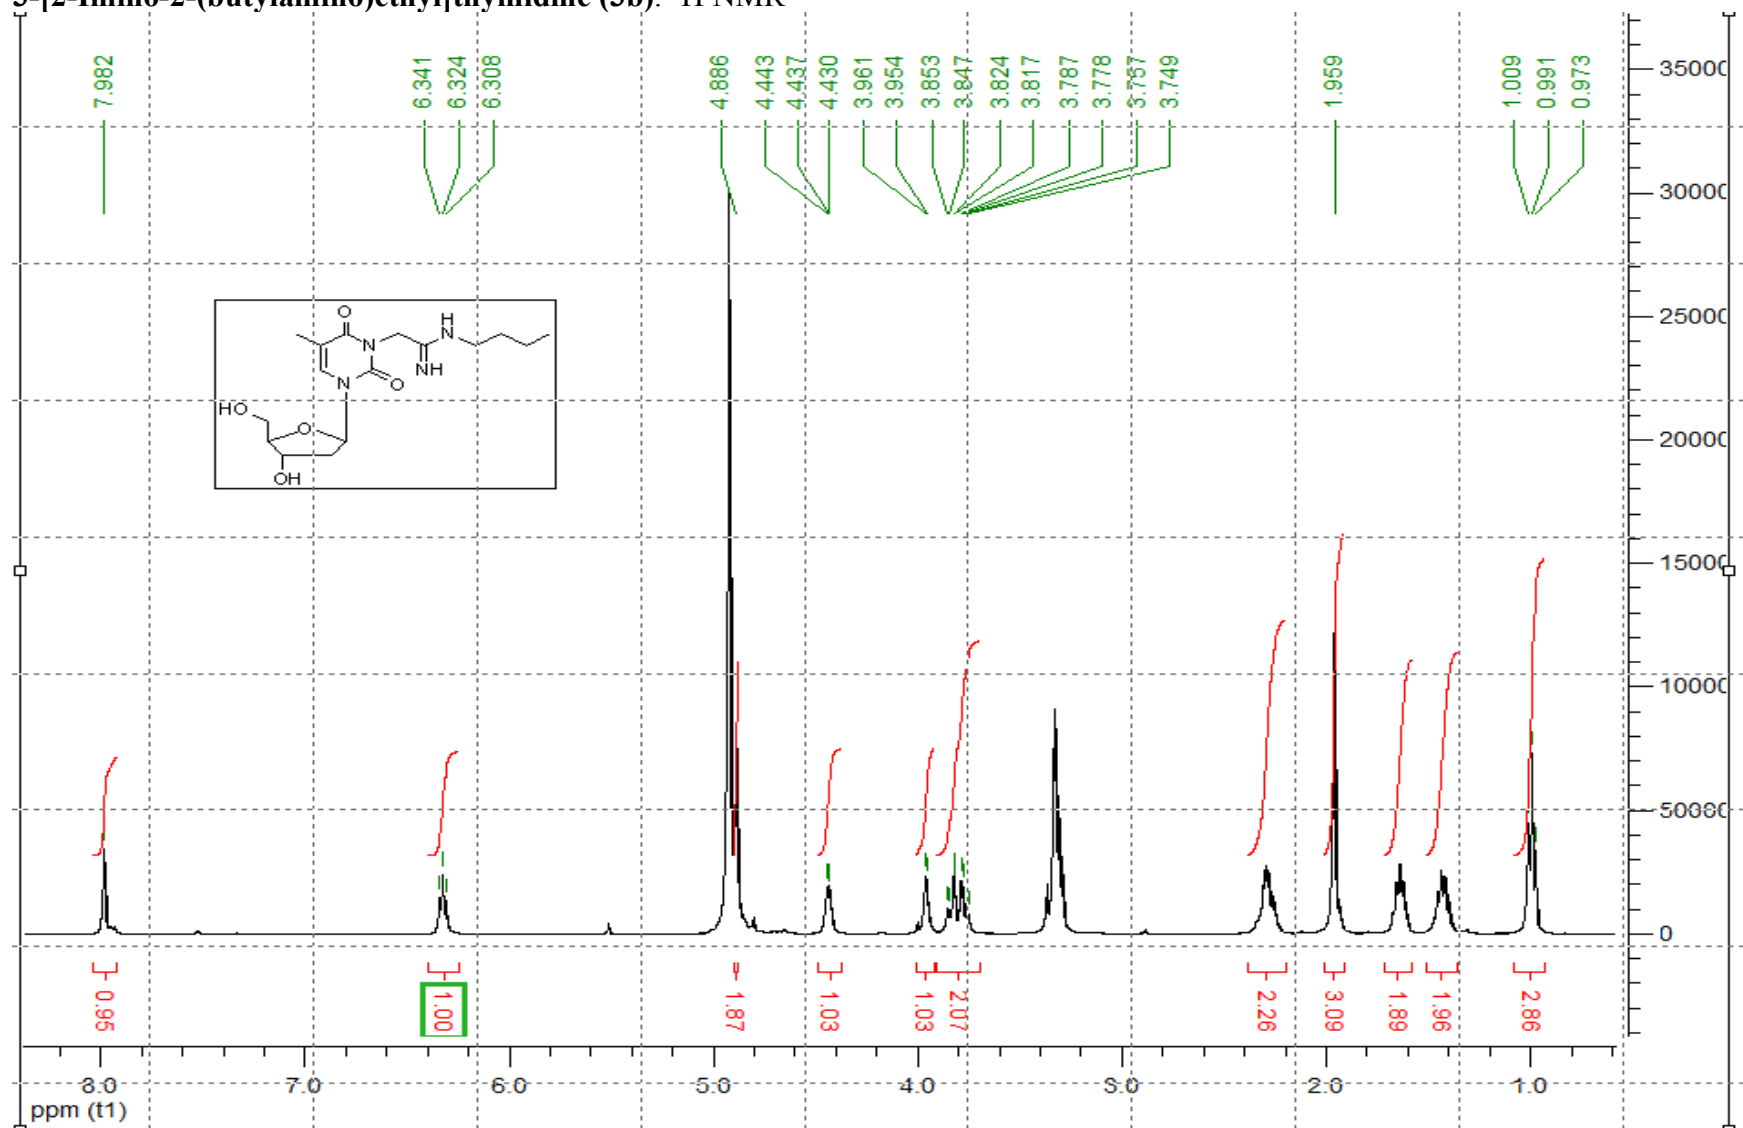

3-[2-Imino-2-(butylamino)ethyl]thymidine (3b). <sup>13</sup>C NMR

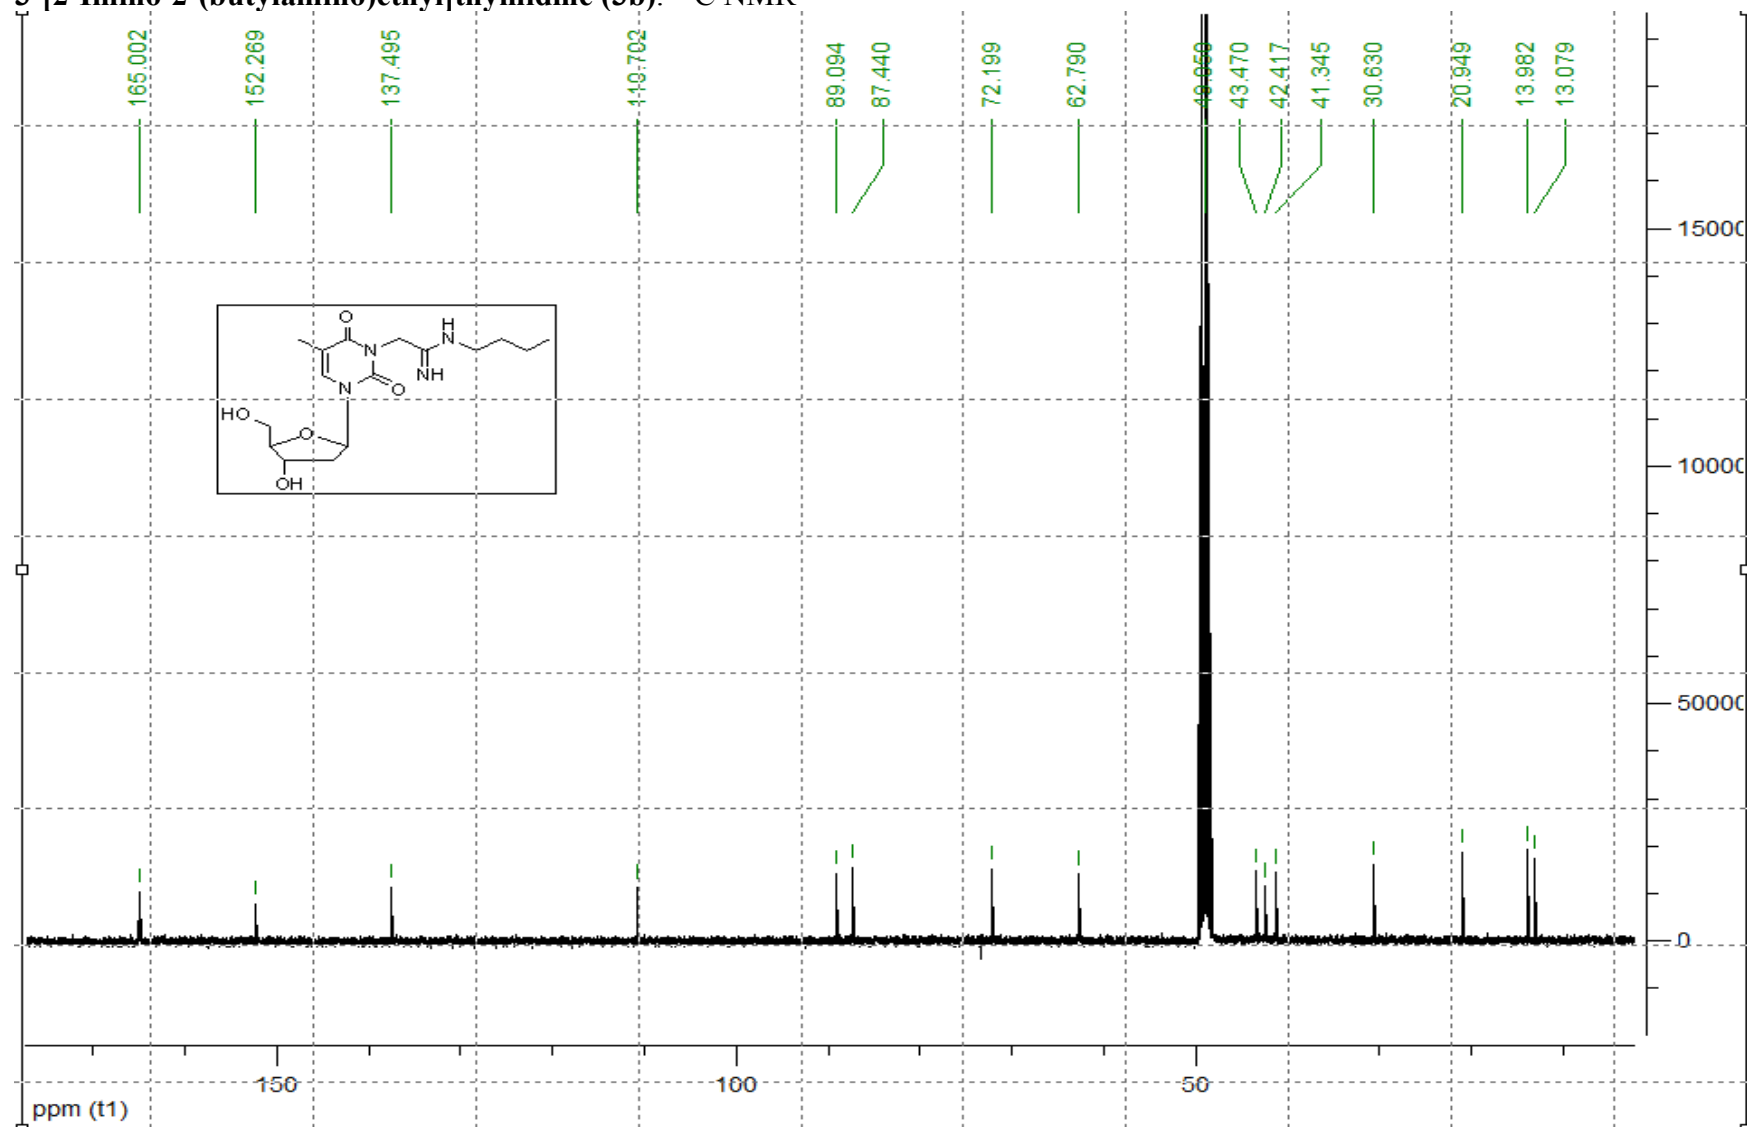

**3-[2-Imino-2-(butylamino)ethyl]thymidine (3b)**. HR-ESI-MS found: 355.1985.

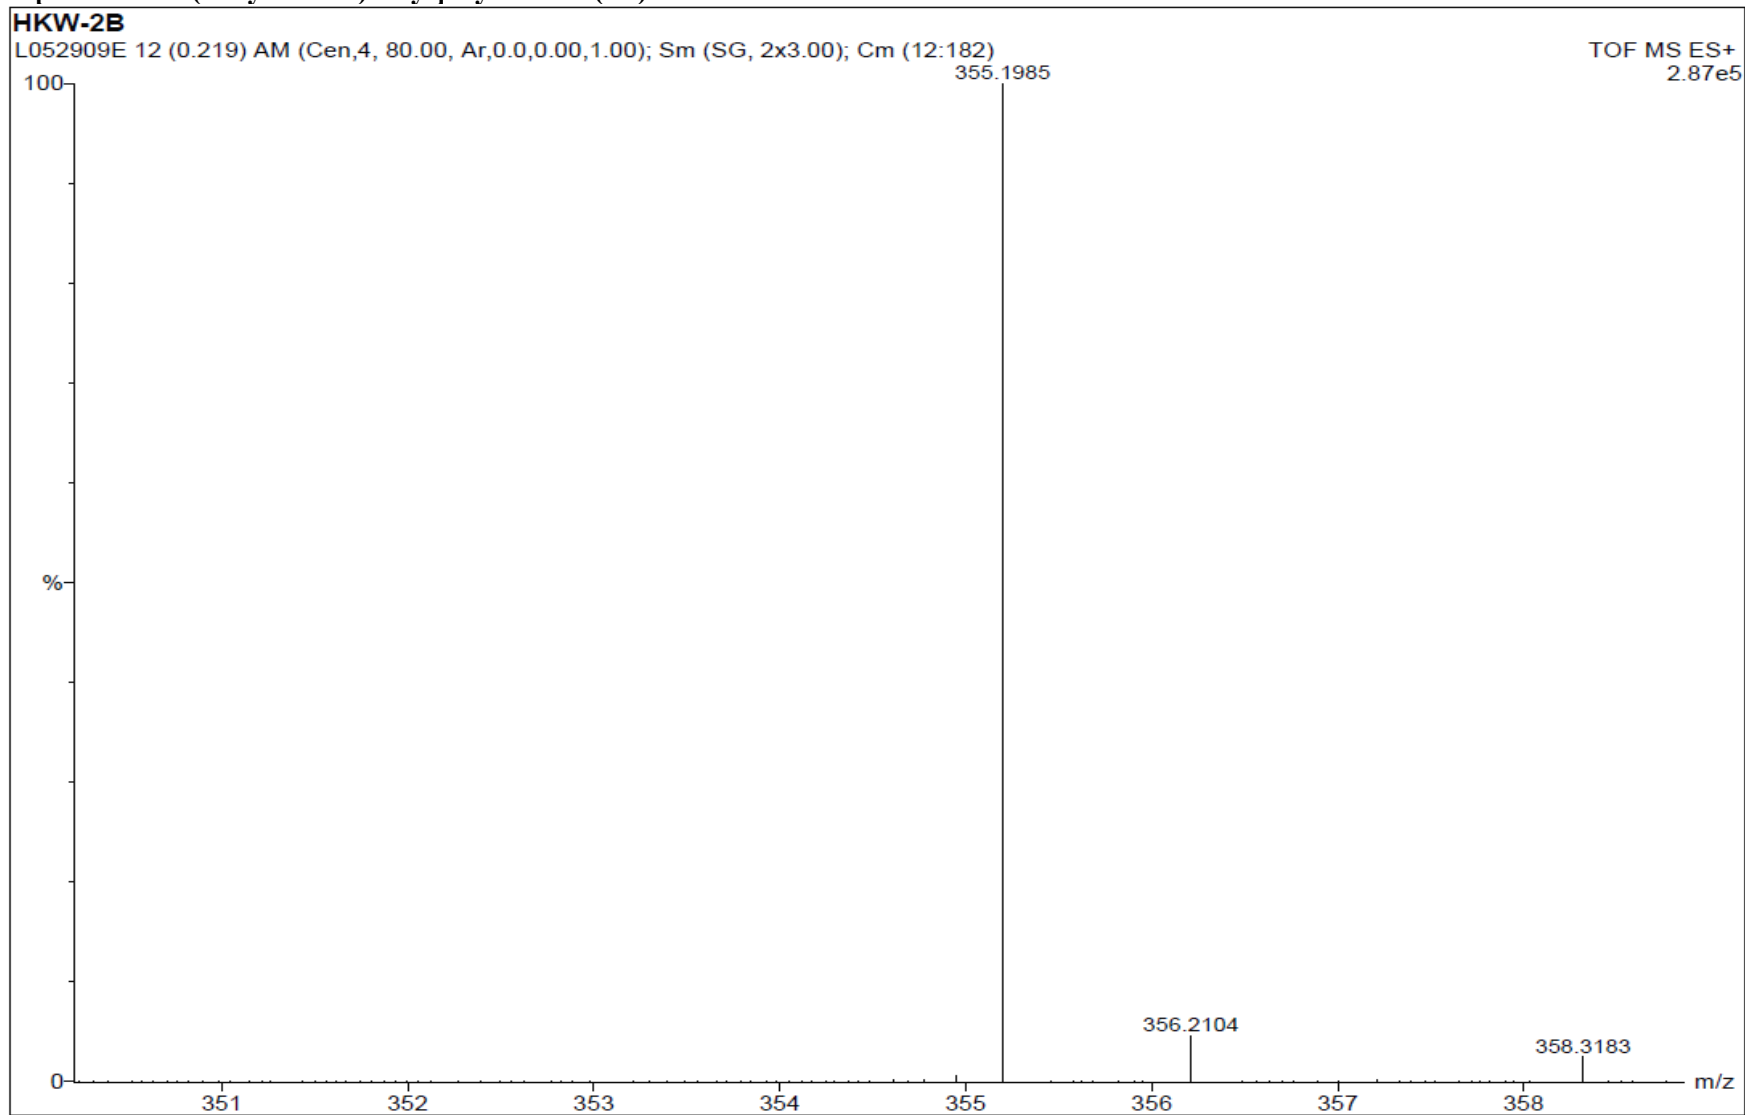

**3-[2-Imino-2-(butylamino)ethyl]thymidine (3b).** Analytical traces in Water:Acetonitrile gradient

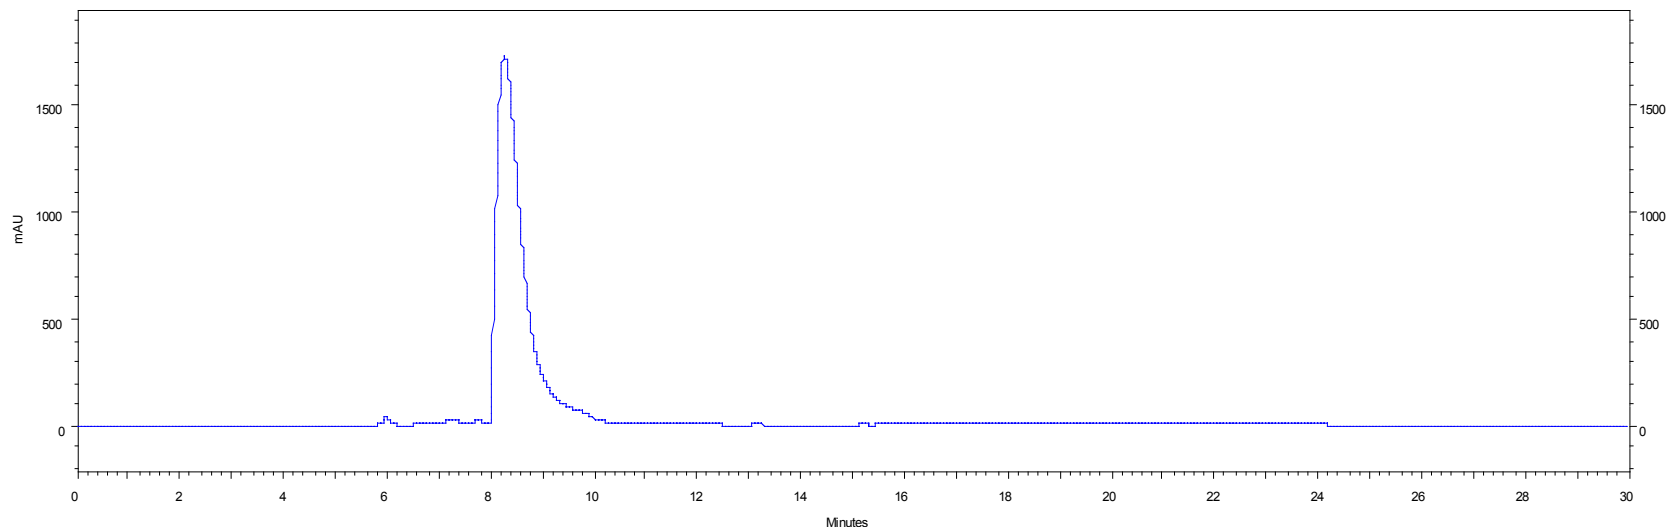

Analytical traces in Water:Methanol gradient

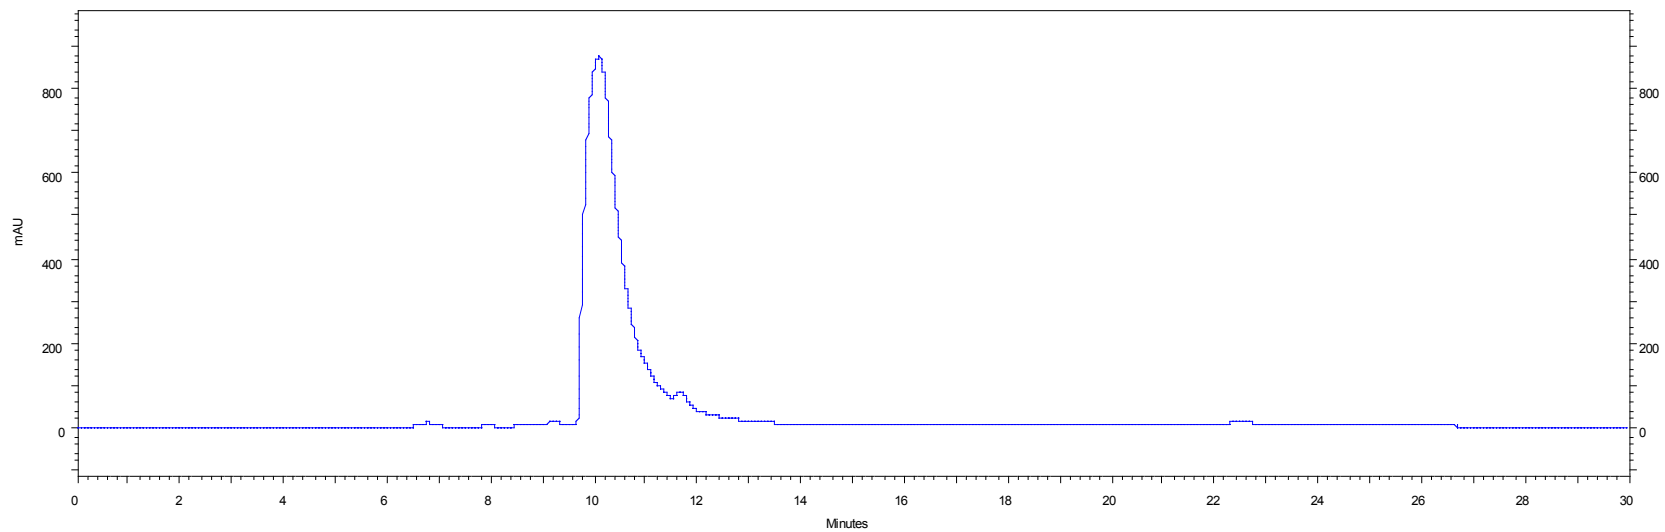

3-[2-Imino-2-(phenylamino)ethyl]thymidine (3c). <sup>1</sup>H NMR

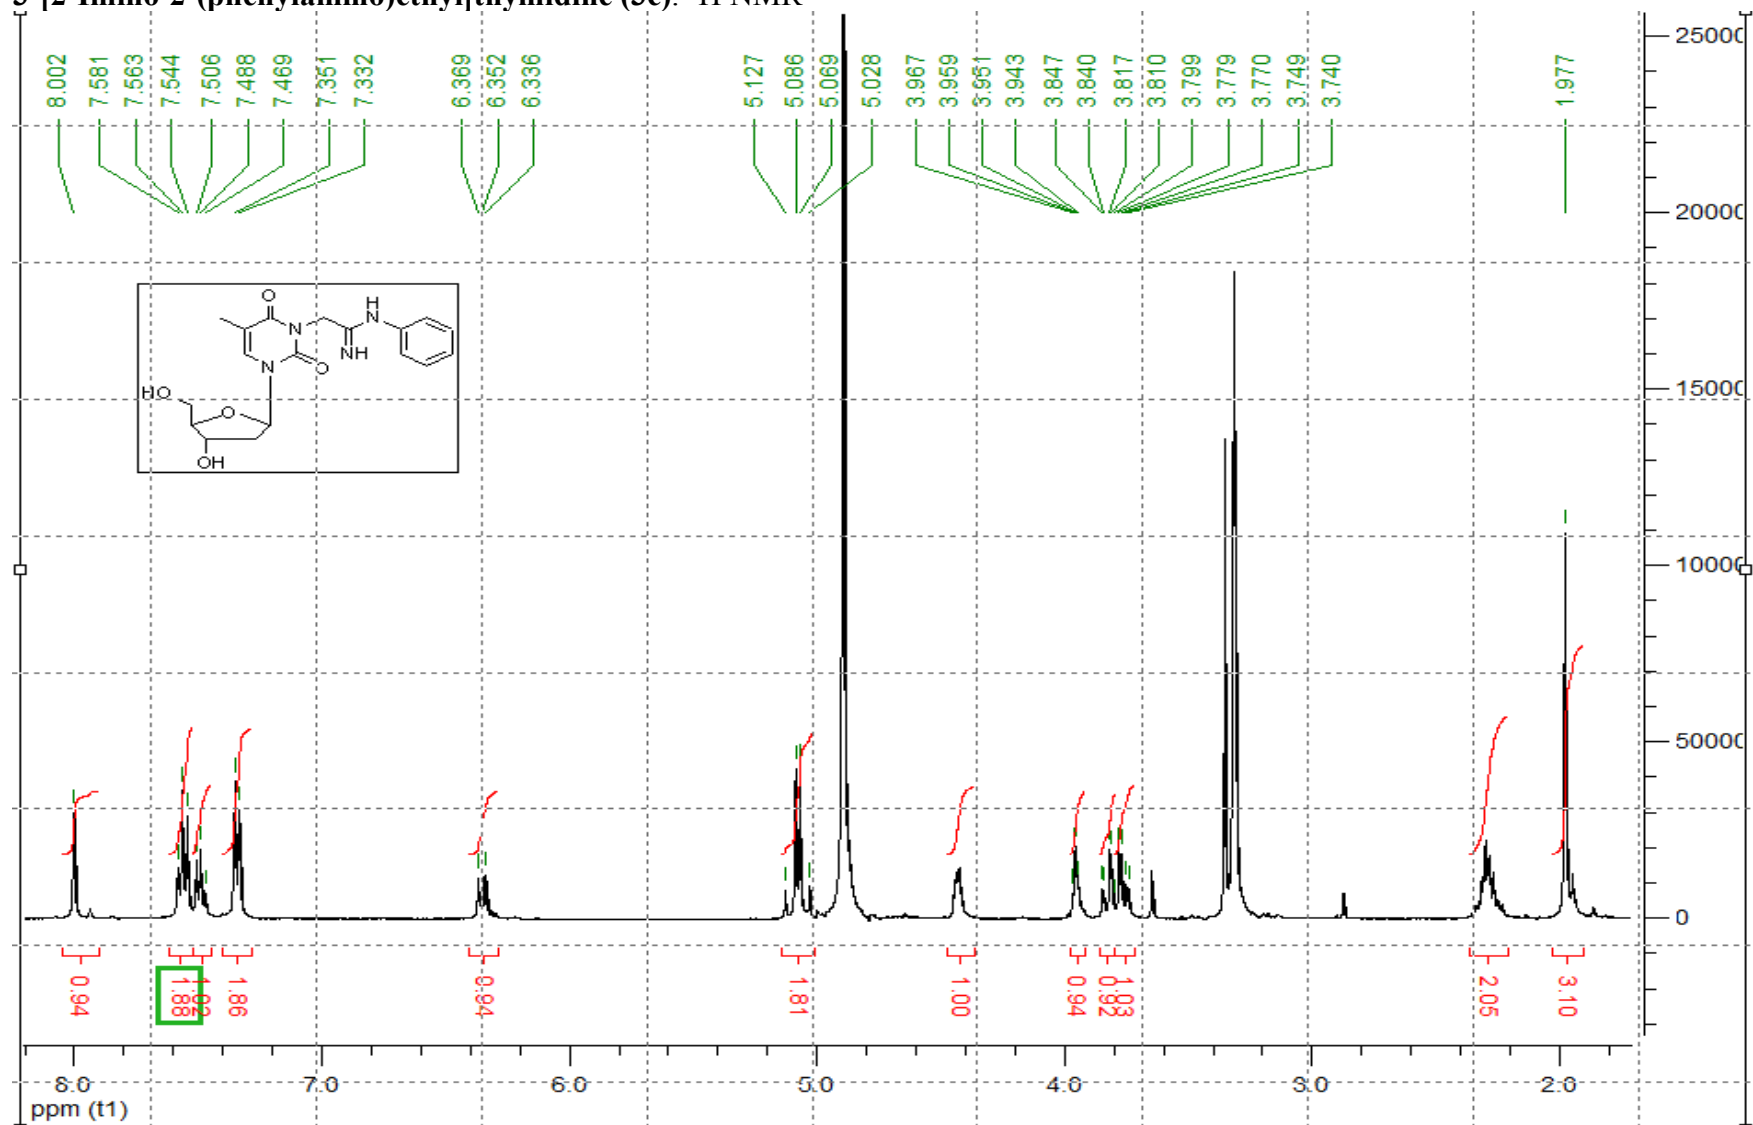

3-[2-Imino-2-(phenylamino)ethyl]thymidine (3c). <sup>13</sup>C NMR

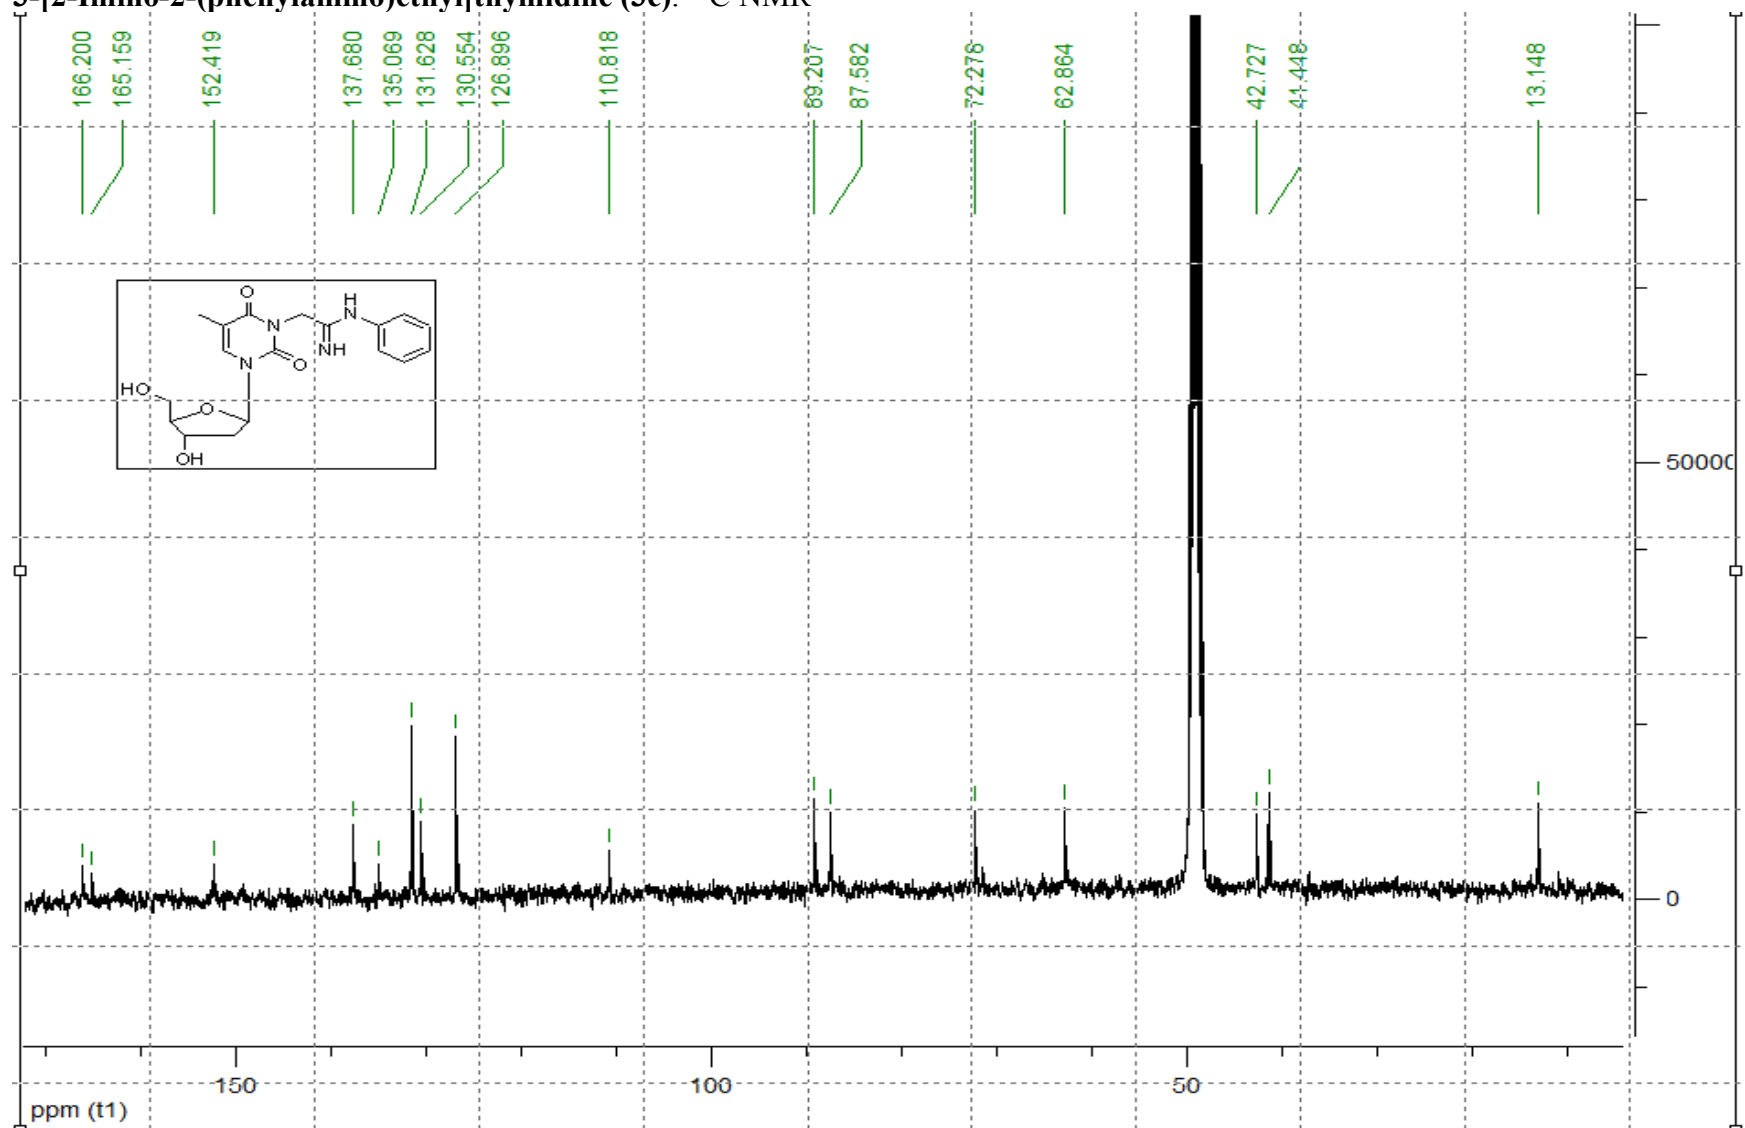



**3-[2-Imino-2-(phenylamino)ethyl]thymidine (3c).** HR-ESI-MS found: 375.1677.

L111510F 250 (8.789) AM (Cen,4, 80.00, Ar,5000.0,0.00,0.70); Sm (SG, 2x3.00); Cm (250:269)

TOF MS ES+  
1.42e5

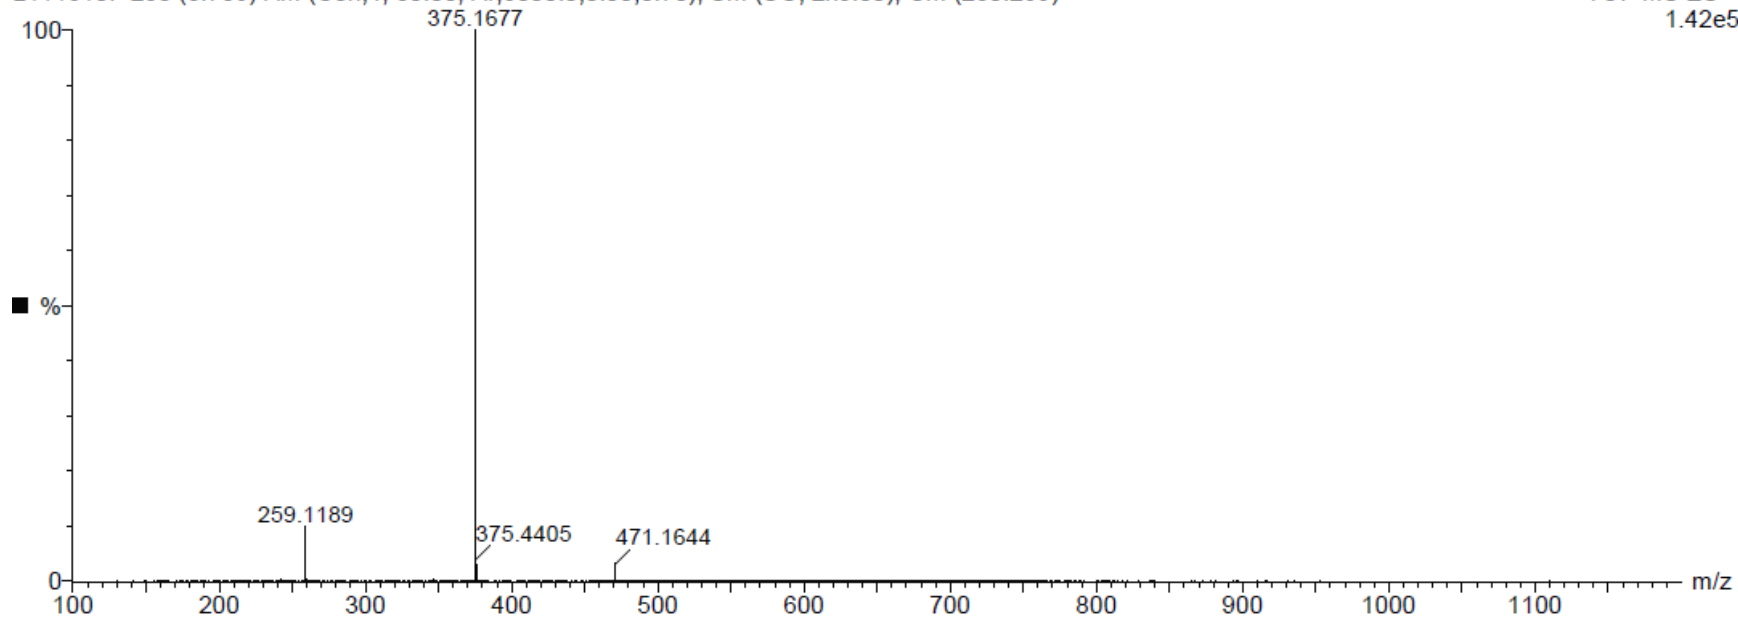

**3-[2-Imino-2-(phenylamino)ethyl]thymidine (3c).** Analytical traces in Water:Acetonitrile gradient

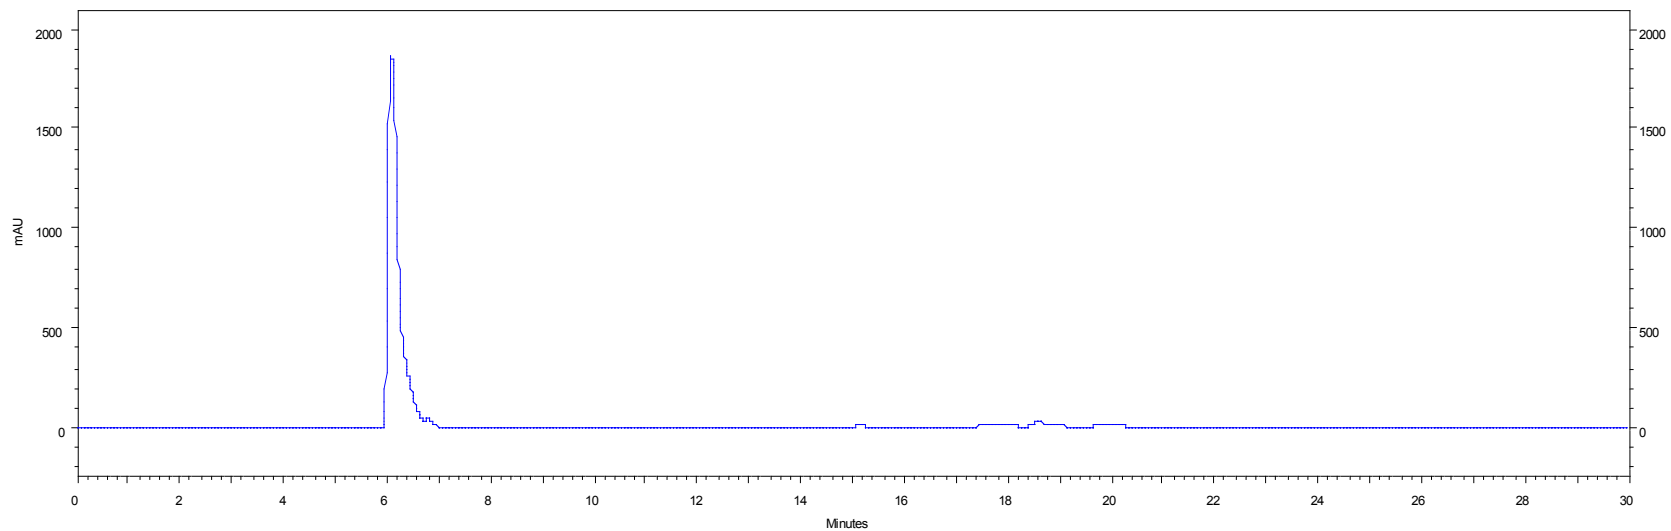

Analytical traces in Water:Methanol gradient

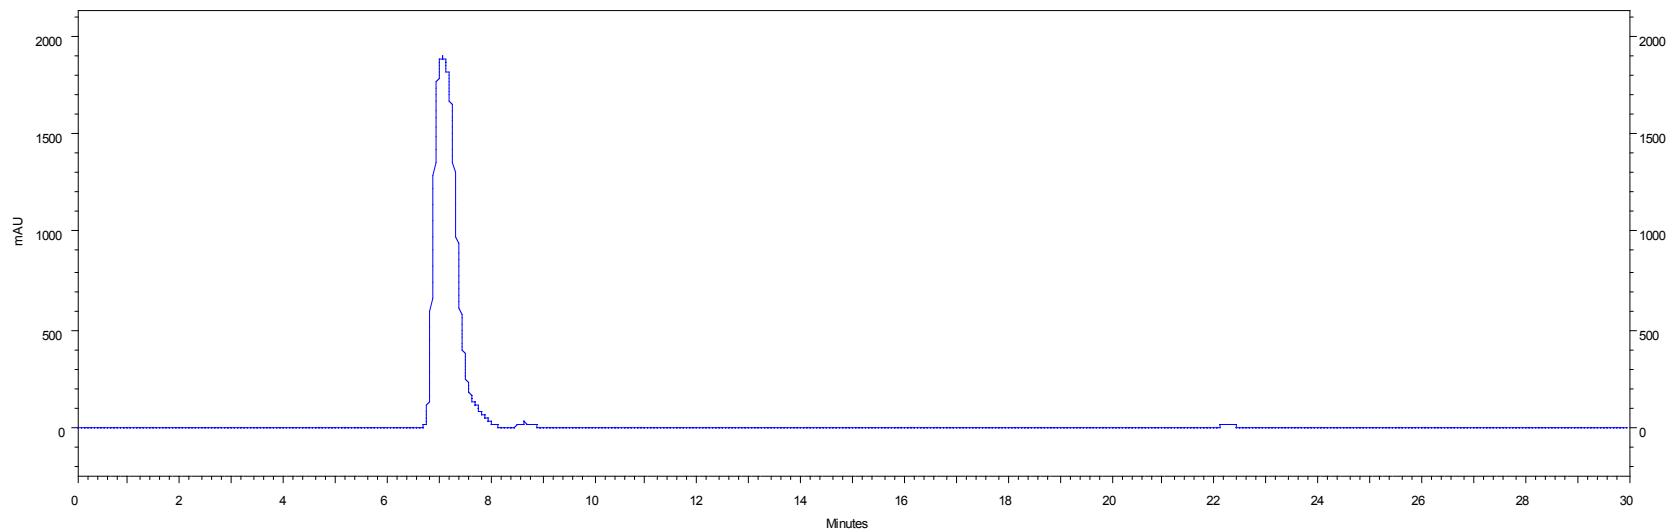

3-[2-Imino-2-(benzylamino)ethyl]thymidine (3d). <sup>1</sup>H NMR

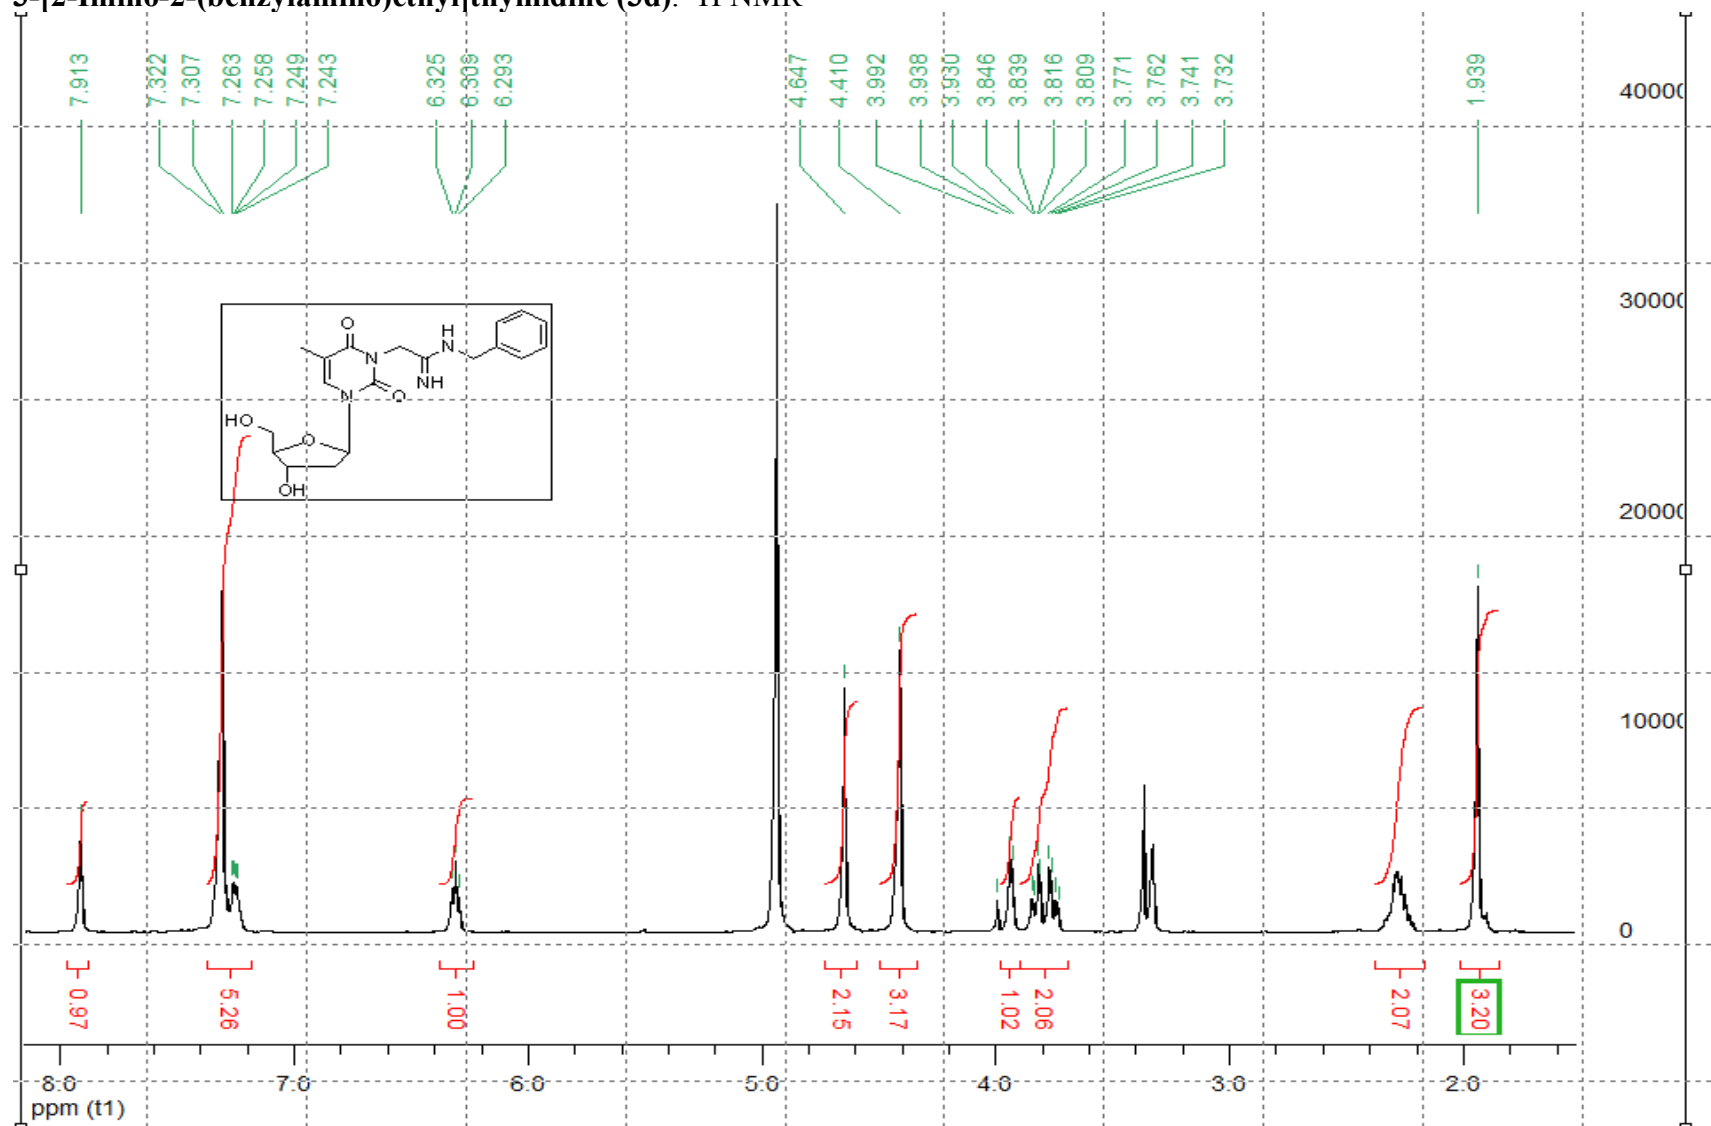

3-[2-Imino-2-(benzylamino)ethyl]thymidine (3d). <sup>13</sup>C NMR

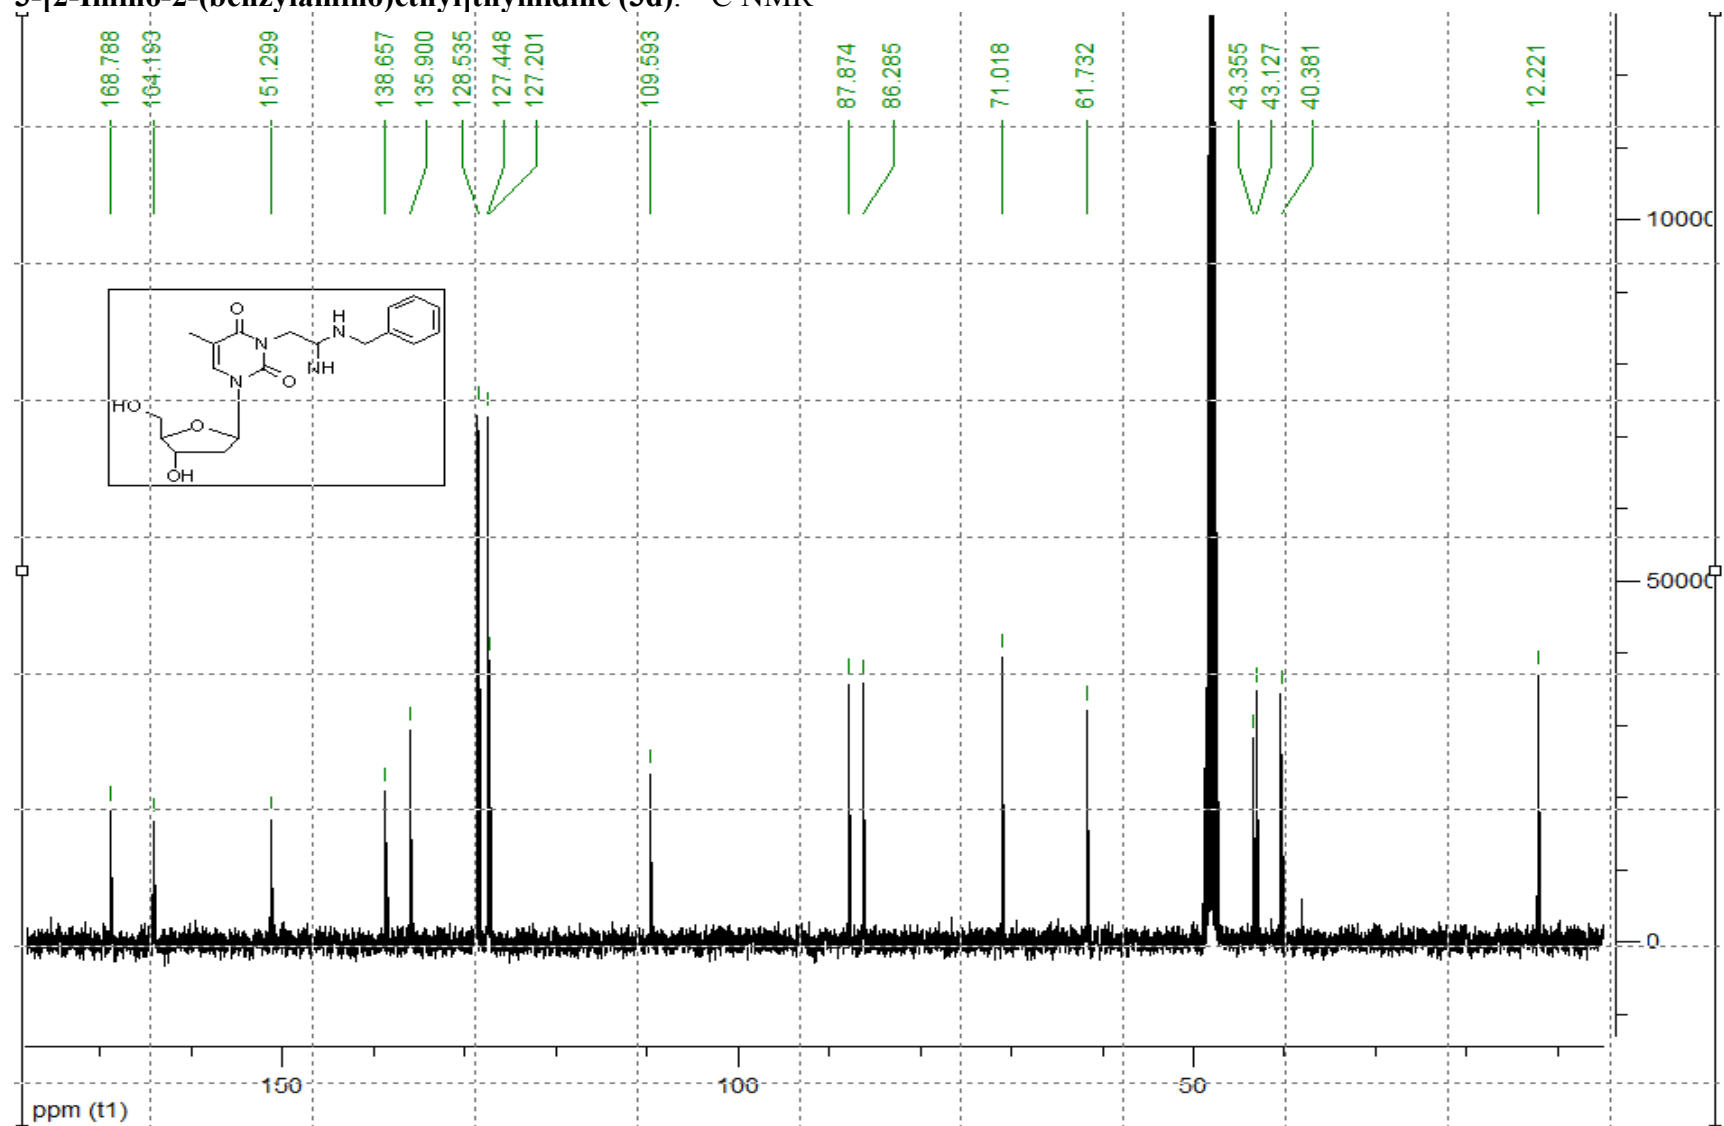

**3-[2-Imino-2-(benzylamino)ethyl]thymidine (3d).** HR-ESI-MS found: 389.1808

L052509N 350 (11.115) AM (Cen,4, 80.00, Ar,0.0,0.00,1.00); Sm (SG, 2x3.00); Cm (295:351)

TOF MS ES+  
8.49e3

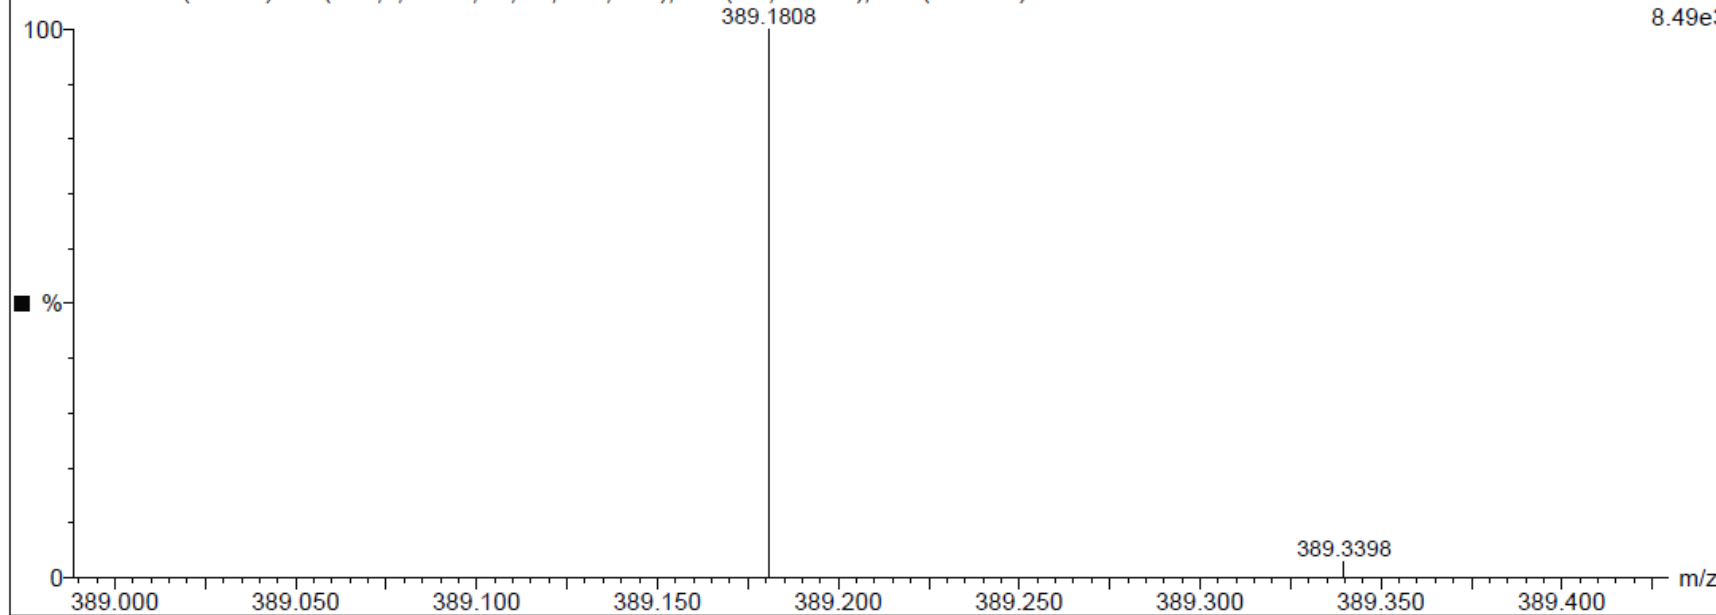

**3-[2-Imino-2-(benzylamino)ethyl]thymidine (3d). Analytical traces in Water:Acetonitrile gradient**

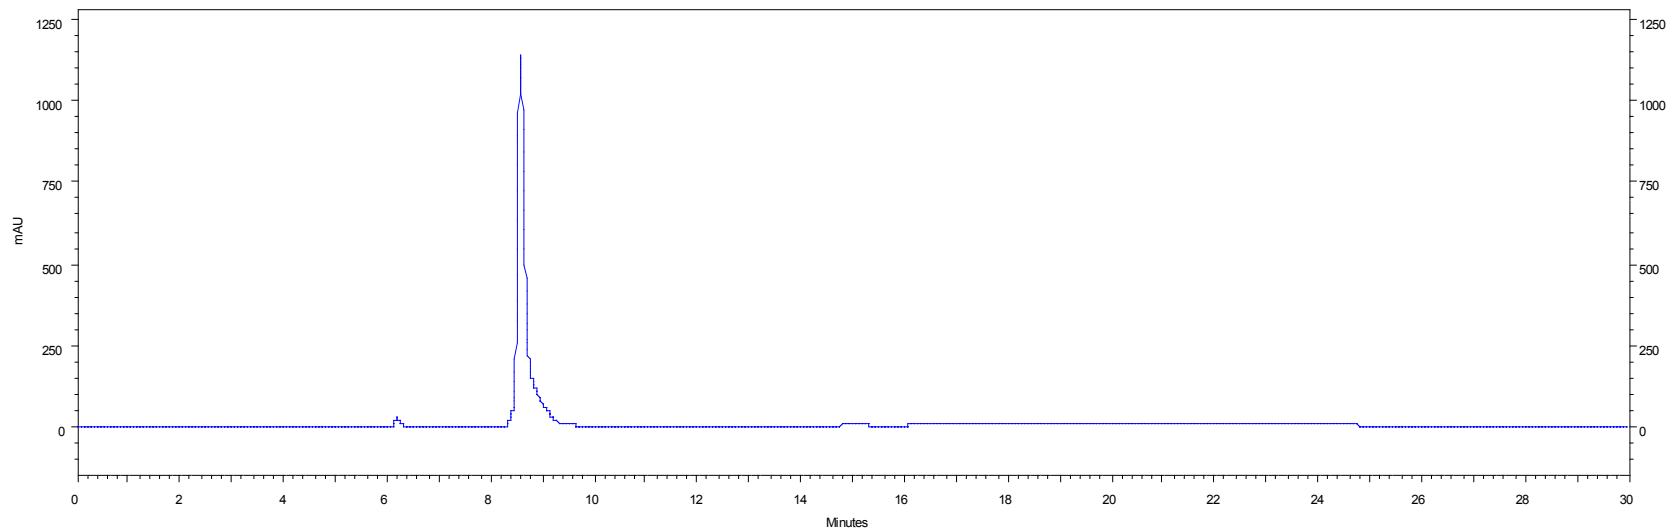

**Analytical traces in Water:Methanol gradient**

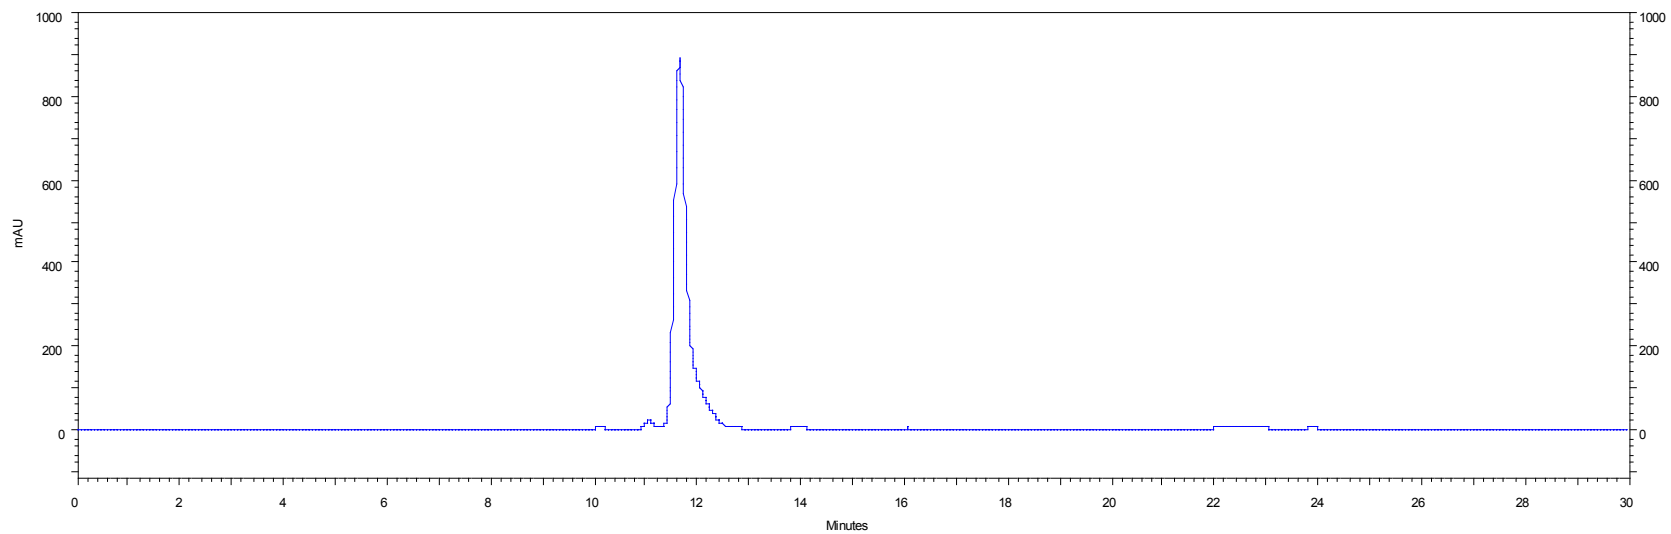

3-[2-Imino-2-{2-(*closo*-1,7-carboranyl)ethylamino}ethyl]thymidine (3e). <sup>1</sup>H NMR

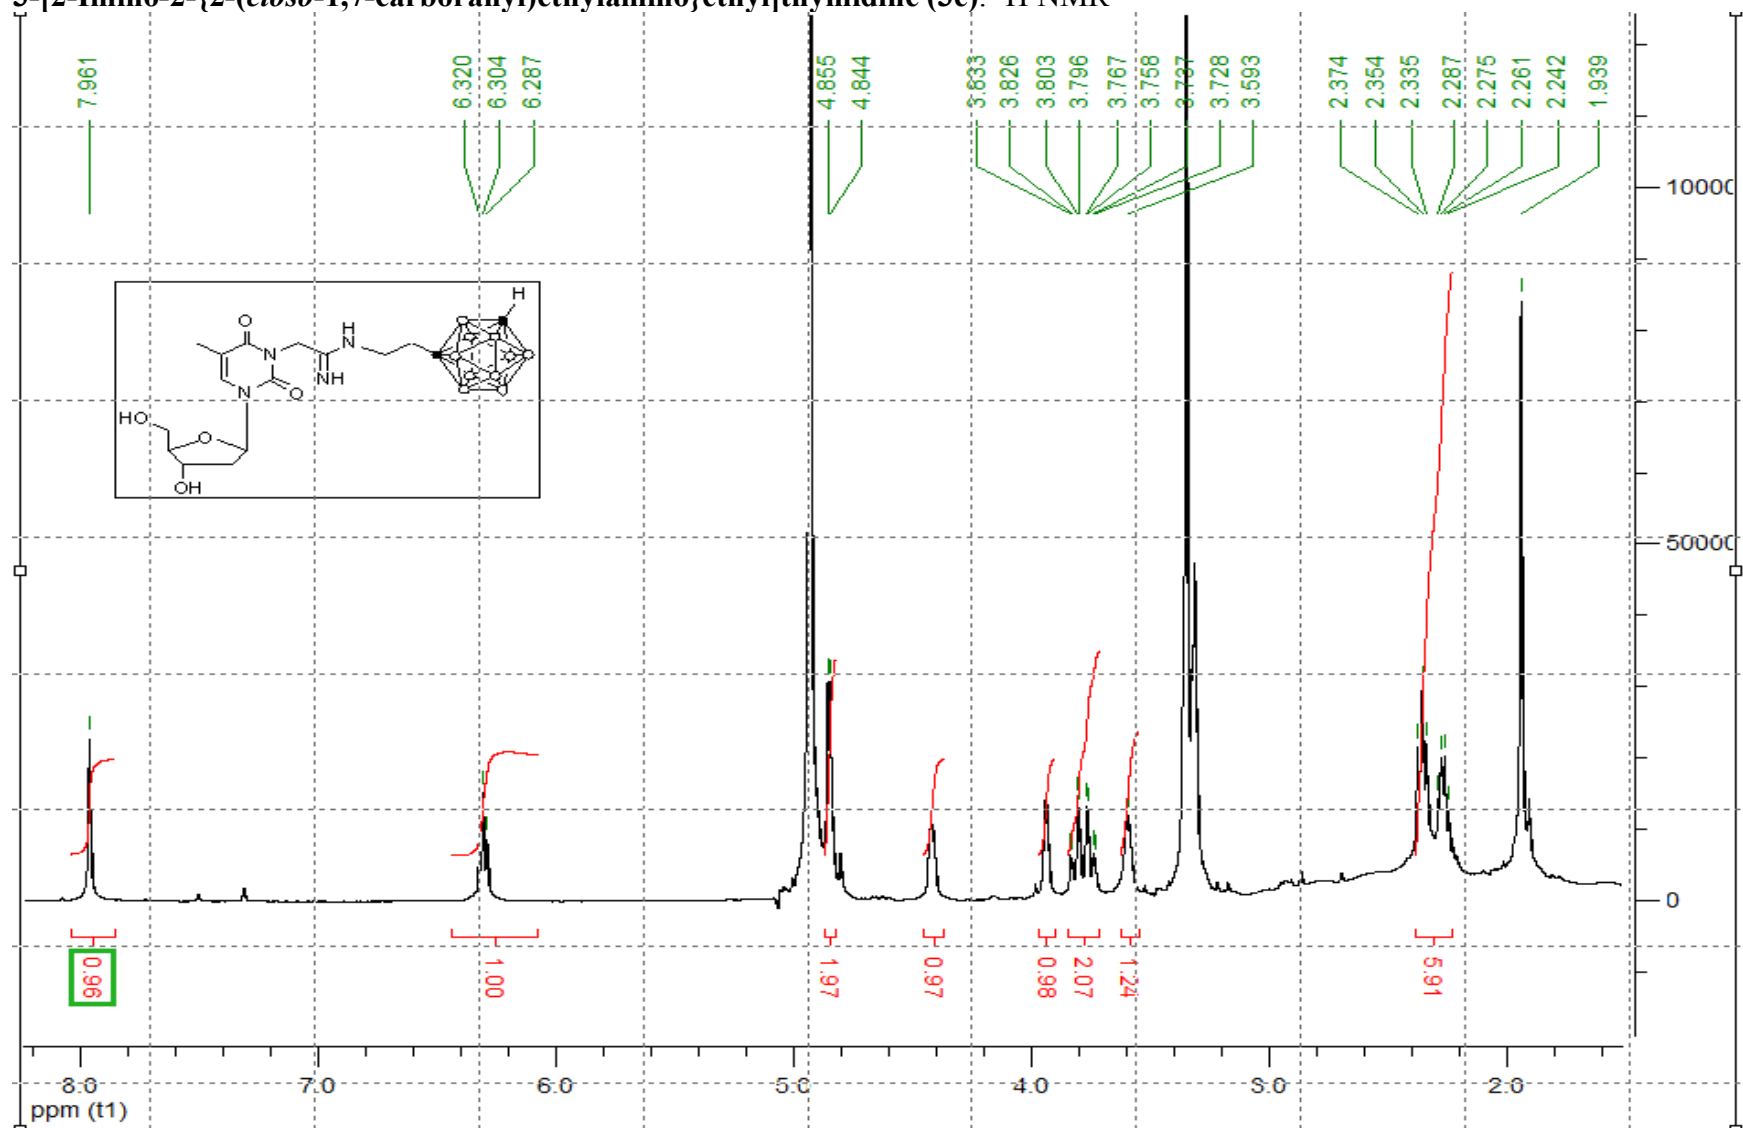

3-[2-Imino-2-{2-(*closo*-1,7-carboranyl)ethylamino}ethyl]thymidine (3e). <sup>13</sup>C NMR

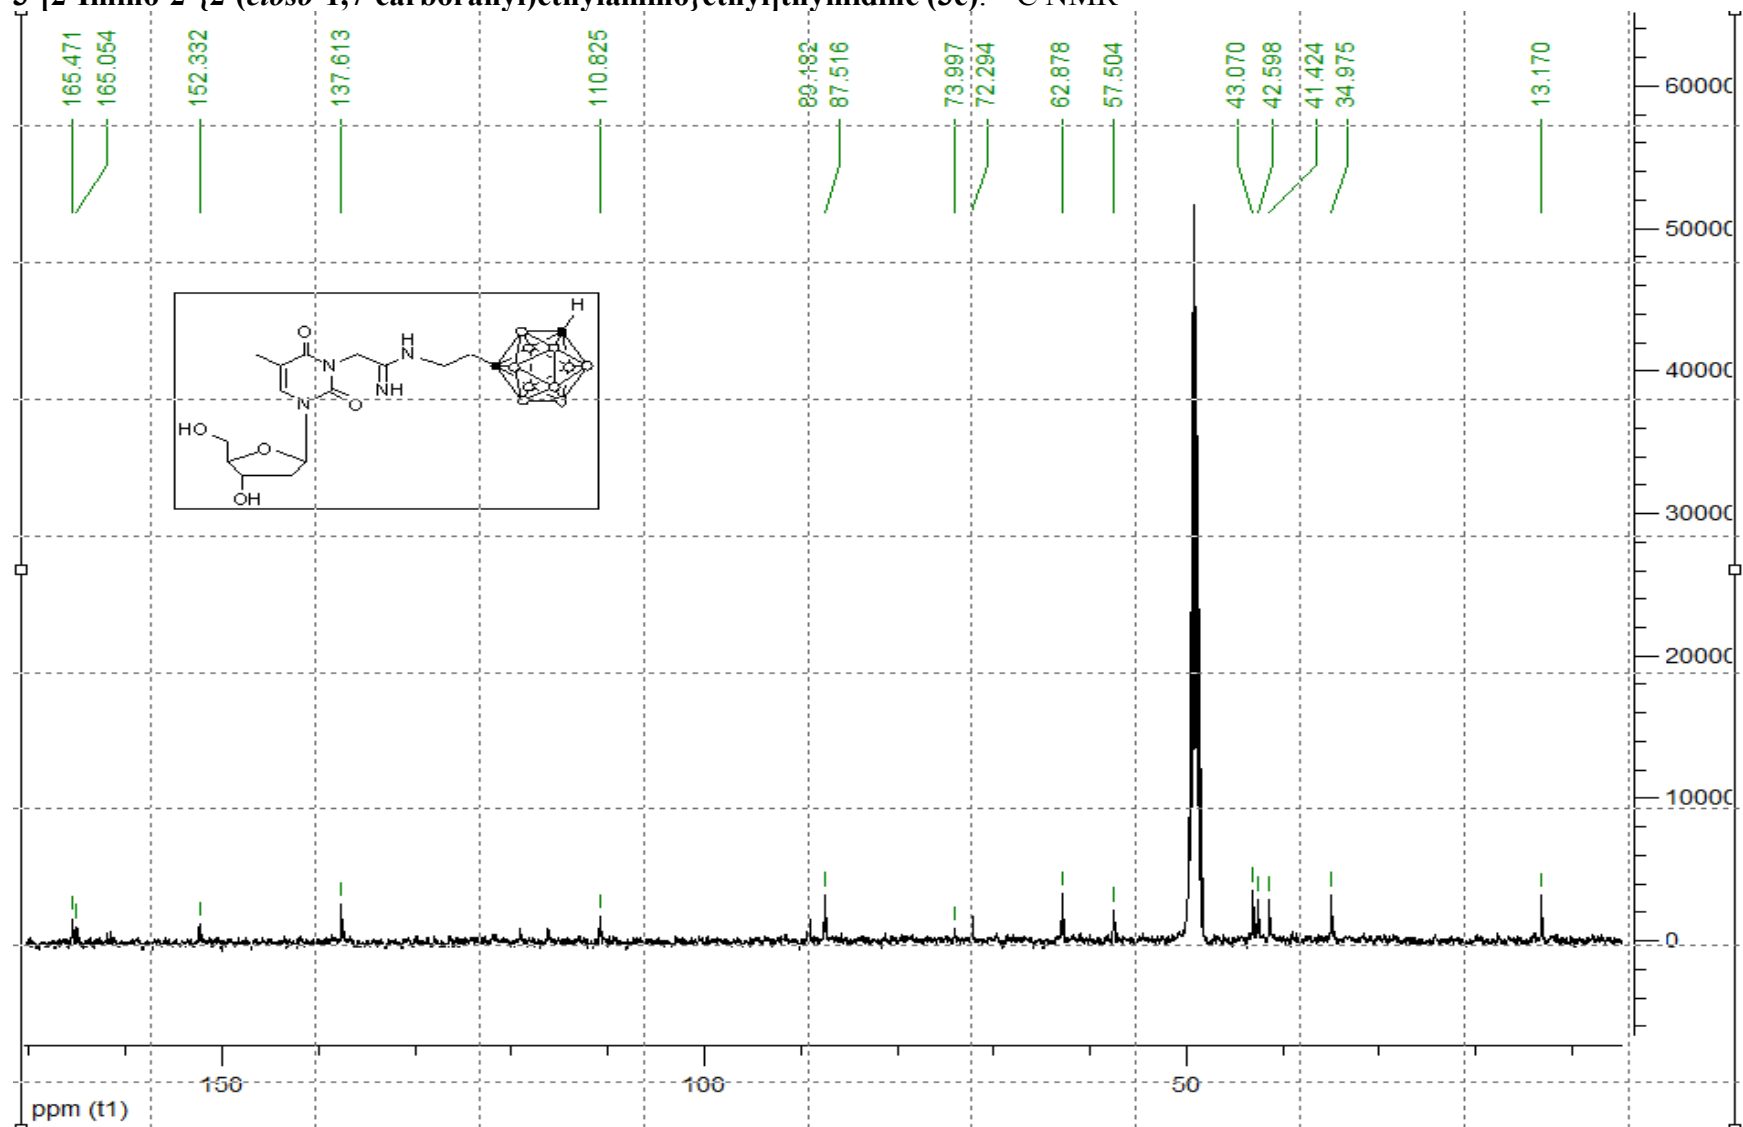



3-[2-Imino-2-{2-(*closo*-1,7-carboranyl)ethylamino}ethyl]thymidine (3e). HR-ESI-MS found: 469.3476.

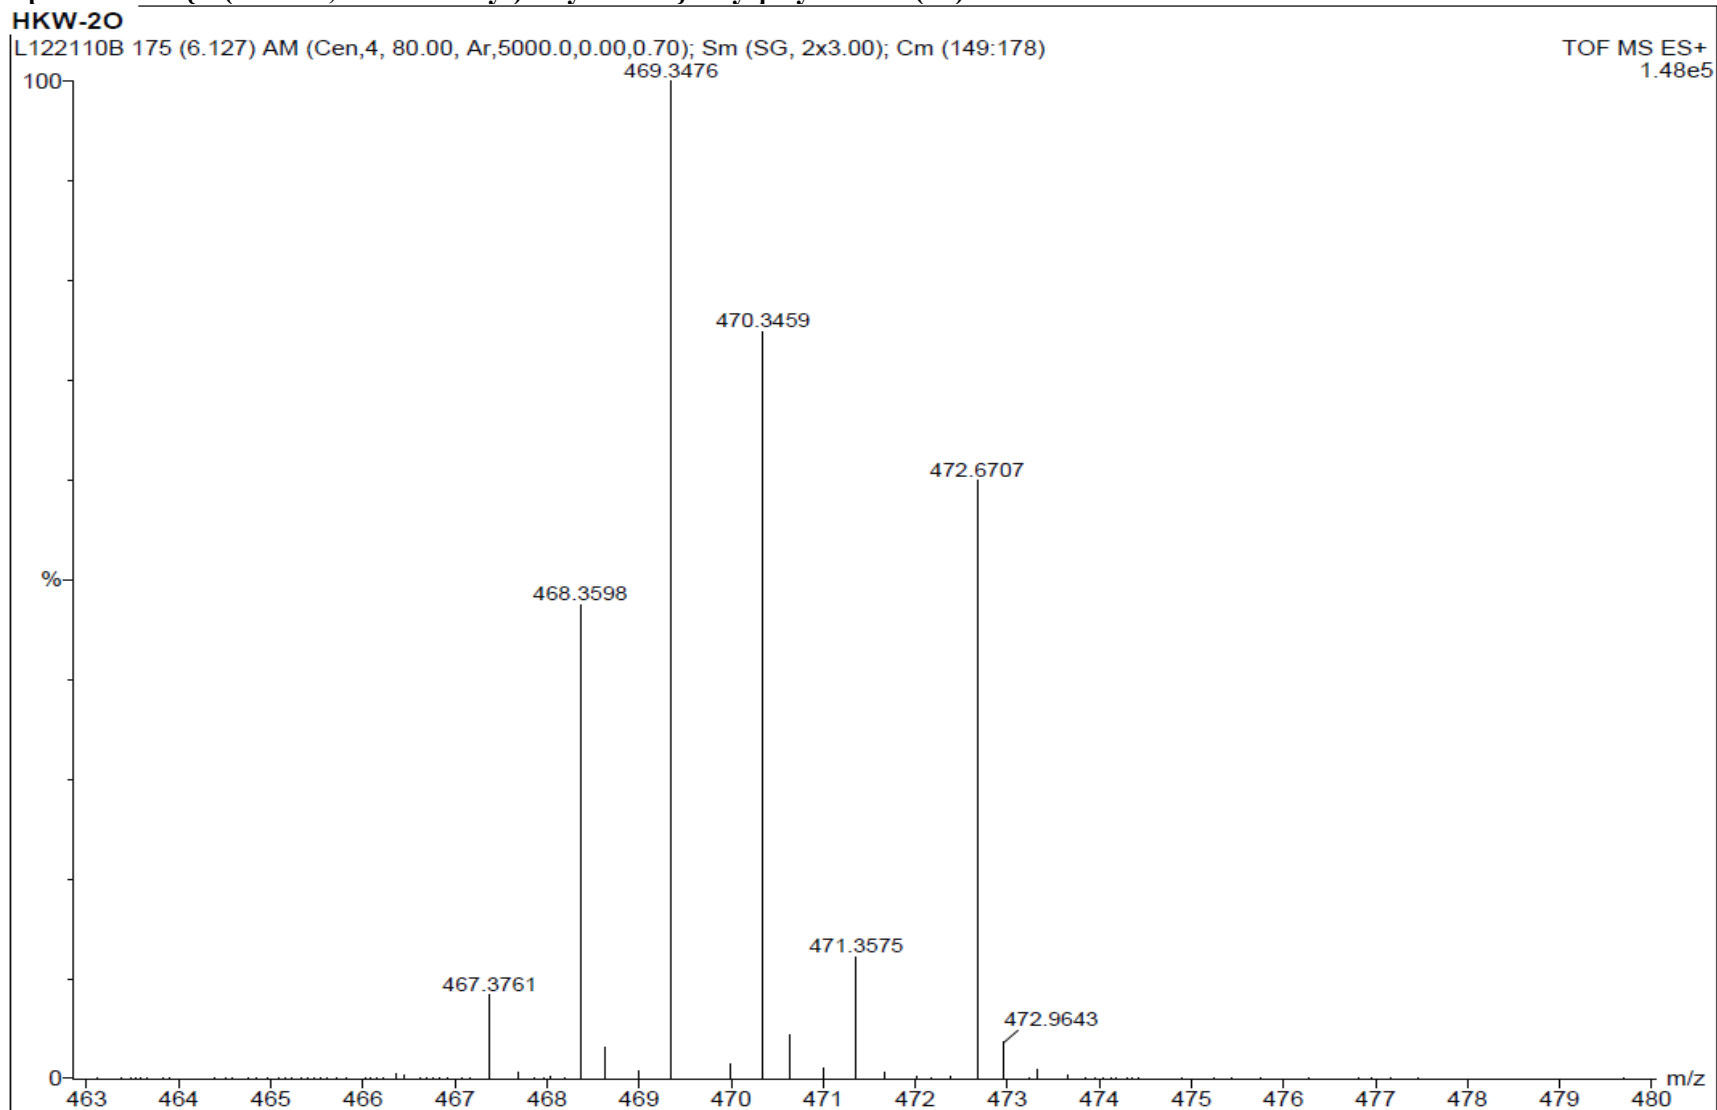

**3-[2-Imino-2-{2-(*closo*-1,7-carboranyl)ethylamino}ethyl]thymidine (3e).** Analytical traces in Water:Acetonitrile gradient

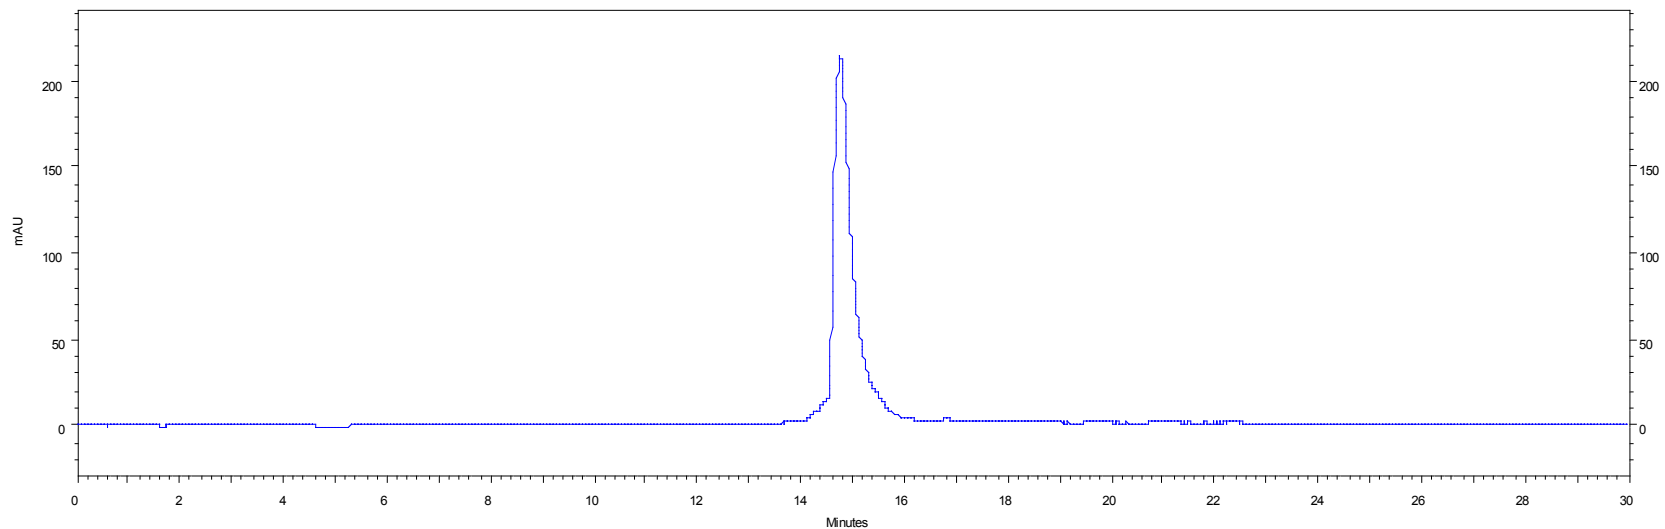

Analytical traces in Water:Methanol gradient

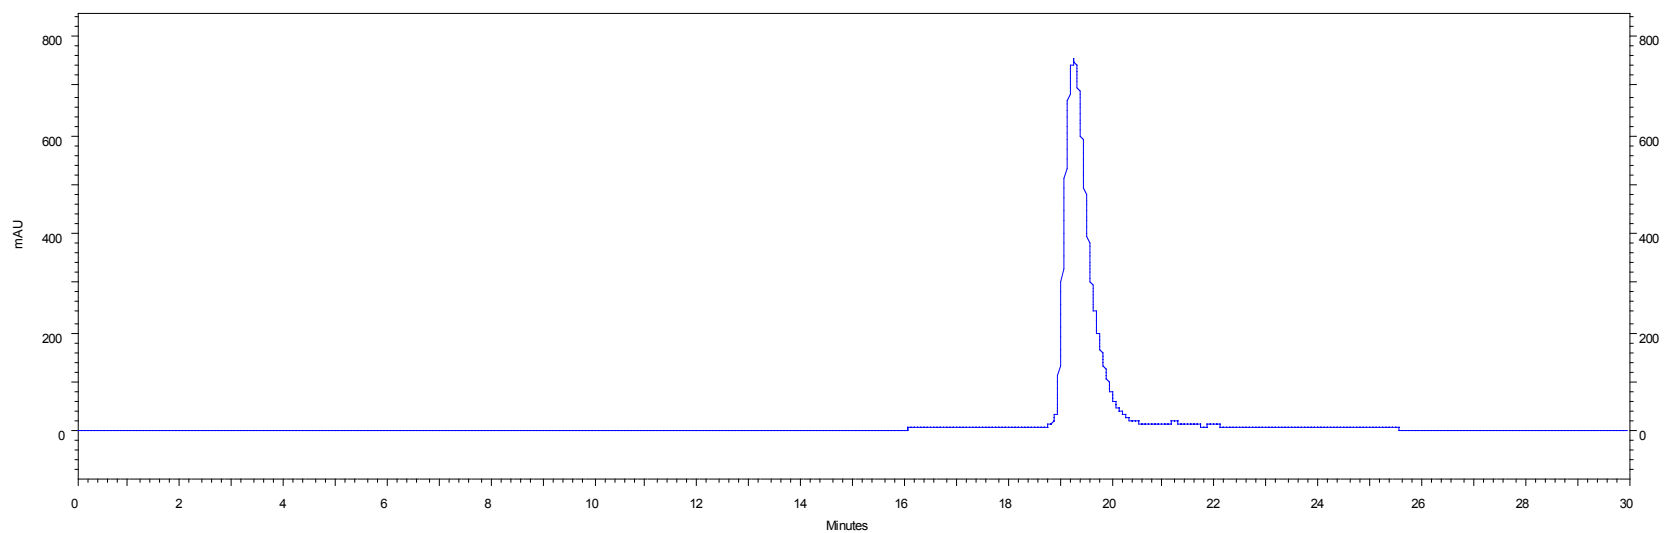

3-[2-Imino-2-{3-(*closo*-1,7-carboranyl)propylamino}ethyl]thymidine (3f). <sup>1</sup>H NMR

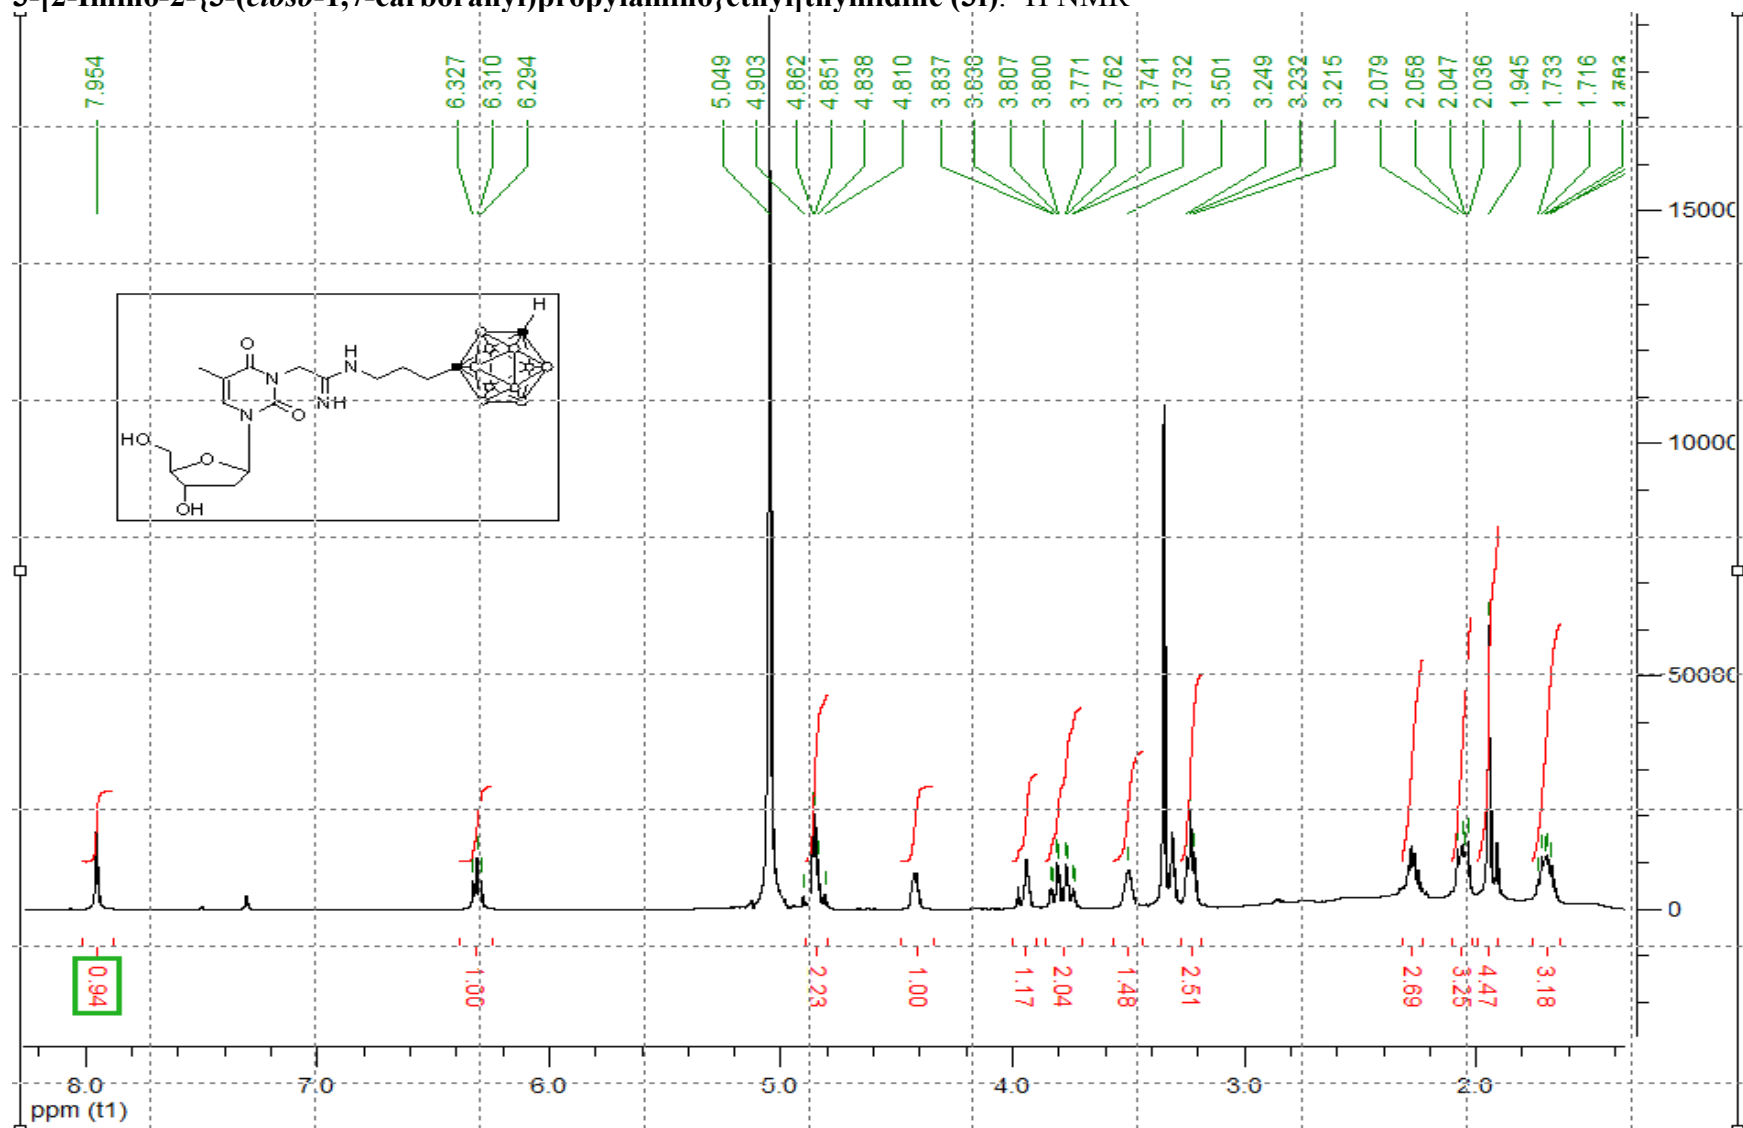

3-[2-Imino-2-{3-(*closo*-1,7-carboranyl)propylamino}ethyl]thymidine (3f).  $^{13}\text{C}$  NMR

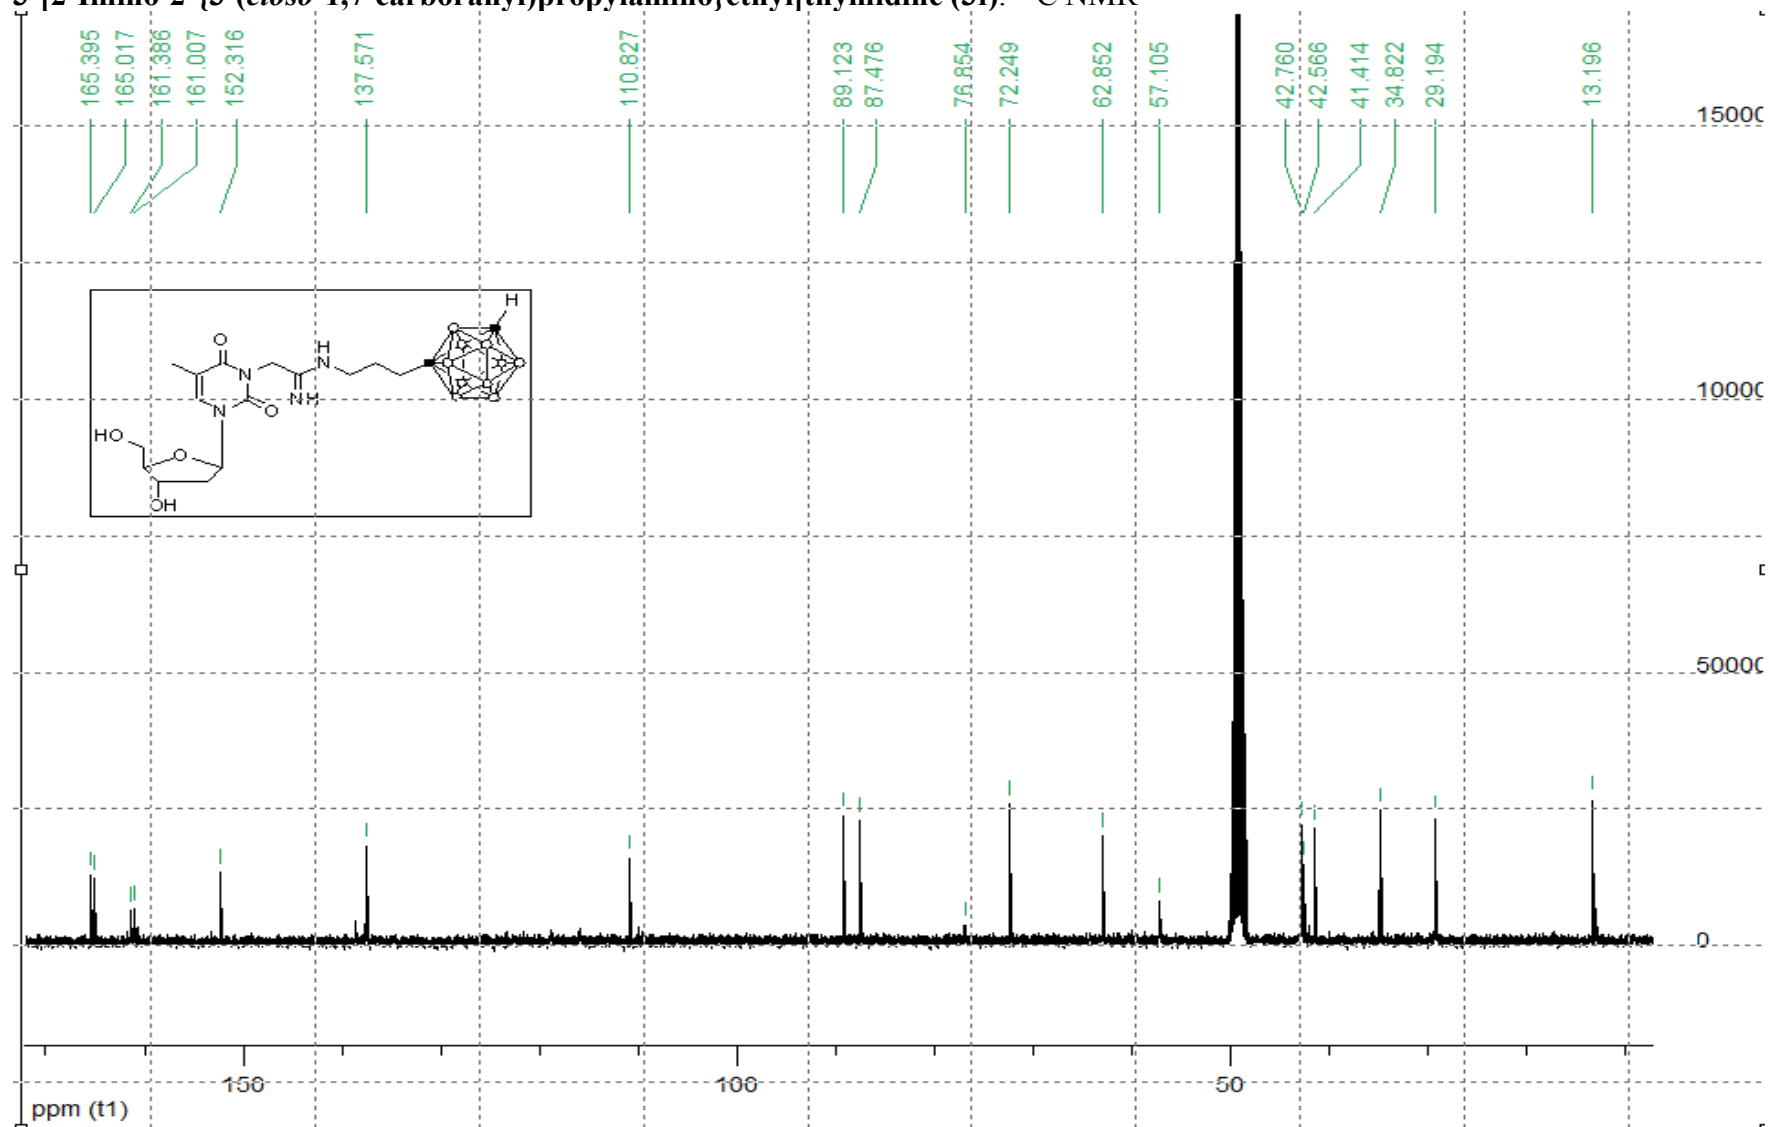

3-[2-Imino-2-{3-(*closo*-1,7-carboranyl)propylamino}ethyl]thymidine (3f). HR-ESI-MS found: 483.3611.

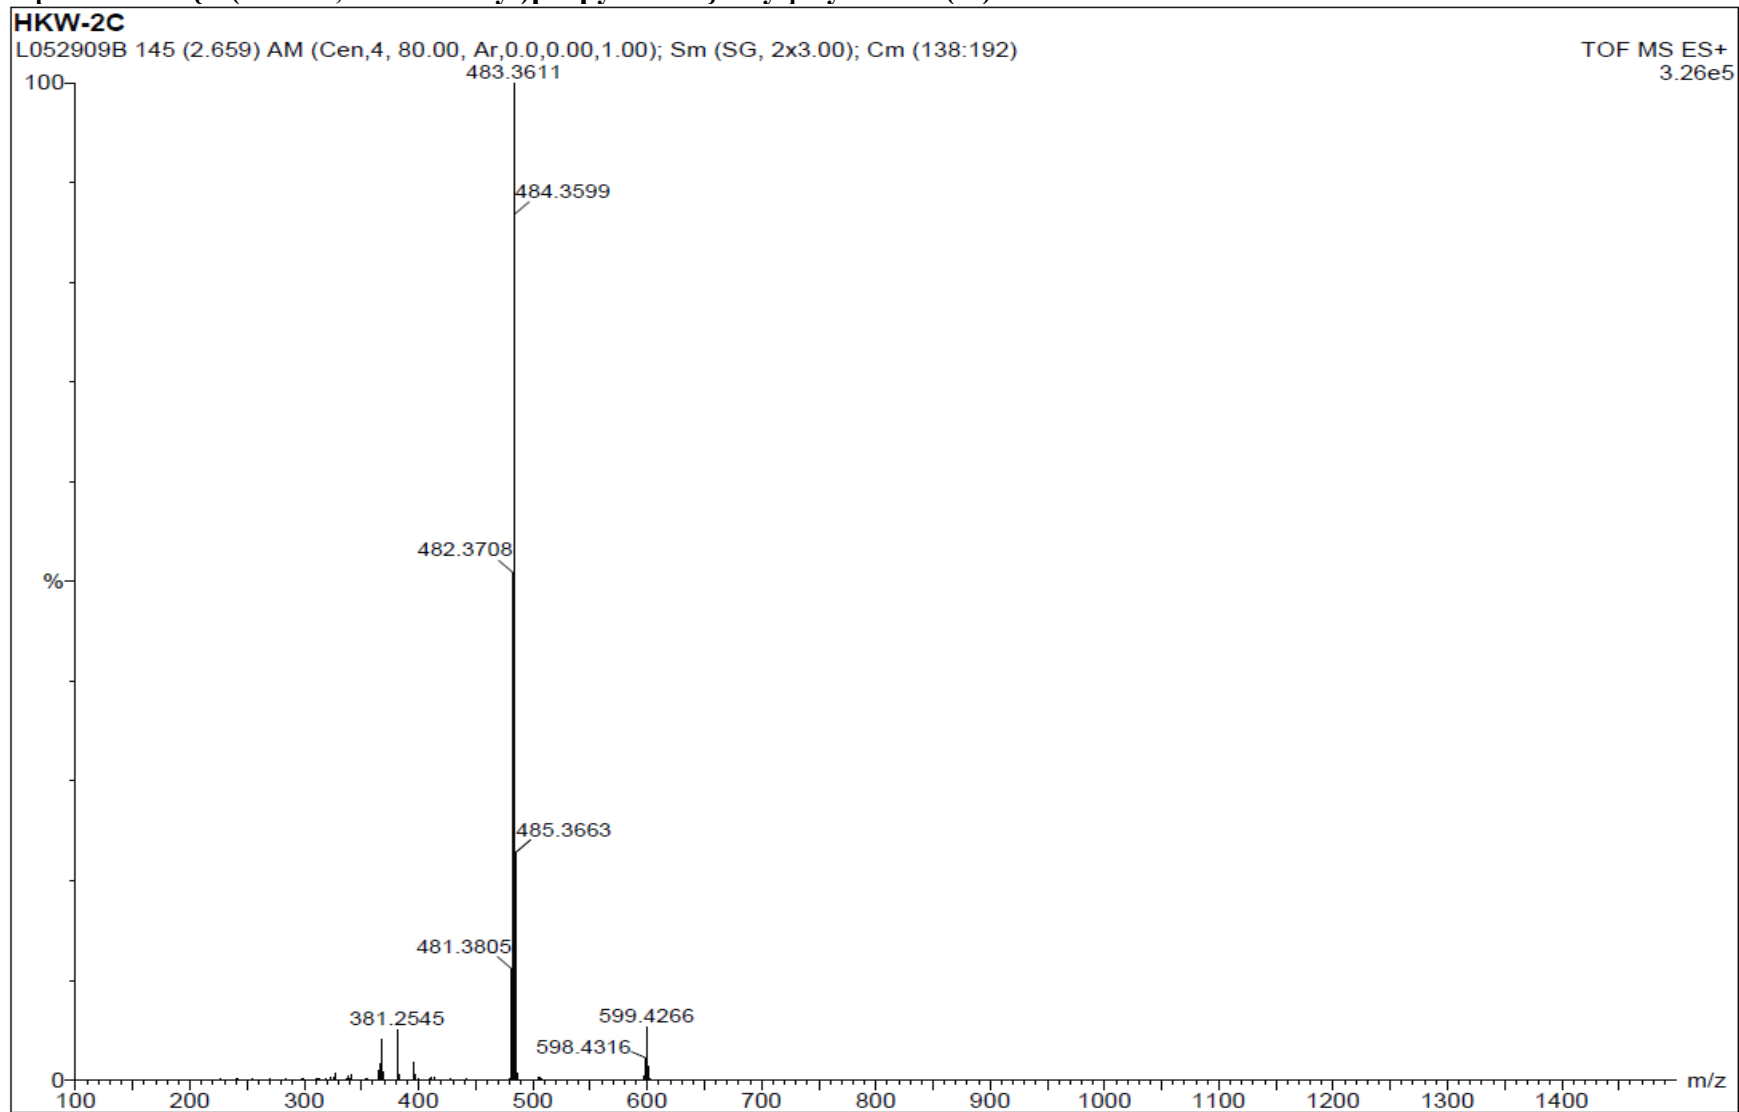

**3-[2-Imino-2-{3-(*closo*-1,7-carboranyl)propylamino}ethyl]thymidine (3f). Analytical traces in Water:Acetonitrile gradient**

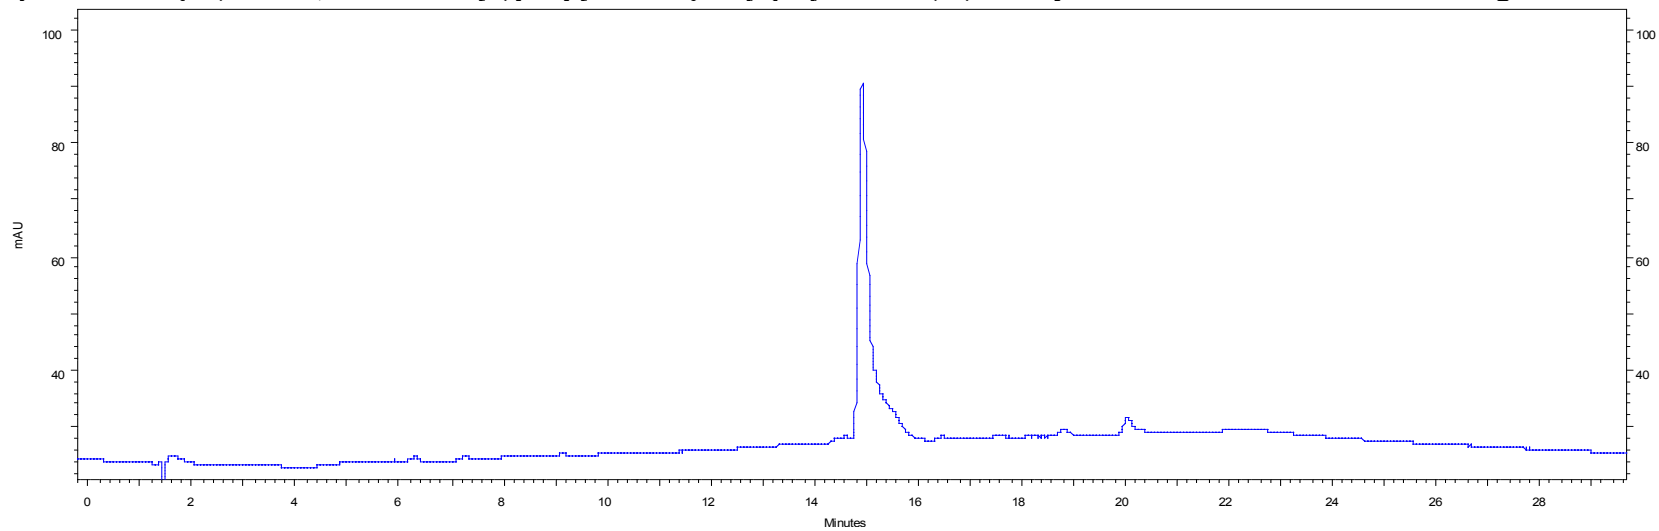

**Analytical traces in Water:Methanol gradient**

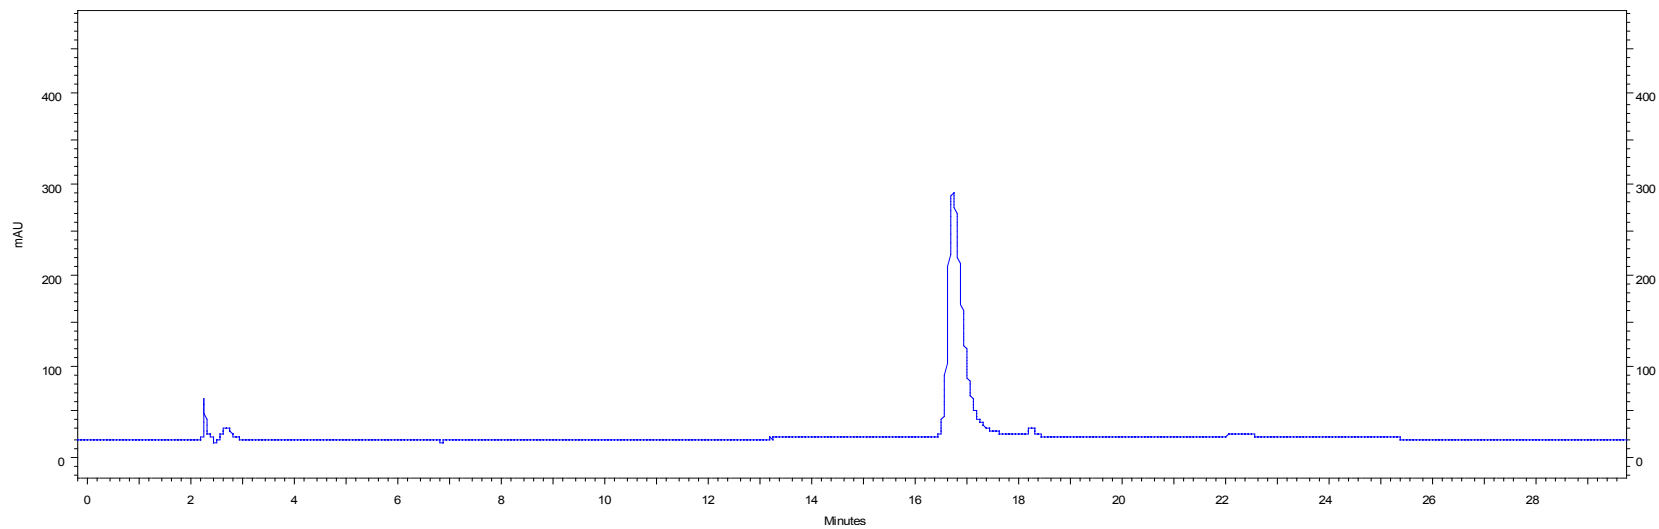

3',5'-(Di-*tert*-butyldimethylsilyl)-3-cyanothymidine (5). <sup>1</sup>H NMR

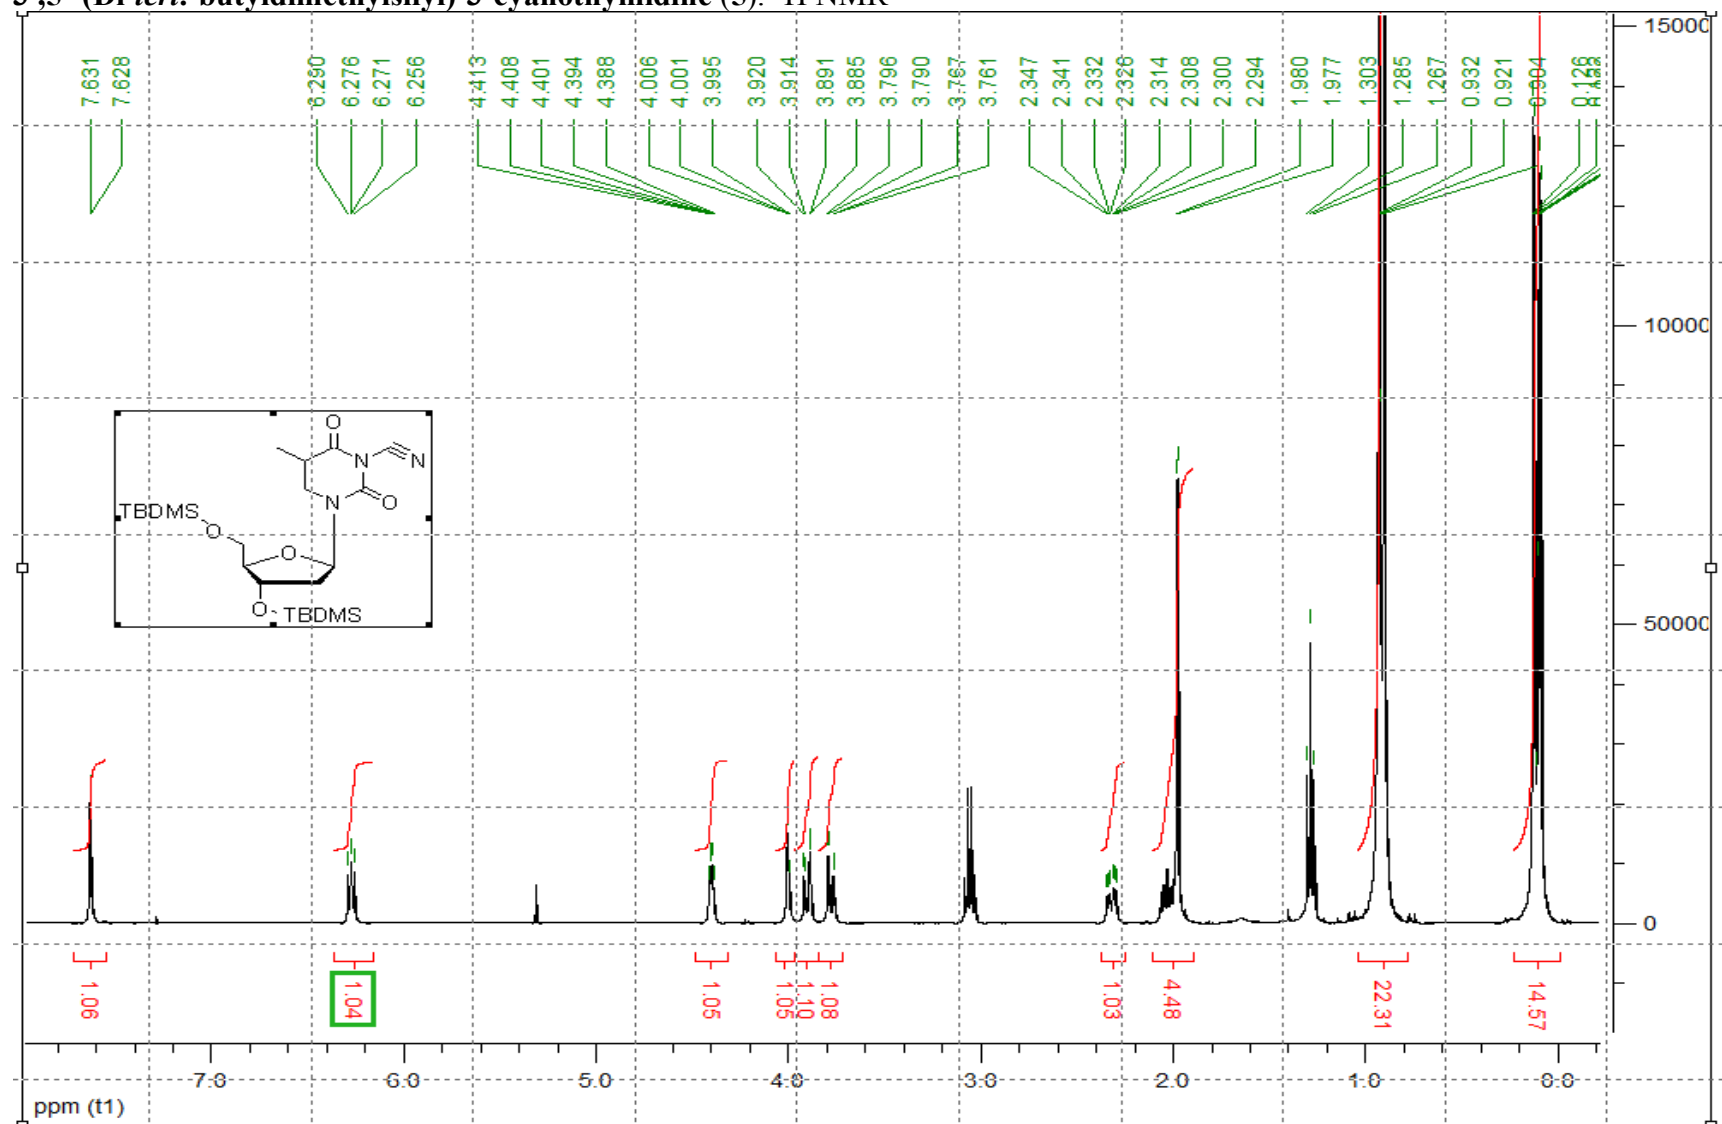

3',5'-(Di-*tert*-butyldimethylsilyl)-3-cyanothymidine (5). <sup>13</sup>C NMR

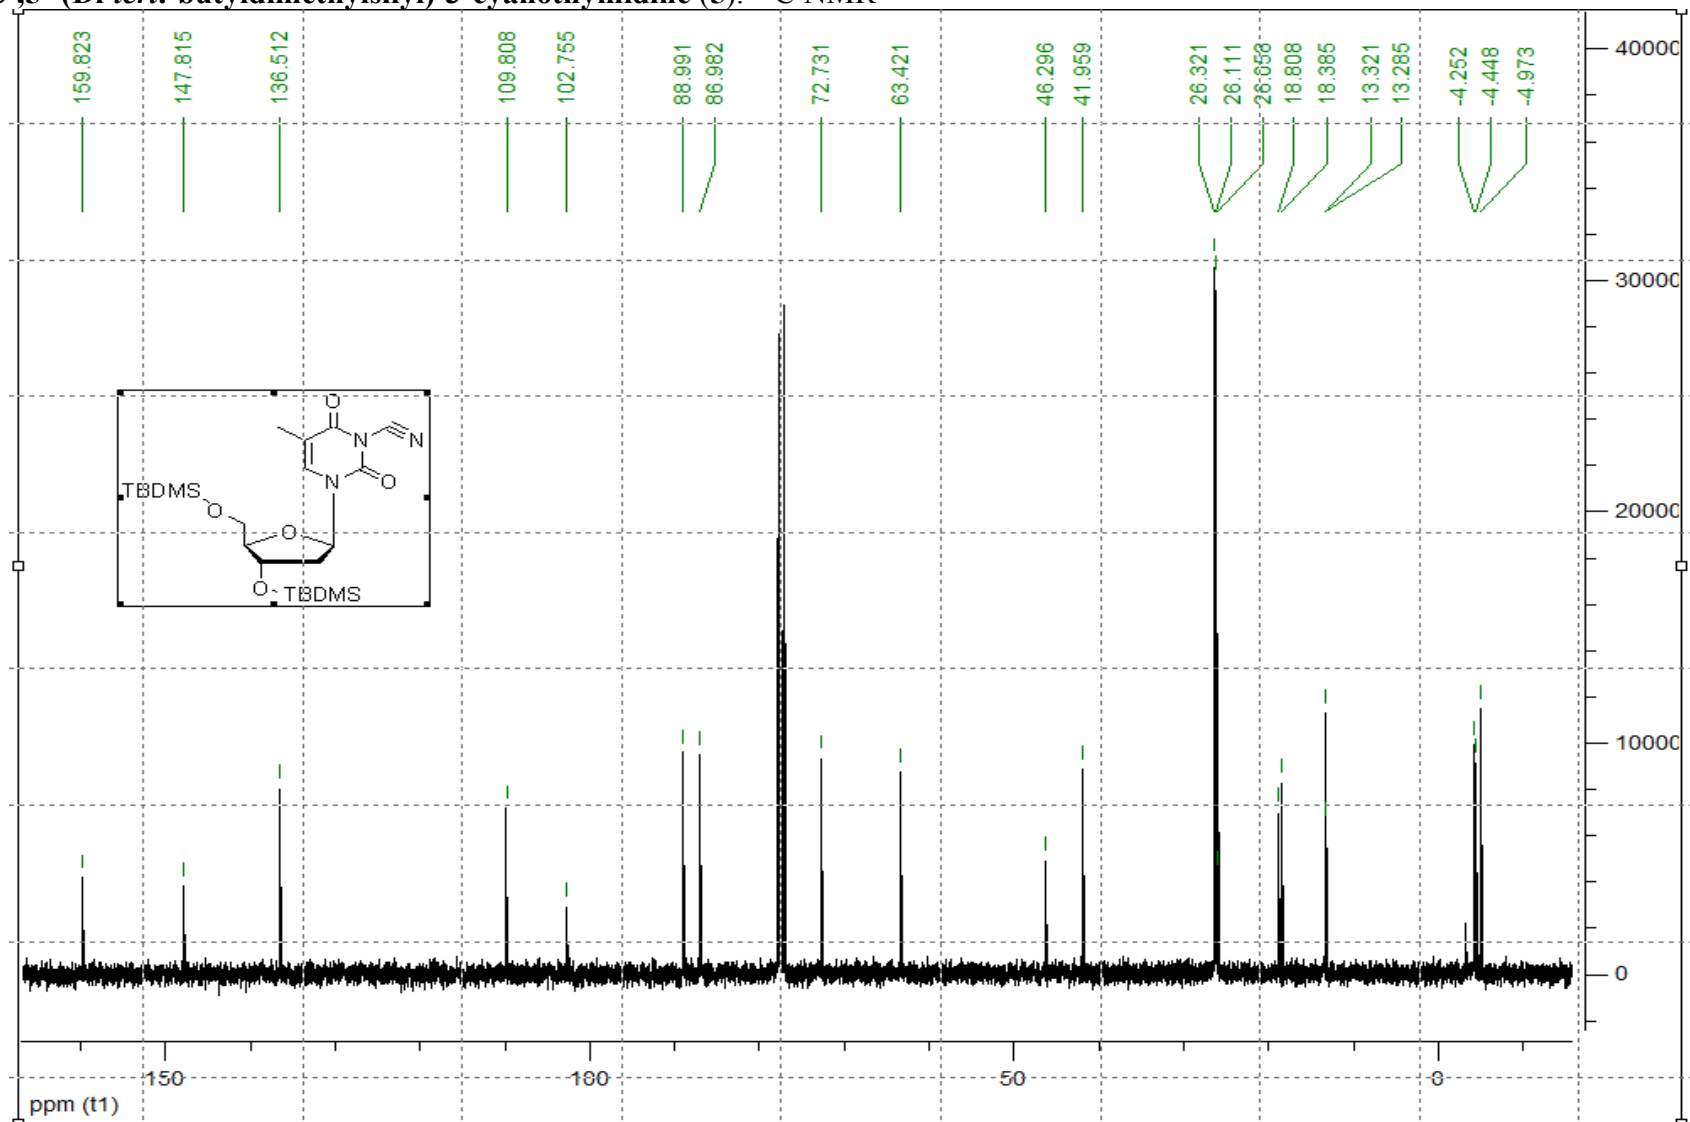



3',5'-(Di-*tert.*-butyldimethylsilyl)-3-cyanothymidine (5). IR-spectra

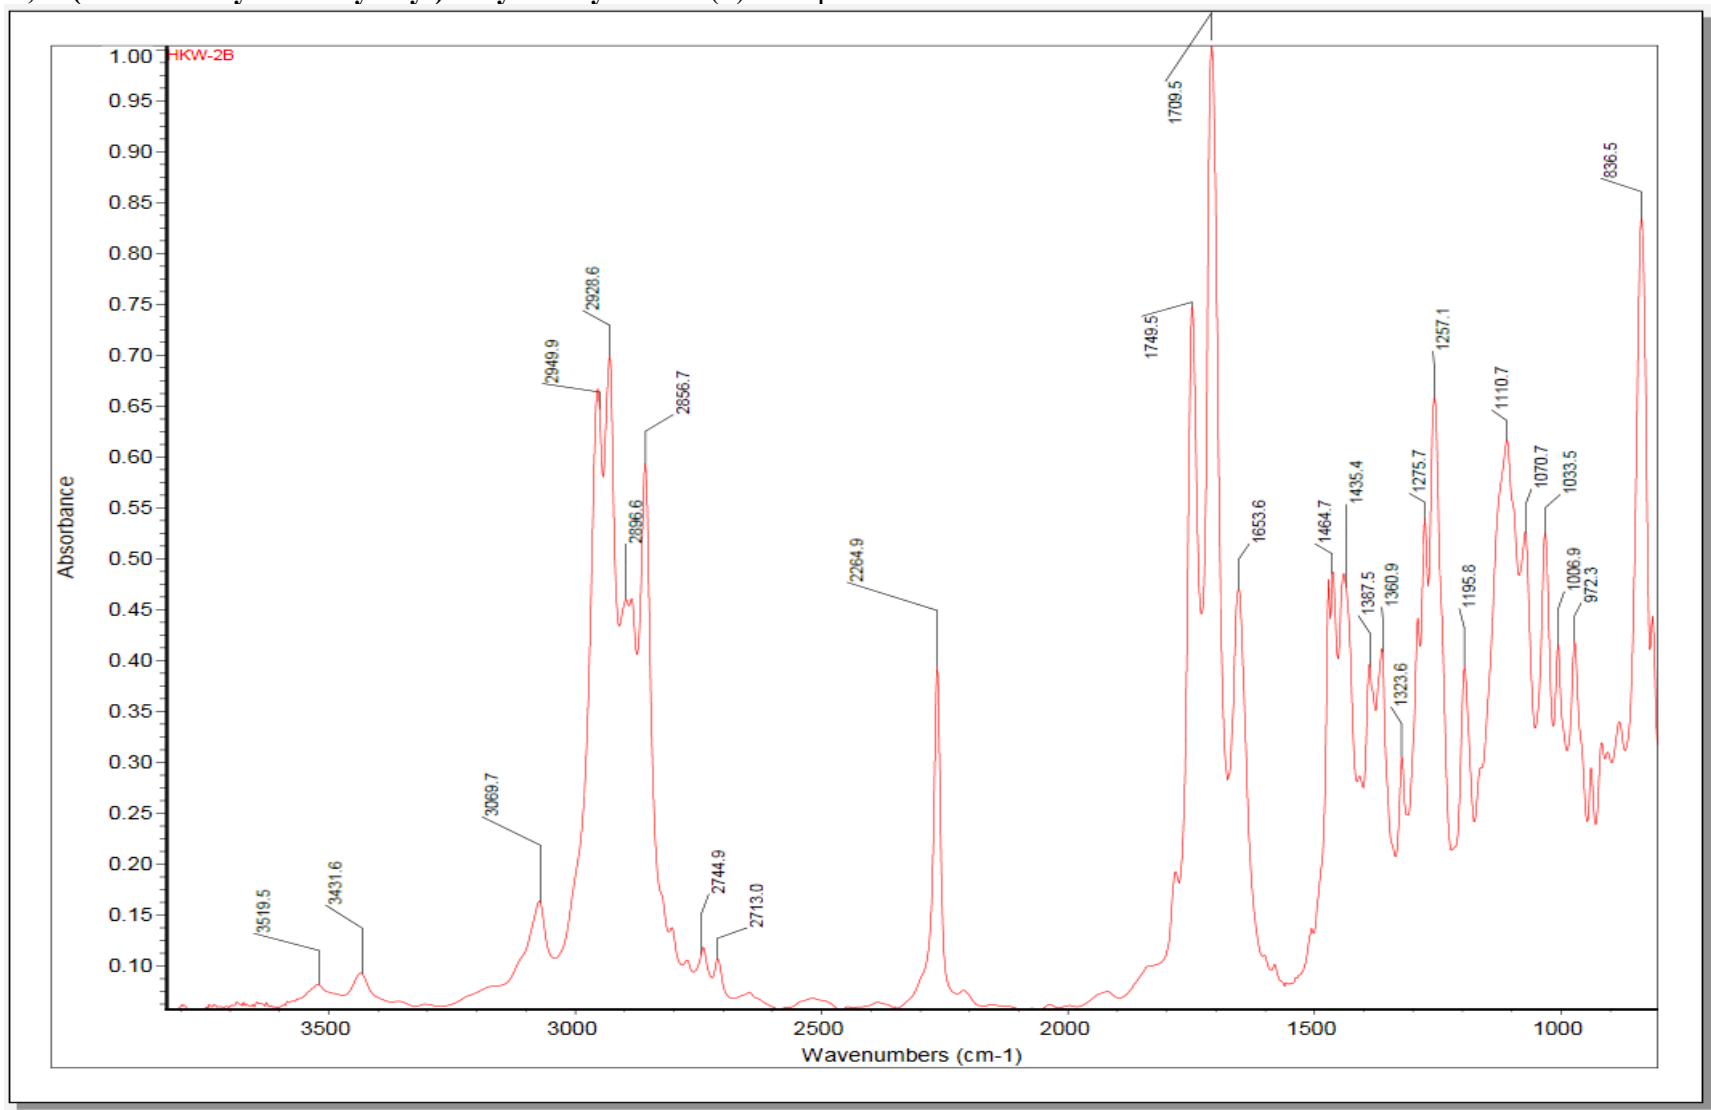

**3',5'-(Di-*tert*-butyldimethylsilyl)-3-cyanothymidine. (5).** HR-ESI-MS: 518.2462.

L071709E 337 (6.199) AM (Cen,4, 80.00, Ar,0.0,0.00,1.00); Sm (SG, 2x3.00); Cm (243:370)

TOF MS ES+  
1.89e5

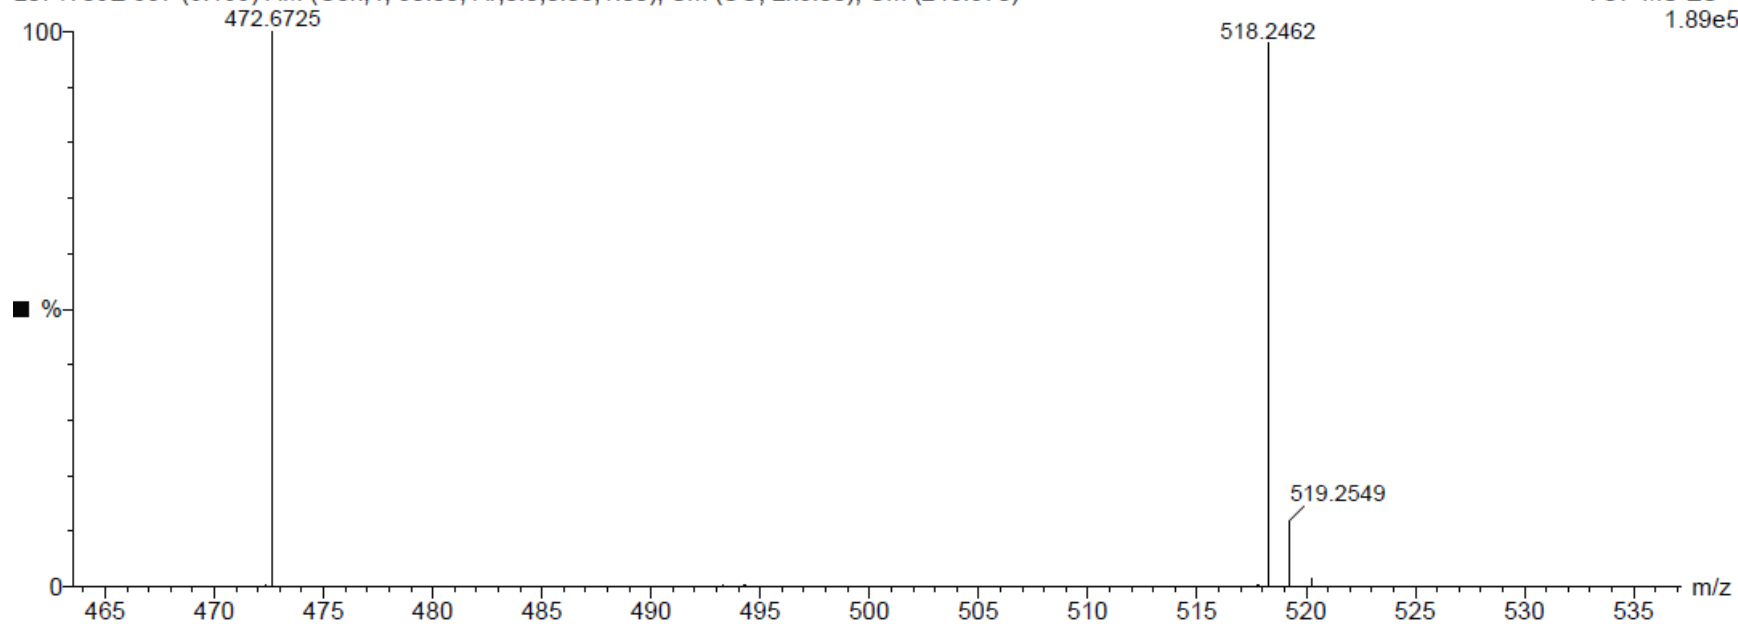

3-(Propylcarbamimidoyl)-3',5'-(di-*tert.*-butyldimethylsilyl)thymidine (6a). <sup>1</sup>H NMR

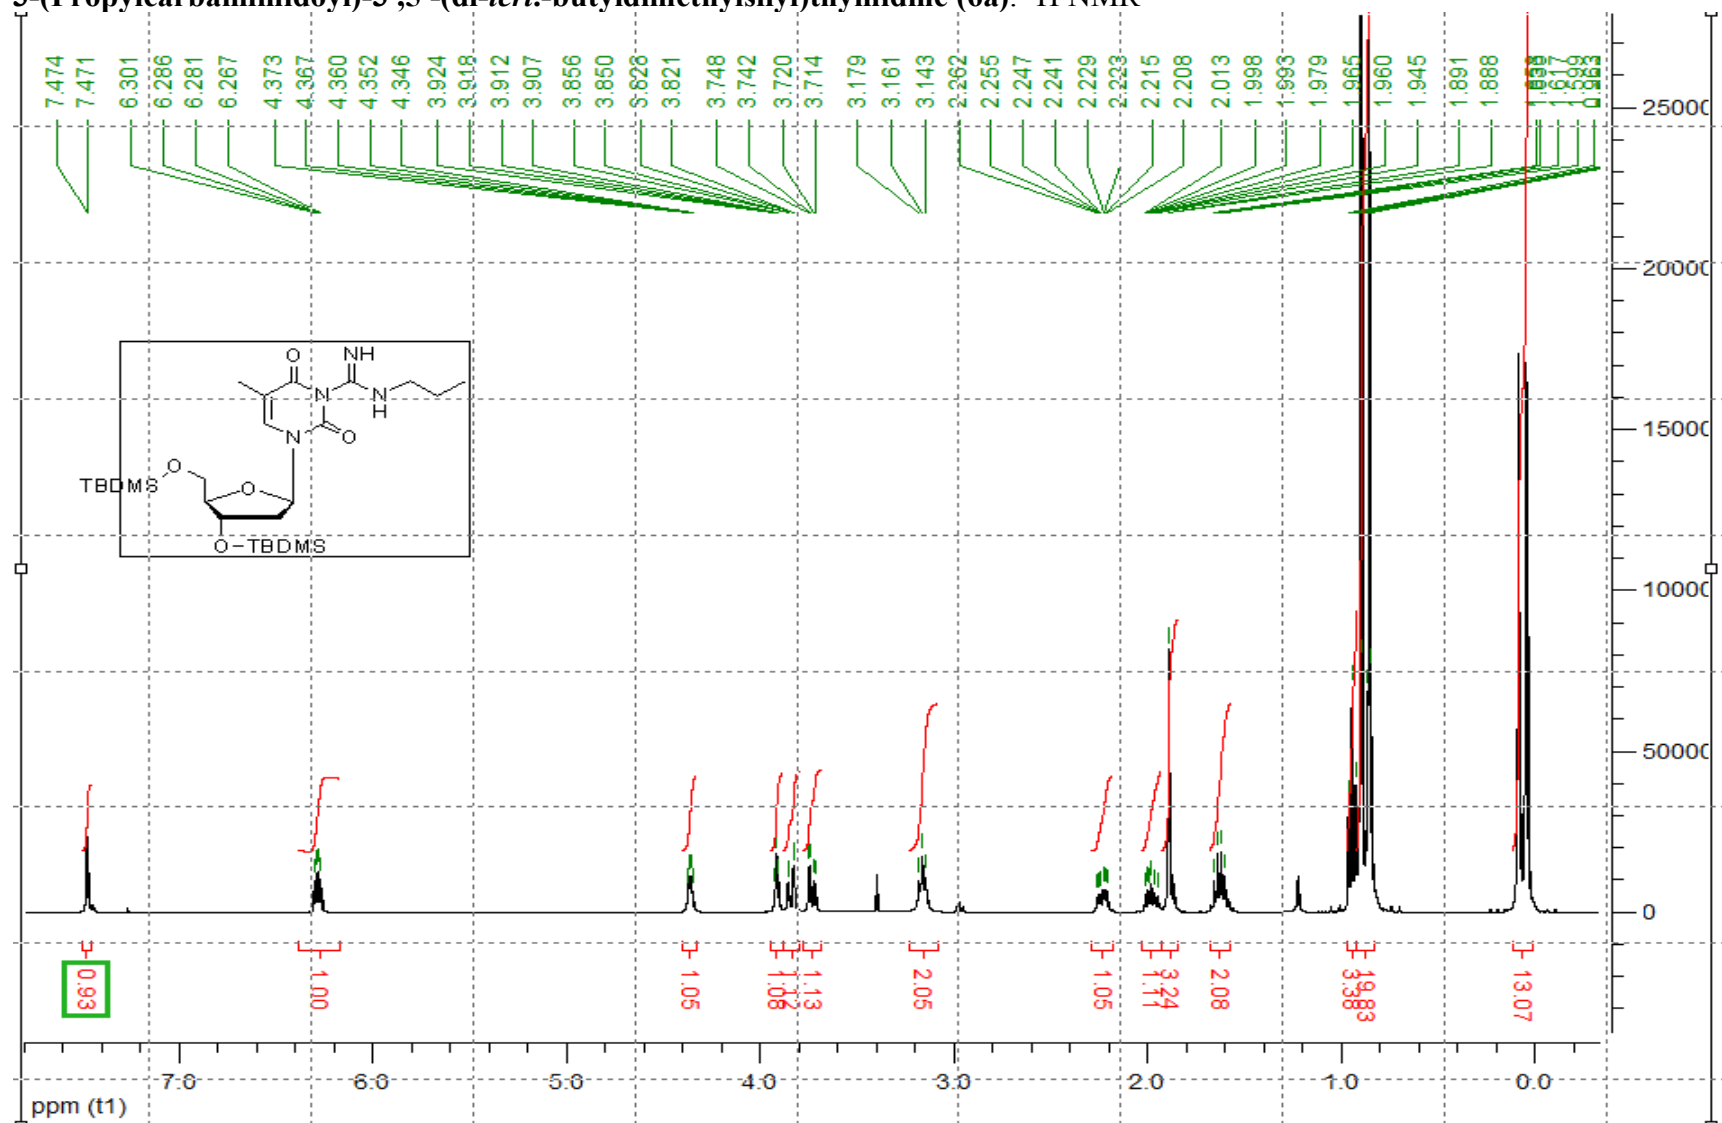

3-(Propylcarbamidoyl)-3',5'-(di-*tert*-butyldimethylsilyl)thymidine (6a). <sup>13</sup>C NMR

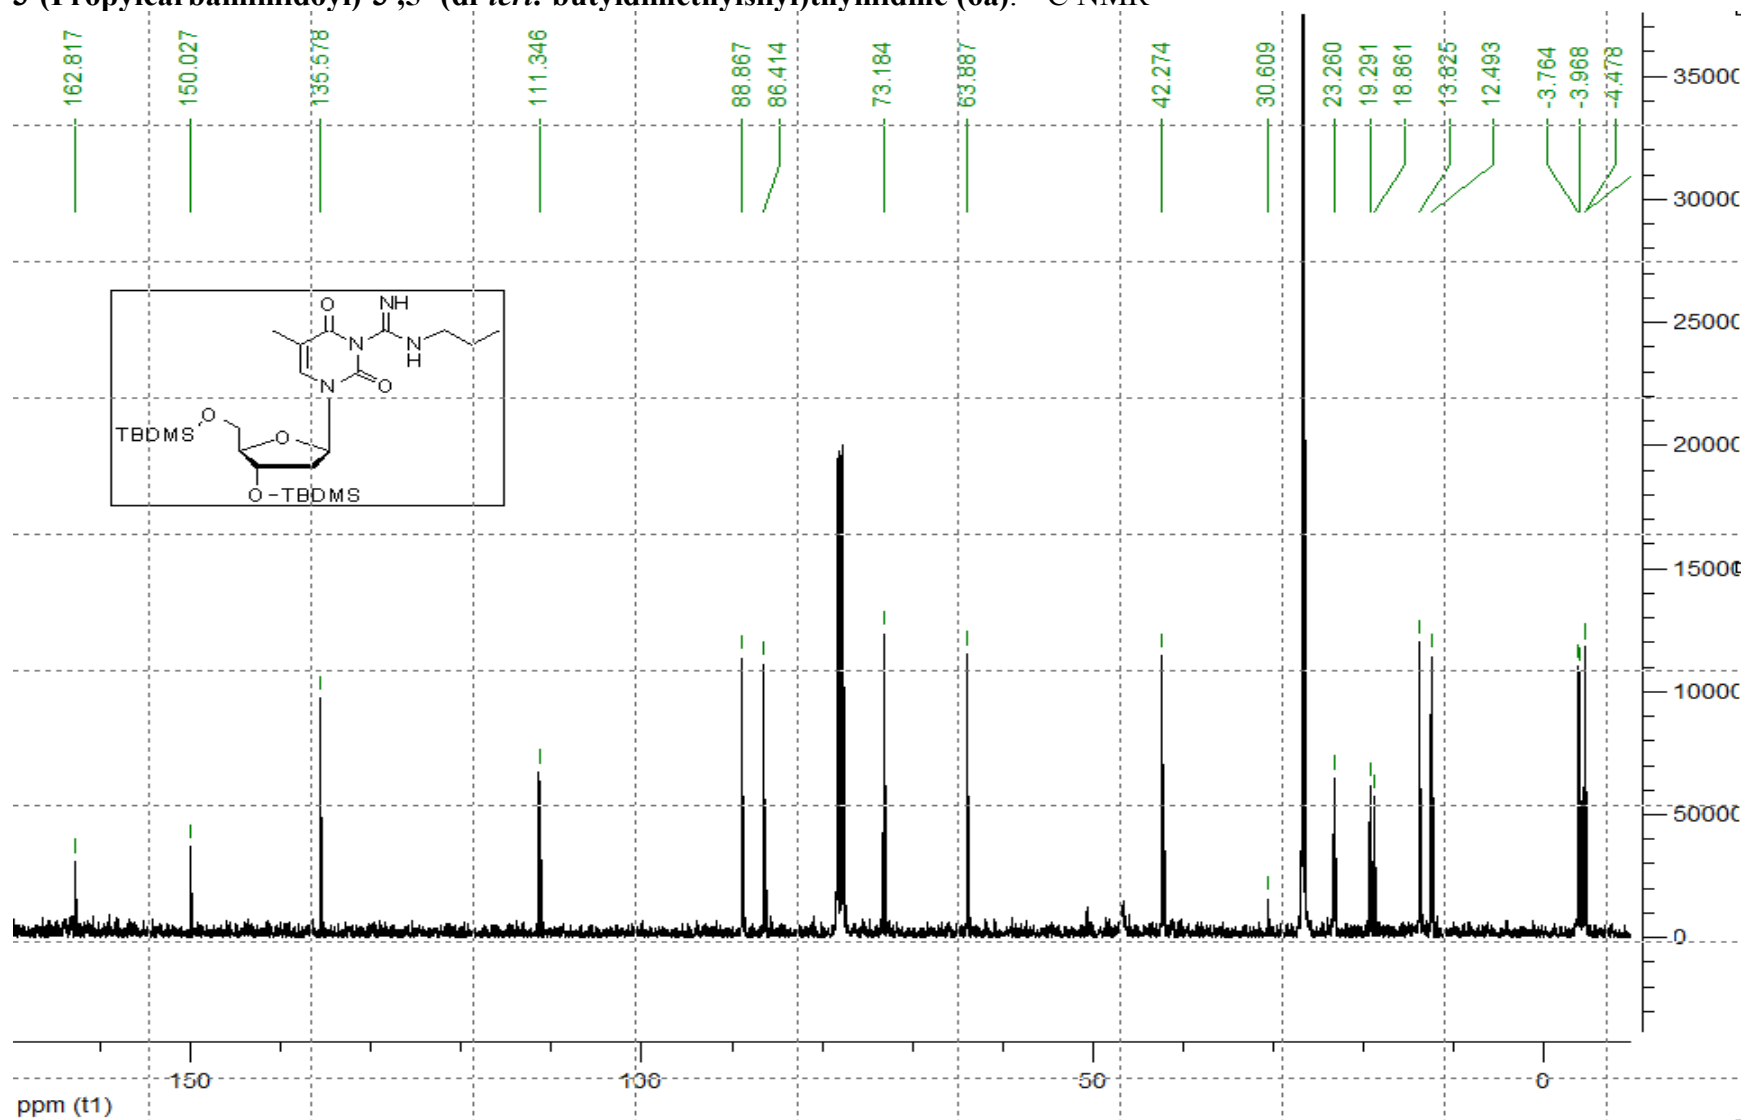

**3-(Propylcarbamiidoyl)-3',5'-(di-*tert.*-butyldimethylsilyl)thymidine (6a).** HR-ESI-MS found: 555.3376

L100109C 476 (8.731) AM (Cen,4, 80.00, Ar,5000.0,0.00,0.70); Sm (SG, 2x3.00); Cm (434:478)

TOF MS ES+  
1.43e6

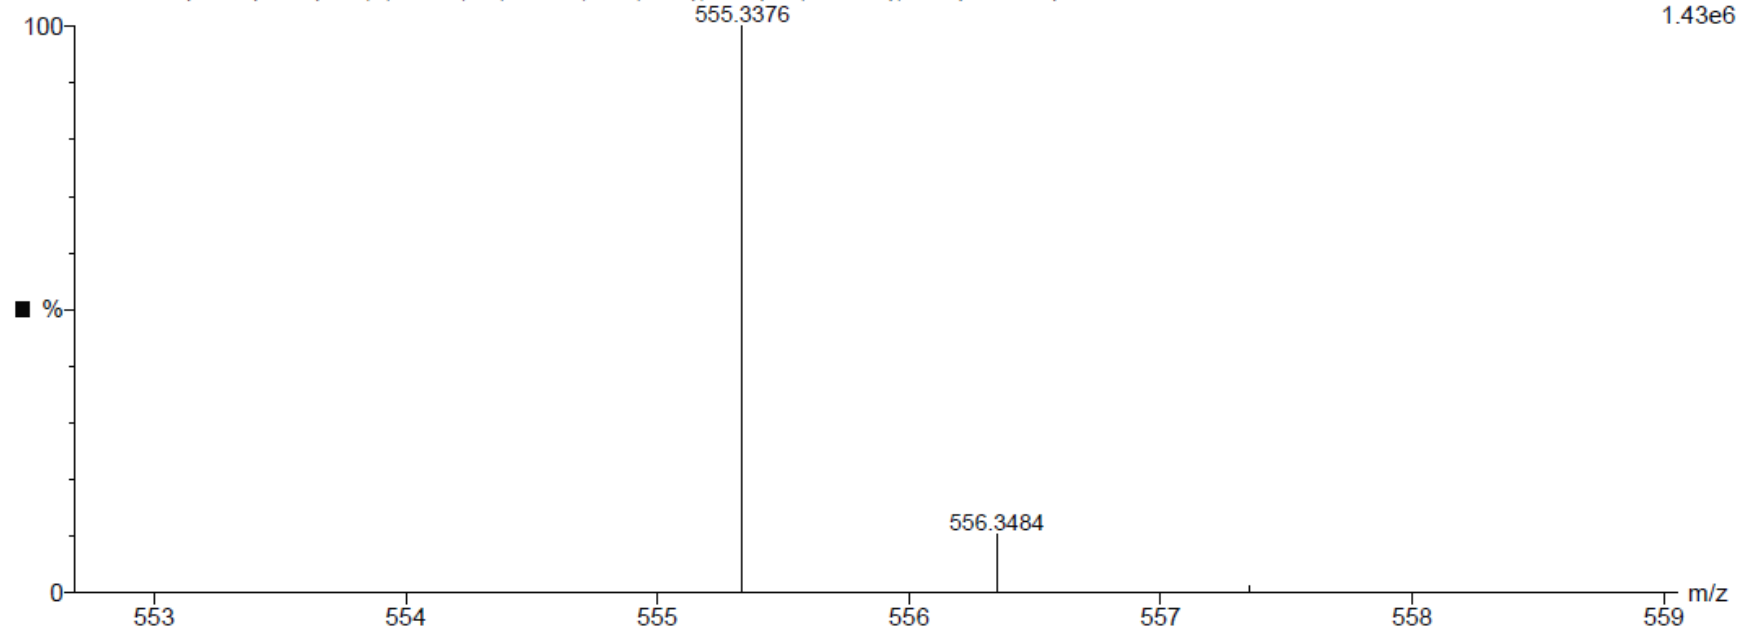

3-(Butylcarbamimidoyl)-3',5'-(di-*tert*.-butyldimethylsilyl)thymidine (6b). <sup>1</sup>H NMR

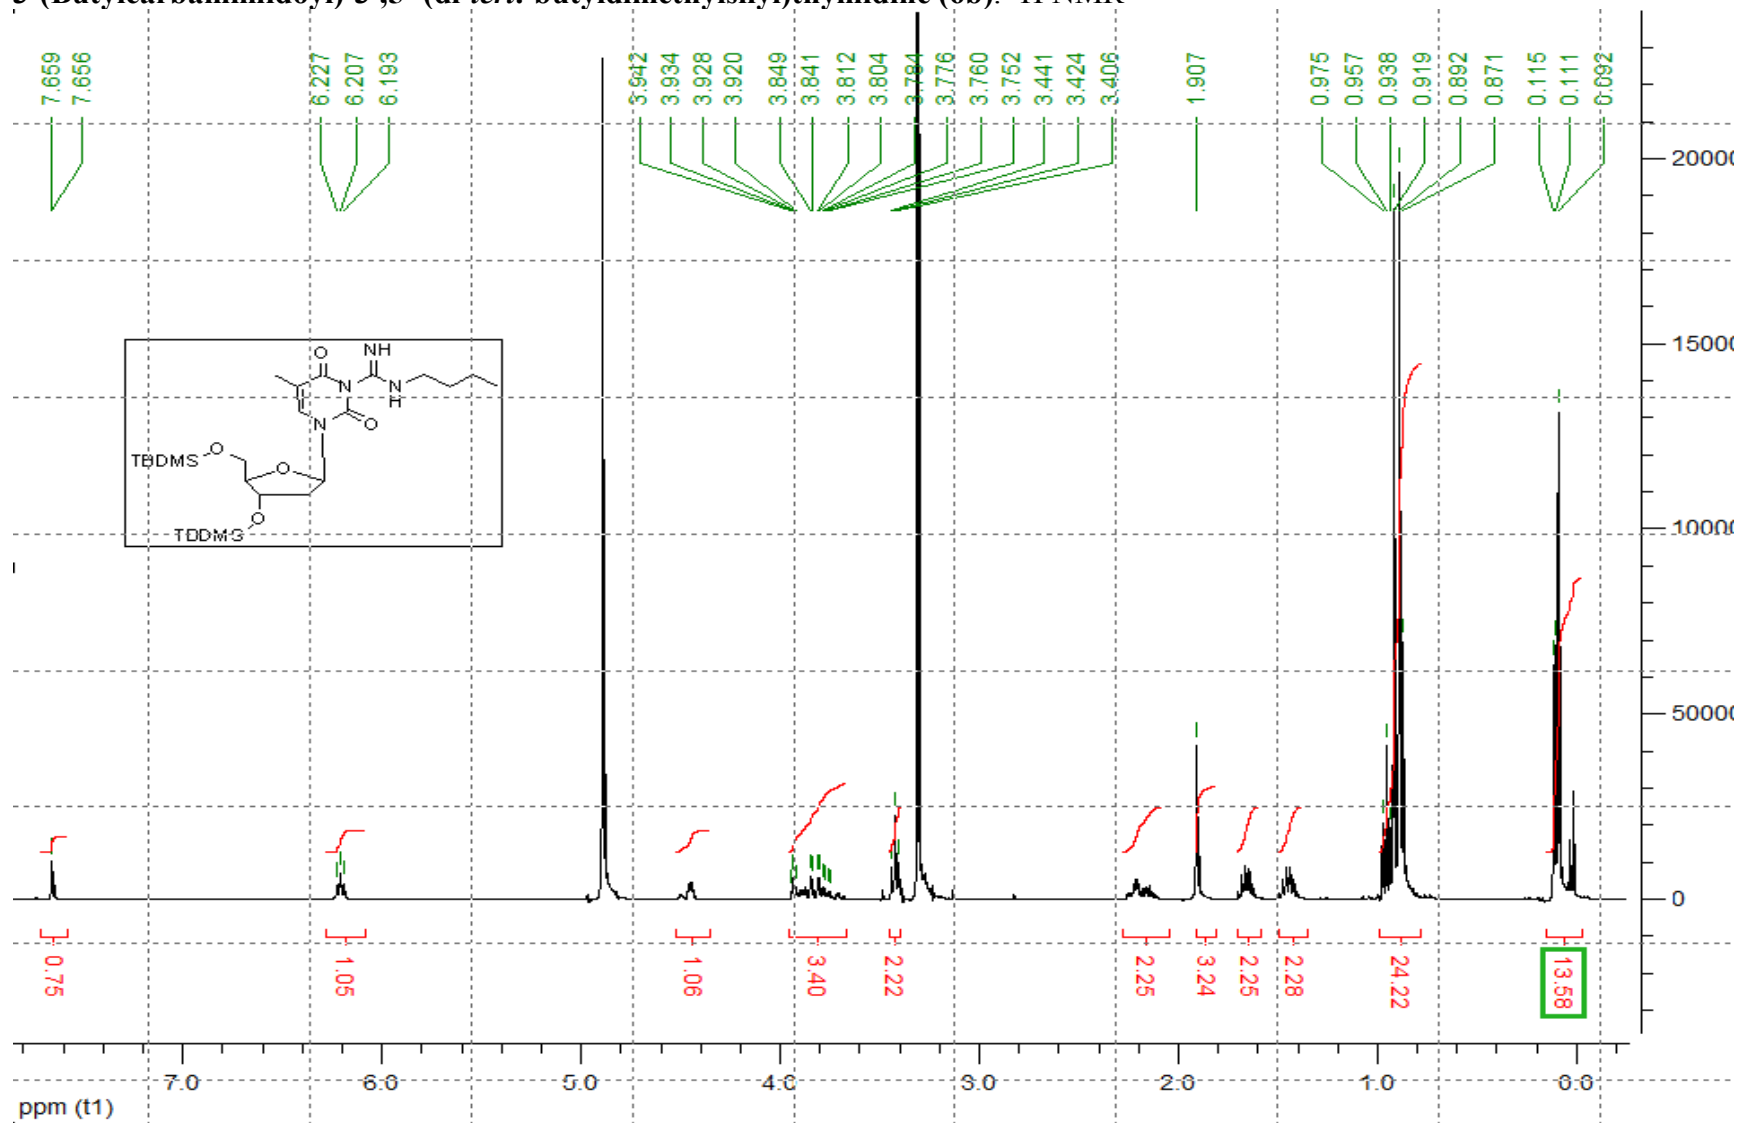

3-(Butylcarbamimidoyl)-3',5'-(di-*tert*-butyldimethylsilyl)thymidine (6b).  $^{13}\text{C}$  NMR

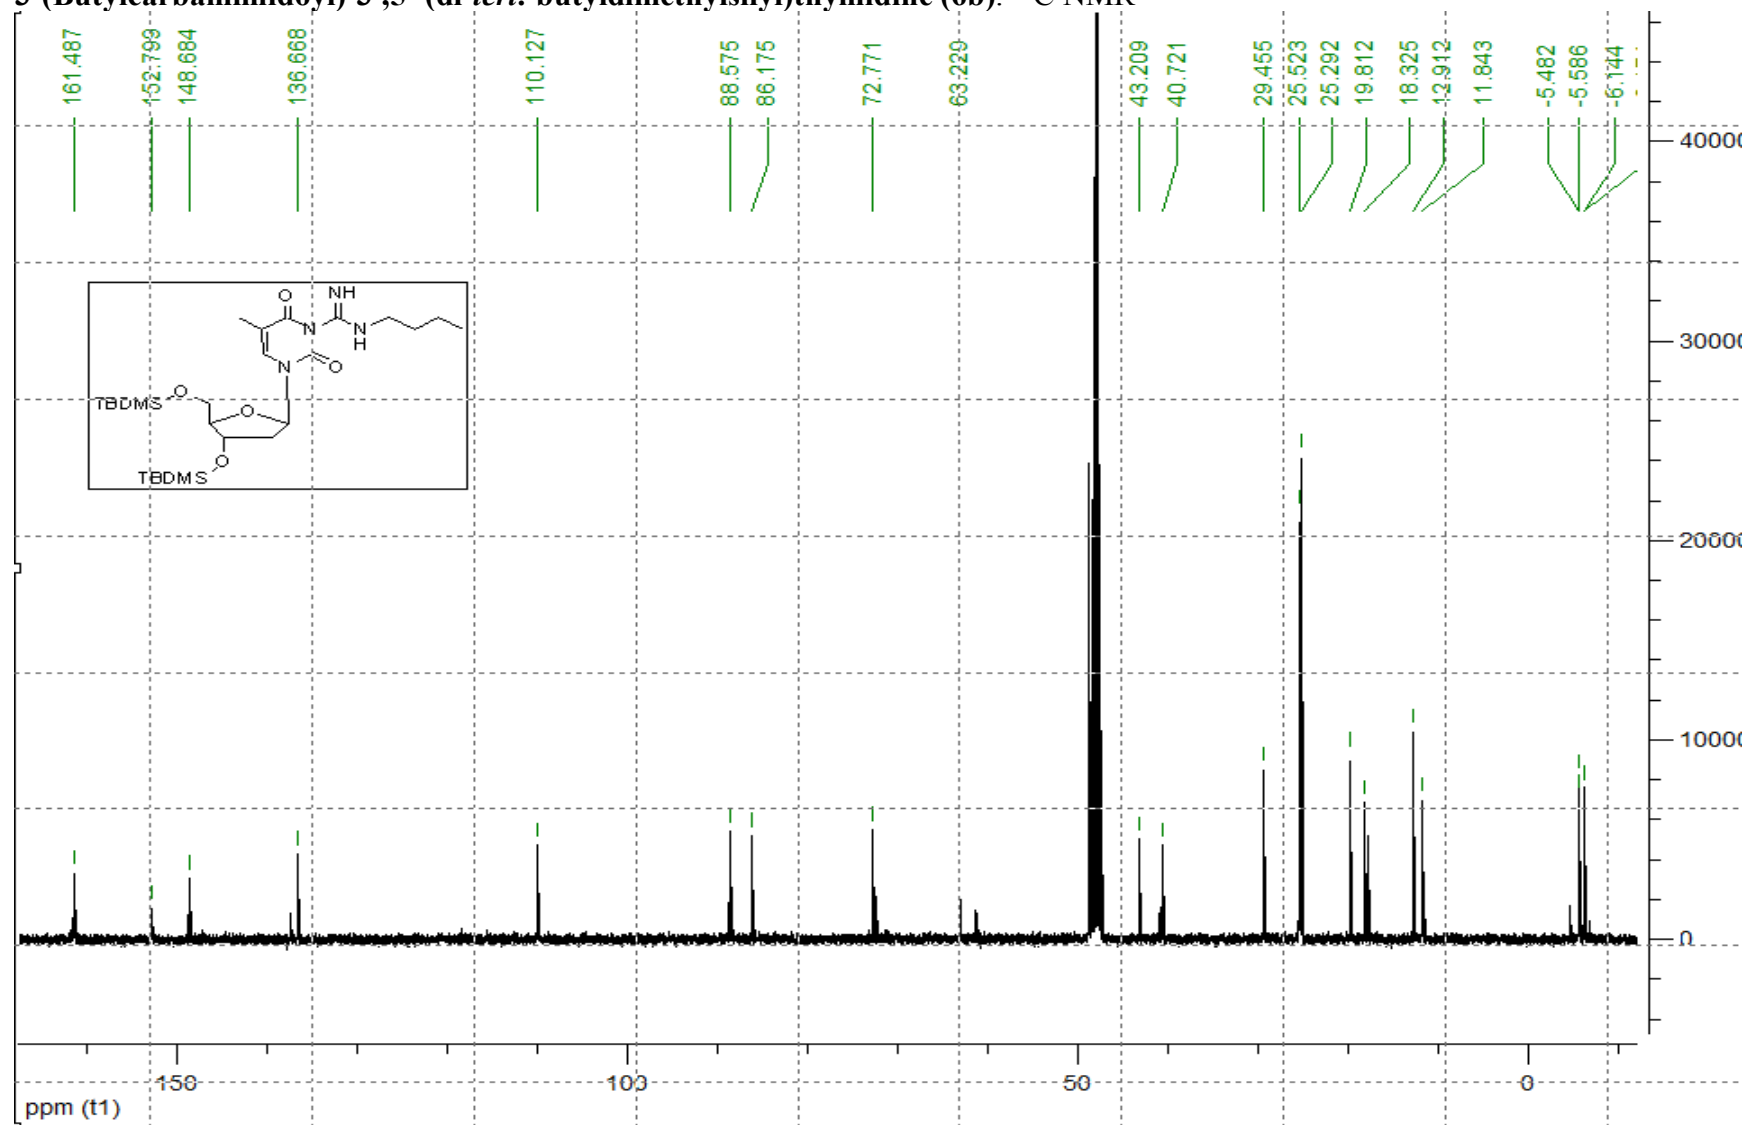

**3-(Butylcarbamimidoyl)-3',5'-(di-*tert*-butyldimethylsilyl)thymidine (6b).** HR-ESI-MS found: 569.3551 and 591.3370.

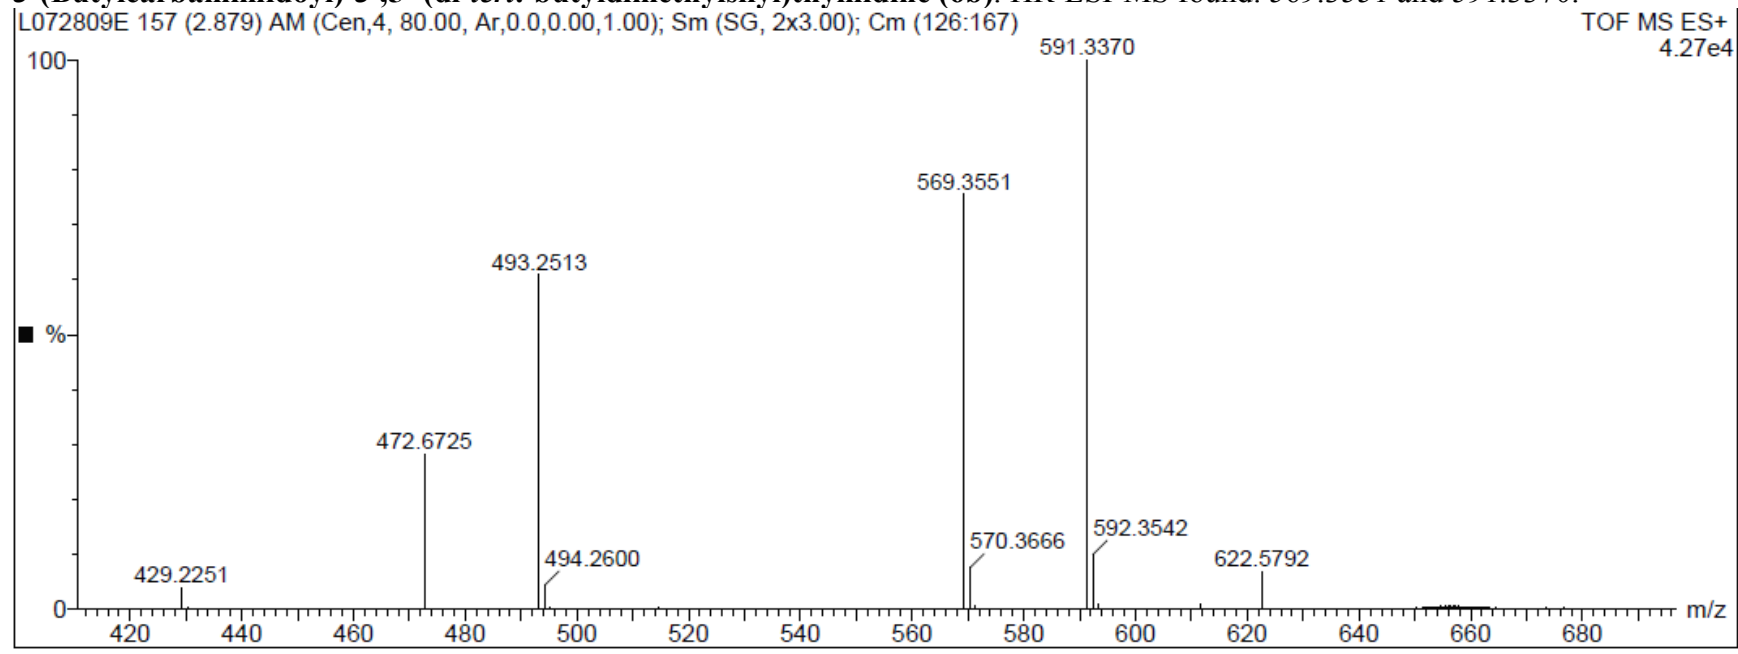



3-(Phenylcarbamimidoyl)-3',5'-(di-*tert*-butyldimethylsilyl)thymidine (6c). <sup>1</sup>H NMR

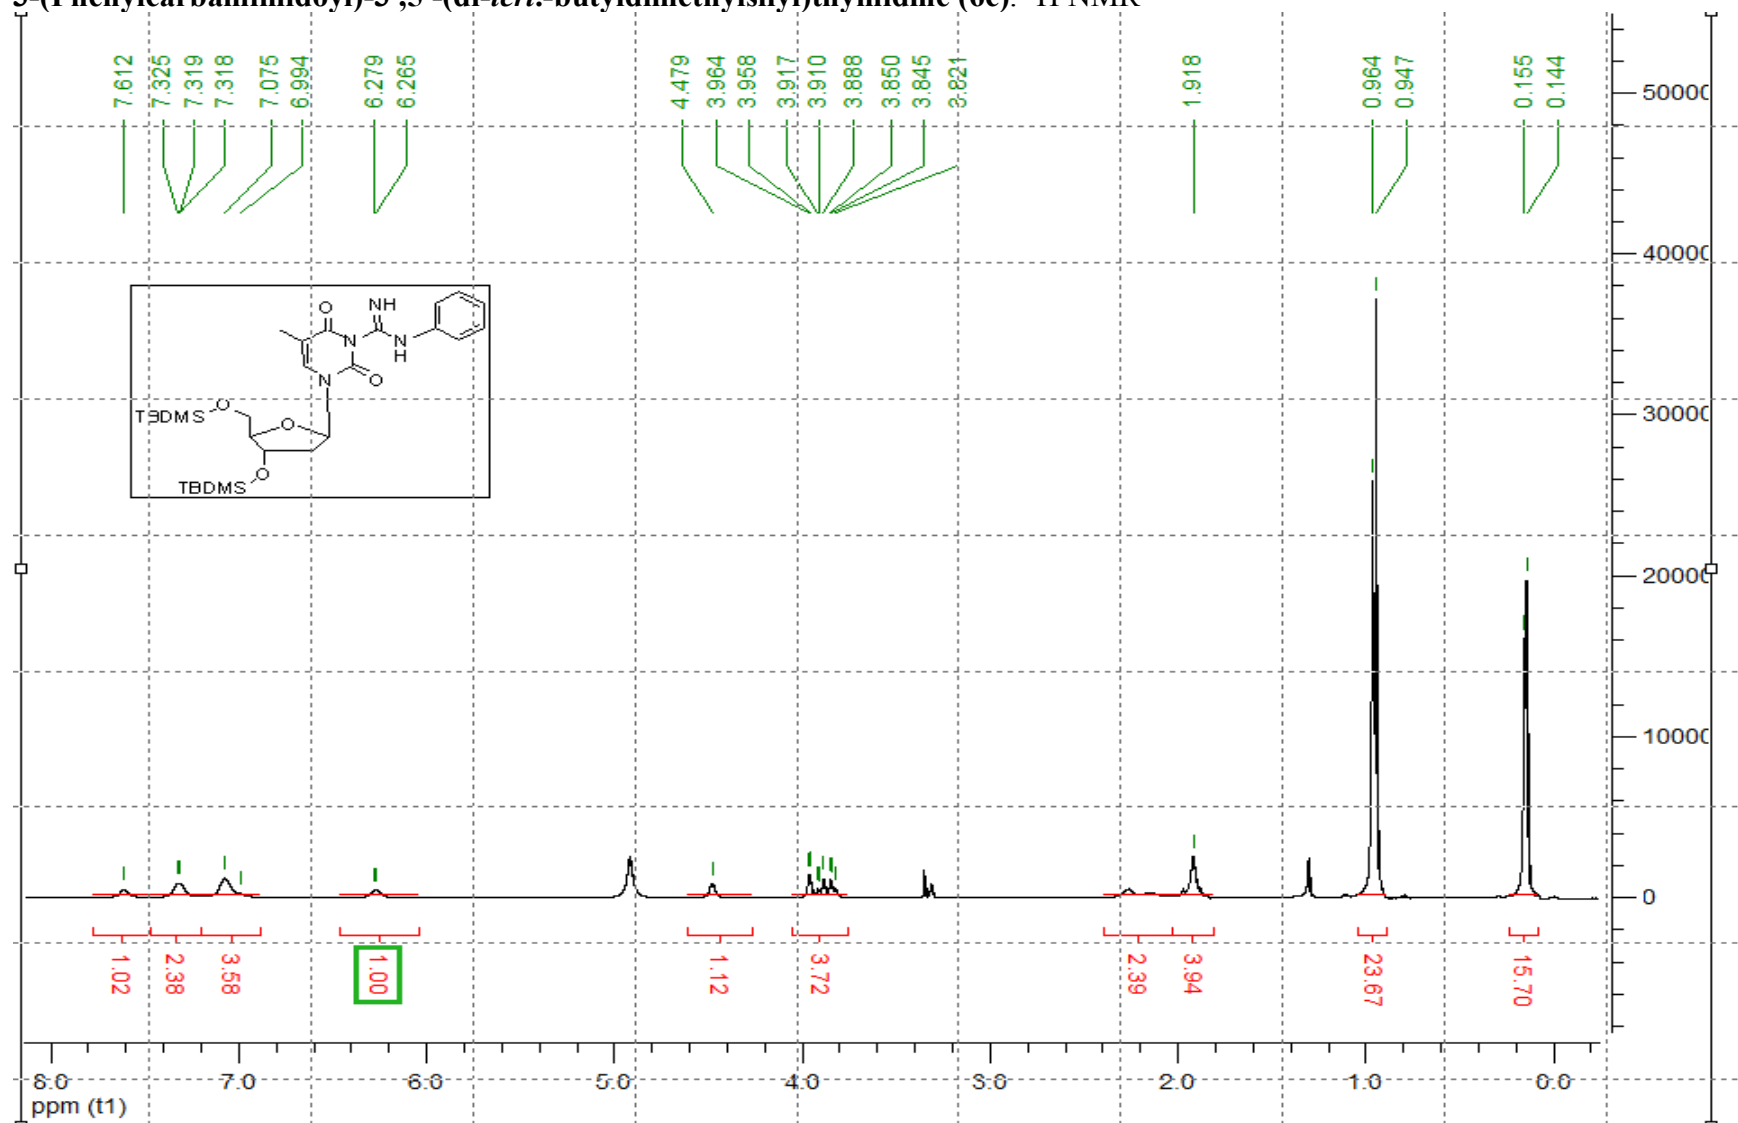

3-(Phenylcarbamidimidoyl)-3',5'-(di-*tert*-butyldimethylsilyl)thymidine (6c). <sup>13</sup>C NMR

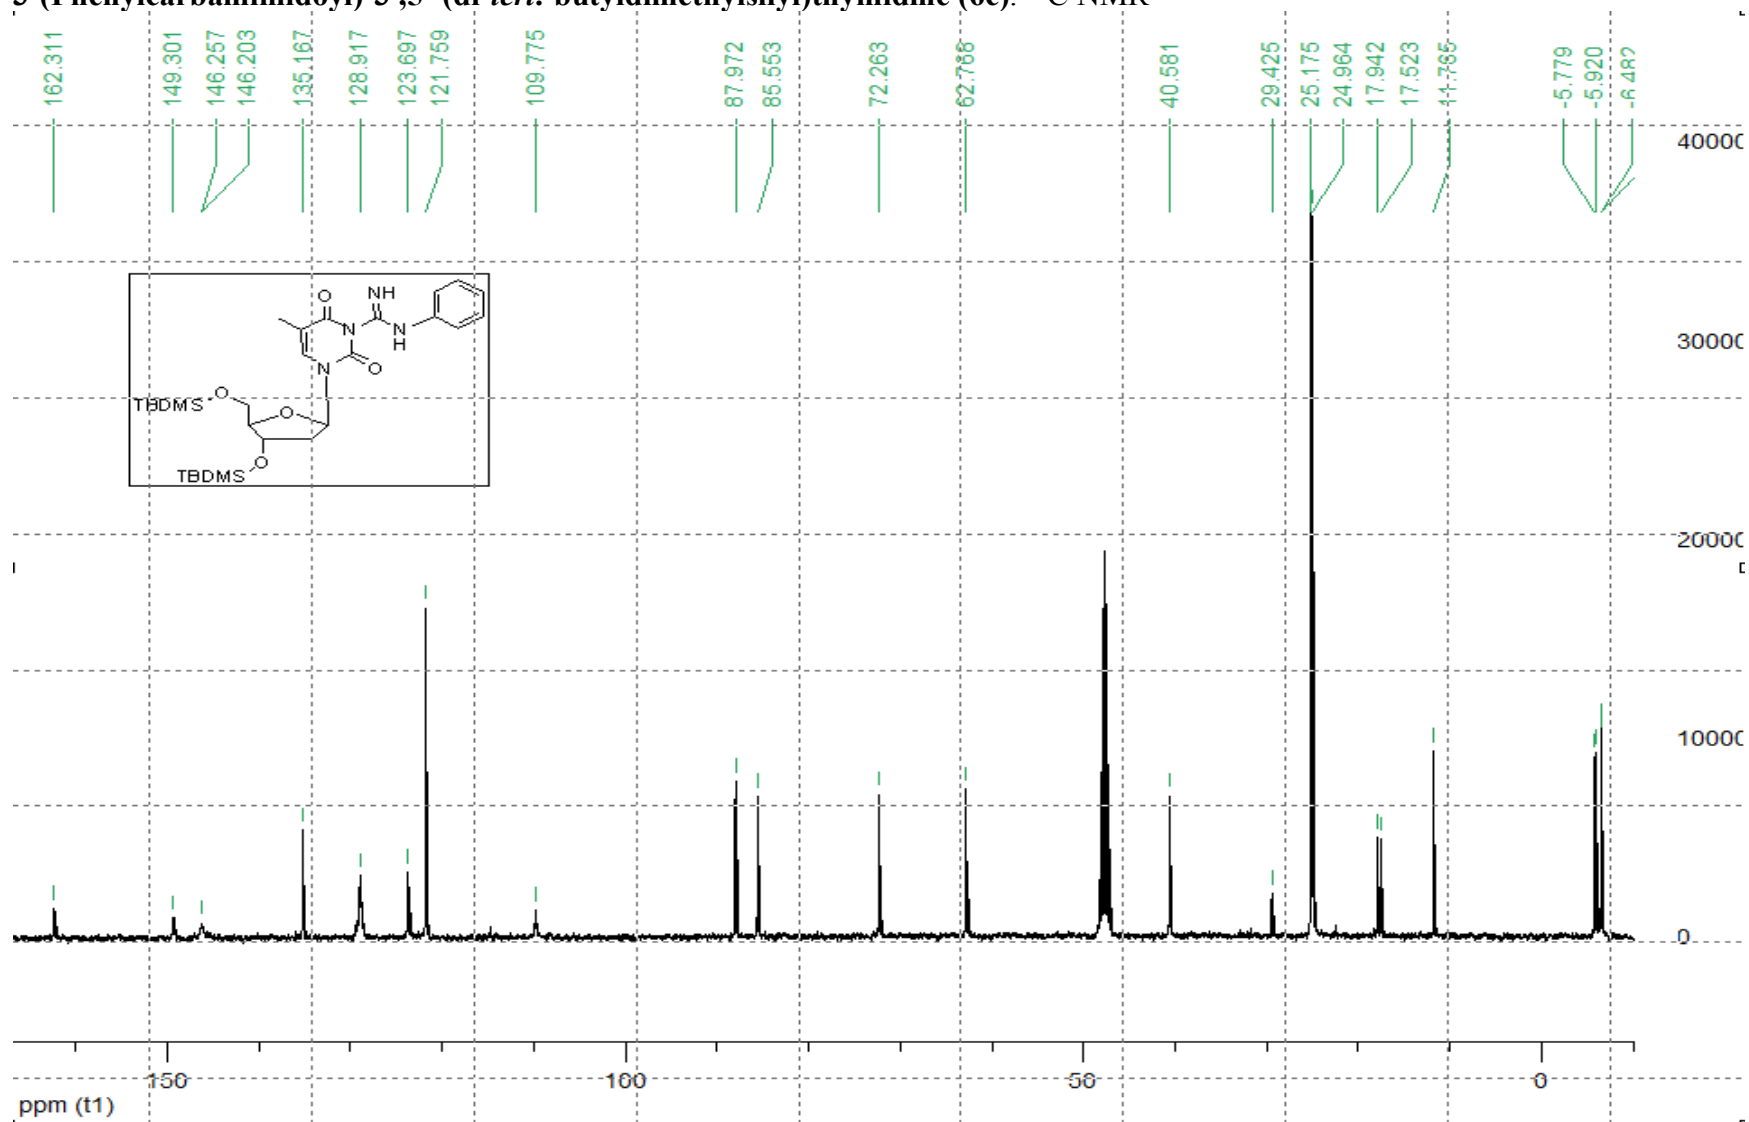

**3-(Phenylcarbamidoyl)-3',5'-(di-*tert*-butyldimethylsilyl)thymidine (6c).** HR-ESI-MS found: 589.3251.

L090209F 80 (1.485) AM (Cen,4, 80.00, Ar,5000.0,0.00,0.70); Sm (SG, 2x3.00); Cm (25:182)

TOF MS ES+  
8.84e5

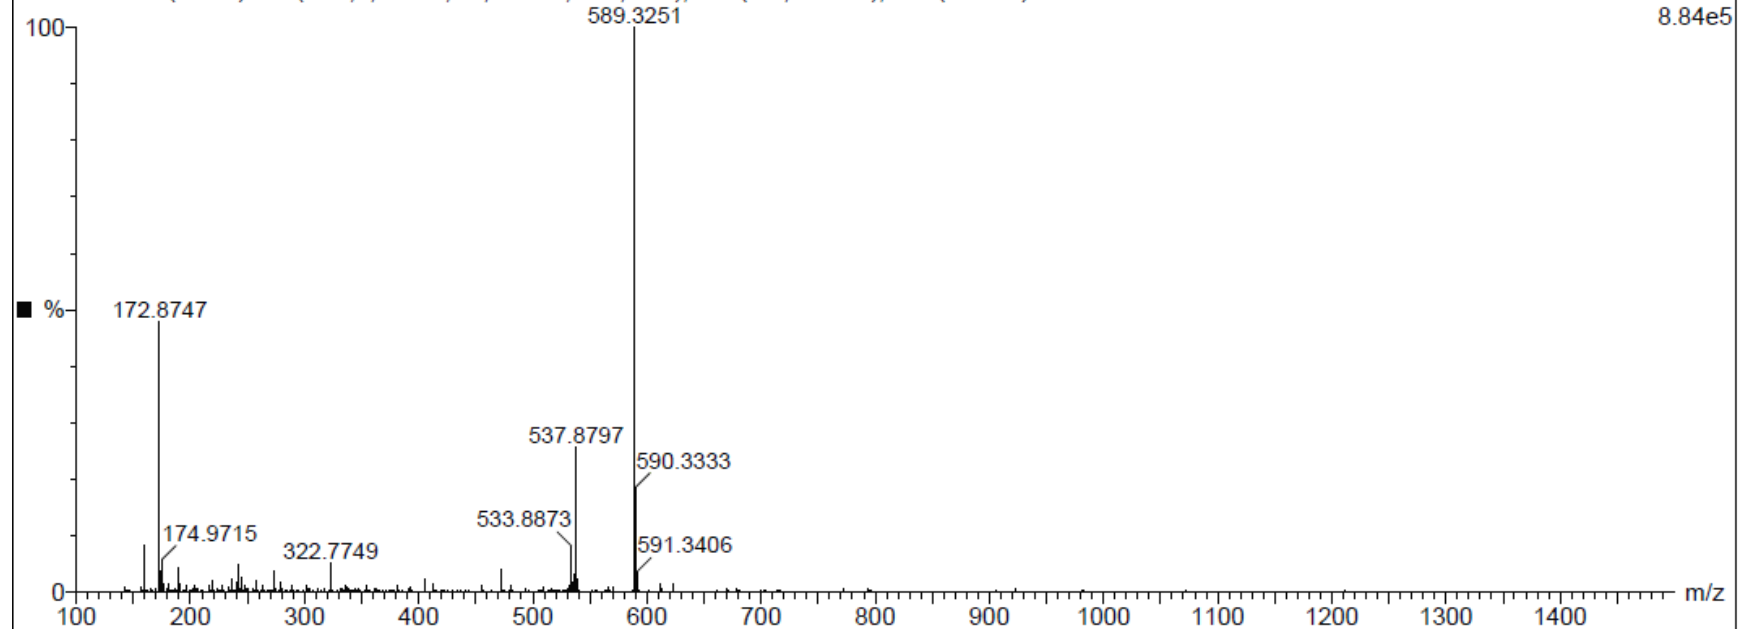

3-(Benzylcarbamidoyl)-3',5'-(di-*tert*-butyldimethylsilyl)thymidine (6d). <sup>1</sup>H NMR

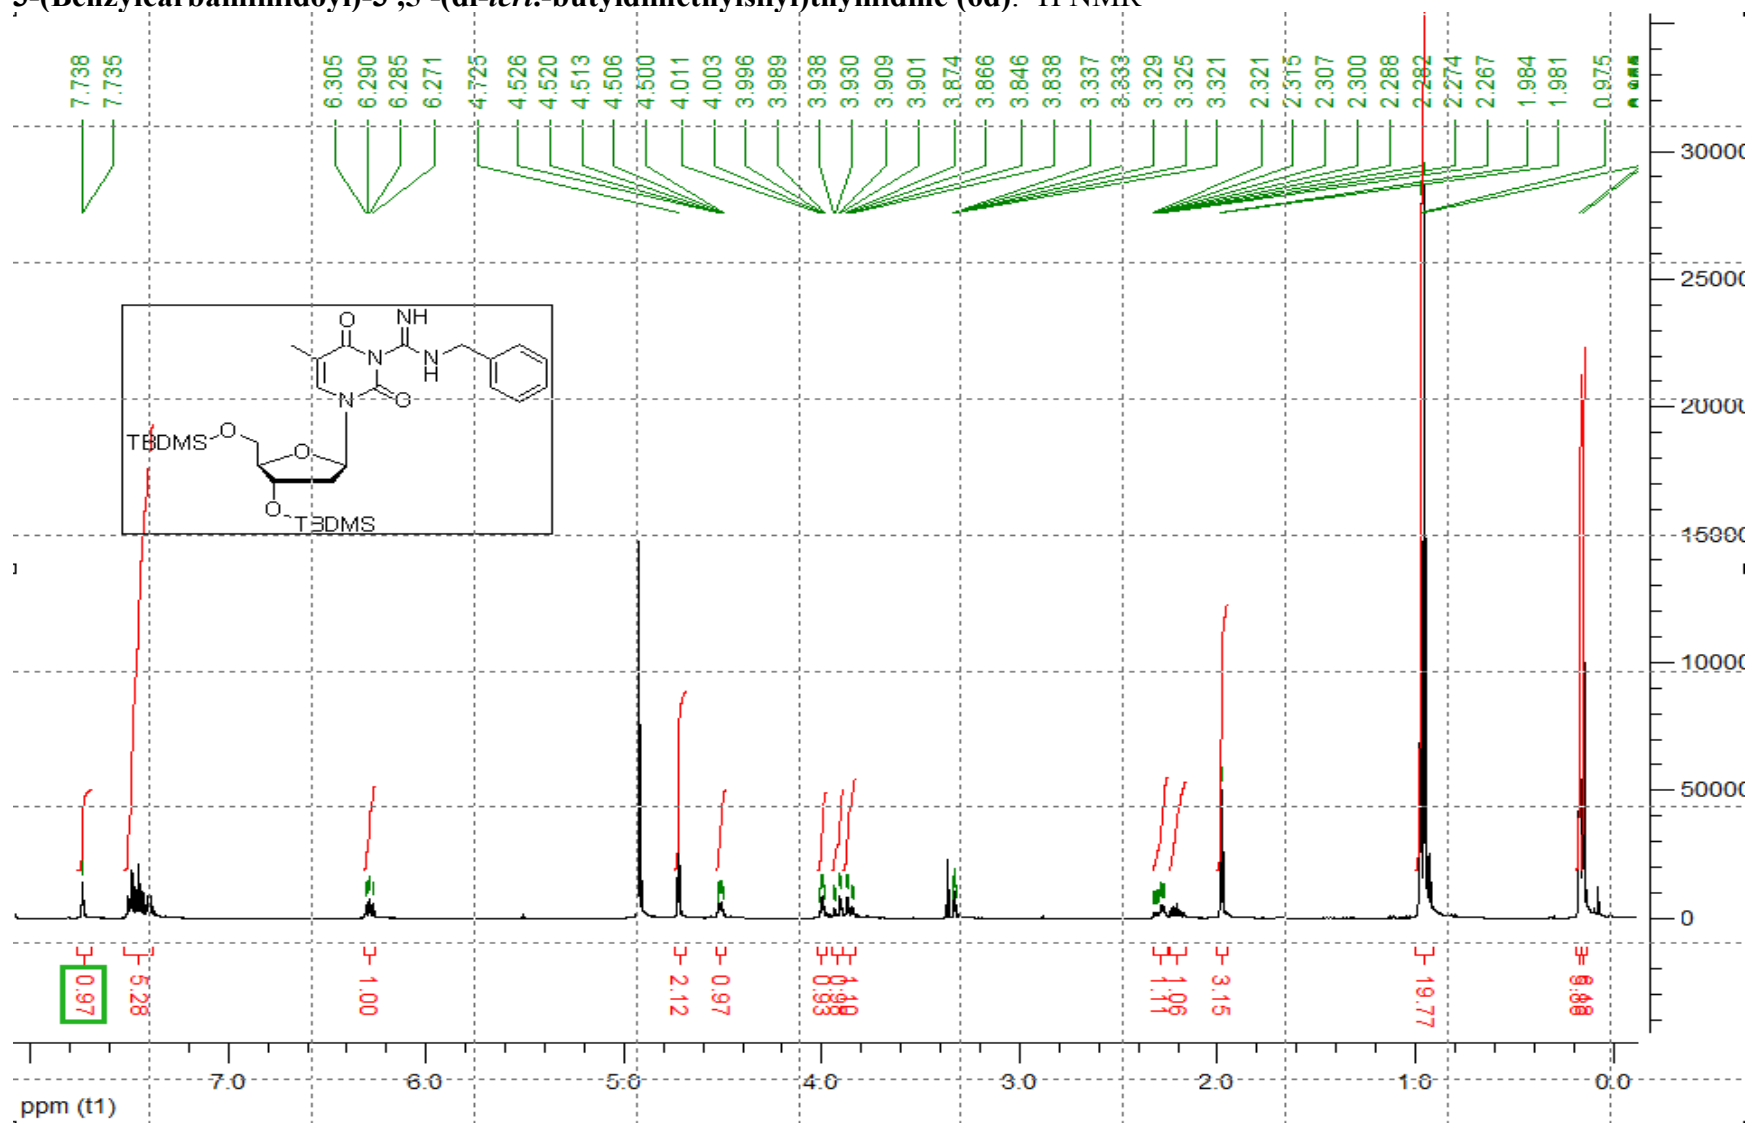

**3-(Benzylcarbamimidoyl)-3',5'-(di-*tert.*-butyldimethylsilyl)thymidine (6d). <sup>13</sup>C NMR**

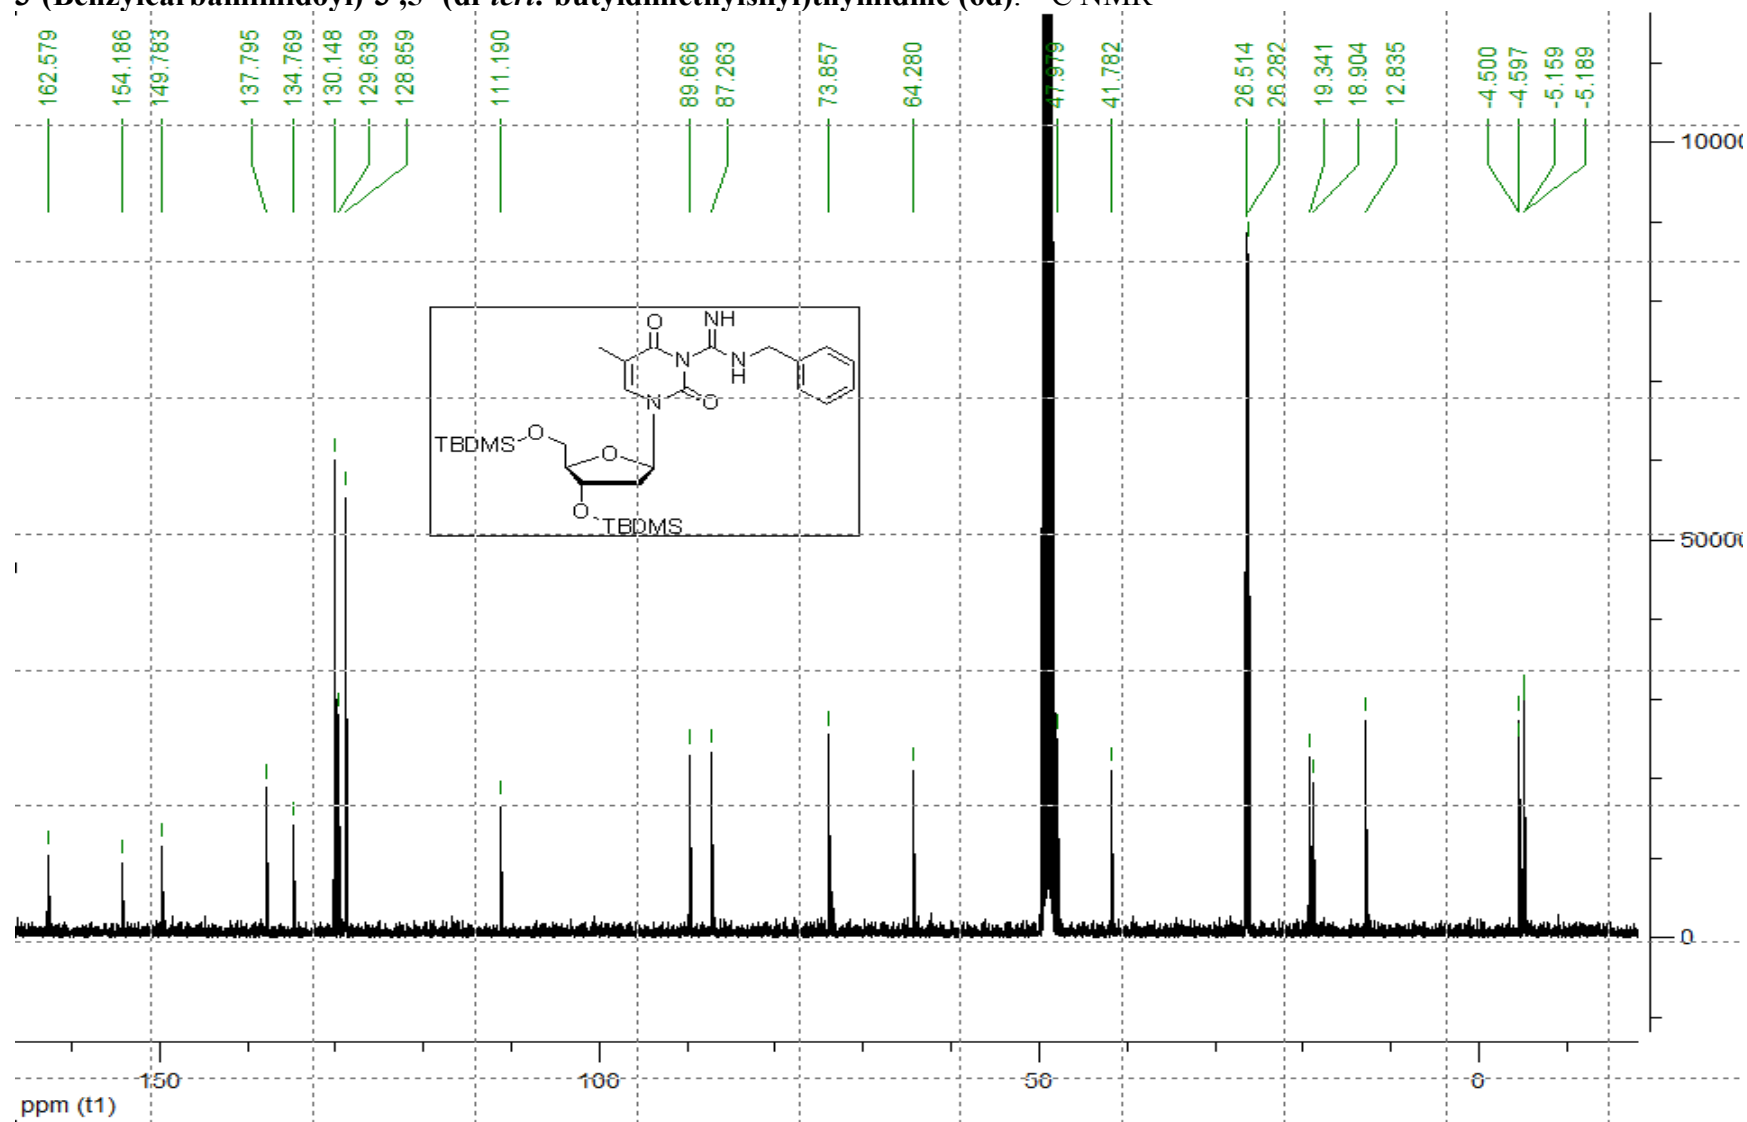

**3-(Benzylcarbamiimidoyl)-3',5'-(di-*tert.*-butyldimethylsilyl)thymidine (6d).** HR-ESI-MS found: 603.3331 and 625.3253.

L081008D 166 (3.044) AM (Cen,4, 80.00, Ar,0.0,0.00,1.00); Sm (SG, 2x3.00); Cm (102:176)

TOF MS ES+  
9.98e4

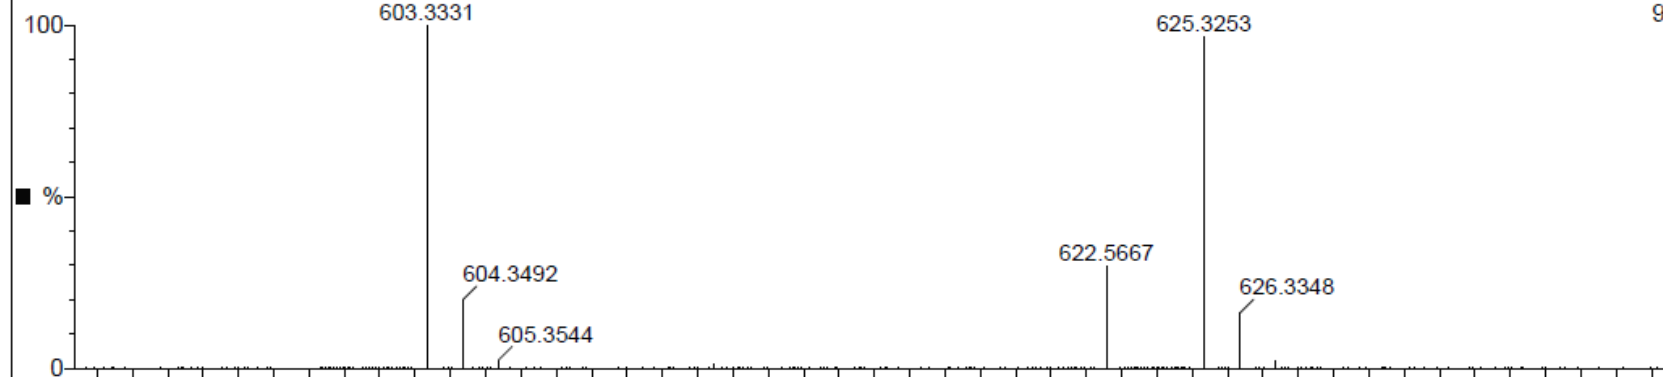

3-[2-(*closo*-1,7-Carboranyl)ethylcarbamimidoyl]-3',5'-(di-*tert*-butyldimethylsilyl)thymidine (6e).  $^1\text{H}$  NMR

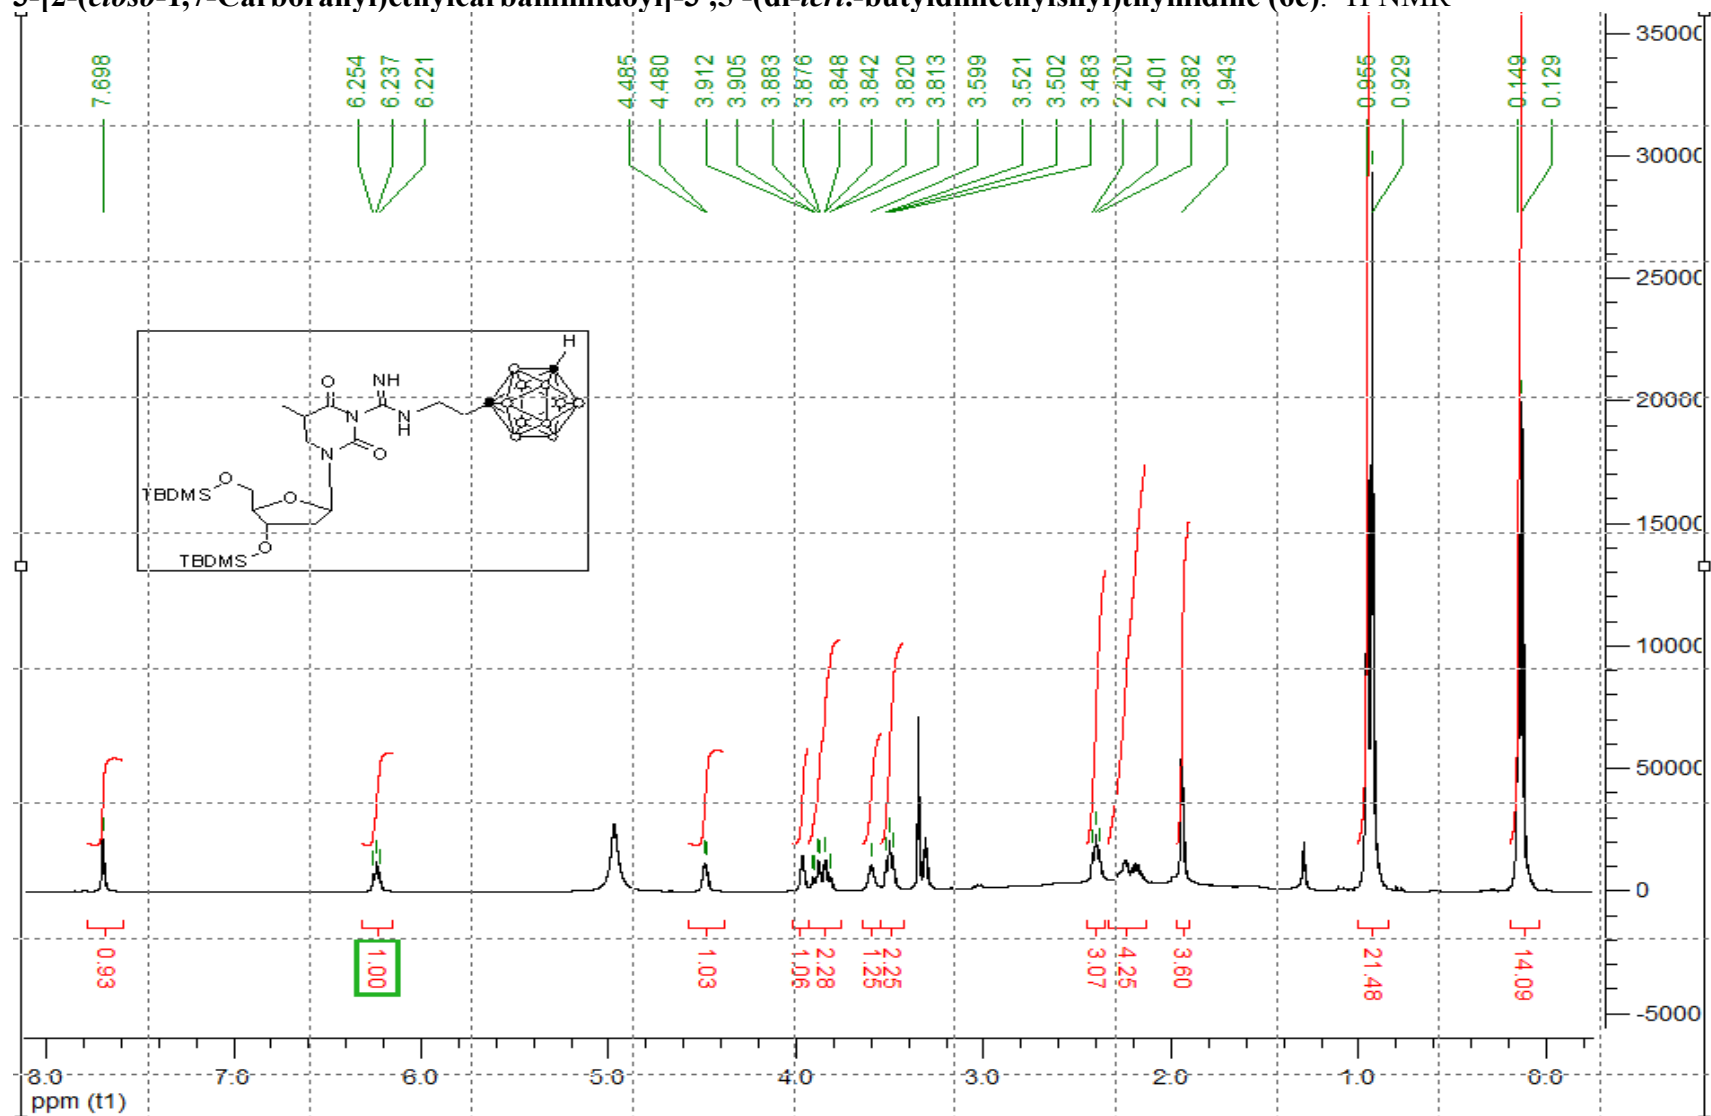

3-[2-(*closo*-1,7-Carboranyl)ethylcarbamimidoyl]-3',5'-(di-*tert*.-butyldimethylsilyl)thymidine (6e).  $^{13}\text{C}$  NMR

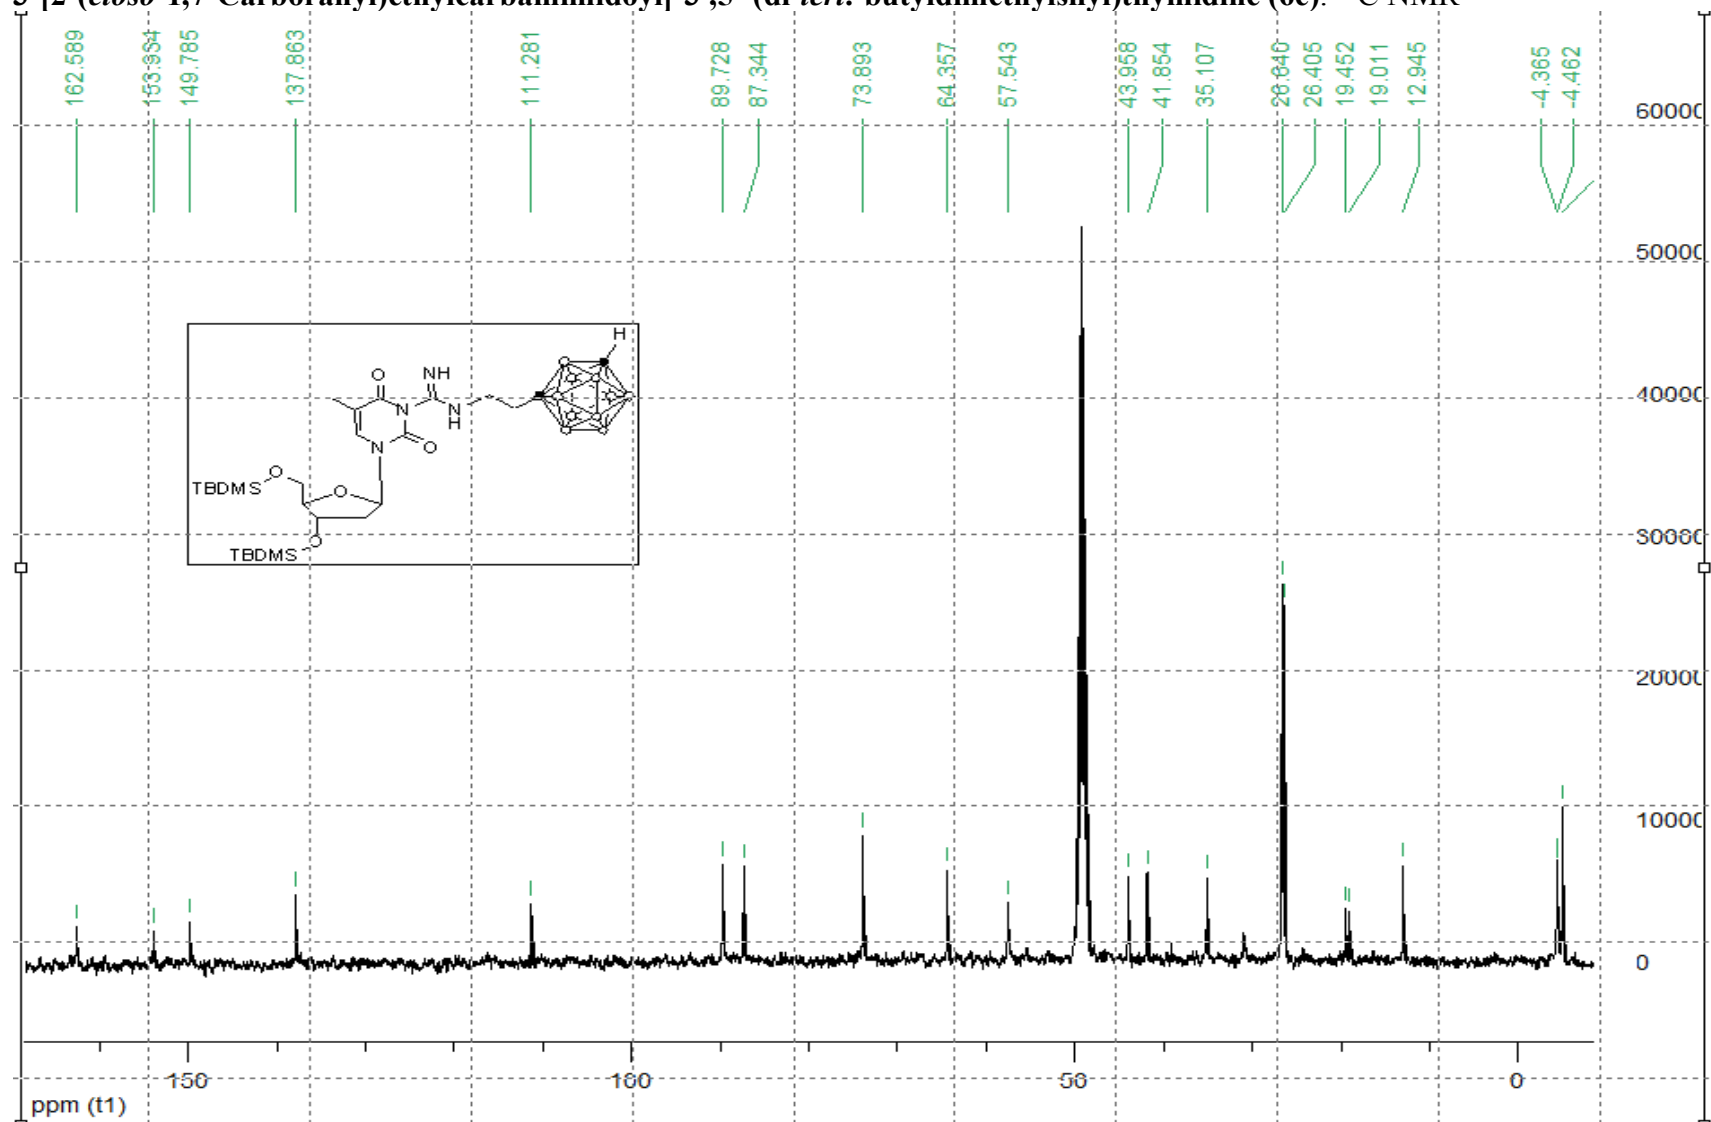



3-[2-(*closo*-1,7-Carboranyl)ethylcarbamimidoyl]-3',5'-(di-*tert.*-butyldimethylsilyl)thymidine (6e). HR-ESI-MS found: 683.5076.

HKW-20

L122110B 482 (16.878) AM (Cen,4, 80.00, Ar,5000.0,0.00,0.70); Sm (SG, 2x3.00); Cm (482:487)

TOF MS ES+  
1.63e5

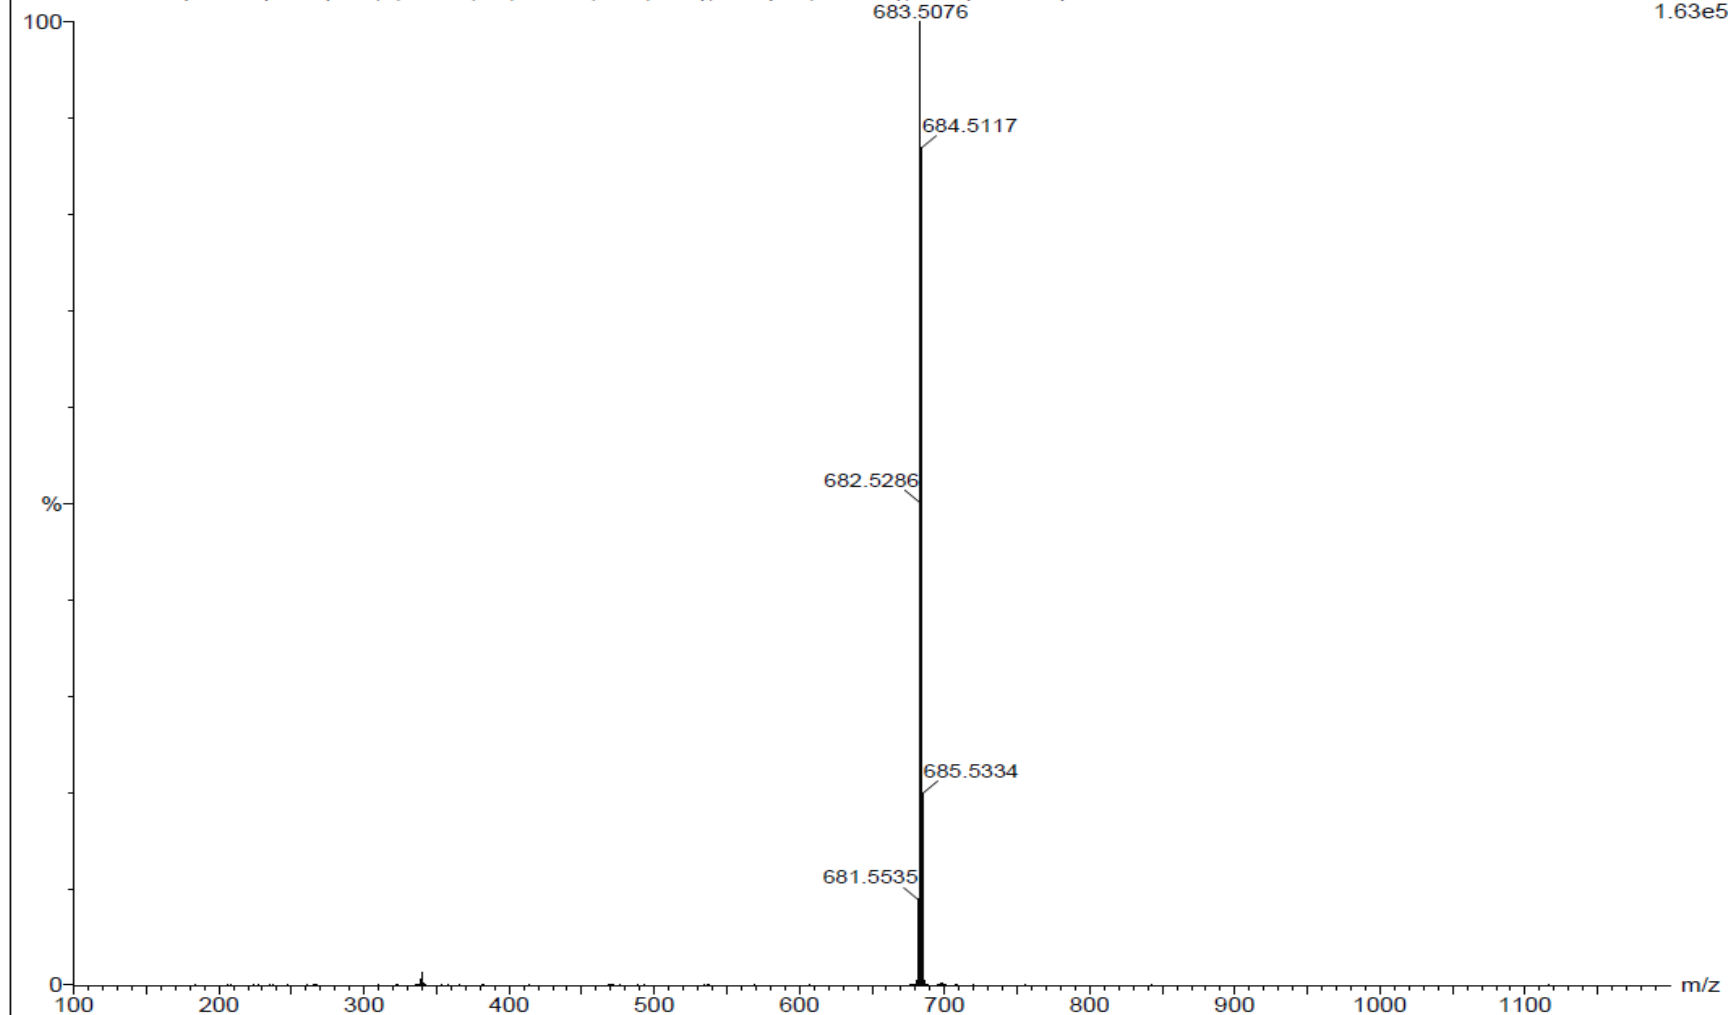

**3-[3-(*closo*-1,7-Carboranyl)propylcarbamimidoyl]-3',5'-(di-*tert.*-butyldimethylsilyl)thymidine (6f).** HR-ESI-MS found:  
697.5167.

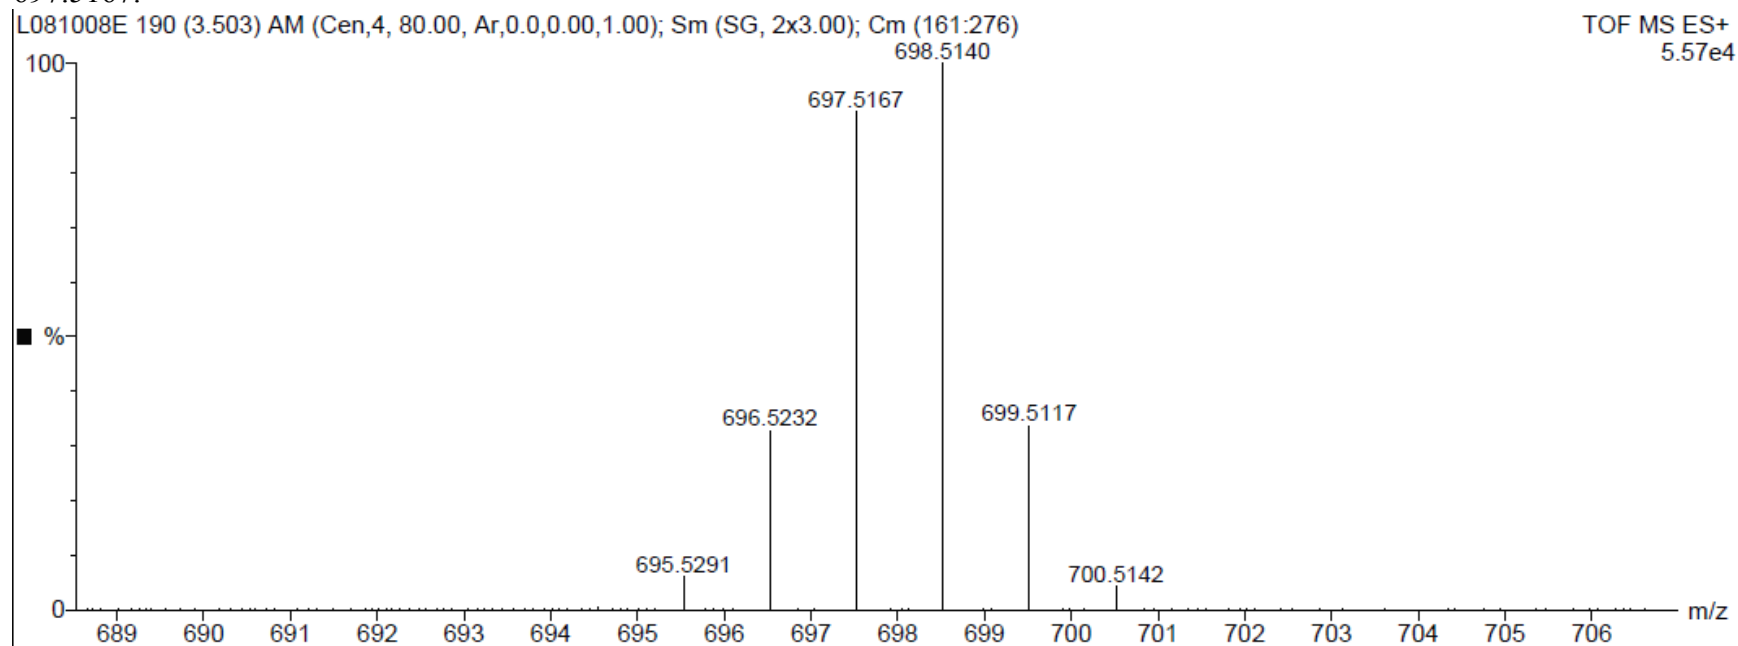

3-[4-(*closo*-1,7-Carboranyl)butylcarbamimidoyl]-3',5'-(di-*tert*-butyldimethylsilyl)thymidine (6g).  $^1\text{H}$  NMR

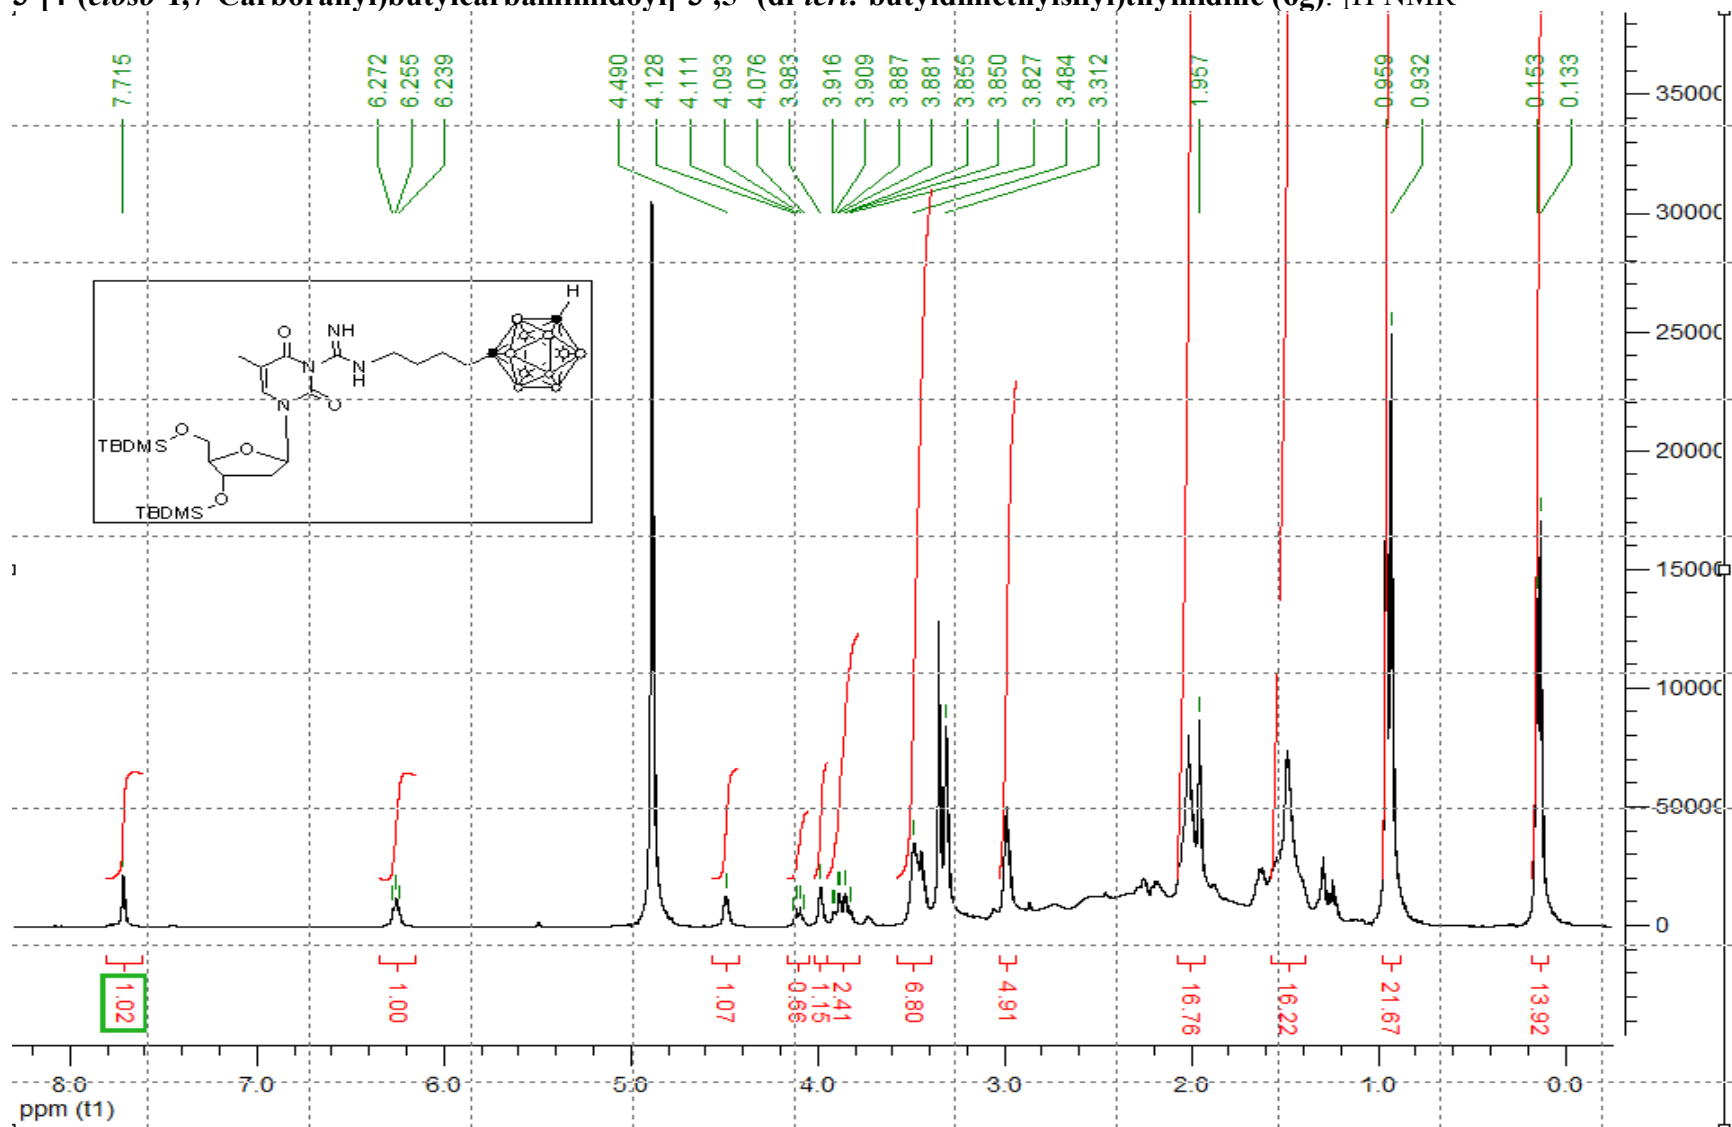

3-[4-(*closo*-1,7-Carboranyl)butylcarbamimidoyl]-3',5'-(di-*tert*-butyldimethylsilyl)thymidine (6g).  $^{13}\text{C}$  NMR

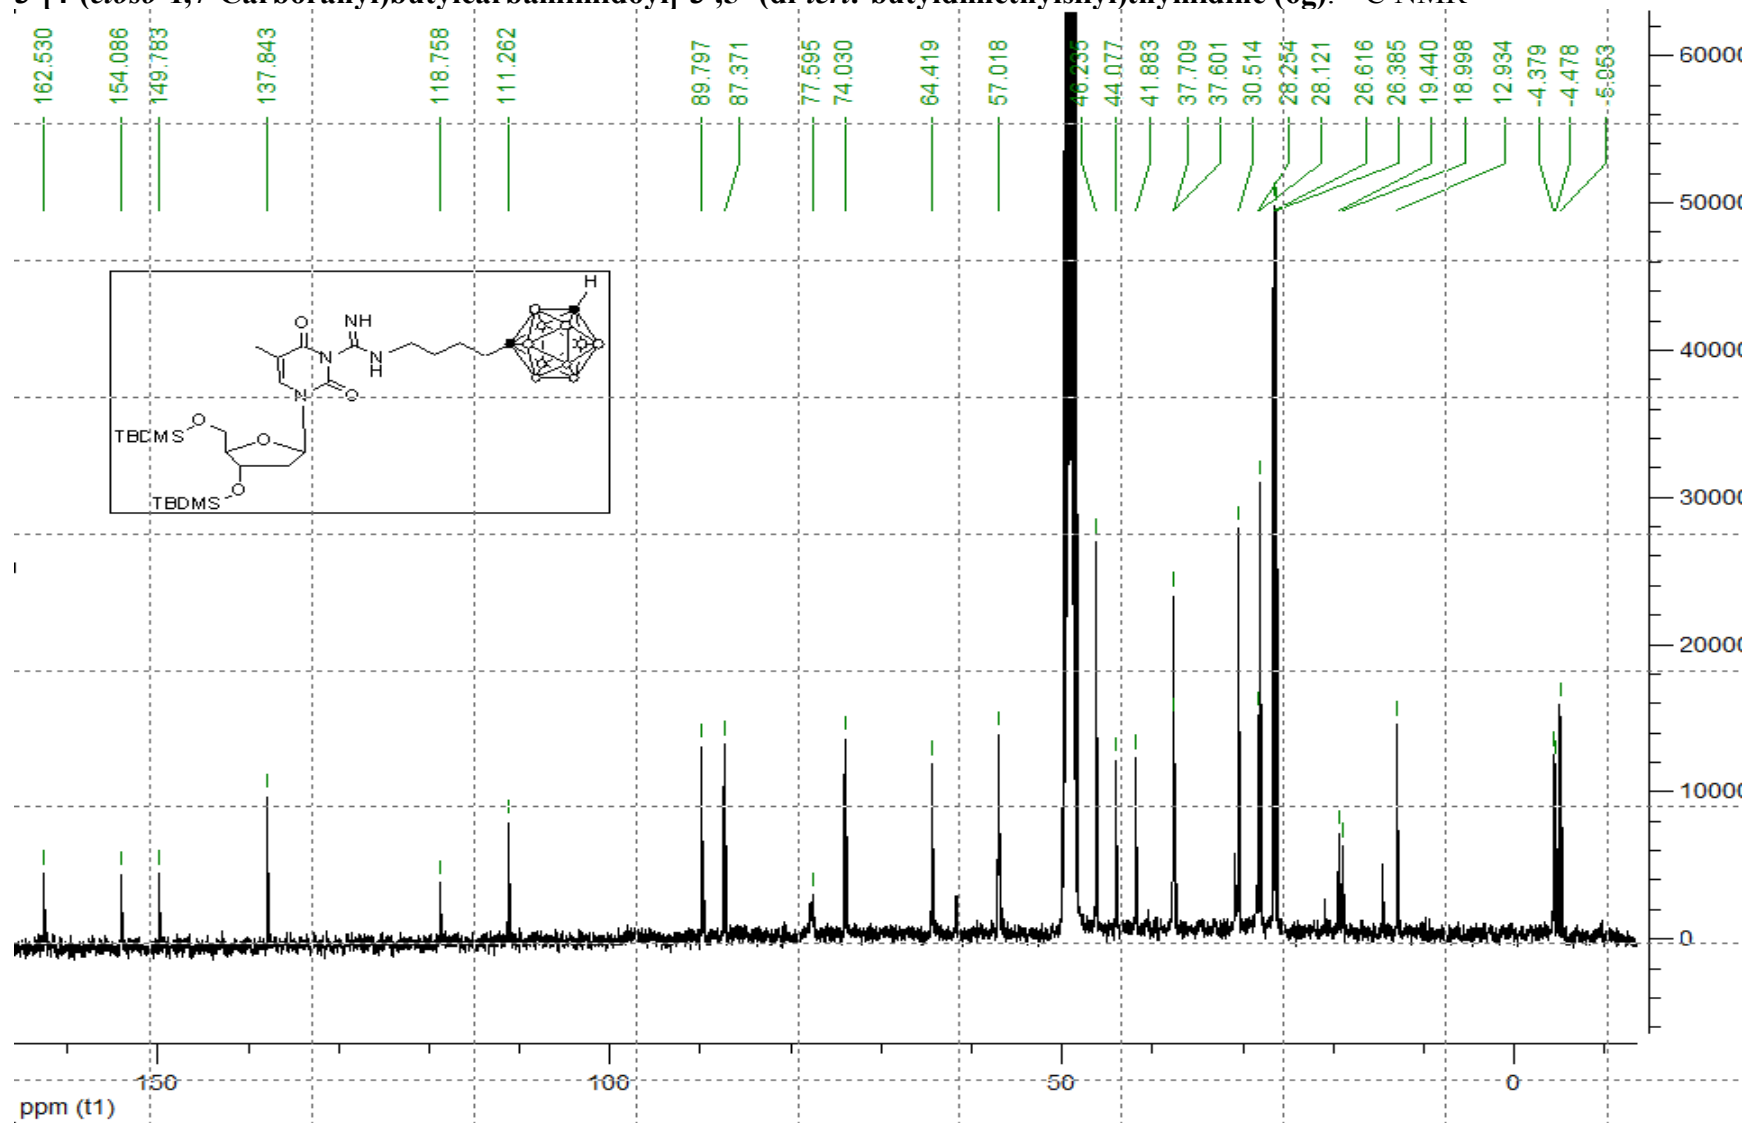

3-[4-(*closo*-1,7-Carboranyl)butylcarbamimidoyl]-3',5'-(di-*tert.*-butyldimethylsilyl)thymidine (6g). HR-ESI-MS found: 712.5307.

L101910C 239 (4.383) AM (Cen,4, 80.00, Ar,5000.0,0.00,0.70); Sm (SG, 2x3.00); Cm (238:298)

TOF MS ES+

1.34e4

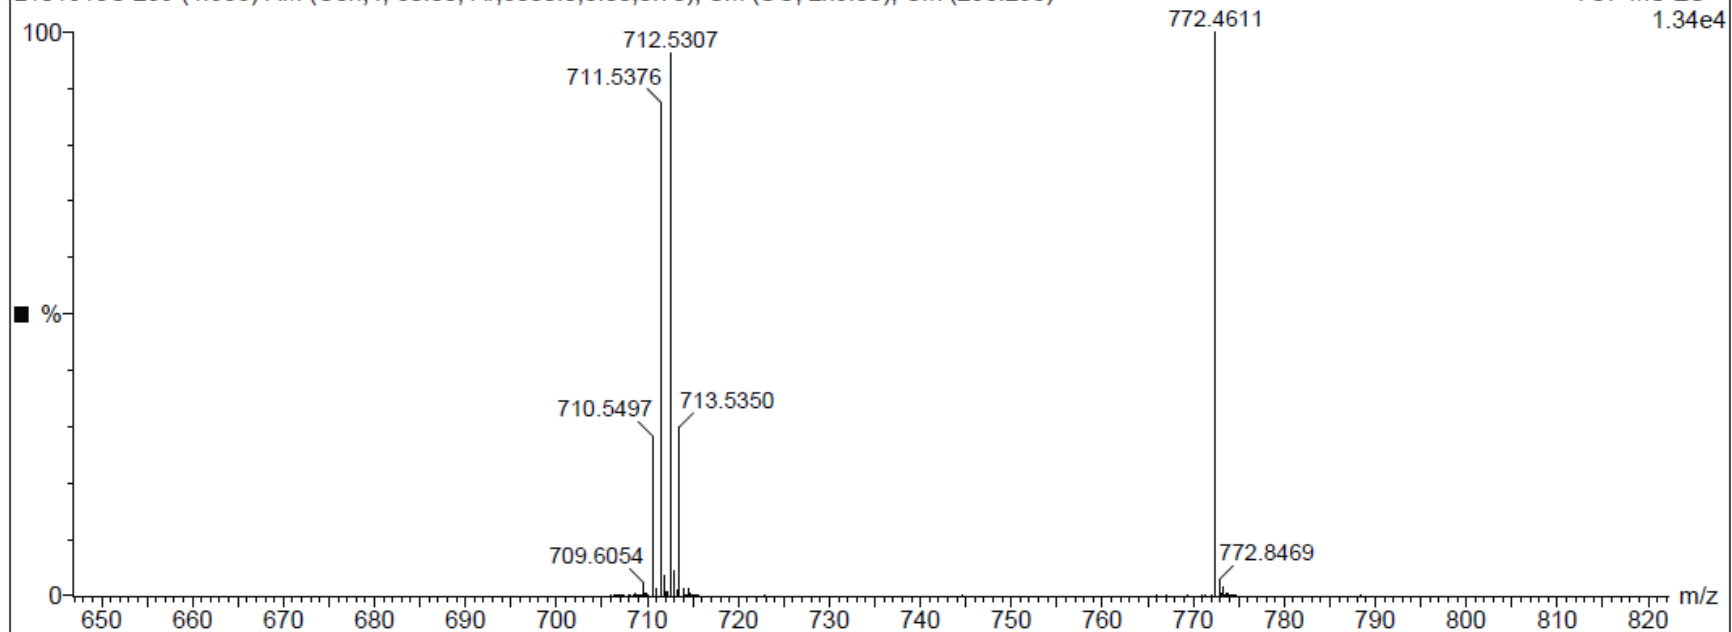

3-(Propylcarbamimidoyl)thymidine (7a). <sup>1</sup>H NMR

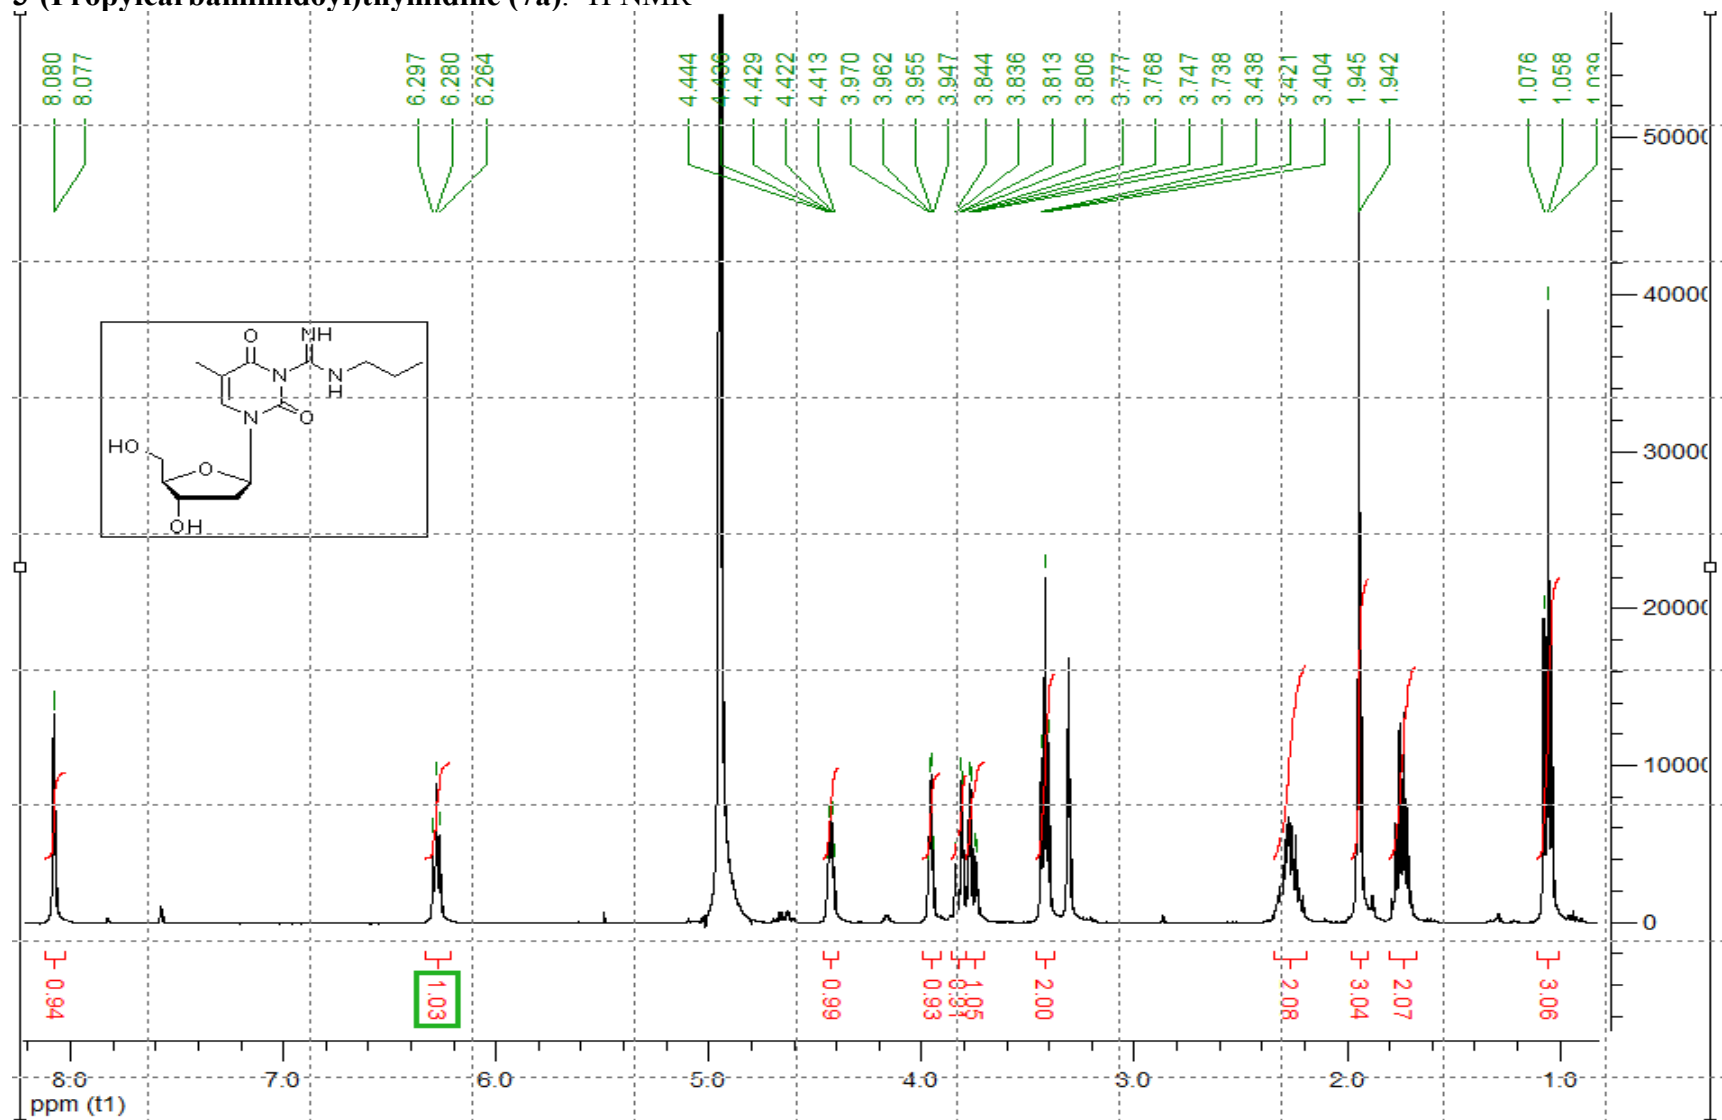

3-(Propylcarbamimidoyl)thymidine (7a). <sup>13</sup>C NMR

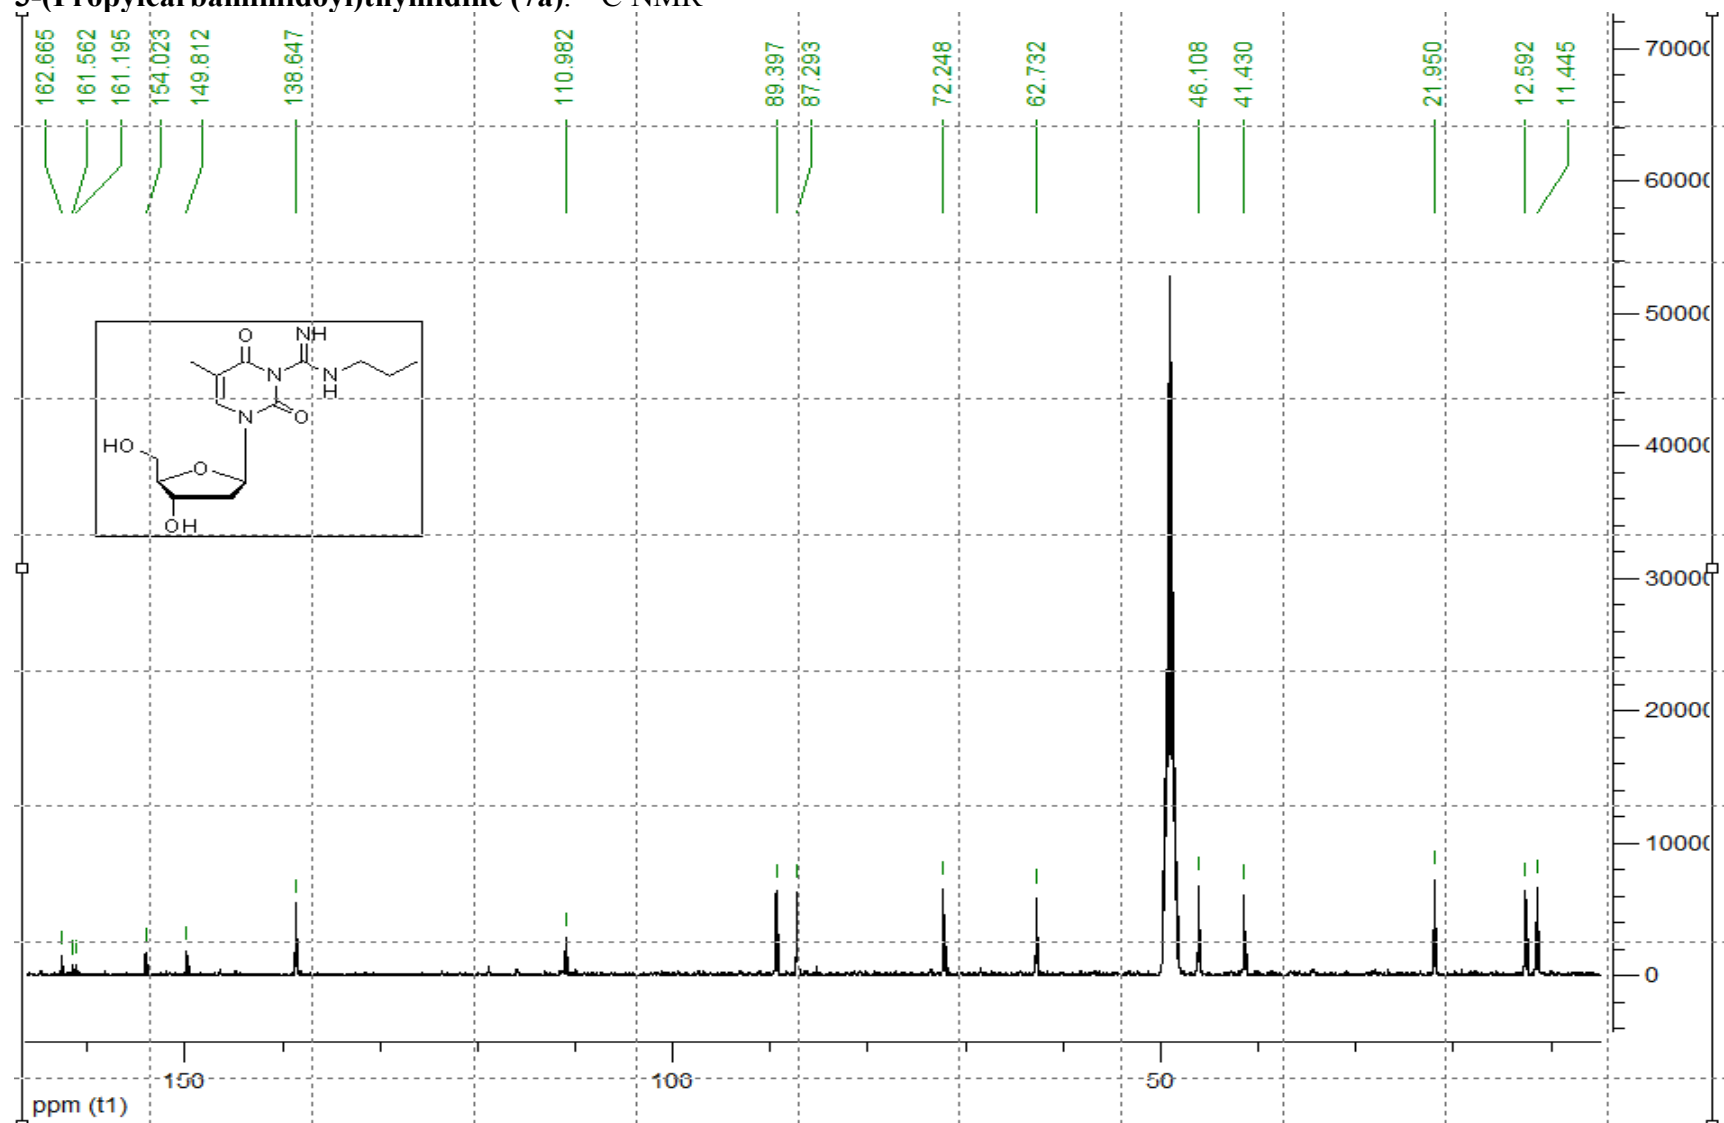

**3-(Propylcarbamimidoyl)thymidine (7a).** HR-ESI-MS found: 327.1654.

L100109D 565 (10.363) AM (Cen,4, 80.00, Ar,5000.0,0.00,0.70); Sm (SG, 2x3.00); Cm (560:587)

TOF MS ES+  
1.82e5

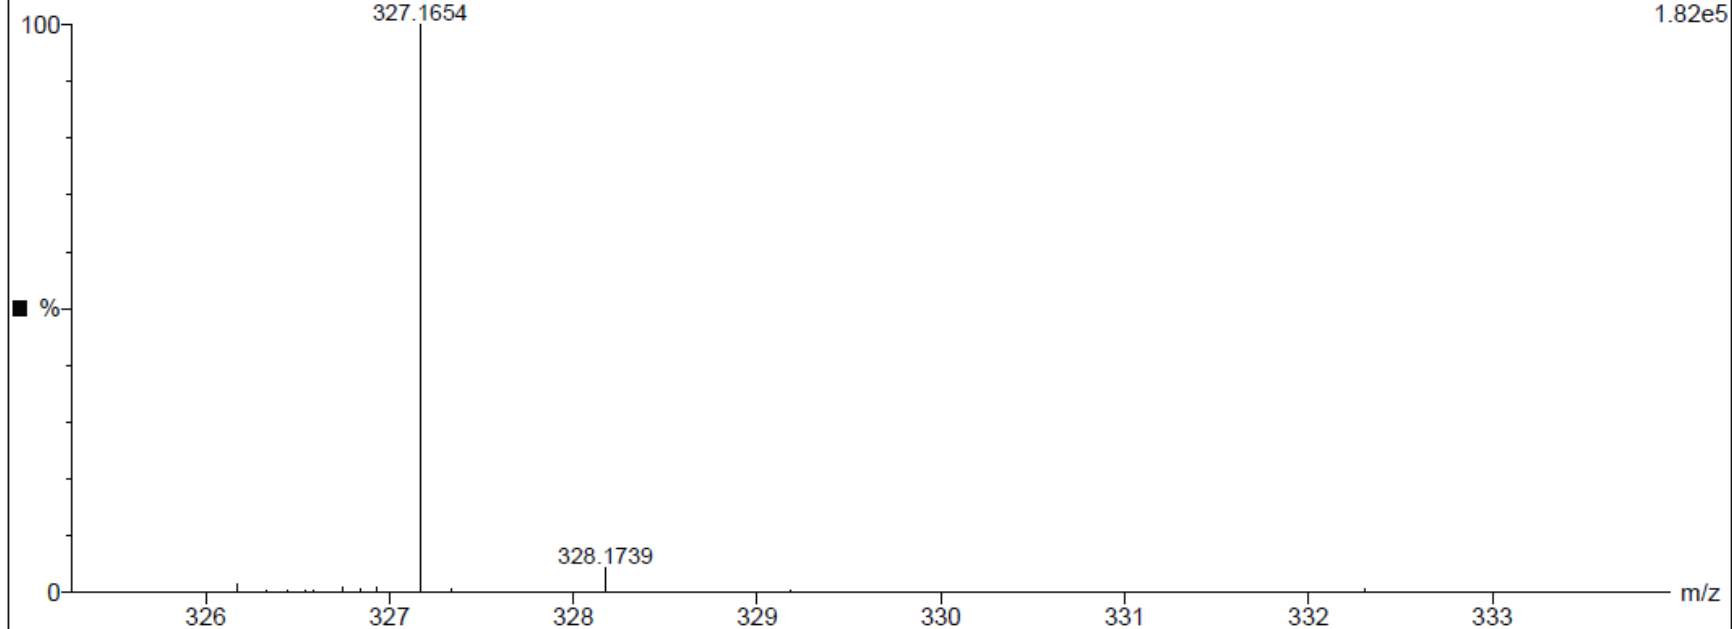



**3-(Propylcarbamimidoyl)thymidine (7a).** Analytical traces in Water:Acetonitrile gradient

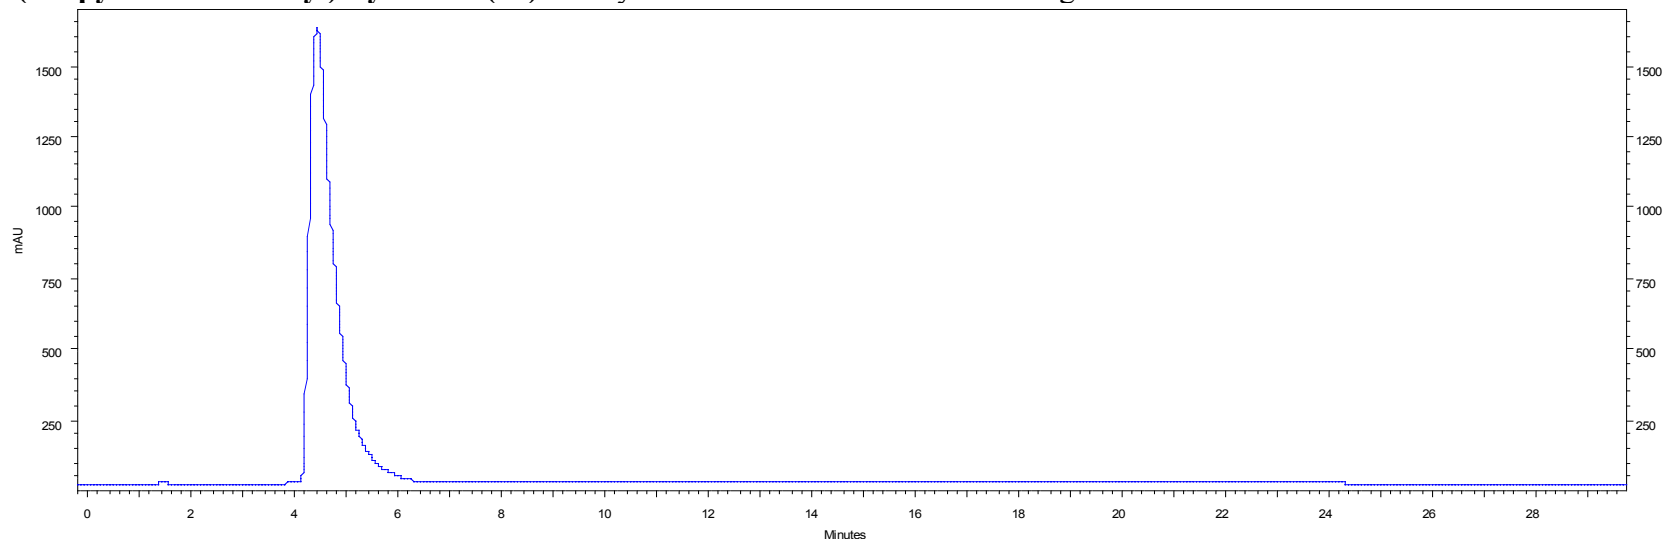

Analytical traces in Water:Methanol gradient

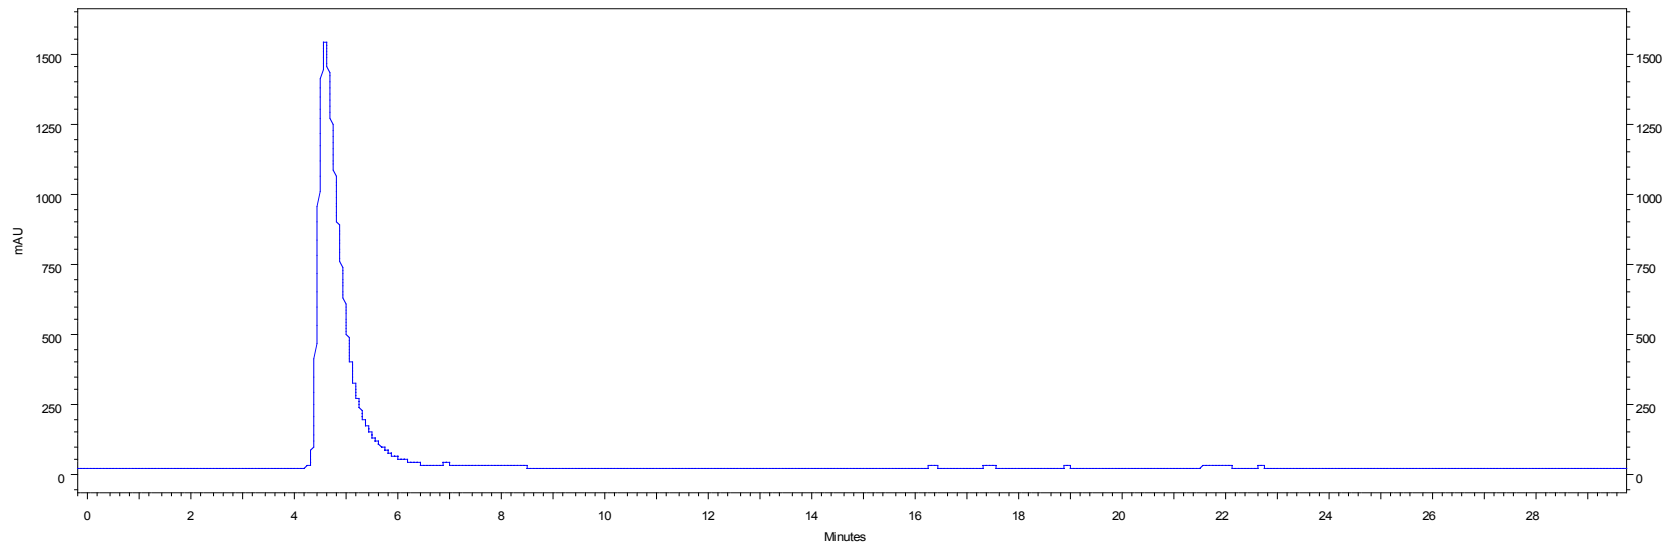

3-(Butylcarbamimidoyl)thymidine (7b). <sup>1</sup>H NMR

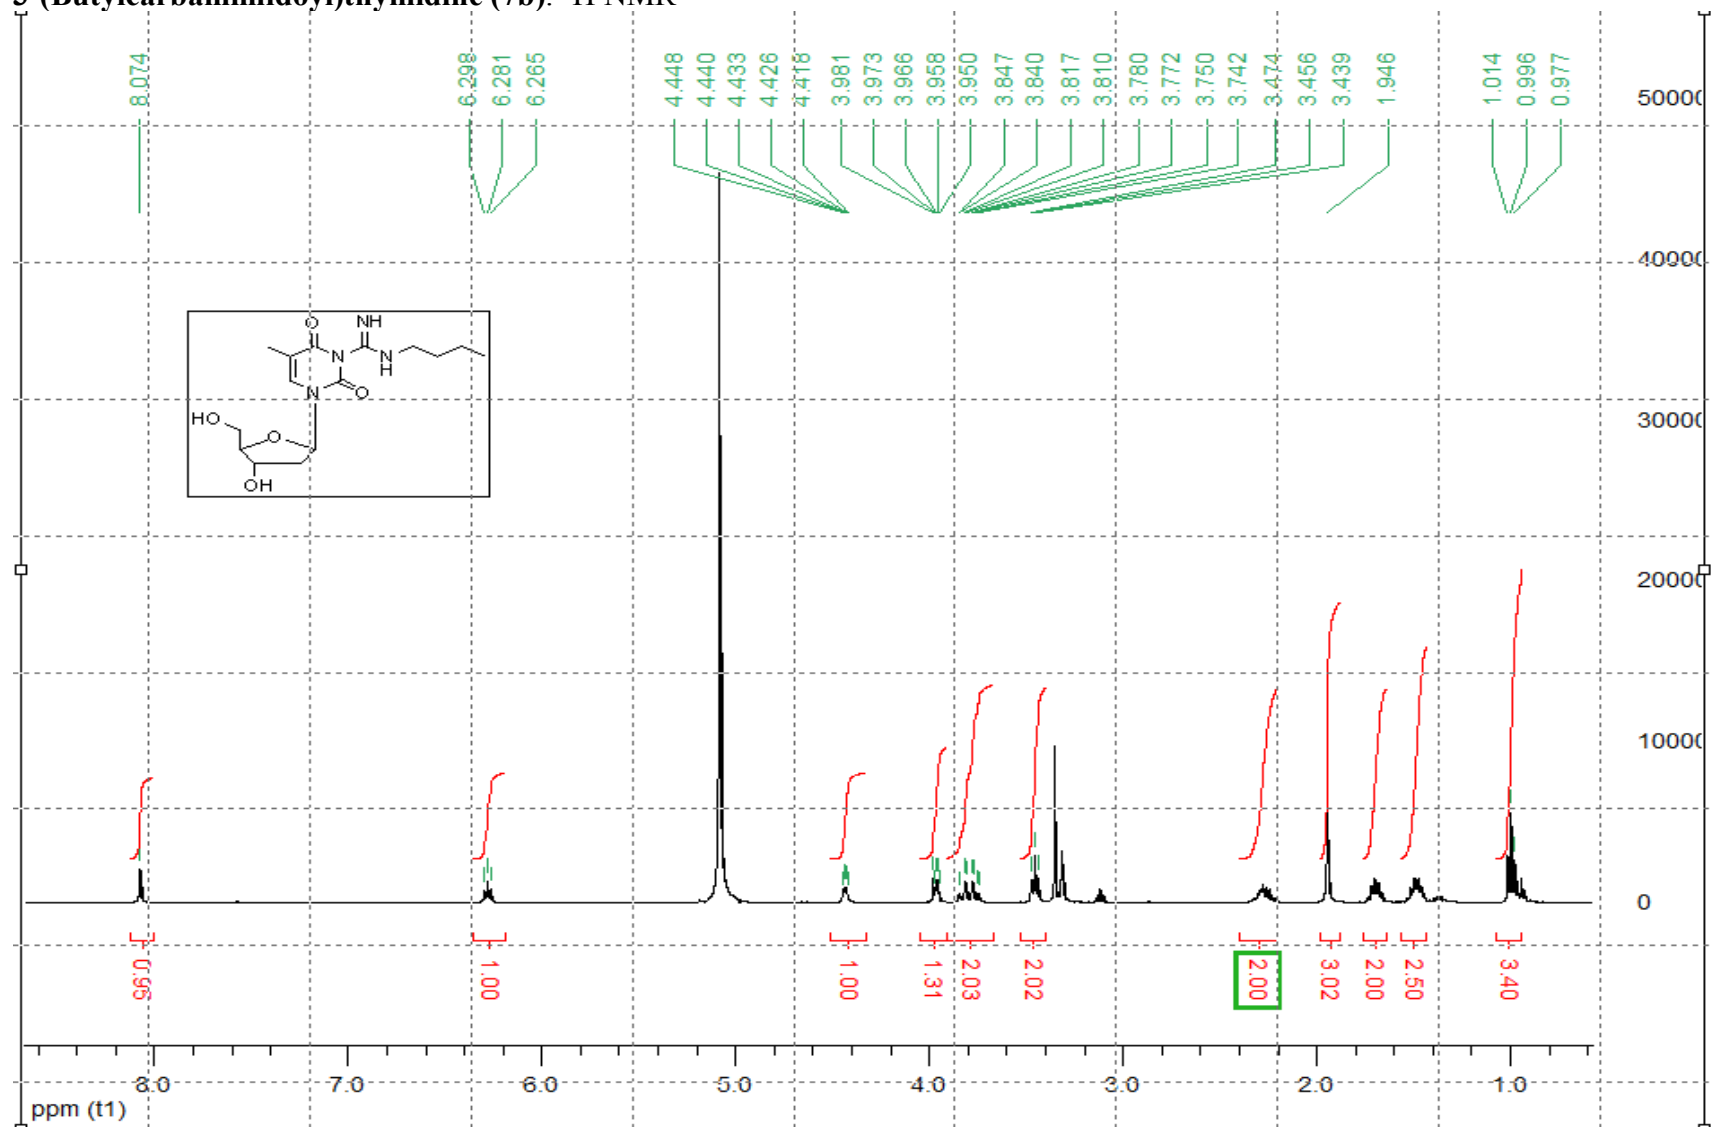

3-(Butylcarbamimidoyl)thymidine (7b). <sup>13</sup>C NMR

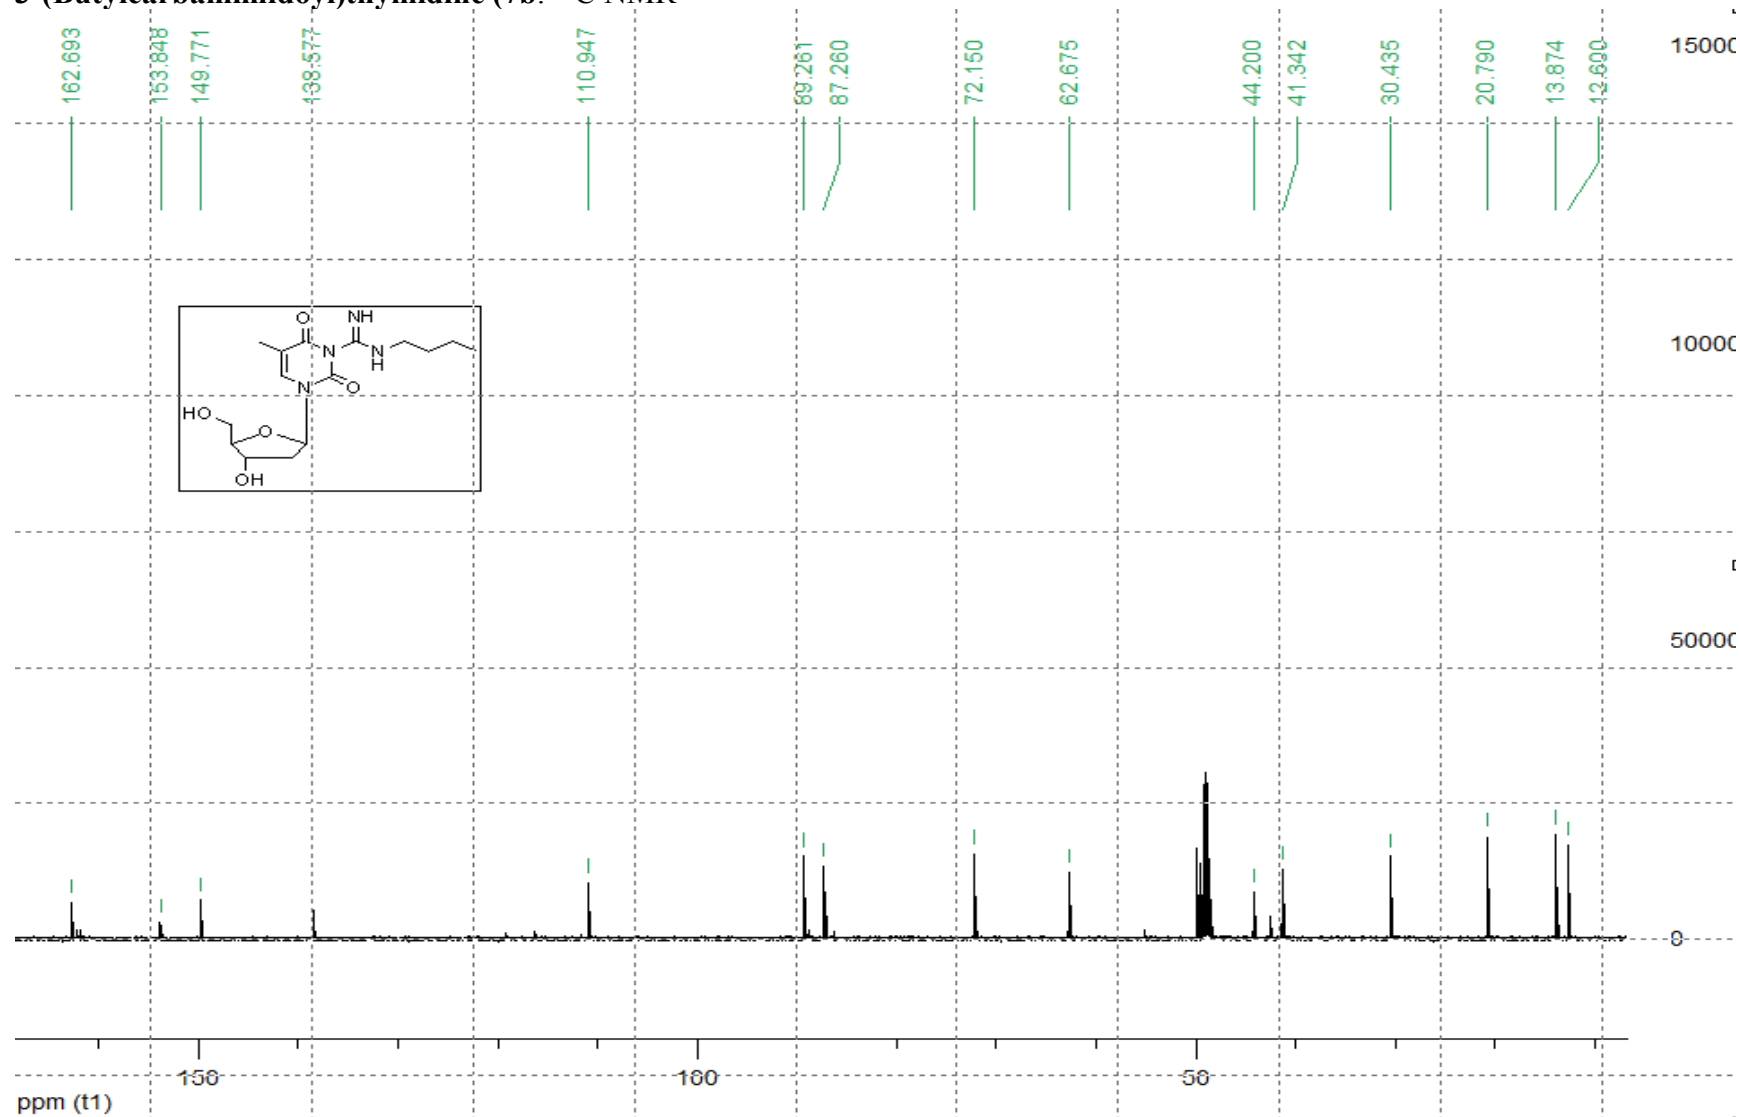

**3-(Butylcarbamidoyl)thymidine (7b).** HR-ESI-MS found: 341.1853.

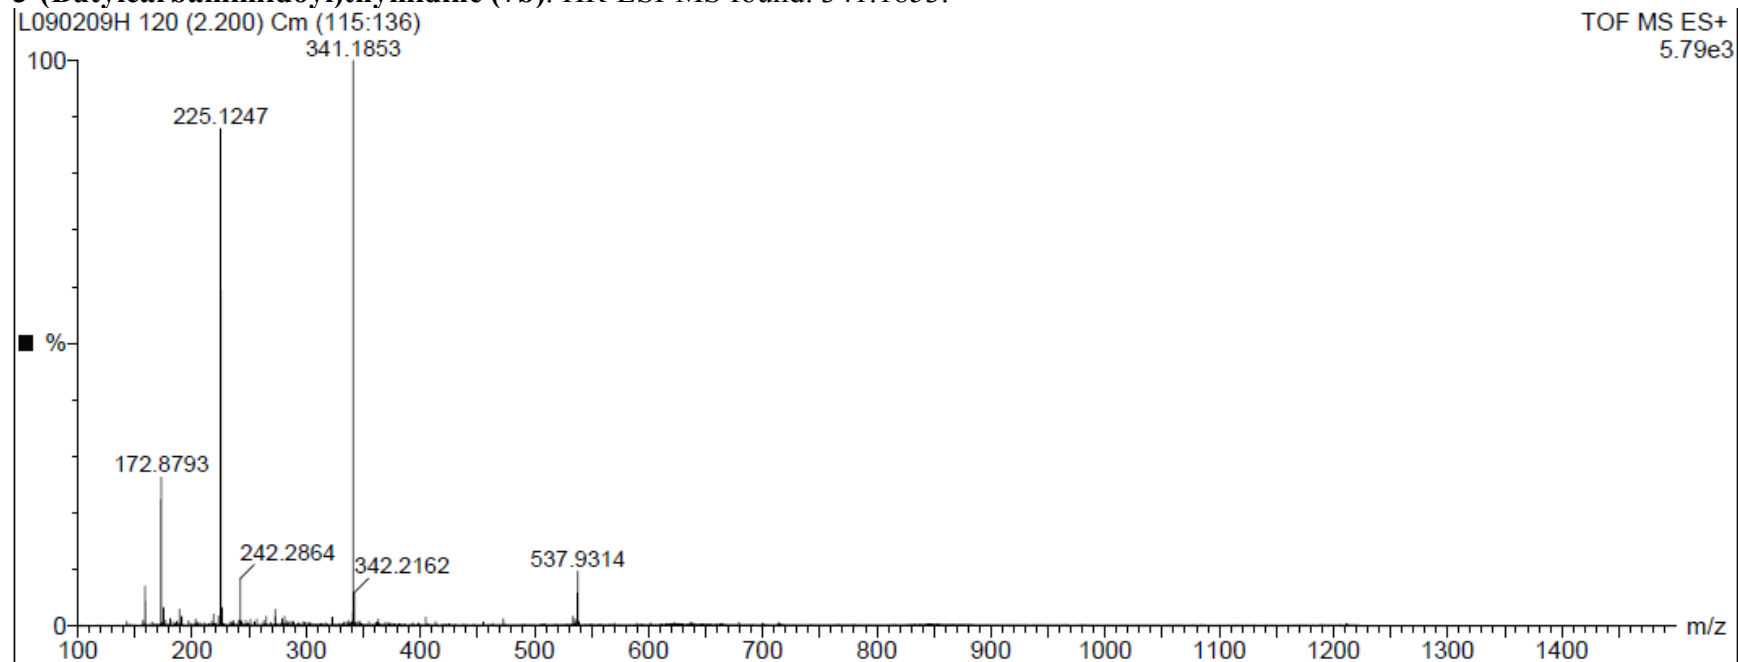

**3-(Butylcarbamimidoyl)thymidine (7b).** Analytical traces in Water:Acetonitrile gradient

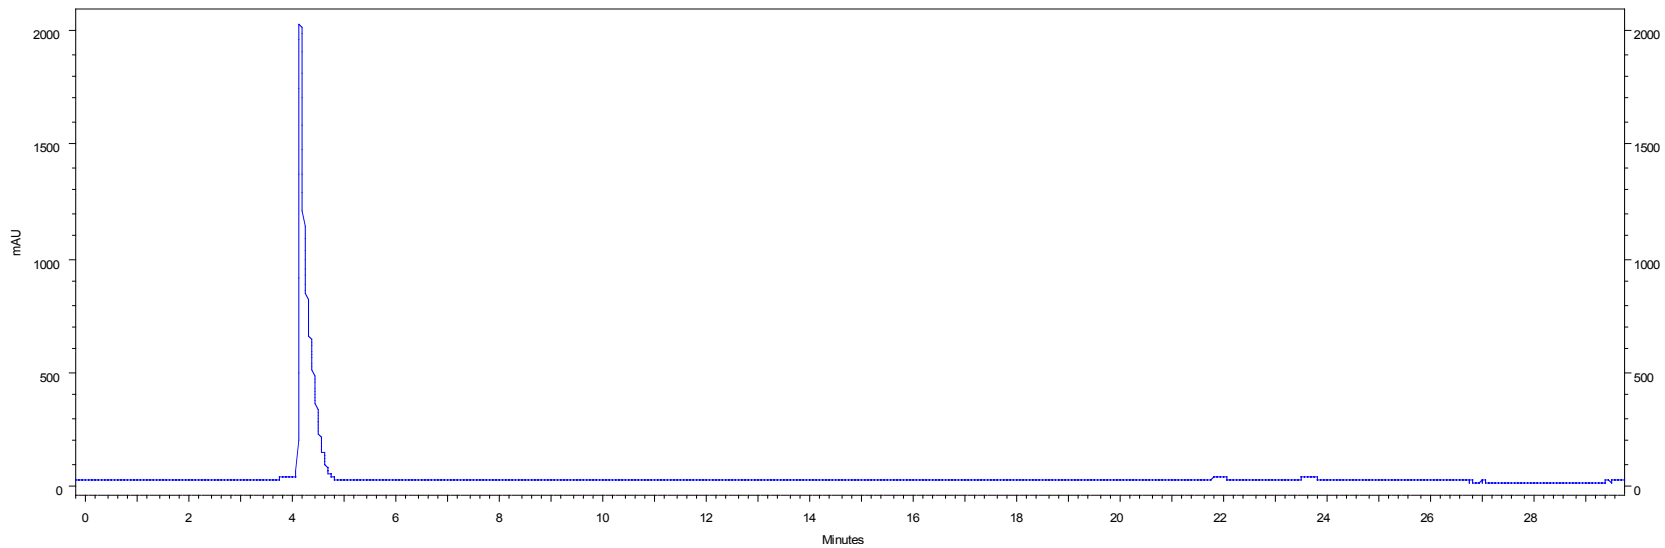

Analytical traces in Water:Methanol gradient

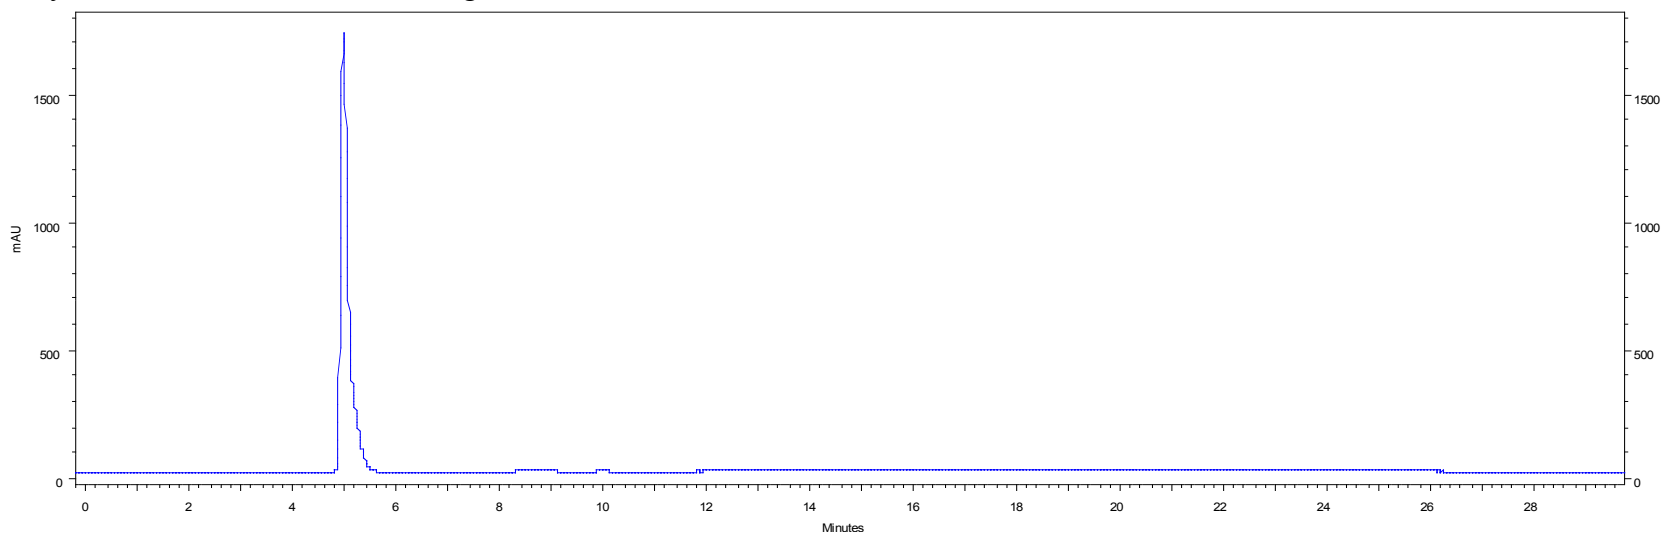

3-(Phenylcarbamimidoyl)thymidine (7c). <sup>1</sup>H NMR

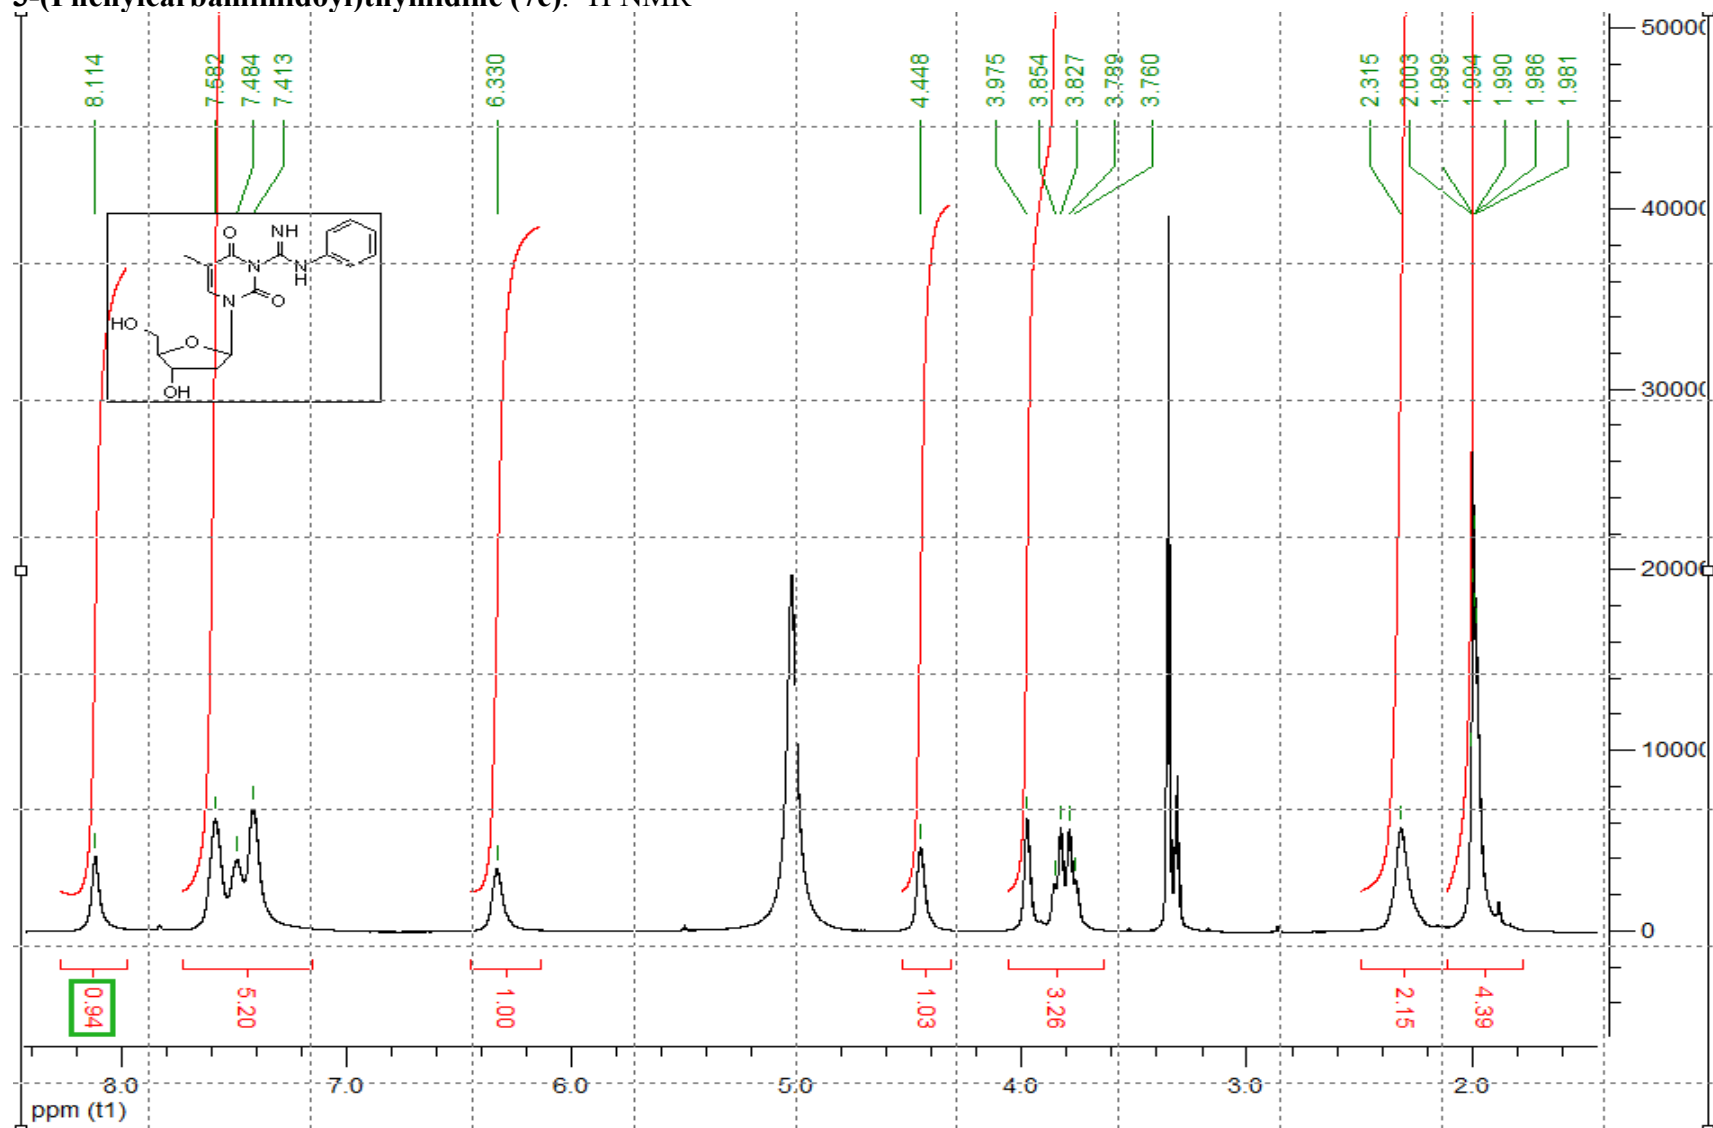

3-(Phenylcarbamimidoyl)thymidine (7c). <sup>13</sup>C NMR

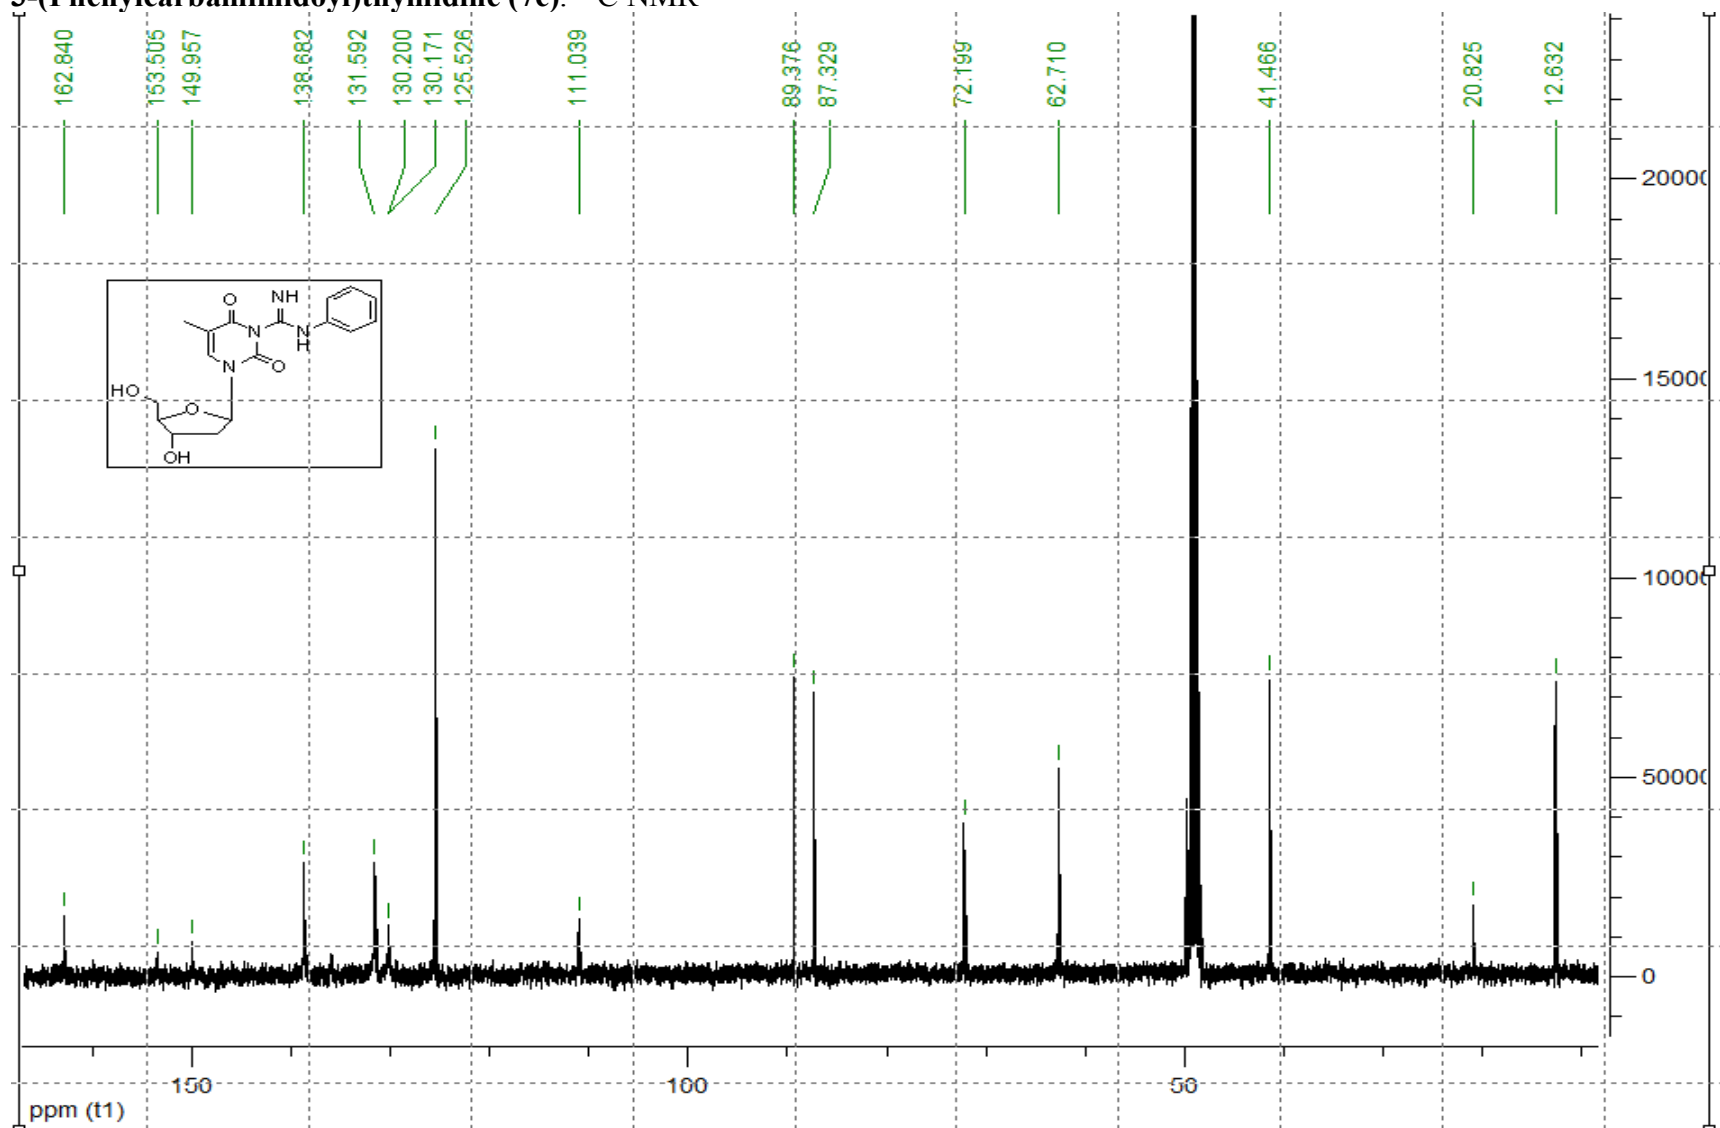

**3-(Phenylcarbamimidoyl)thymidine (7c).** HR-ESI-MS found: 361.1532

L090209E 231 (4.236) AM (Cen,4, 80.00, Ar,5000.0,0.00,0.70); Sm (SG, 2x3.00); Cm (15:286)

TOF MS ES+  
1.46e5

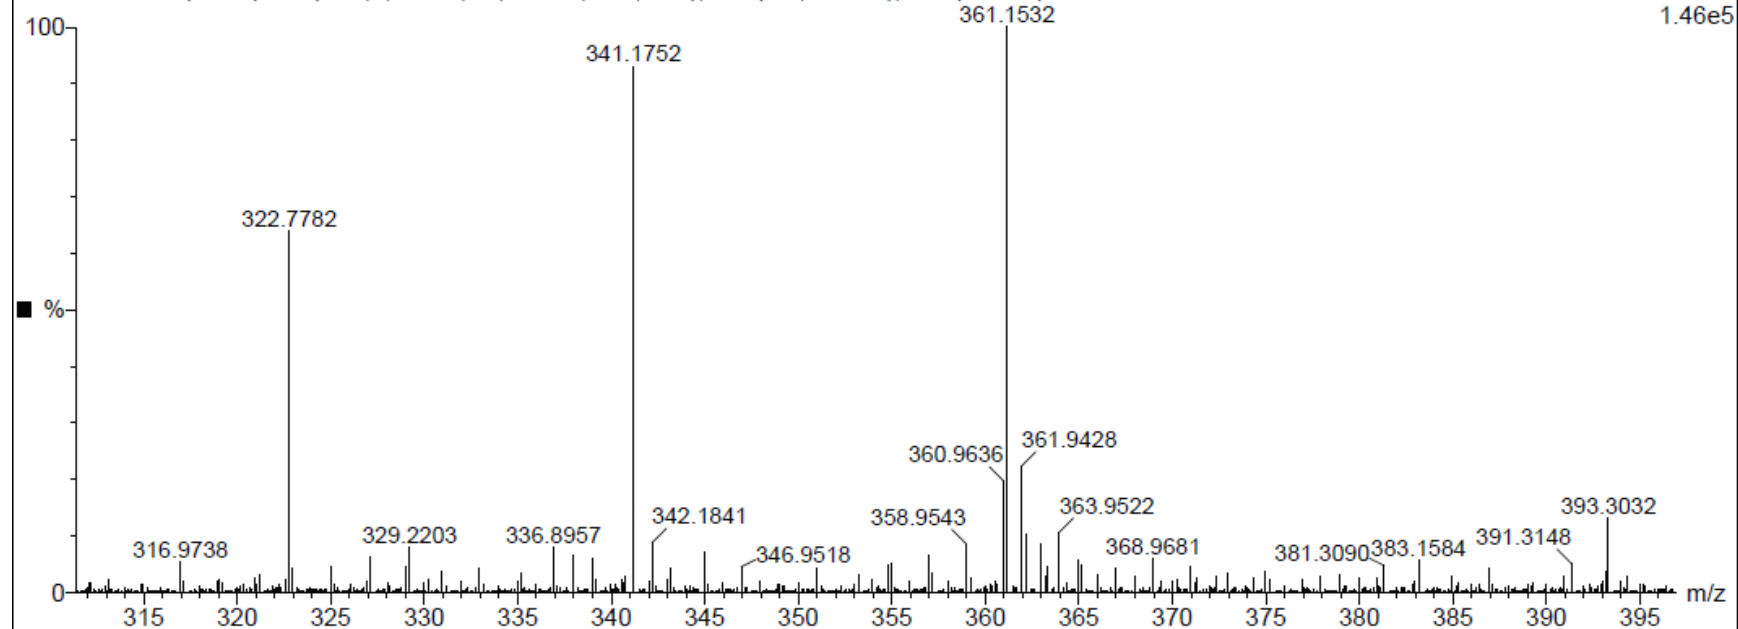



**3-(Phenylcarbamidoyl)thymidine (7c).** Analytical traces in Water:Acetonitrile gradient

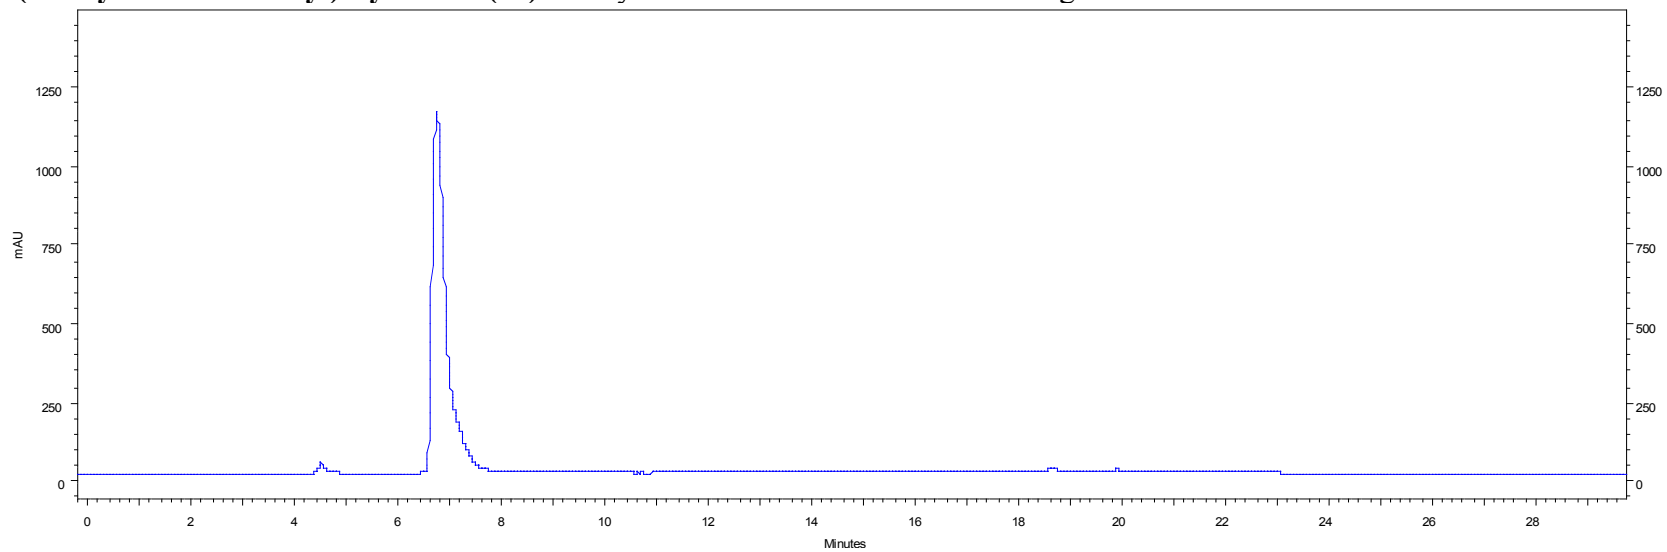

Analytical traces in Water:Methanol gradient

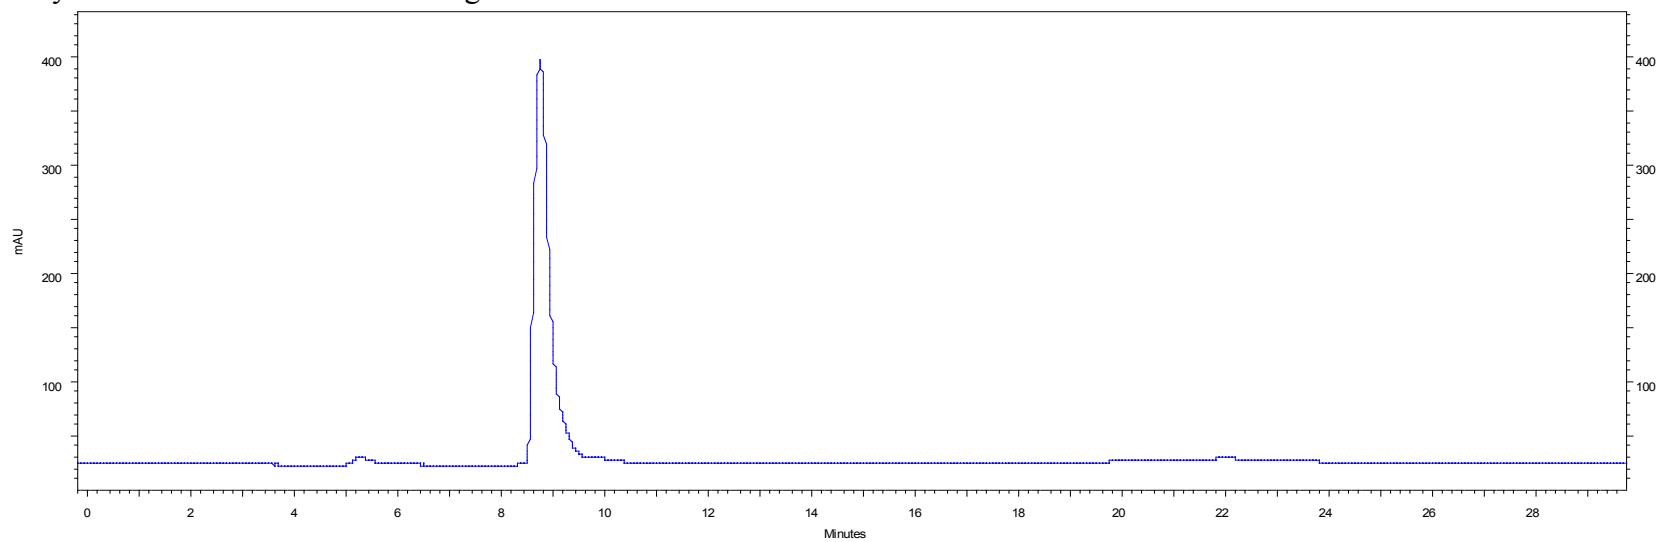

3-(Benzylcarbamimidoyl)thymidine (7d). <sup>1</sup>H NMR

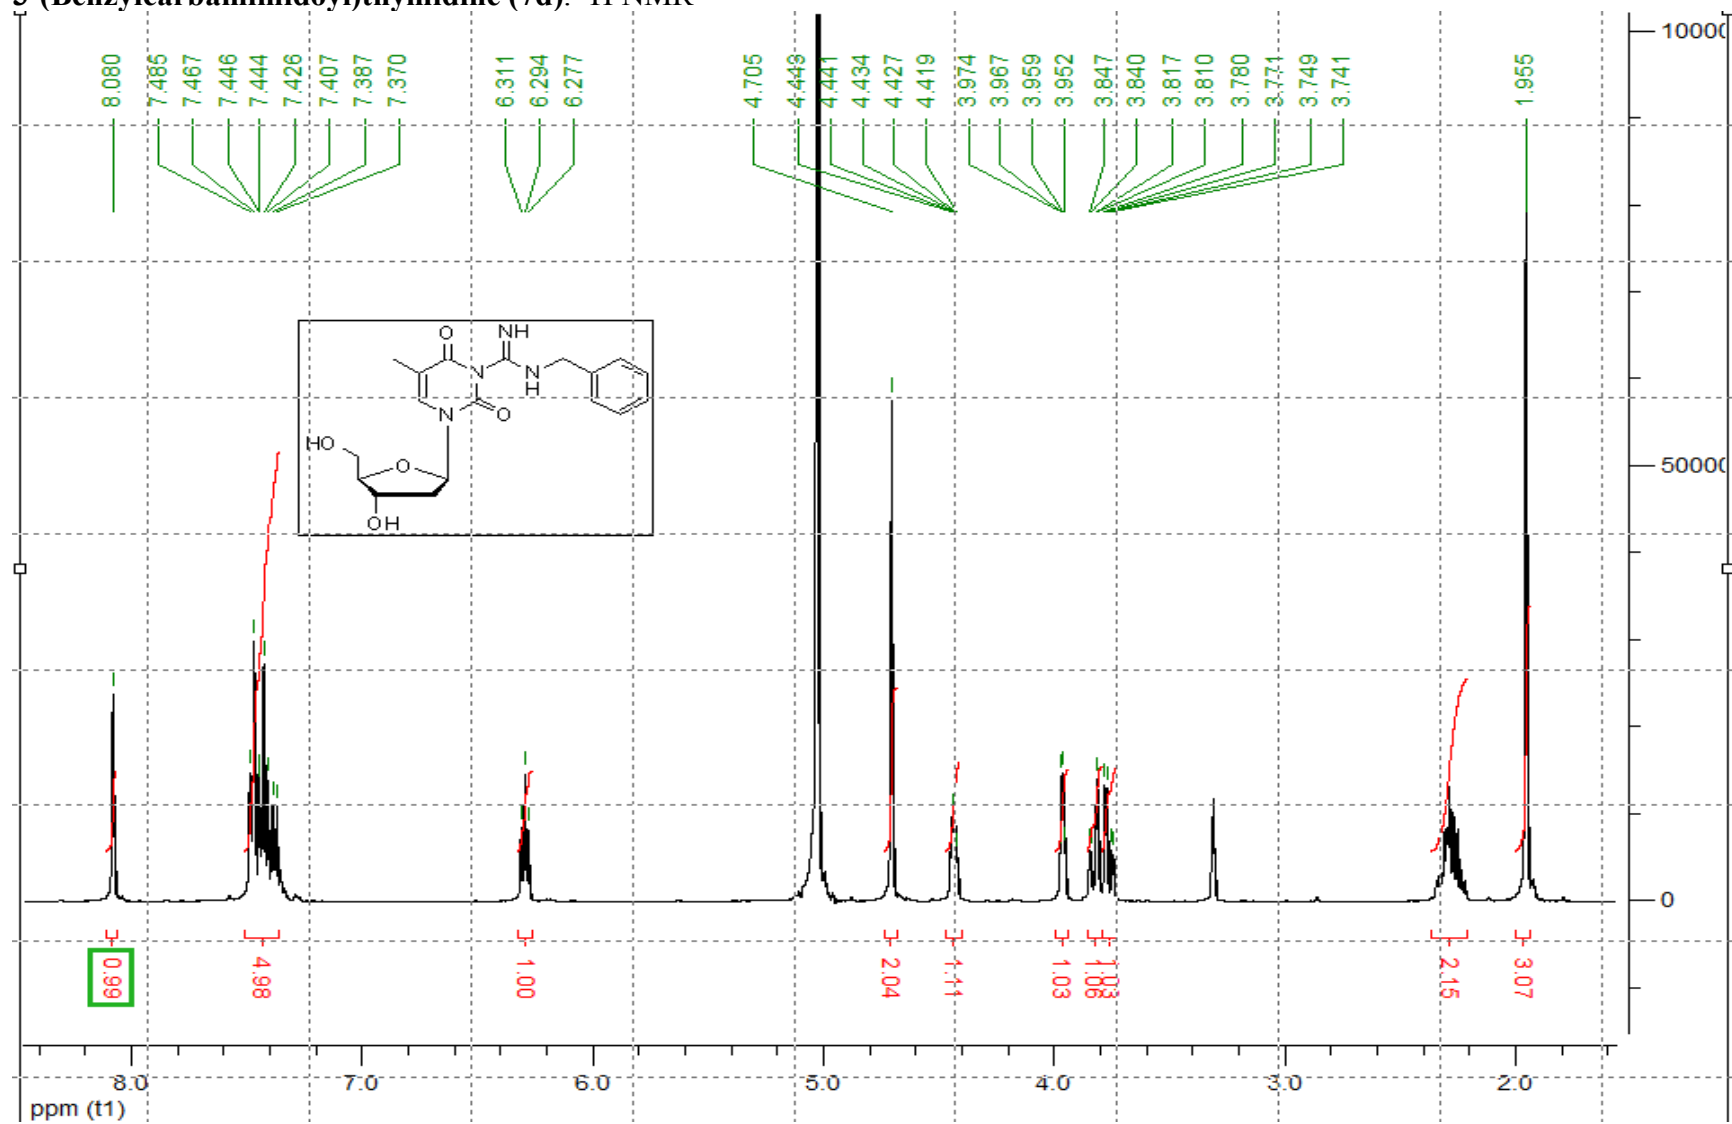

3-(Benzylcarbamidoyl)thymidine (7d). <sup>13</sup>C NMR

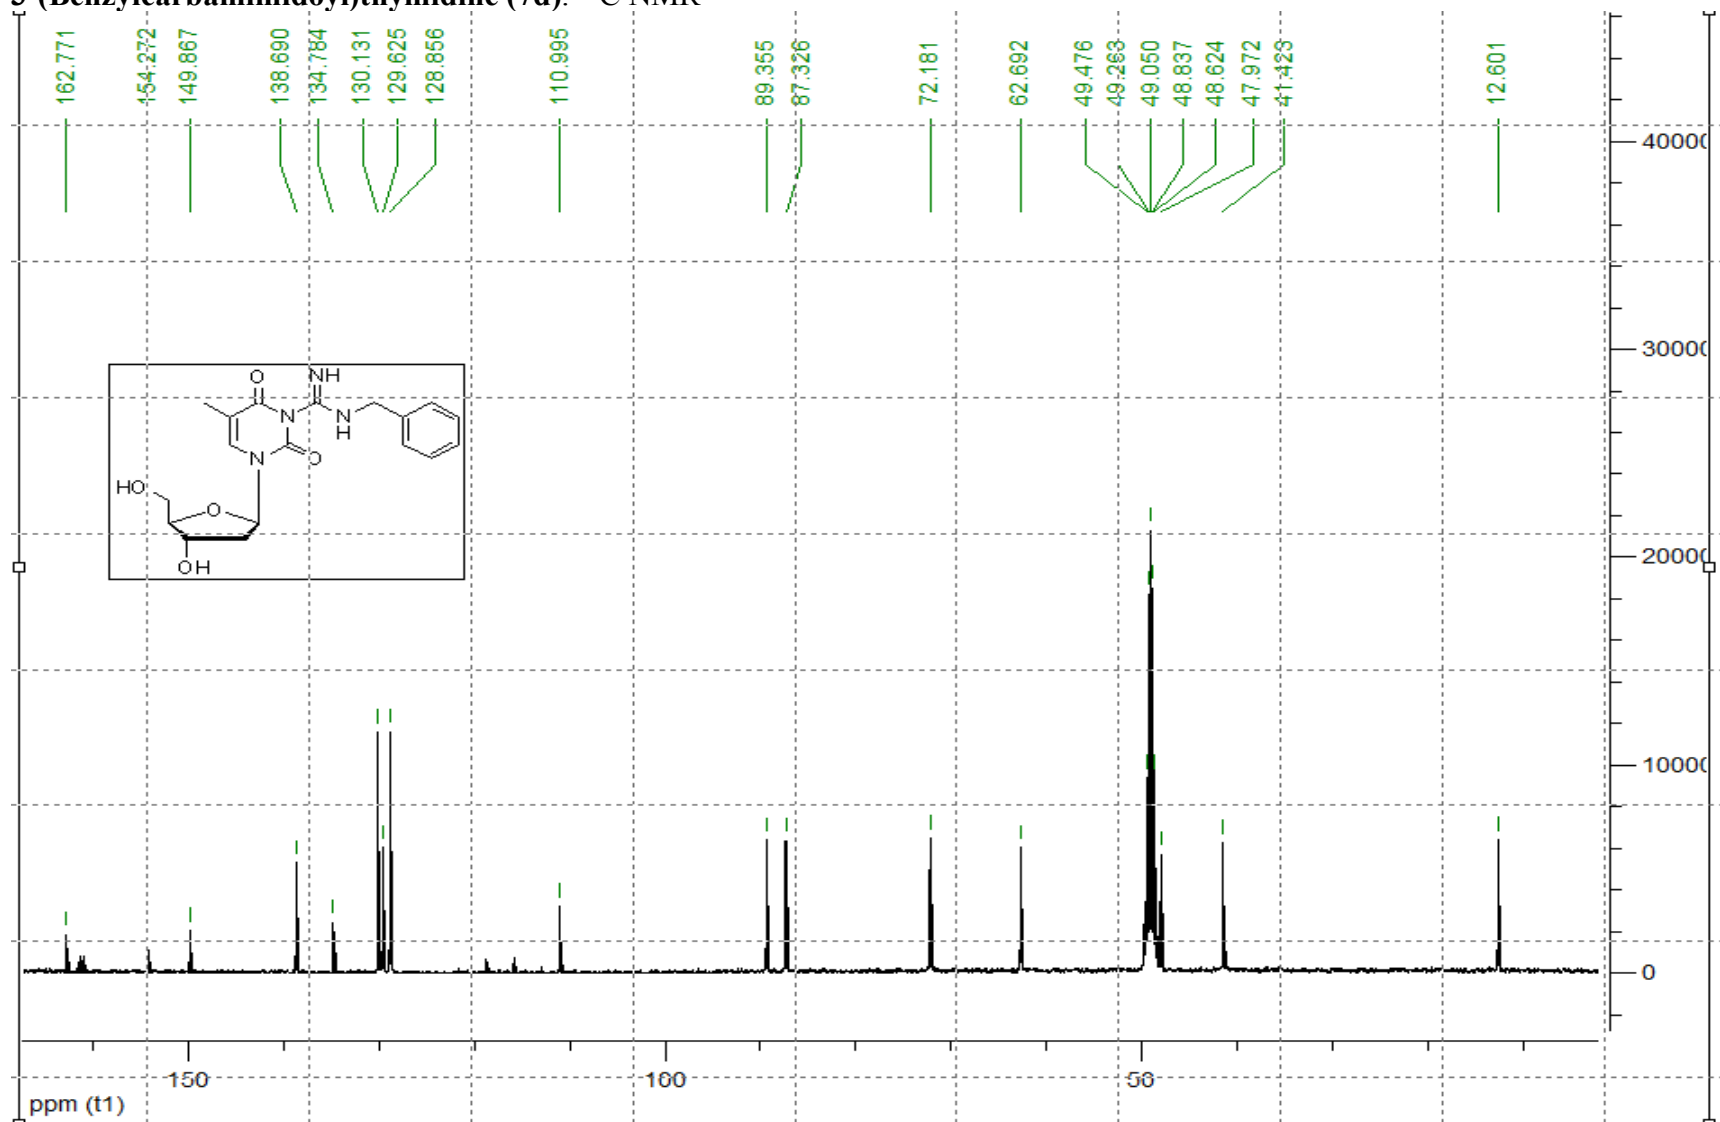

**3-(Benzylcarbamimidoyl)thymidine (7d).** HR-ESI-MS found: 375.1673

L090209G 279 (5.117) AM (Cen,4, 80.00, Ar,5000.0,0.00,0.70); Sm (SG, 2x3.00); Sm (SG, 2x3.00); Cm (244:378)

TOF MS ES+  
2.96e5

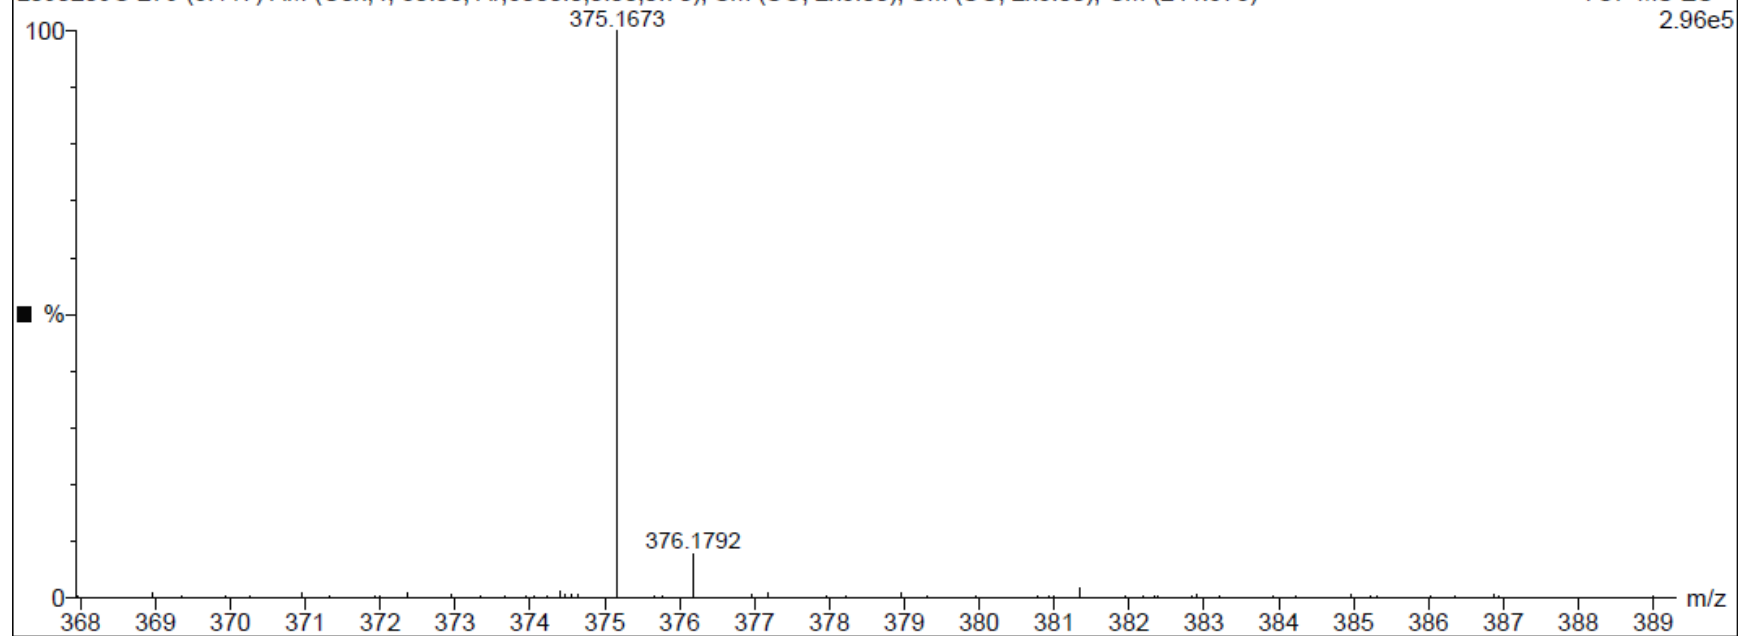

**3-(Benzylcarbamimidoyl)thymidine (7d).** Analytical traces in Water:Acetonitrile gradient

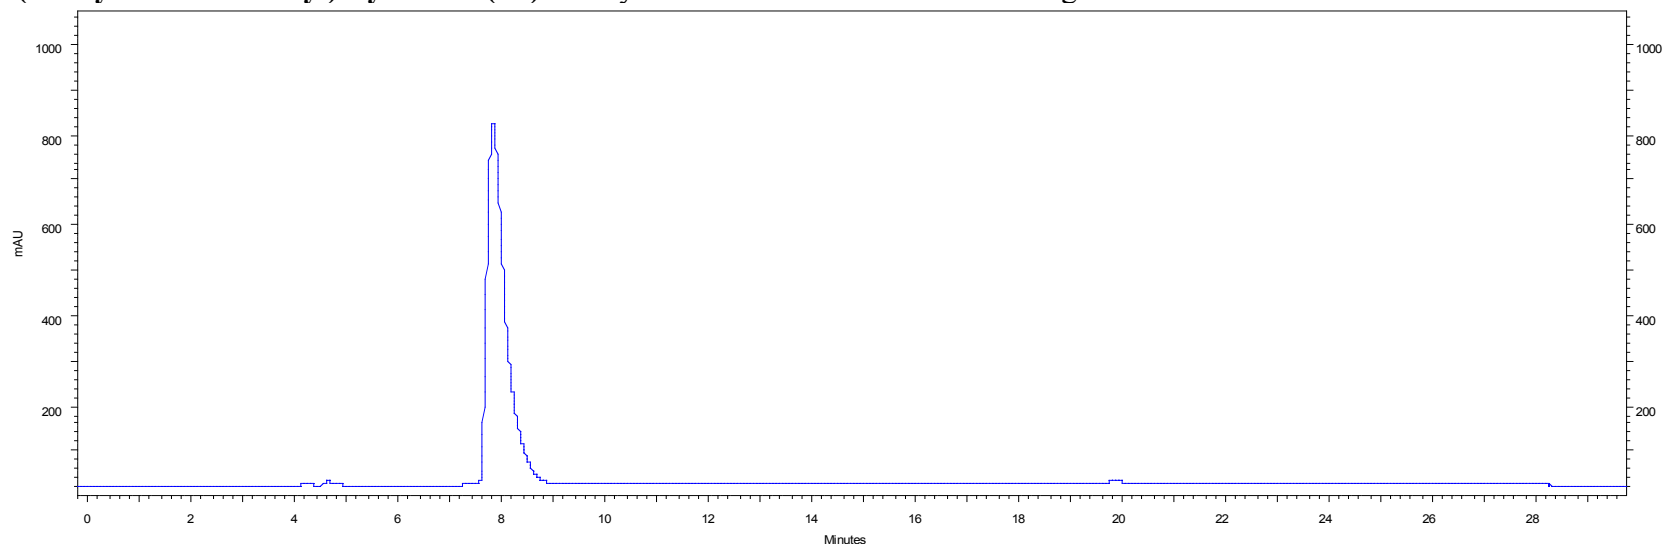

Analytical traces in Water:Methanol gradient

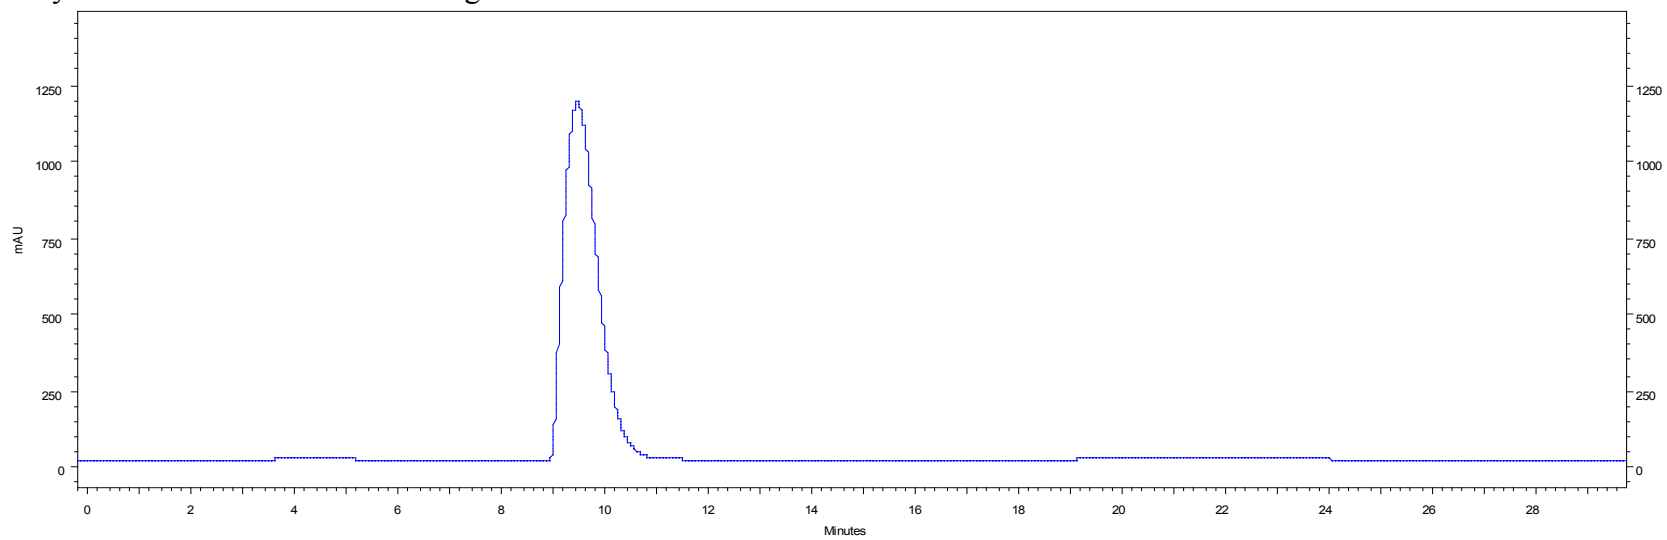

3-[2-(*closo*-1,7-Carboranyl)ethylcarbamimidoyl]thymidine (7e). <sup>1</sup>H NMR

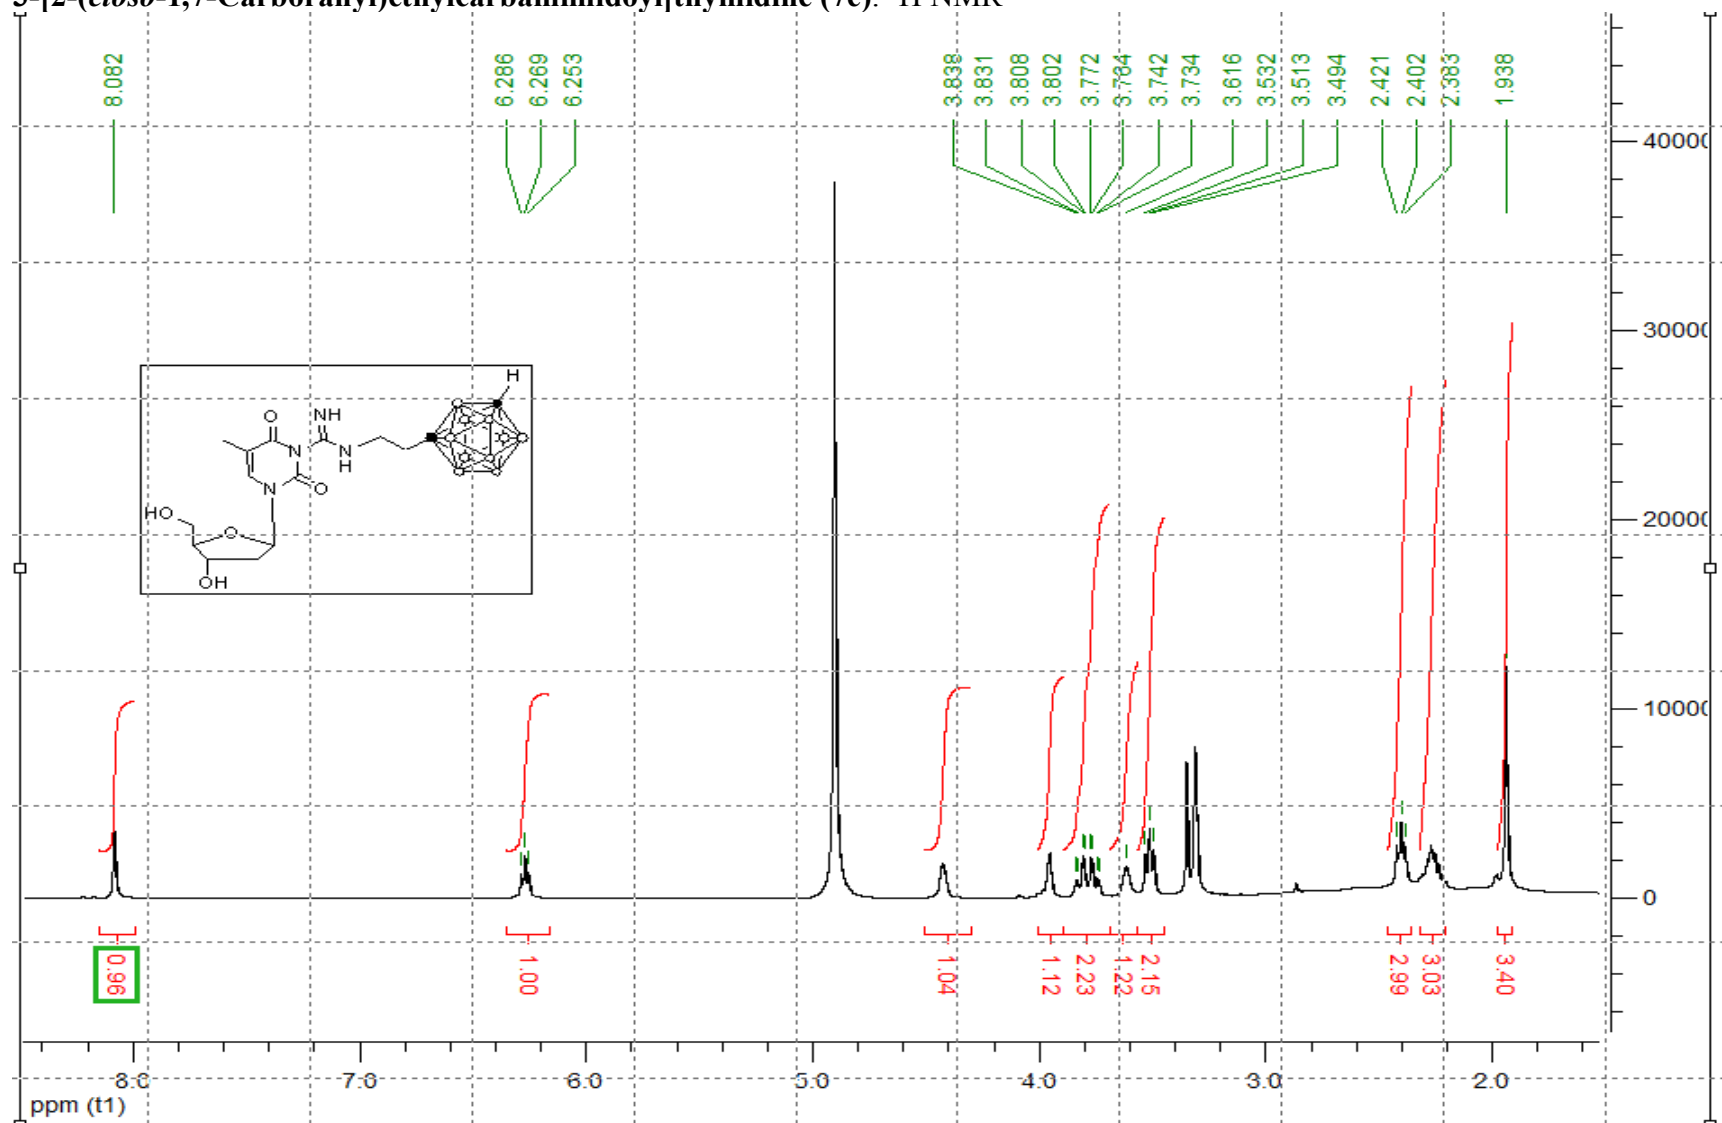

3-[2-(*closo*-1,7-Carboranyl)ethylcarbamimidoyl]thymidine (7e).  $^{13}\text{C}$  NMR

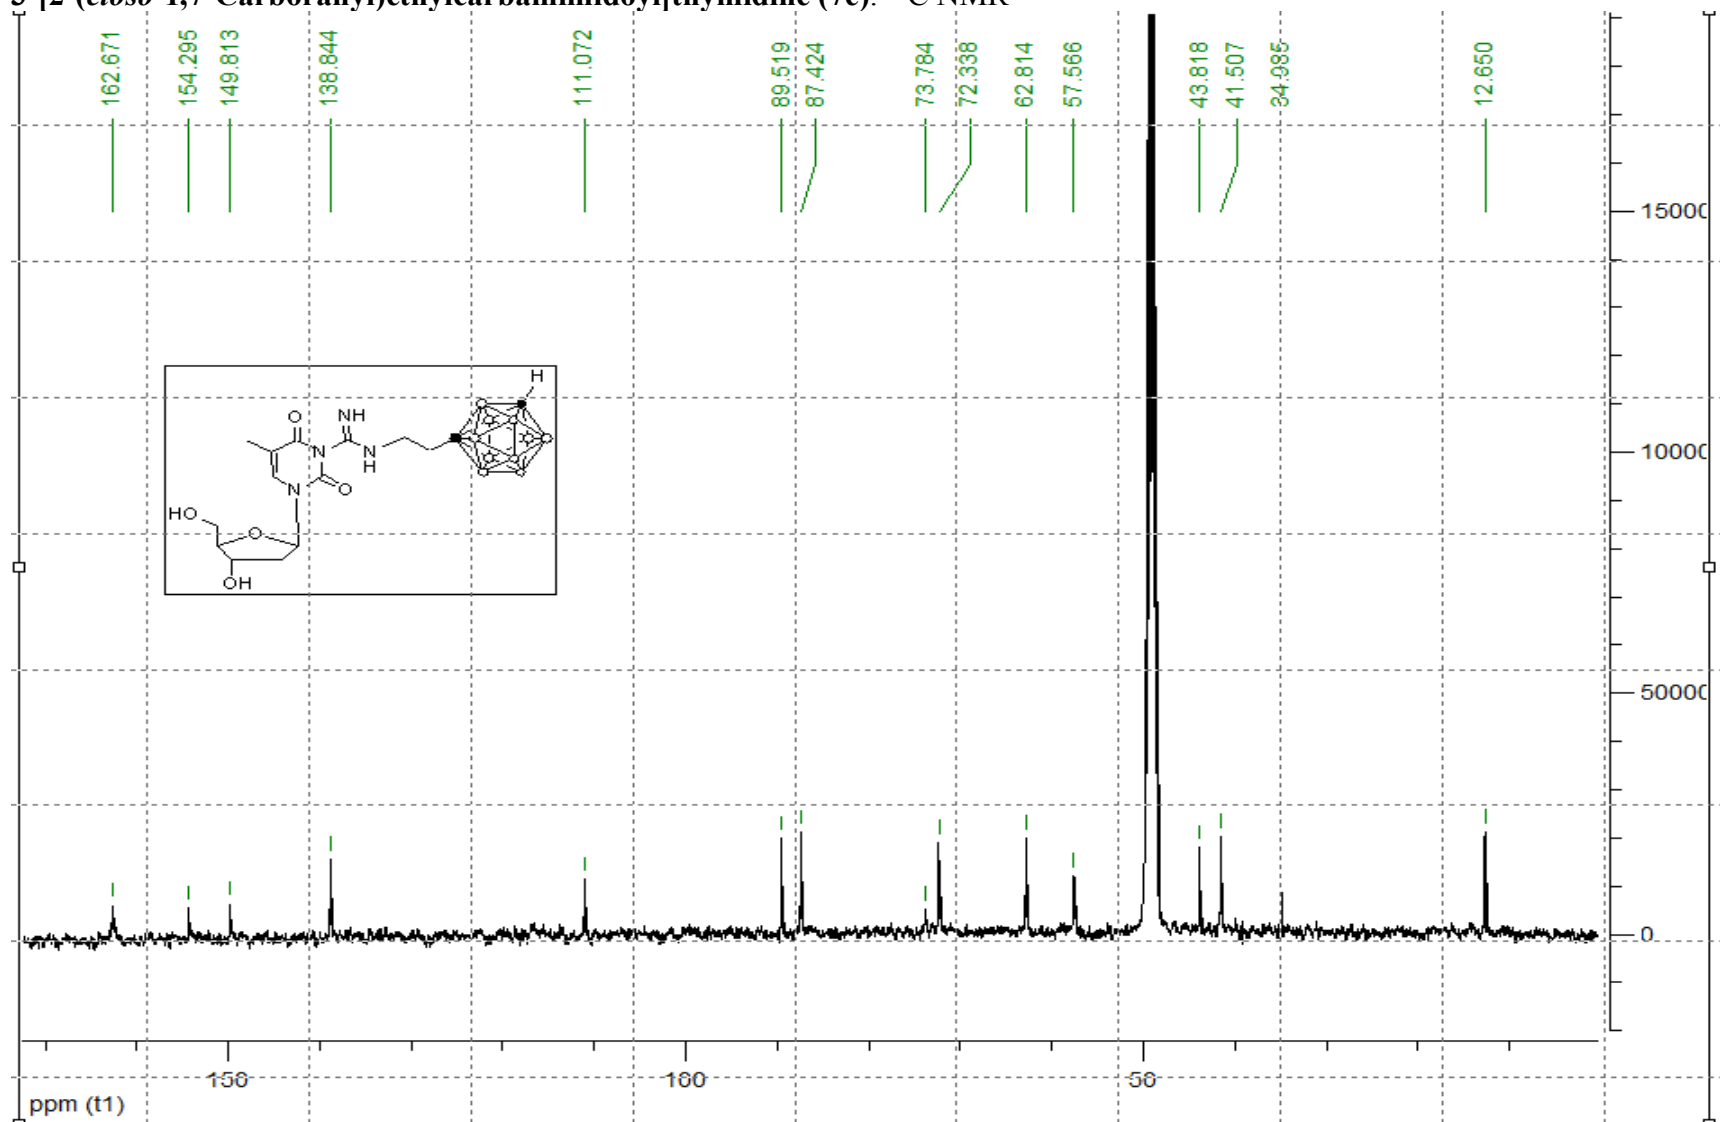

3-[2-(*closo*-1,7-Carboranyl)ethylcarbamimidoyl]thymidine (7e). HR-ESI-MS found: 455.3270

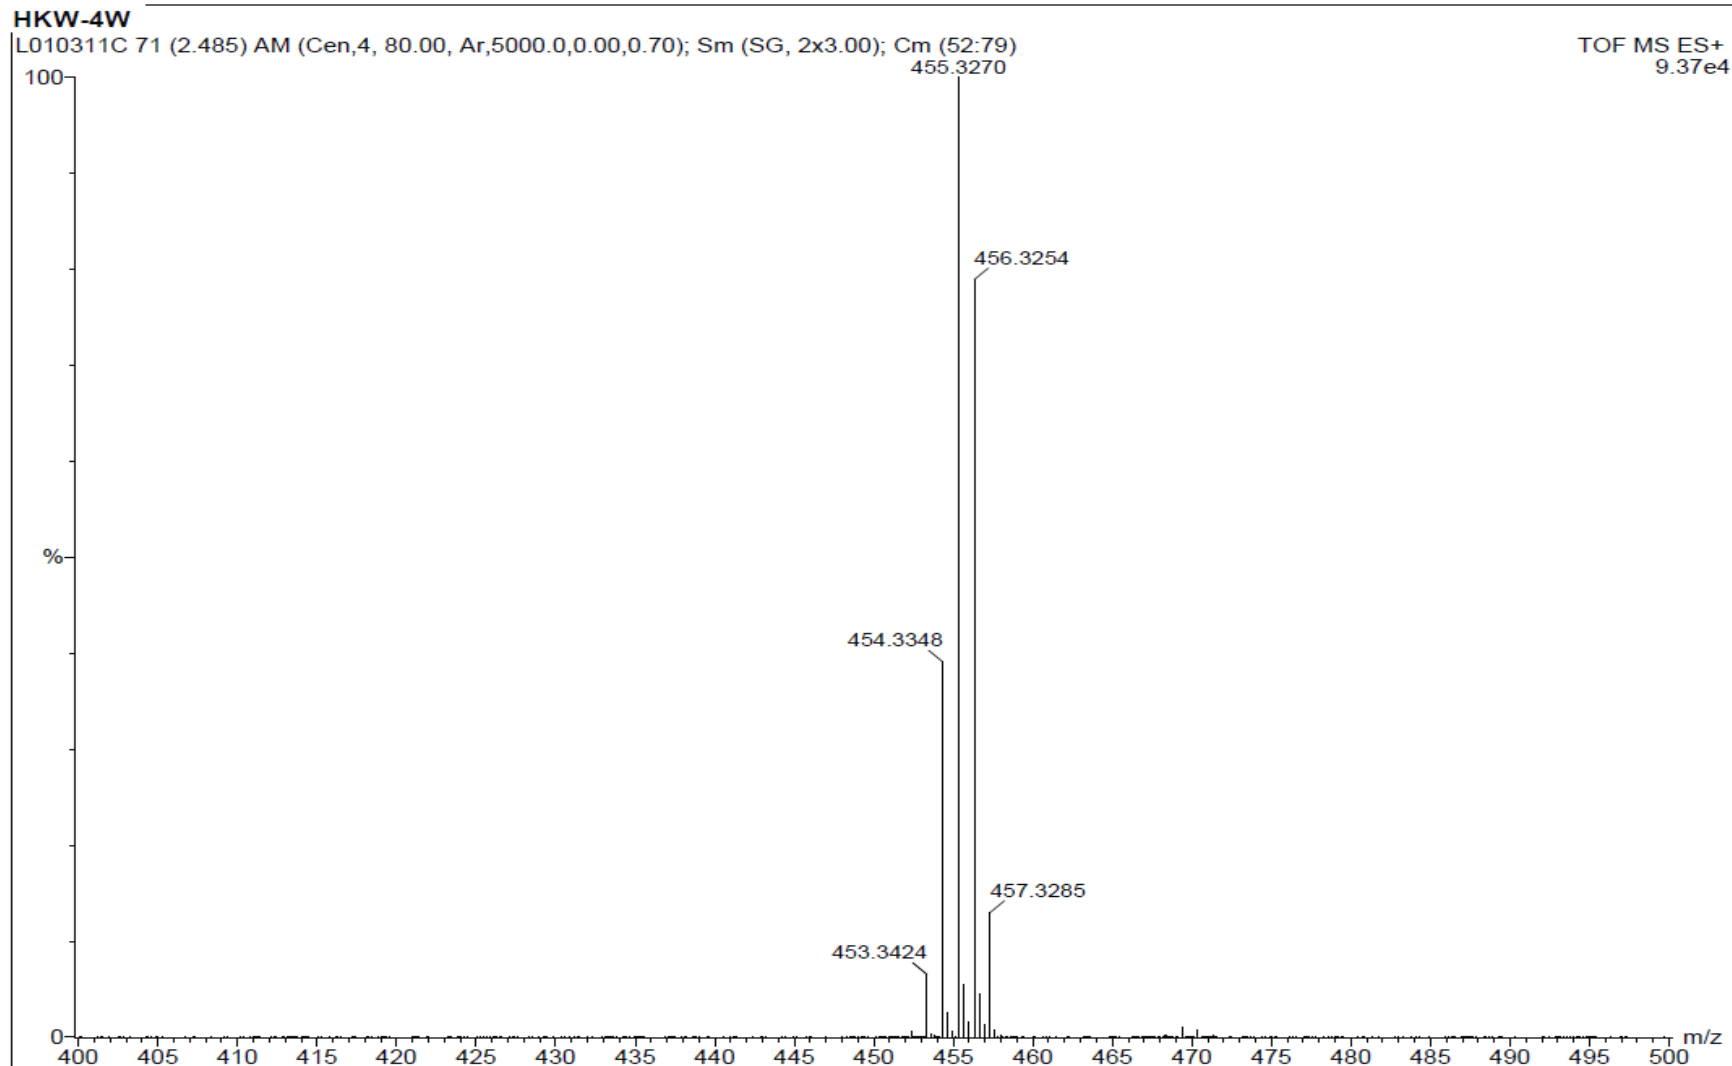



**3-[2-(*closo*-1,7-Carboranyl)ethylcarbamimidoyl]thymidine (7e).** Analytical traces in Water:Acetonitrile gradient

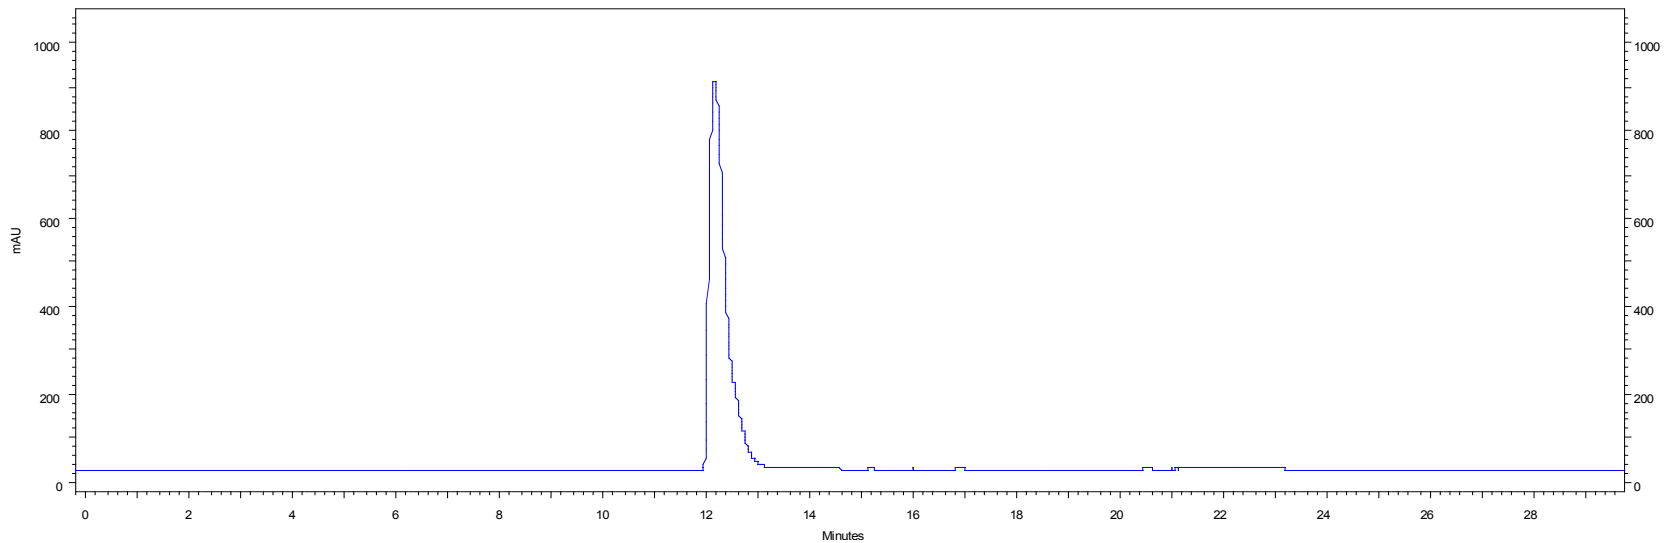

Analytical traces in Water:Methanol gradient

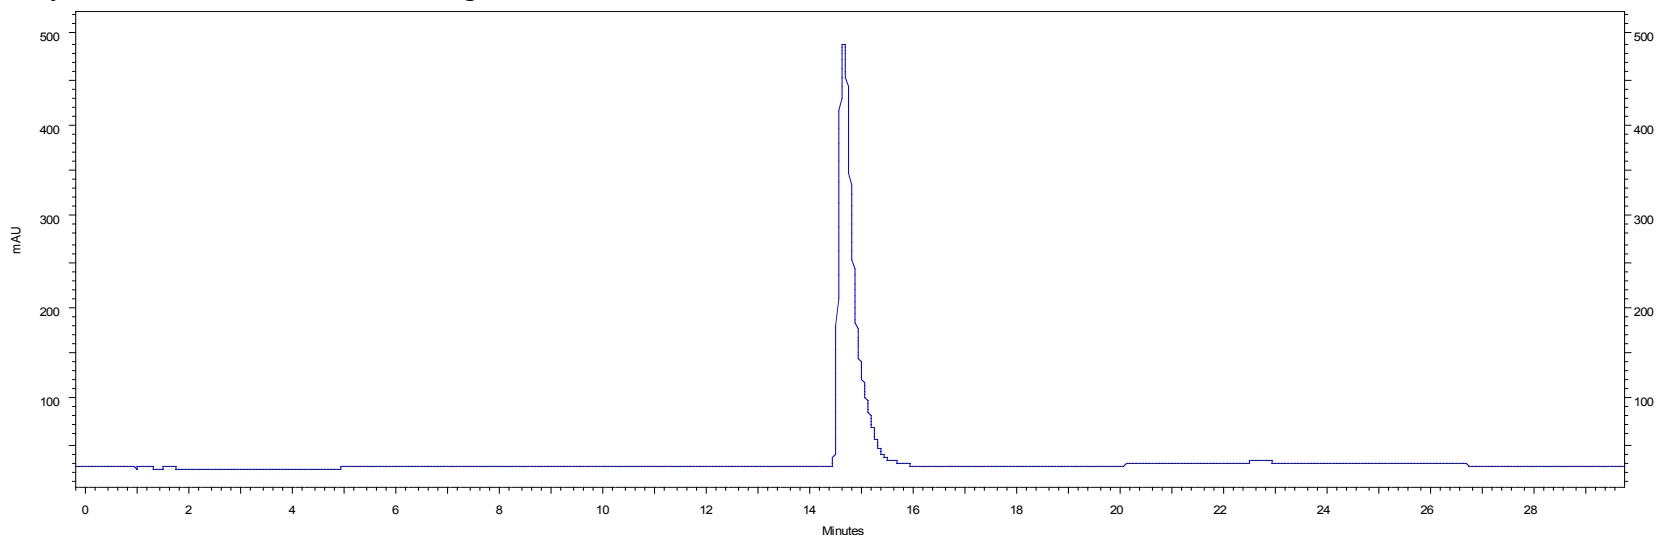

3-[3-(*closo*-1,7-Carboranyl)propylcarbamimidoyl]thymidine (7f). <sup>1</sup>H NMR

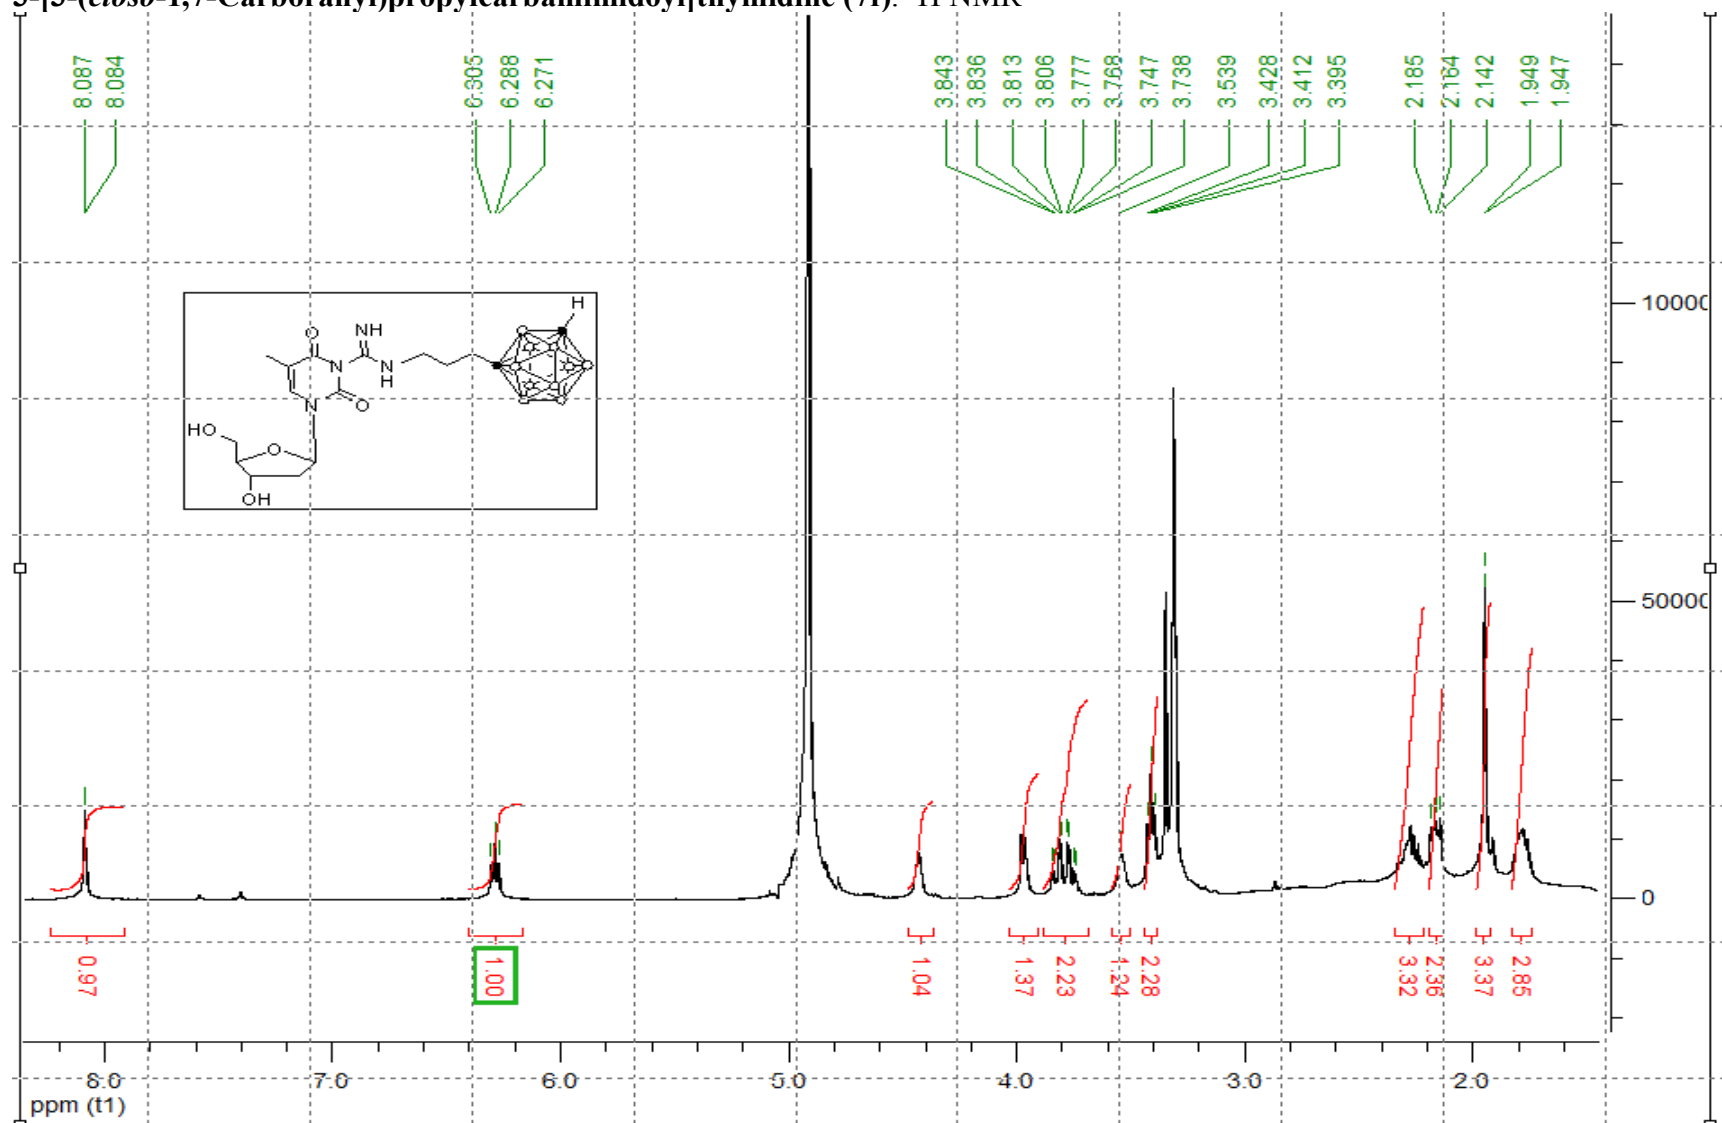

3-[3-(*closo*-1,7-Carboranyl)propylcarbamimidoyl]thymidine (7f). <sup>13</sup>C NMR

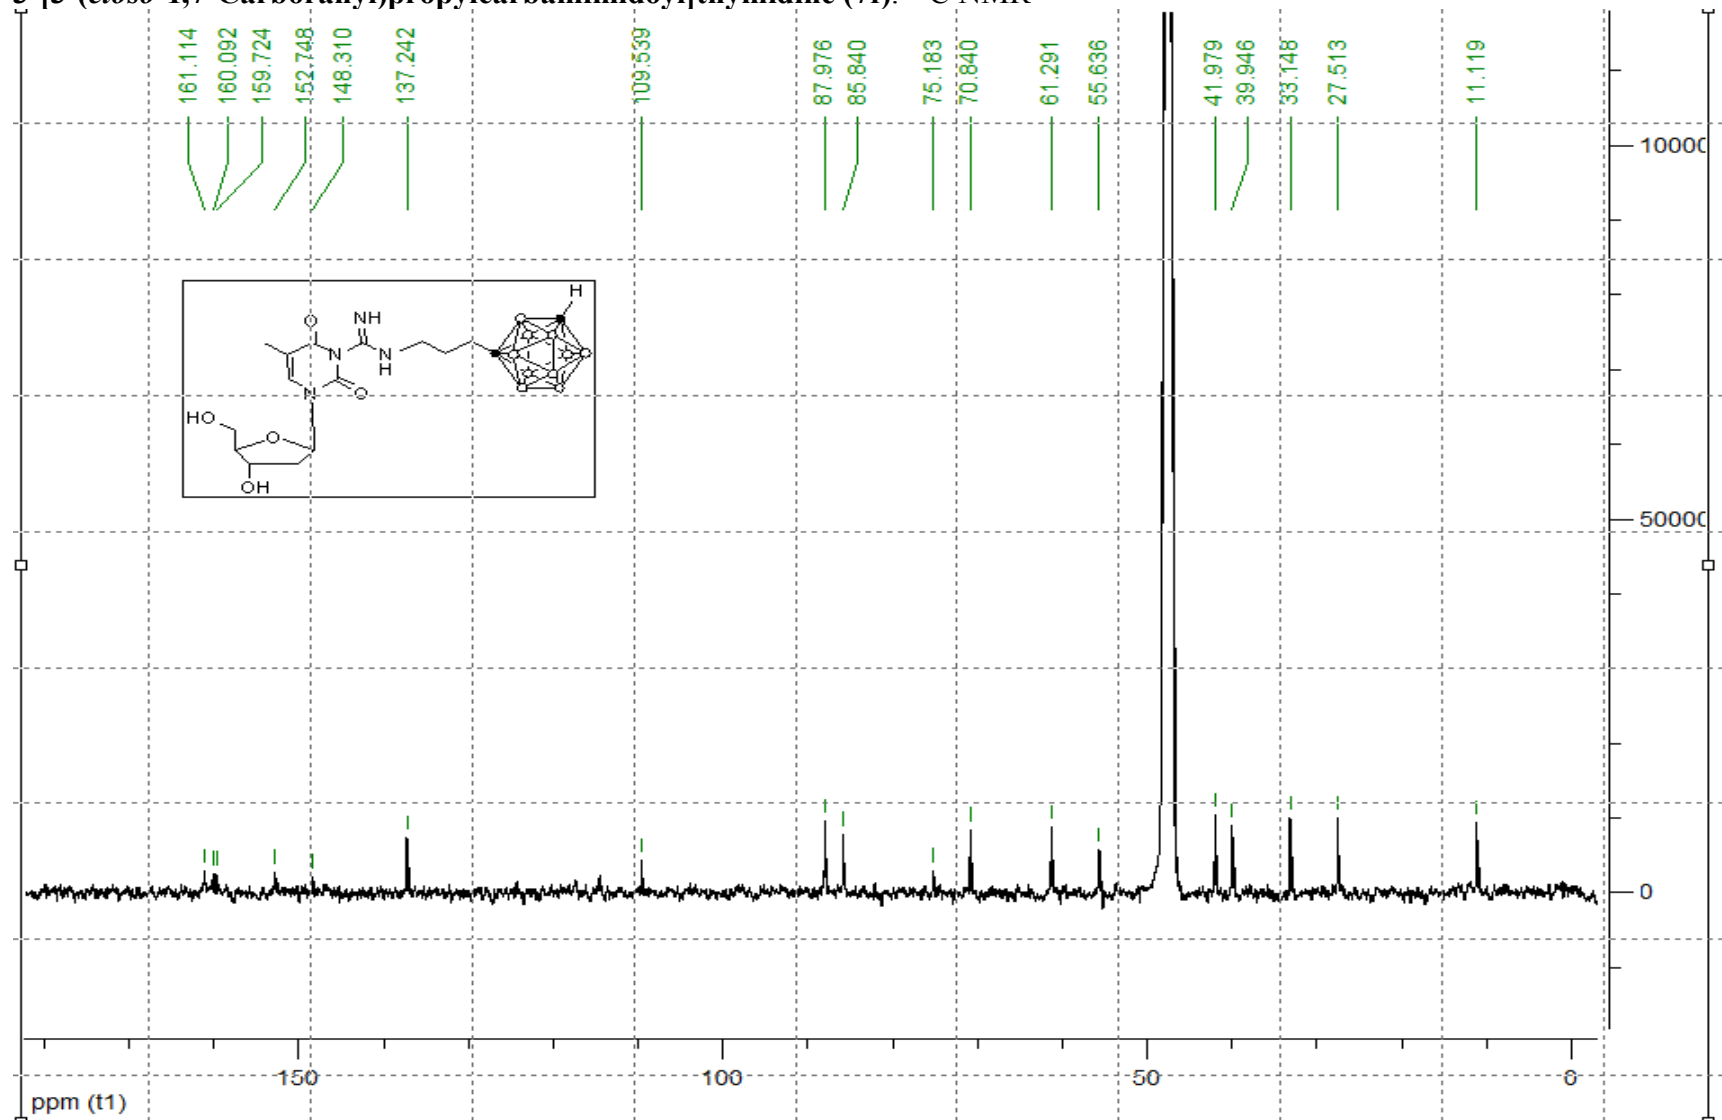

**3-[3-(*closo*-1,7-Carboranyl)propylcarbamiidoyl]thymidine (7f).** HR-ESI-MS found: 469.3382.

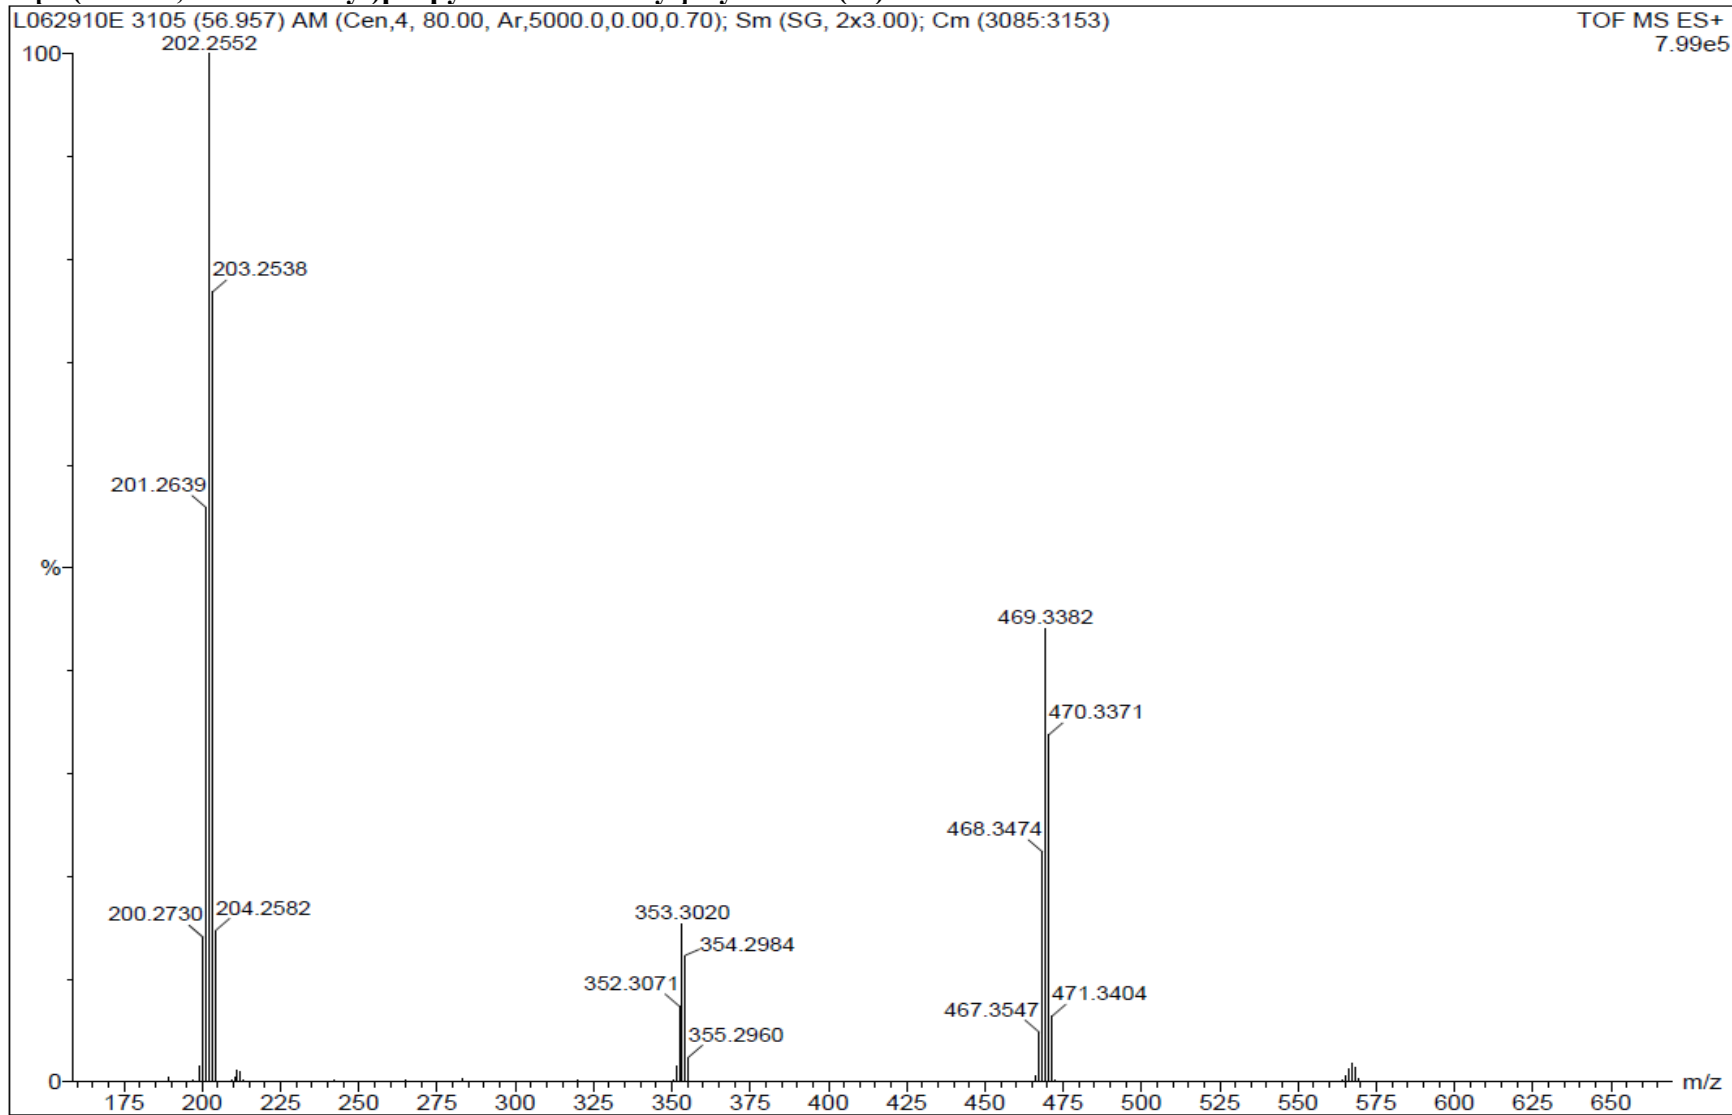

**3-[3-(*closo*-1,7-Carboranyl)propylcarbamimidoyl]thymidine (7f).** Analytical traces in Water:Acetonitrile gradient

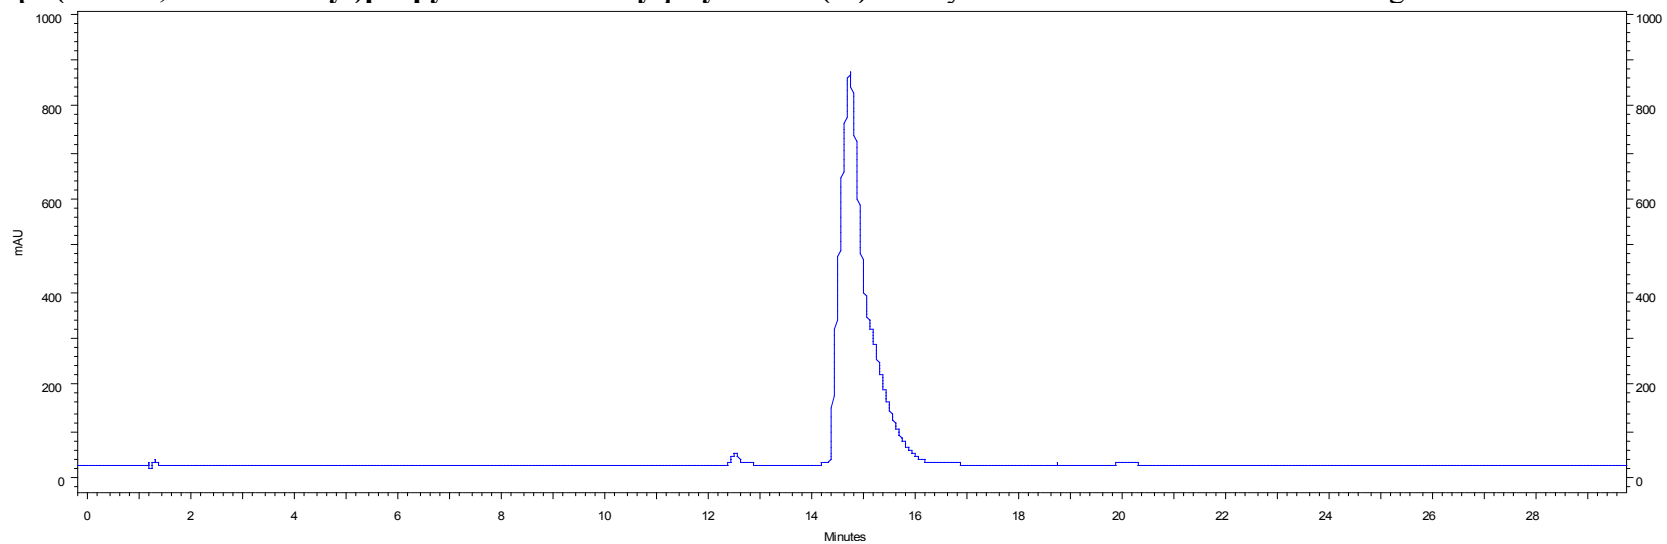

Analytical traces in Water:Methanol gradient

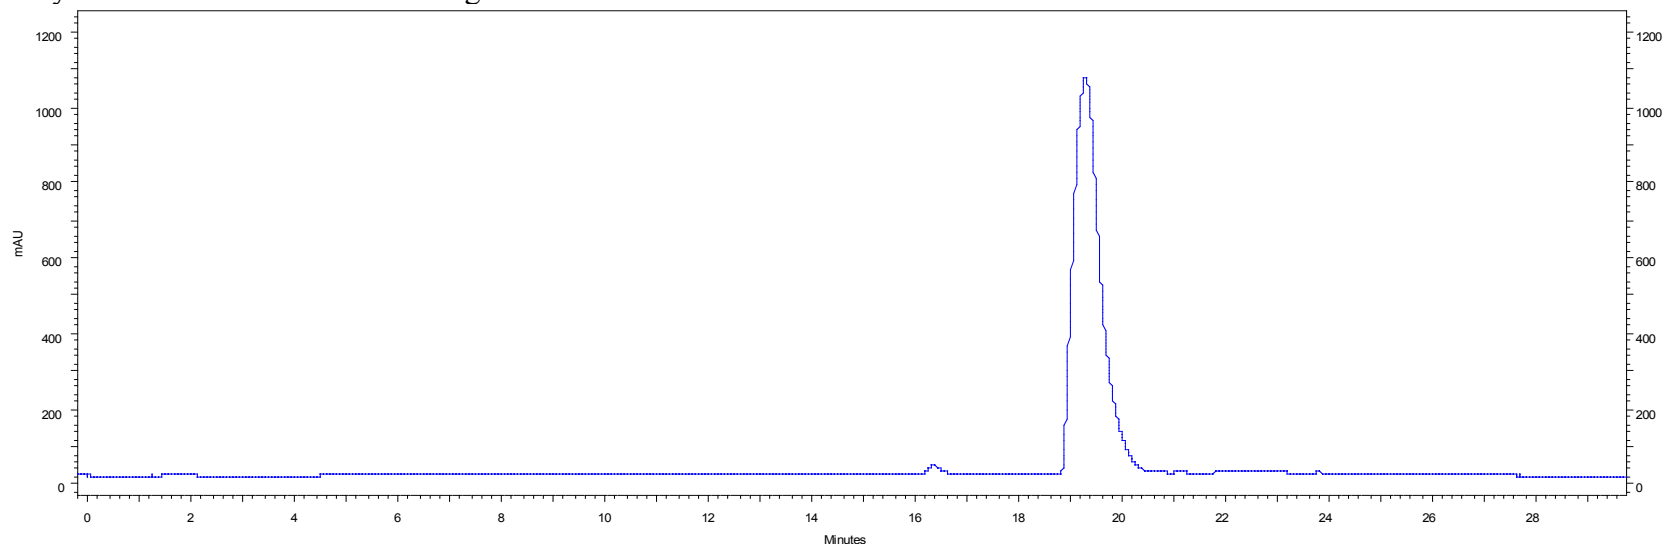

3-[4-(*closo*-1,7-Carboranyl)butylcarbamimidoyl]thymidine (7g). <sup>1</sup>H NMR

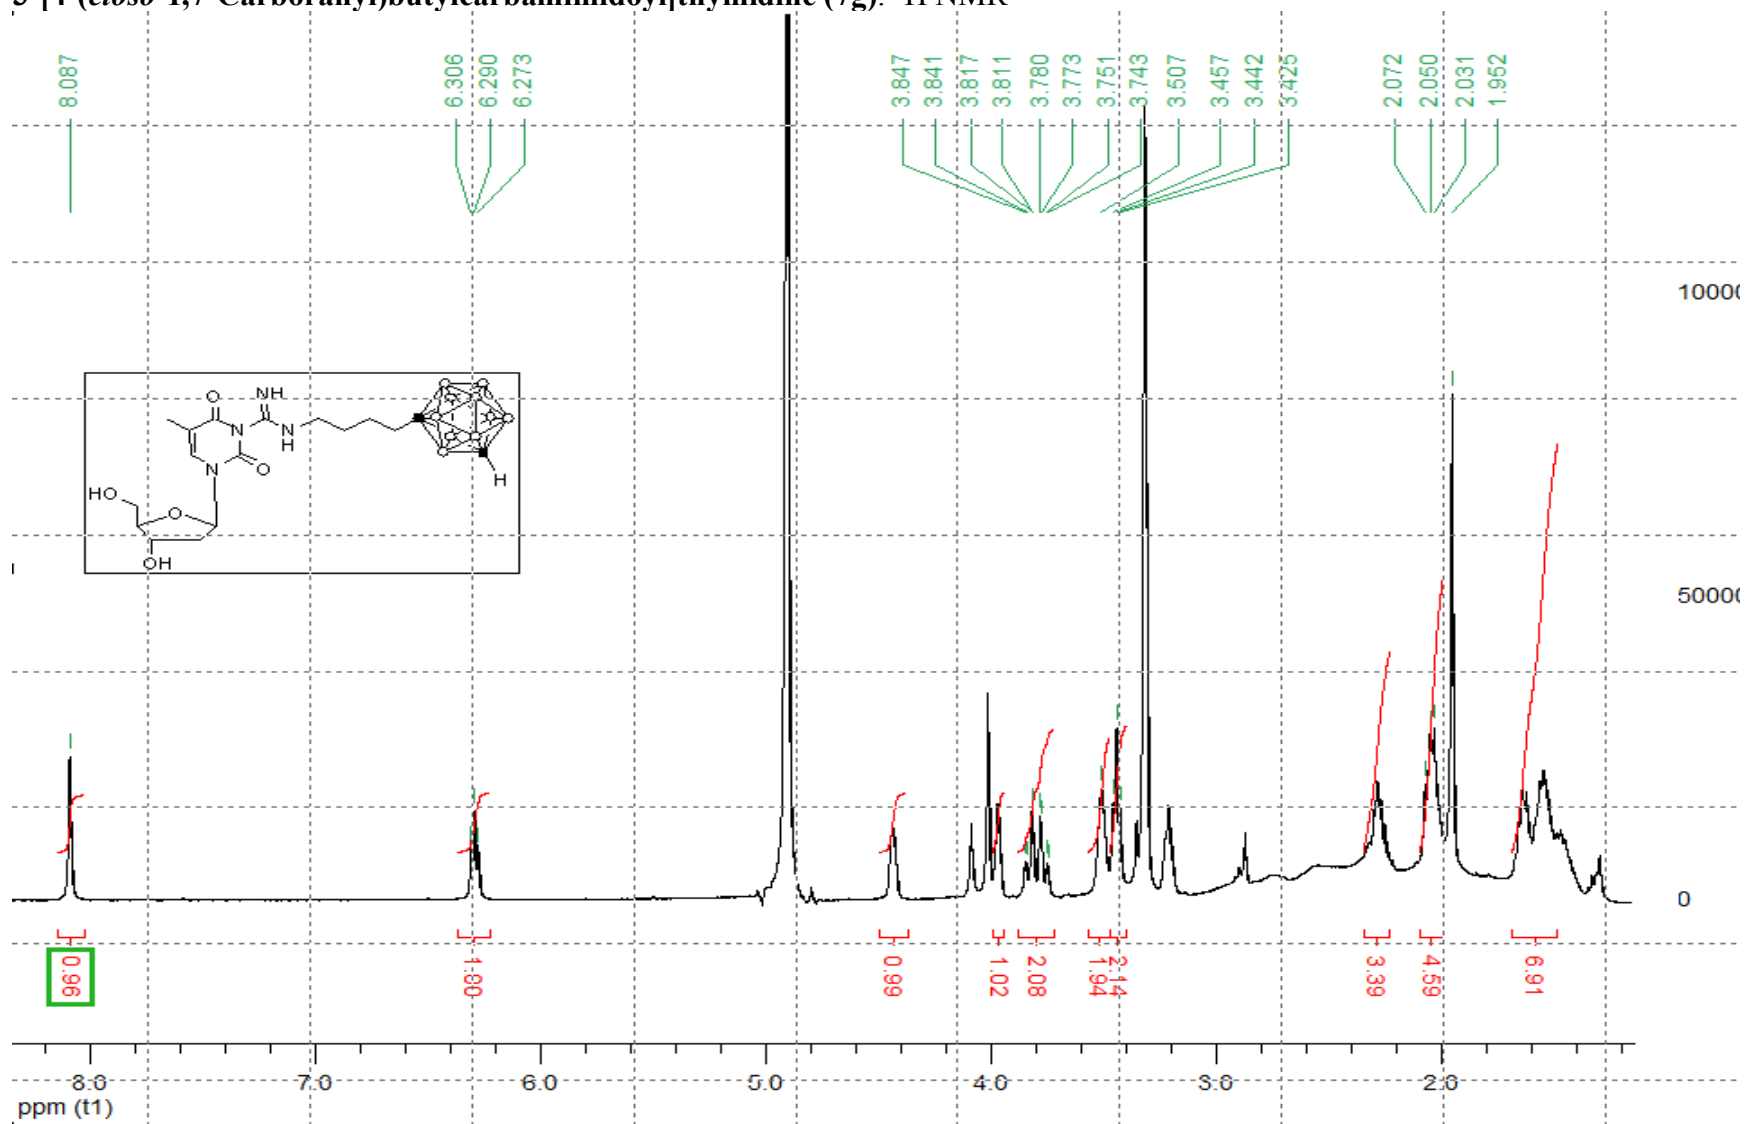

3-[4-(*closo*-1,7-Carboranyl)butylcarbamimidoyl]thymidine (7g).  $^{13}\text{C}$  NMR

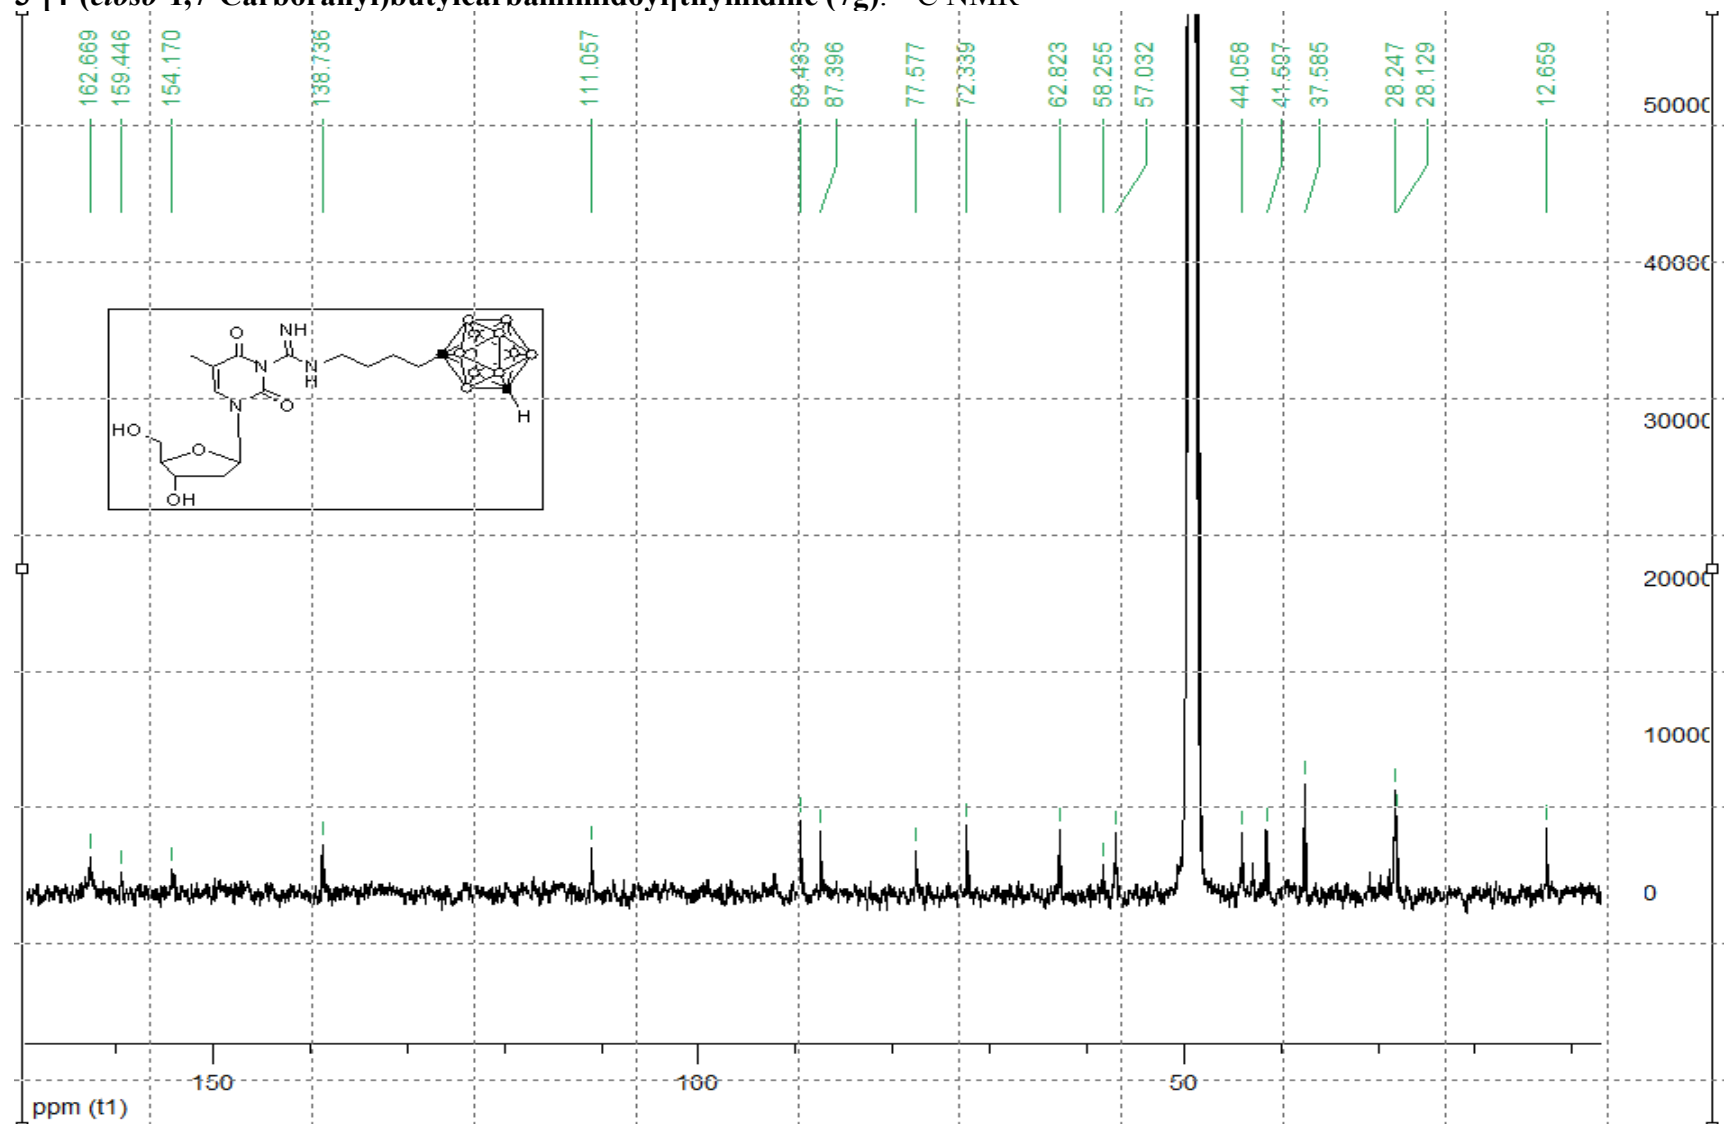

**3-[4-(*closo*-1,7-Carboranyl)butylcarbamimidoyl]thymidine (7g).** HR-ESI-MS found: 483.3558.

L102210C 231 (4.236) AM (Cen,4, 80.00, Ar,5000.0,0.00,0.70); Sm (SG, 2x3.00); Cm (173:236)

TOF MS ES+  
4.68e3

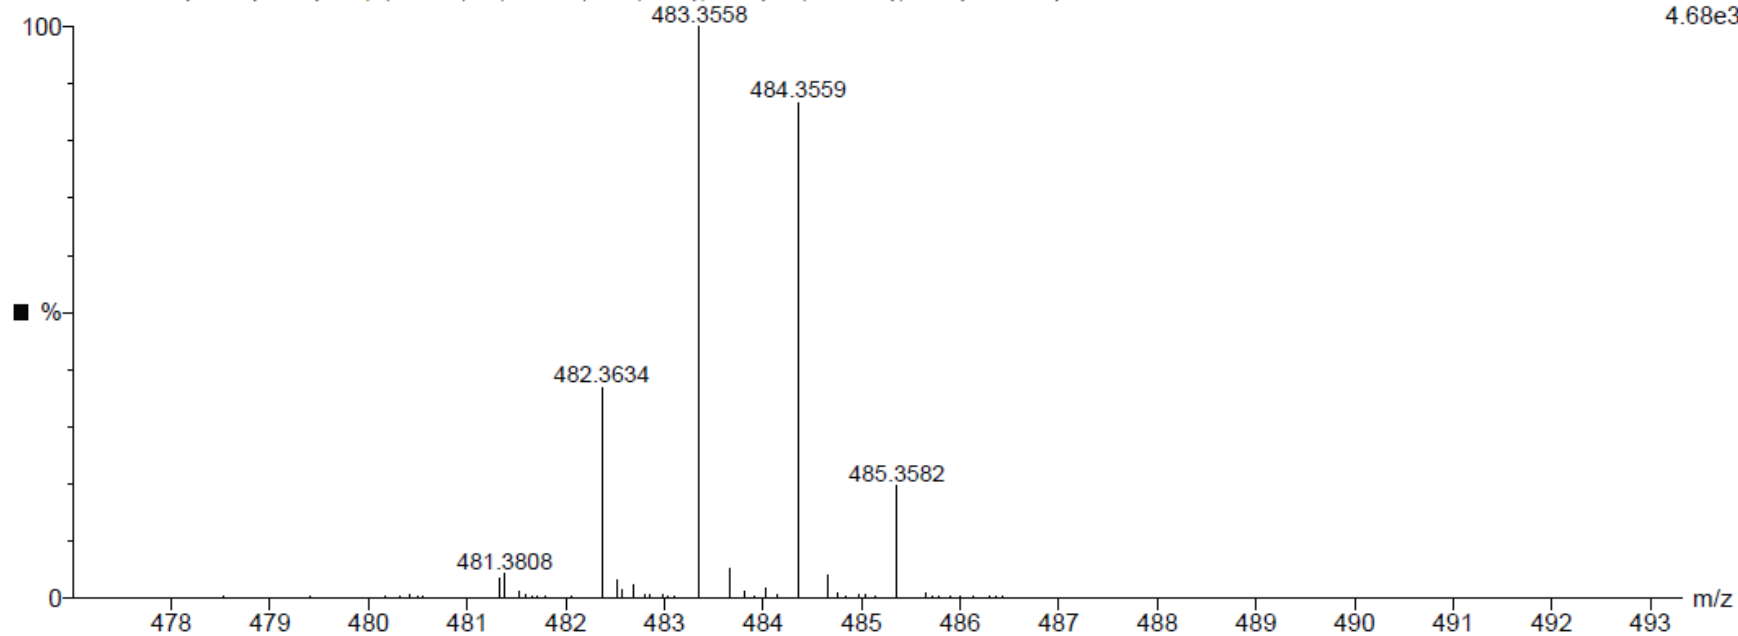



3-[4-(*closo*-1,7-Carboranyl)butylcarbamimidoyl]thymidine (7g). Analytical traces in Water:Acetonitrile gradient

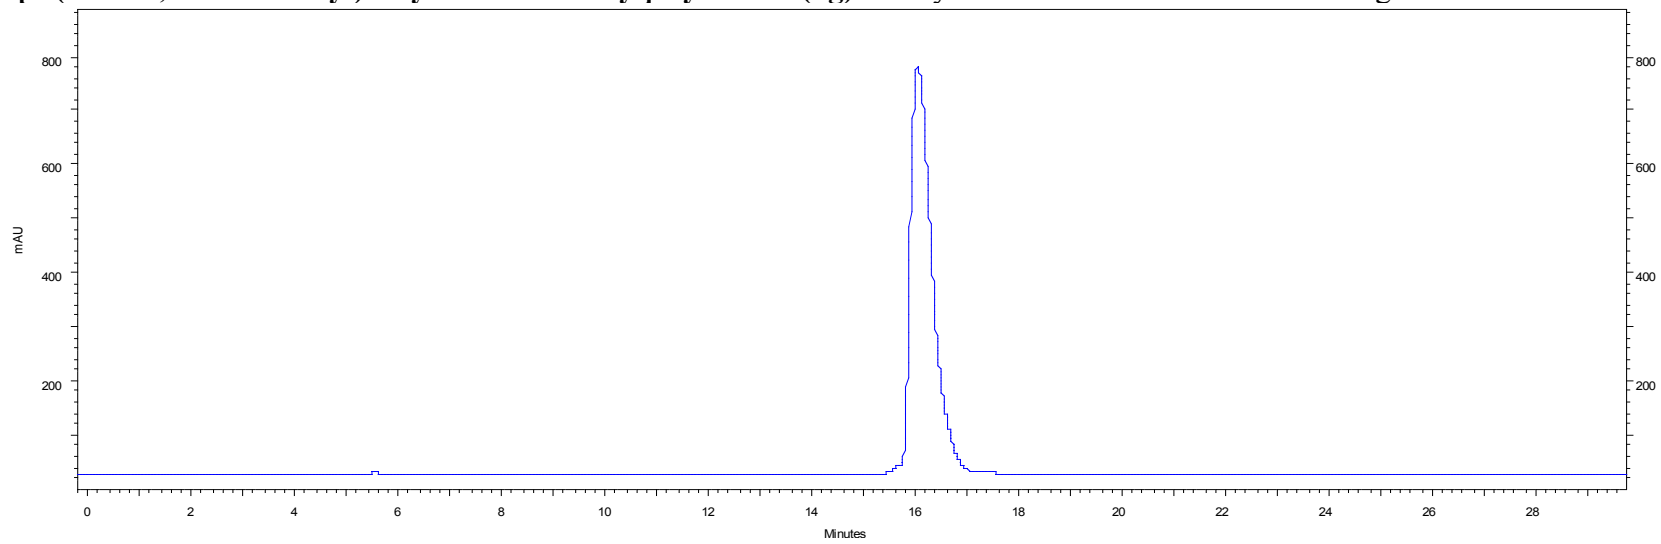

Analytical traces in Water:Methanol gradient

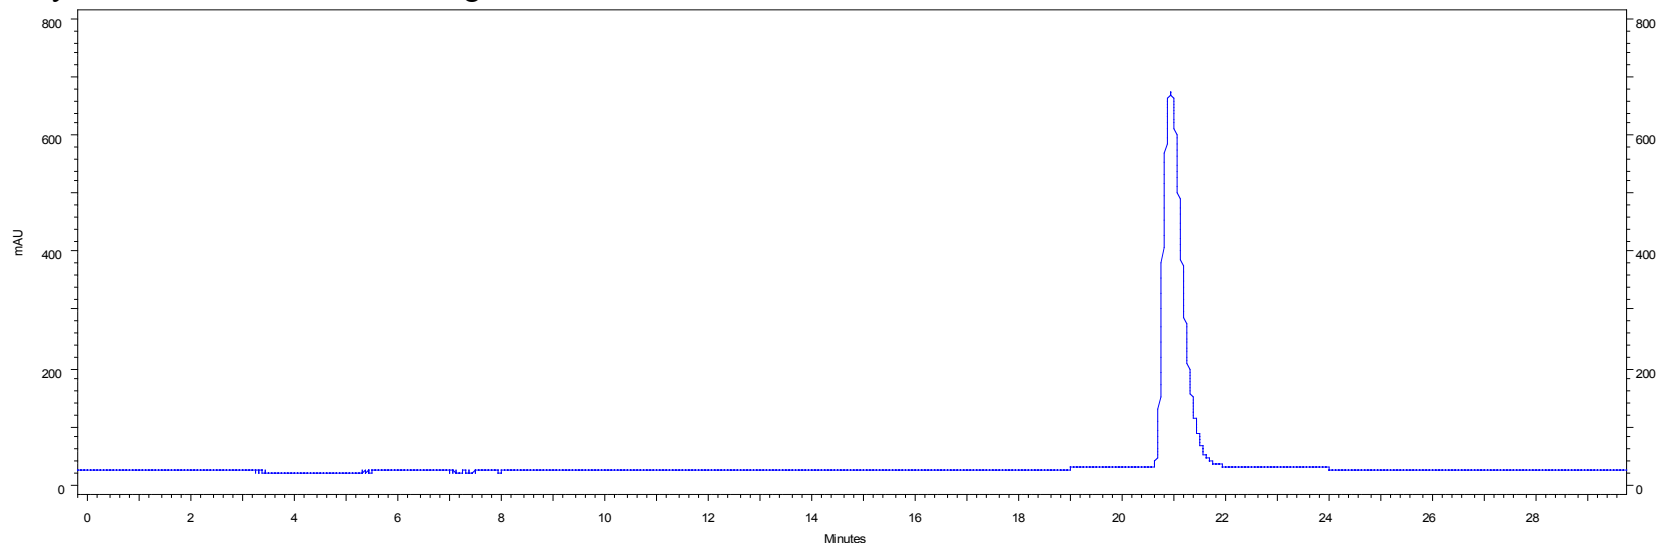

3-(Tetrazol-5-ylmethyl)thymidine (8). <sup>1</sup>H NMR

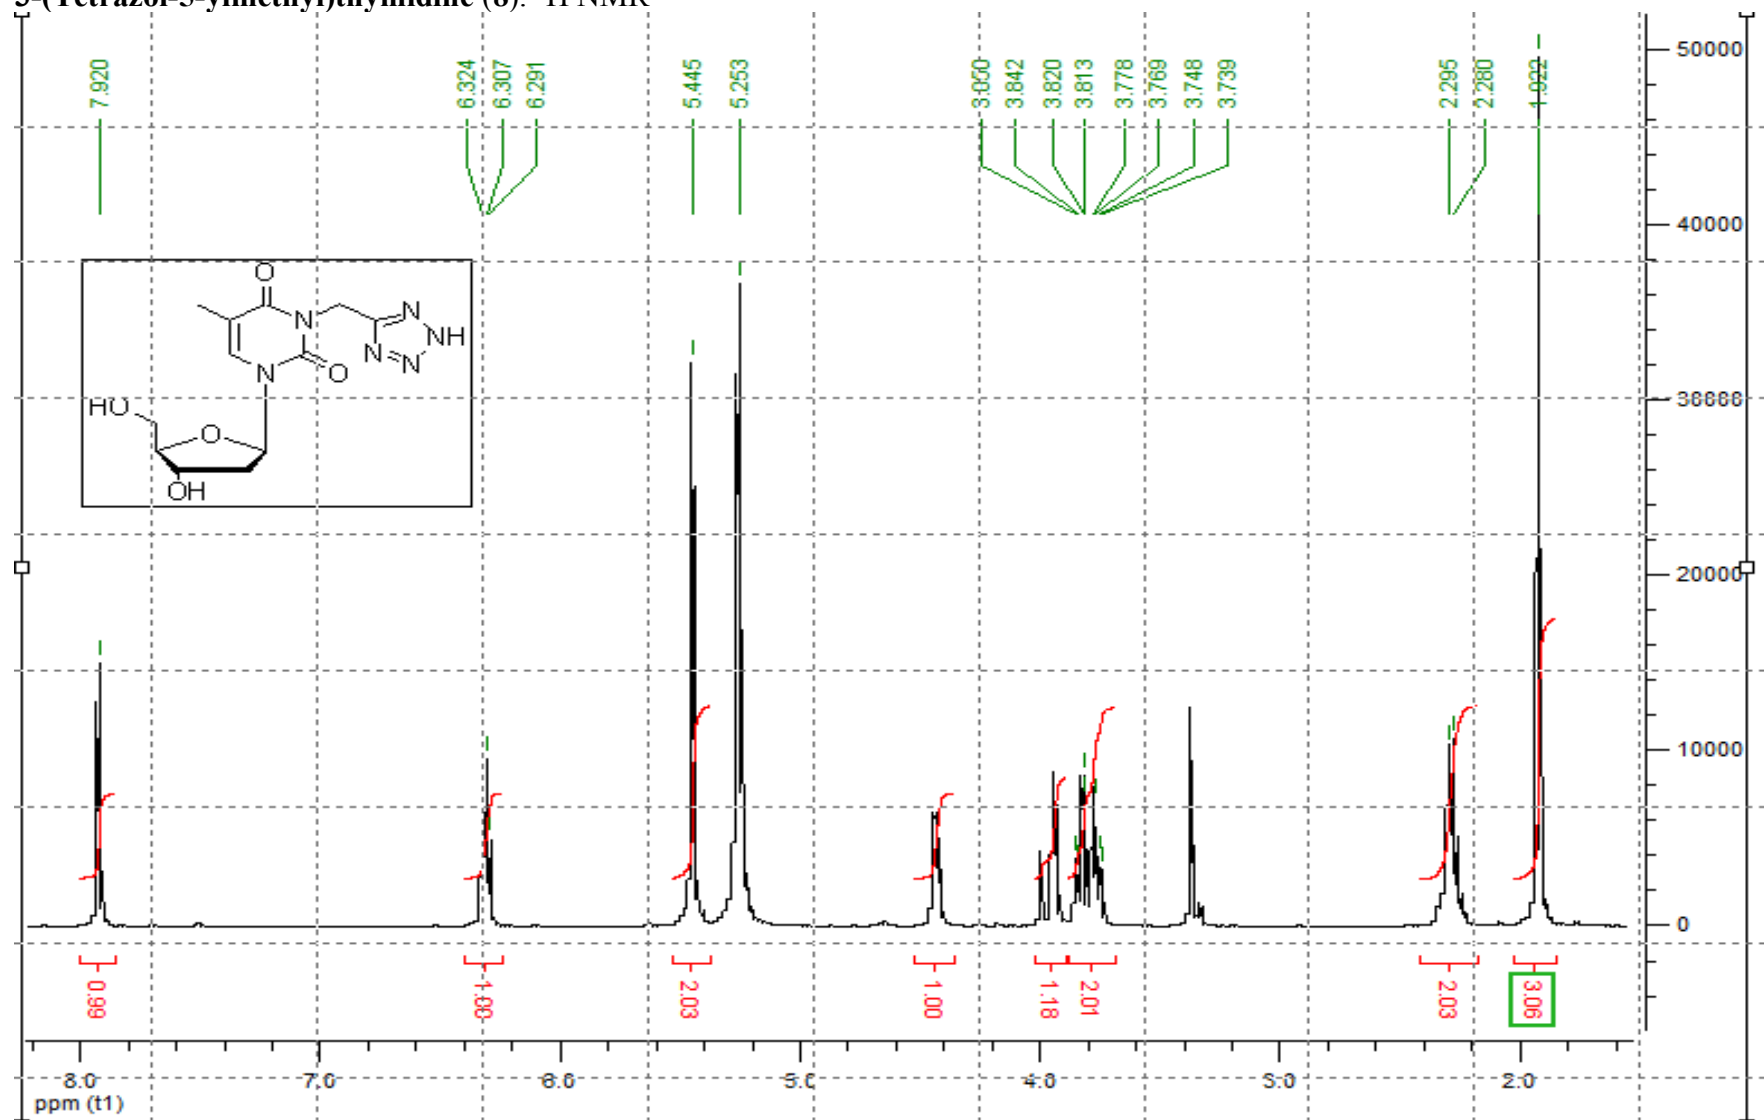

3-(Tetrazol-5-ylmethyl)thymidine (8).  $^{13}\text{C}$  NMR

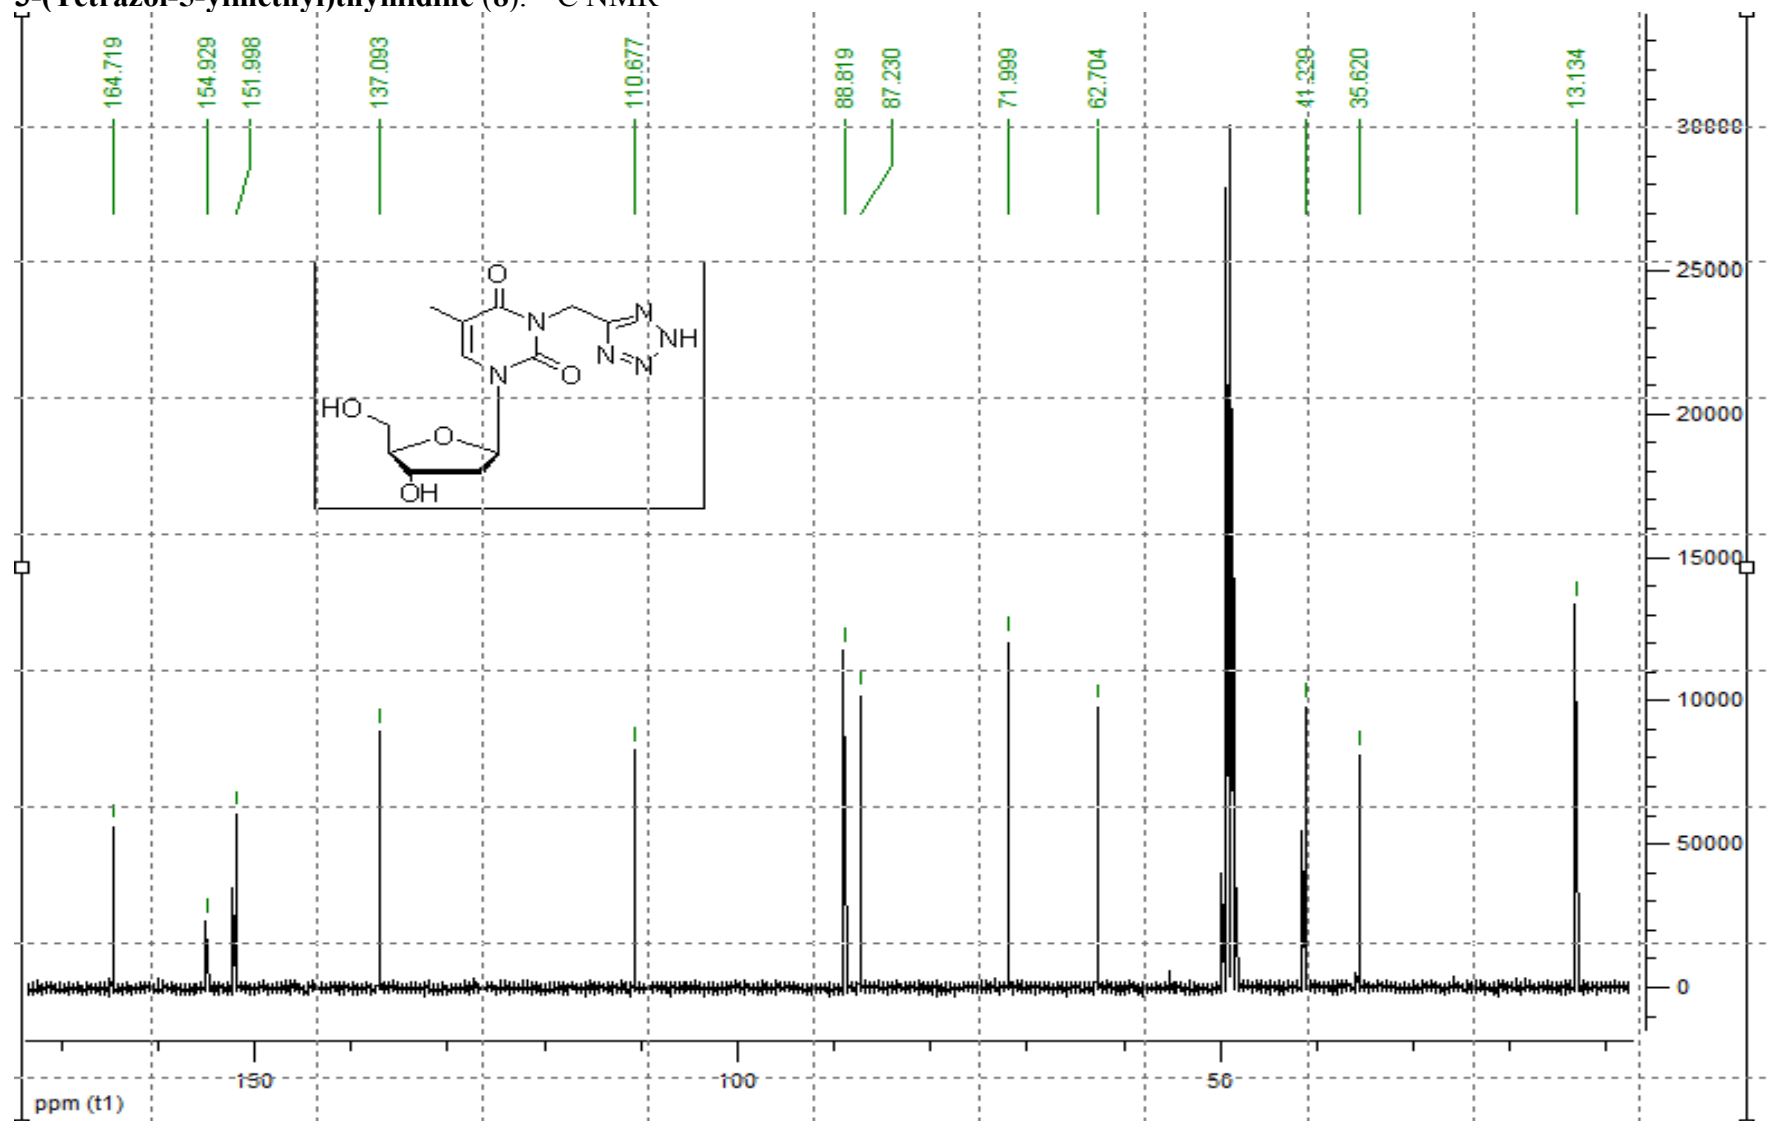

**3-(Tetrazol-5-ylmethyl)thymidine (8)**. HR-ESI-MS found: 325.1275, 347.1108 and 649.2494.

L070209D 178 (3.264) AM (Cen,4, 80.00, Ar,0.0,0.00,1.00); Sm (SG, 2x3.00); Cm (21:186)

TOF MS ES+  
2.95ef

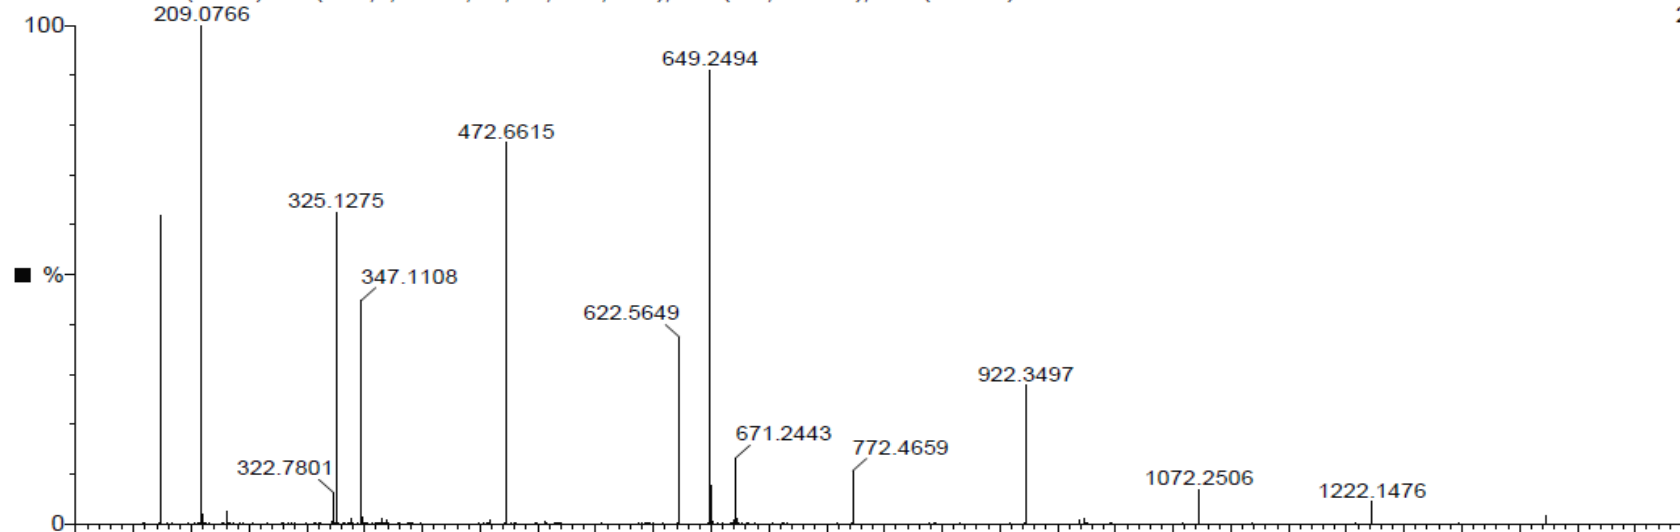

L070209D 178 (3.264) AM (Cen,4, 80.00, Ar,0.0,0.00,1.00); Sm (SG, 2x3.00); Cm (21:186)

TOF MS ES+  
1.84e5

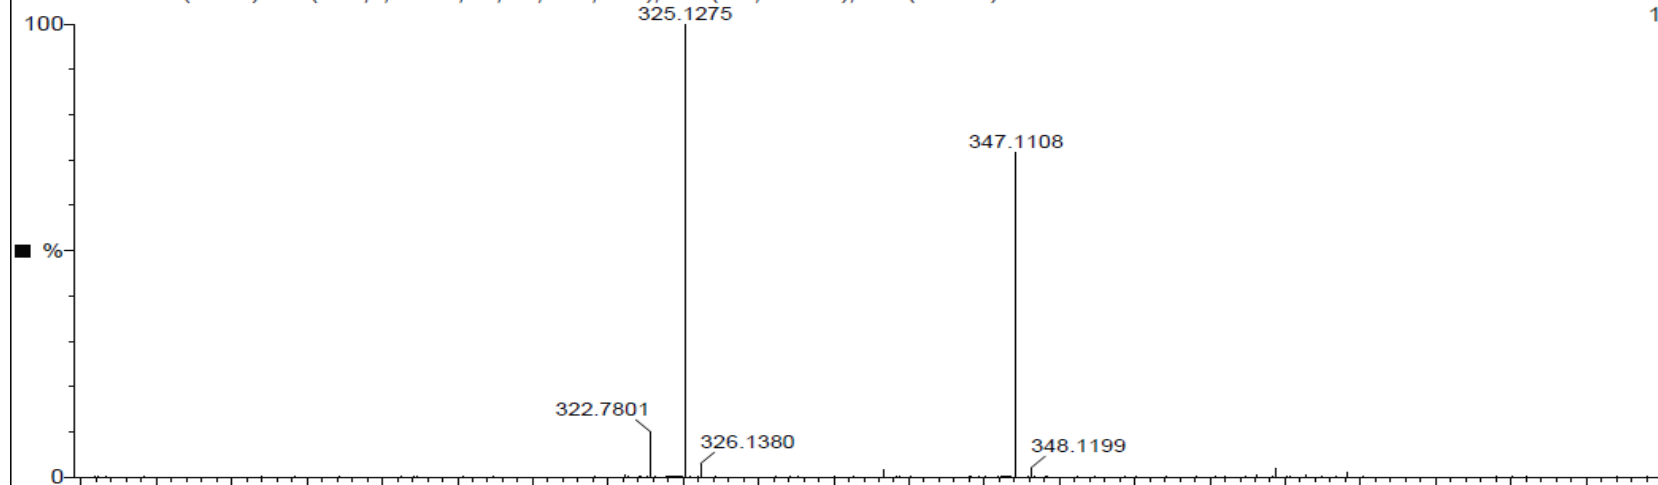

**3-(Tetrazol-5-ylmethyl)thymidine (8).** Analytical traces in Water:Acetonitrile gradient

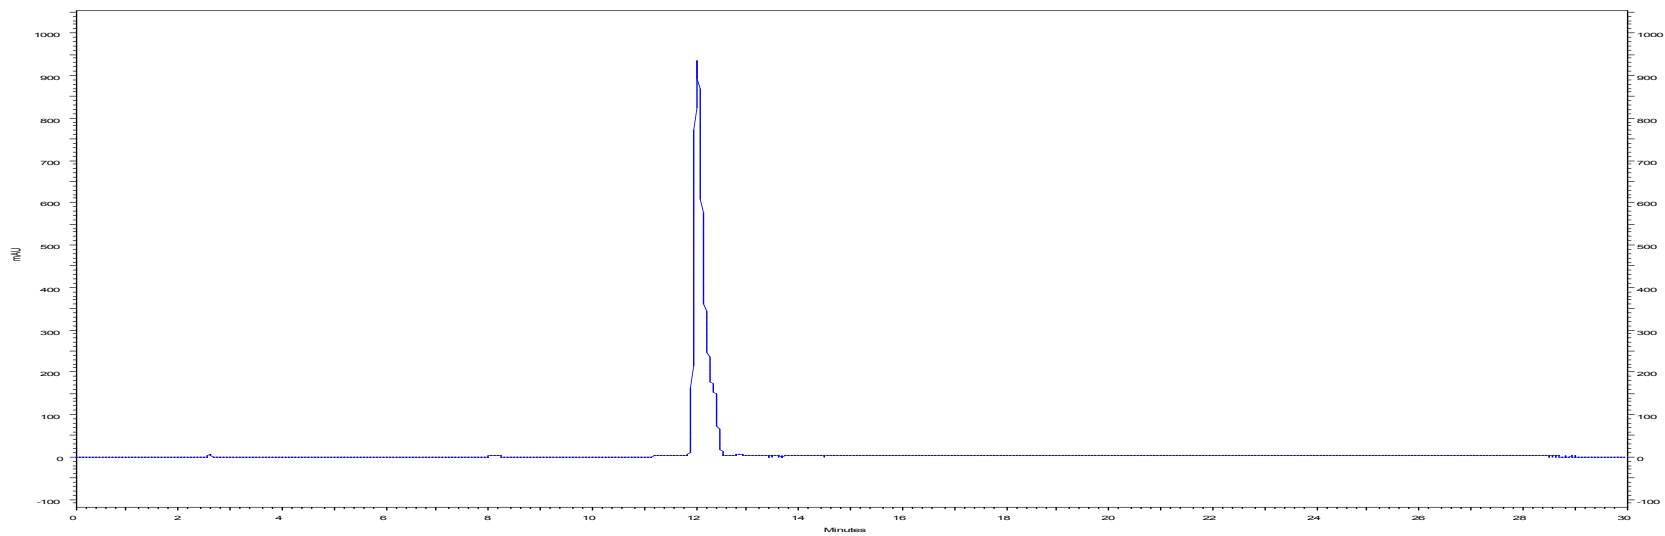

Analytical traces in Water: Methanol gradient

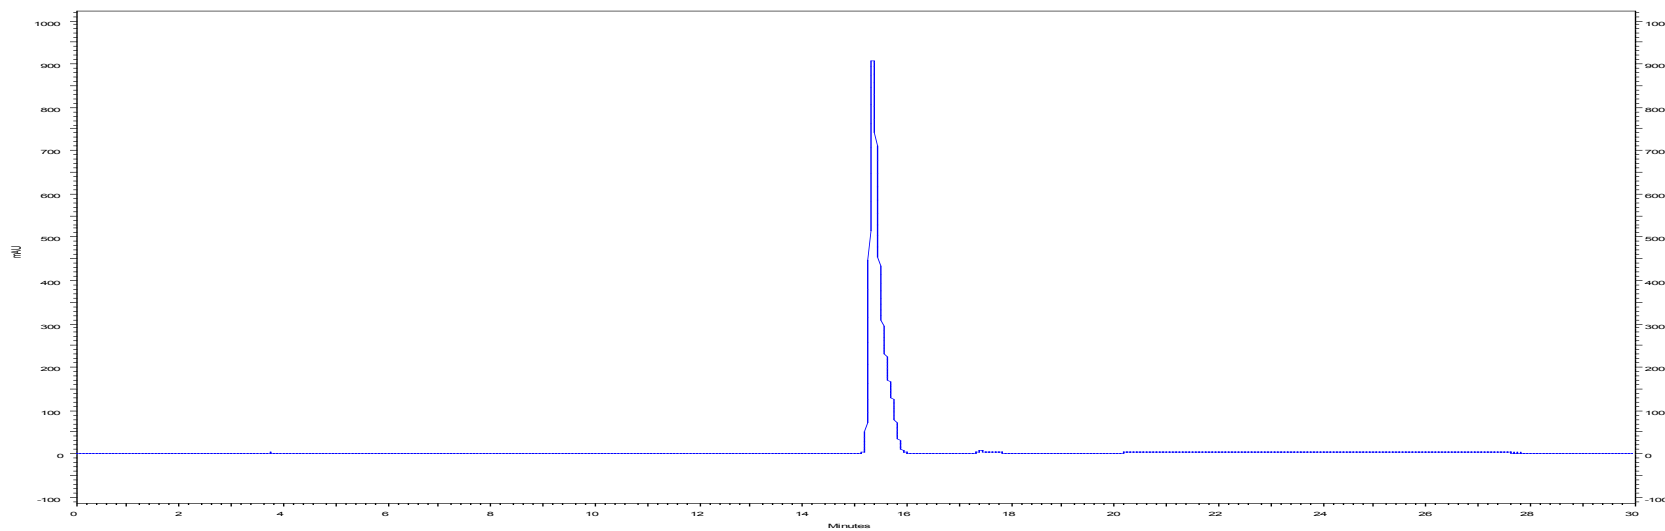

3-[1(2)-Propyltetrazol-5-ylmethyl]thymidine (9a). <sup>1</sup>H NMR

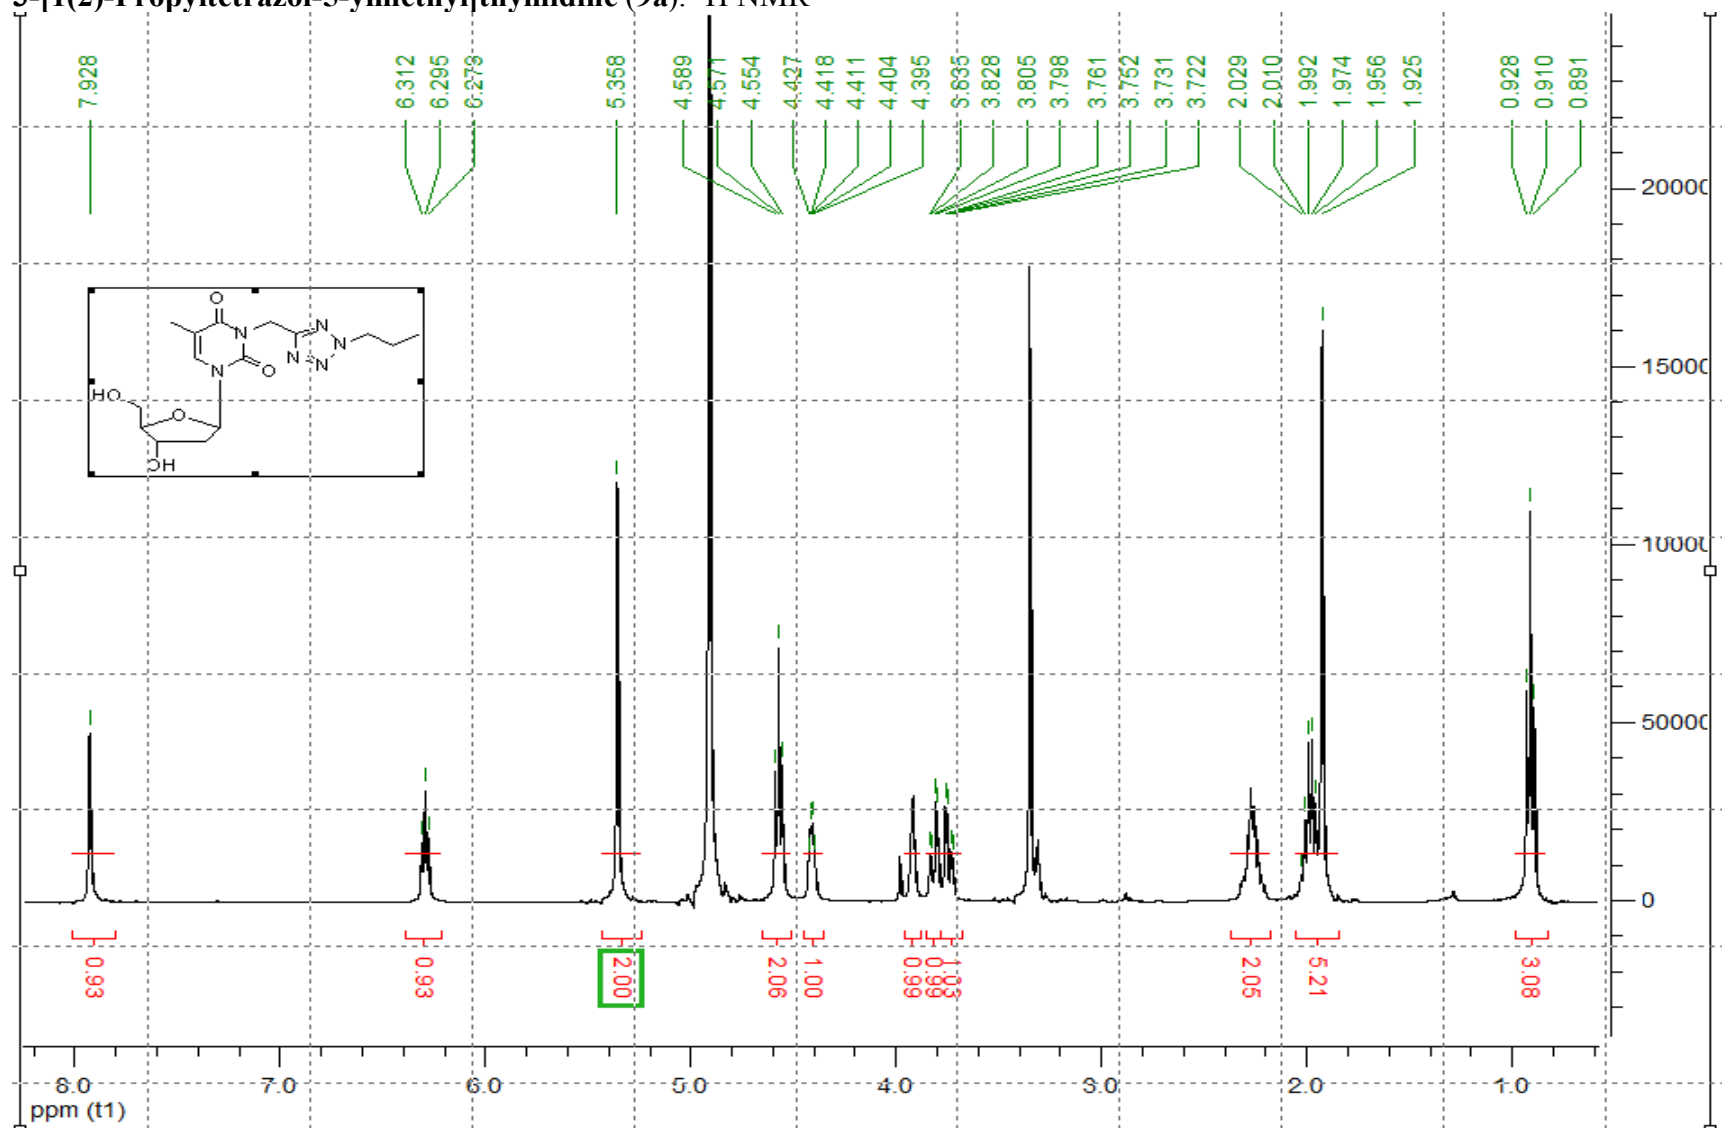

3-[1(2)-Propyltetrazol-5-ylmethyl]thymidine (9a). <sup>13</sup>C NMR

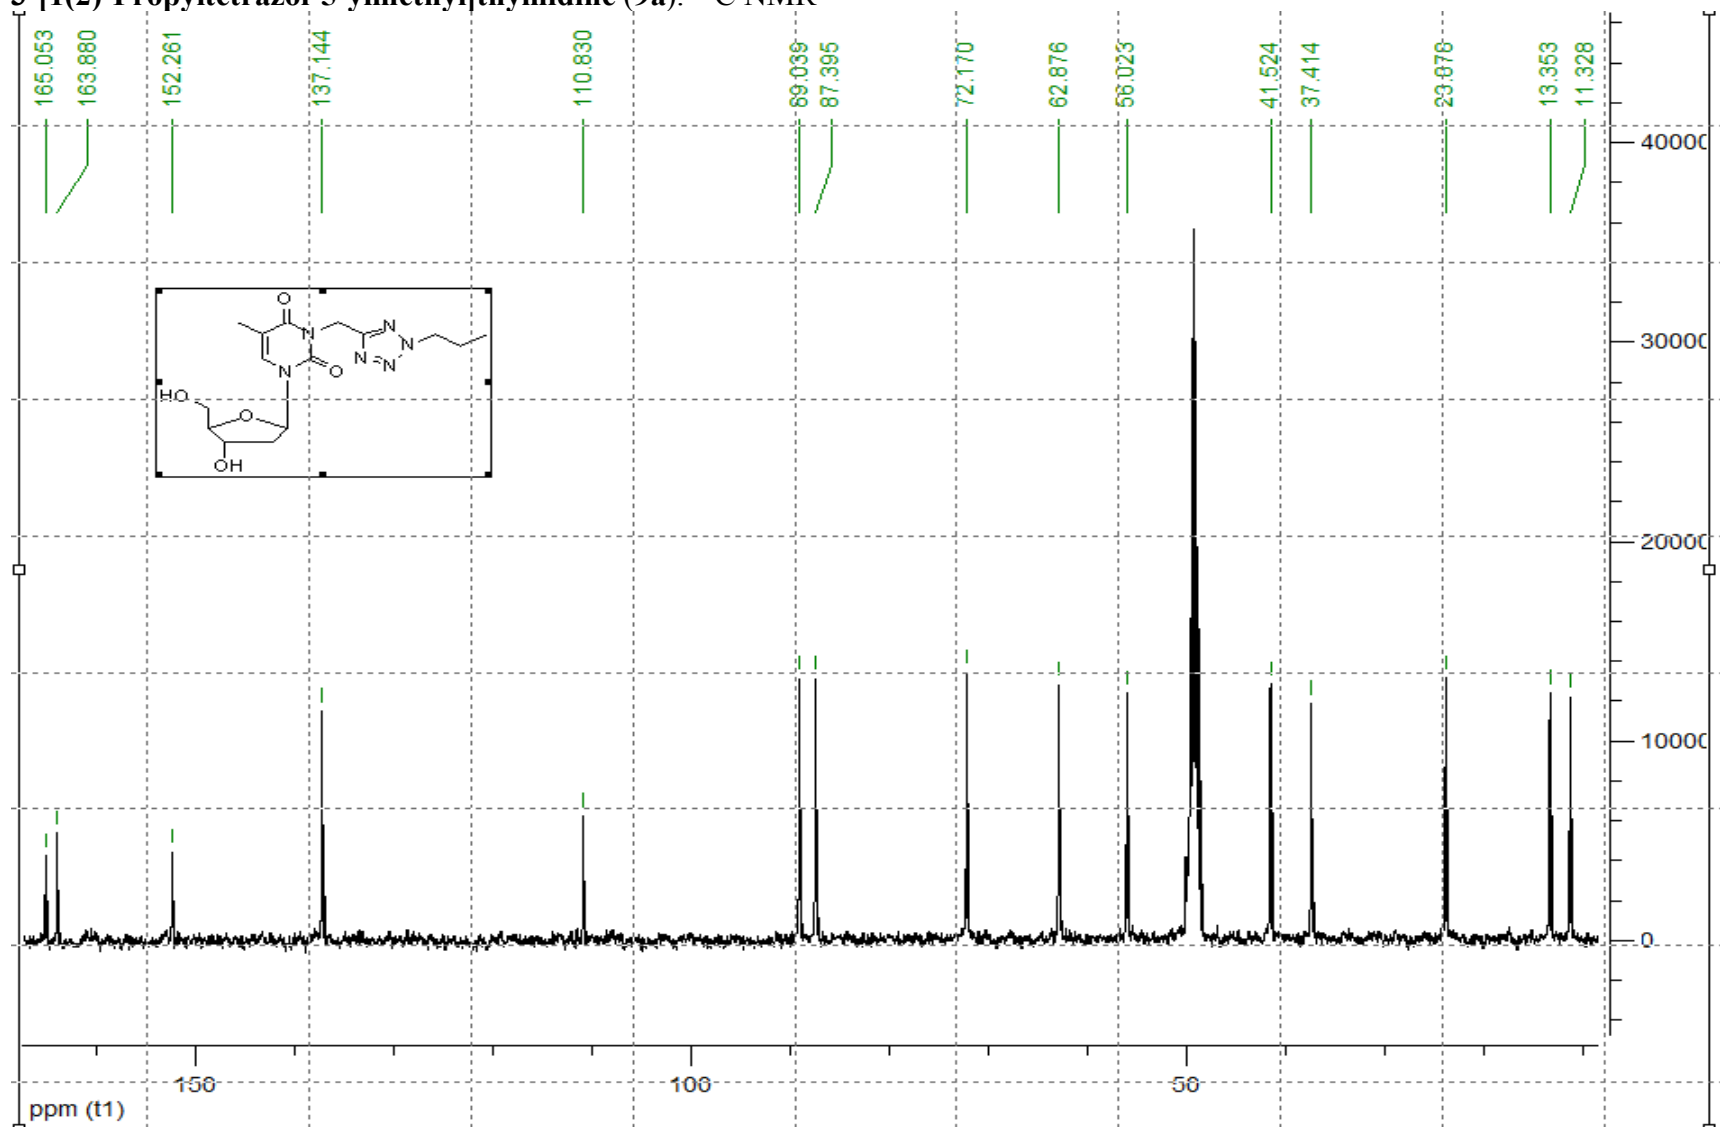

**3-[1(2)-Propyltetrazol-5-ylmethyl]thymidine (9a)**. HR-ESI-MS found: 389.1536, 405.1545 and 755.3516)

L111910C 42 (1.470) Sm (SG, 2x3.00); Cm (35:62)

TOF MS ES+  
3.63e4

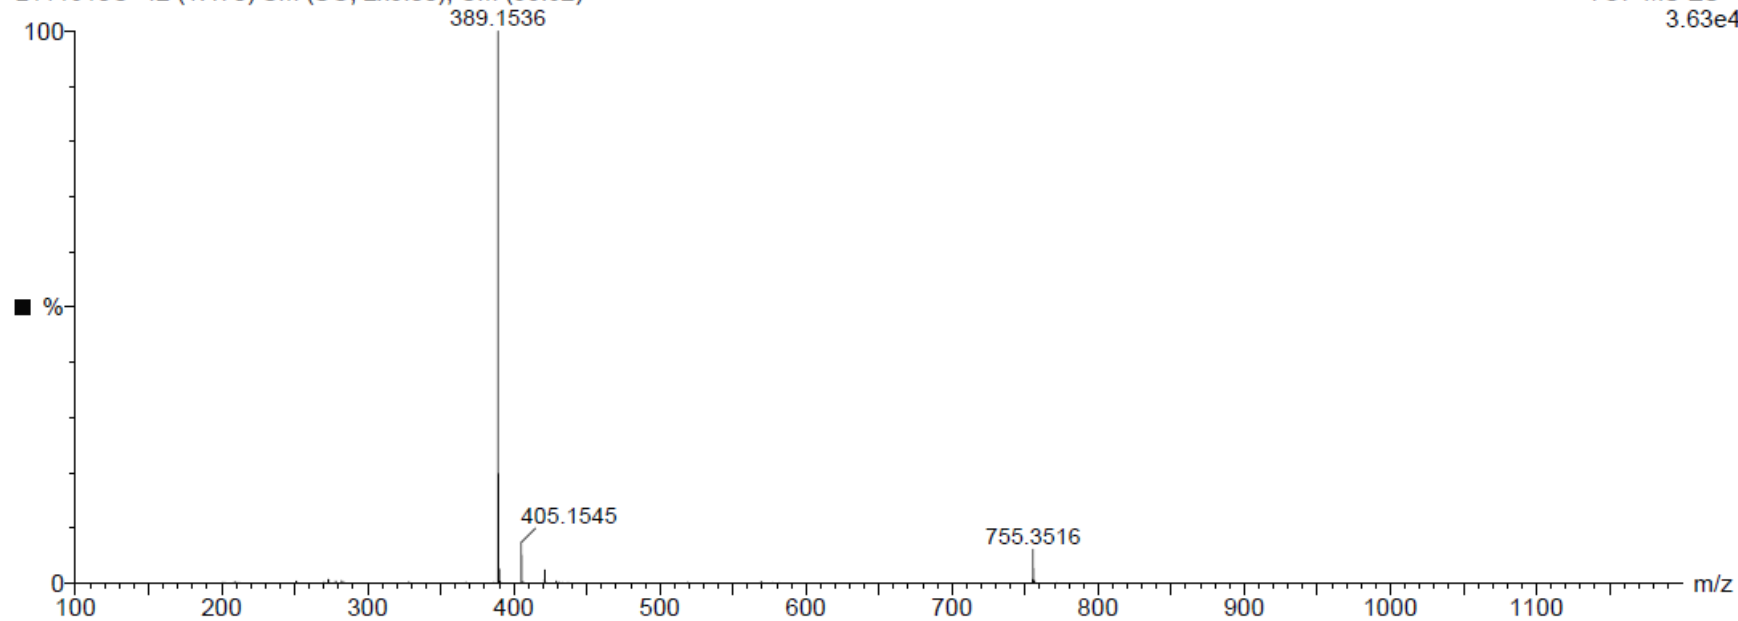



**3-[1(2)-Propyltetrazol-5-ylmethyl]thymidine (9a).** Analytical traces in Water:Acetonitrile gradient

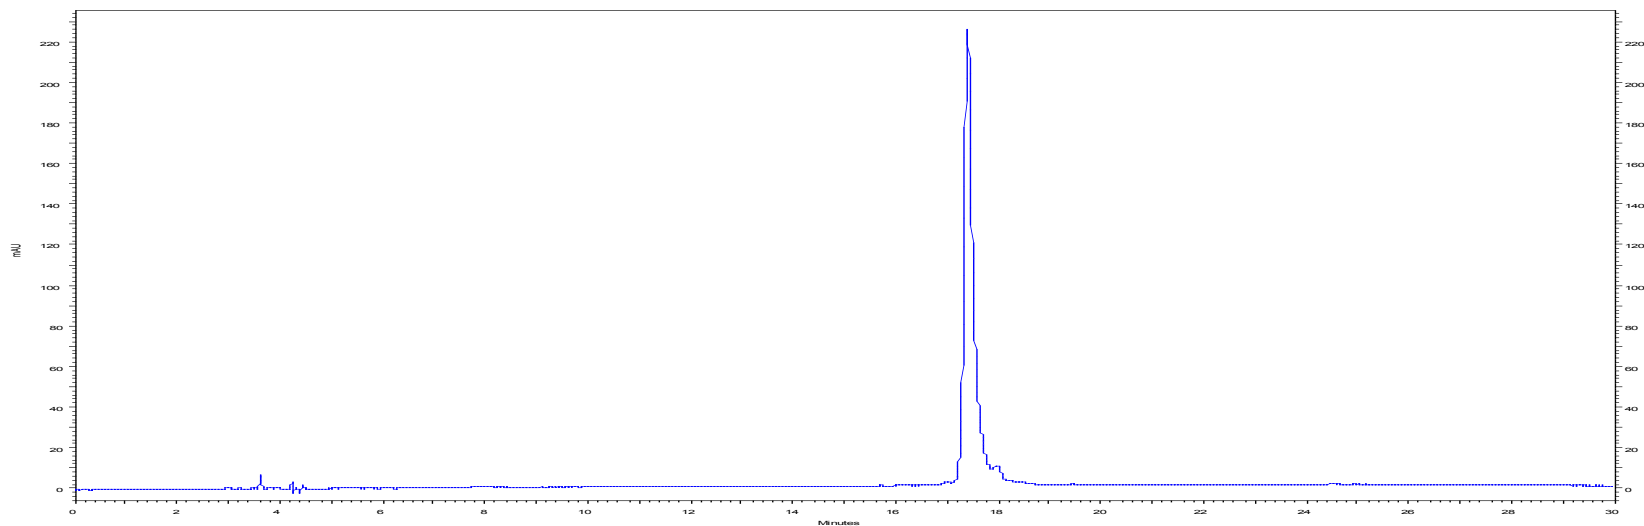

Analytical traces in Water: Methanol gradient

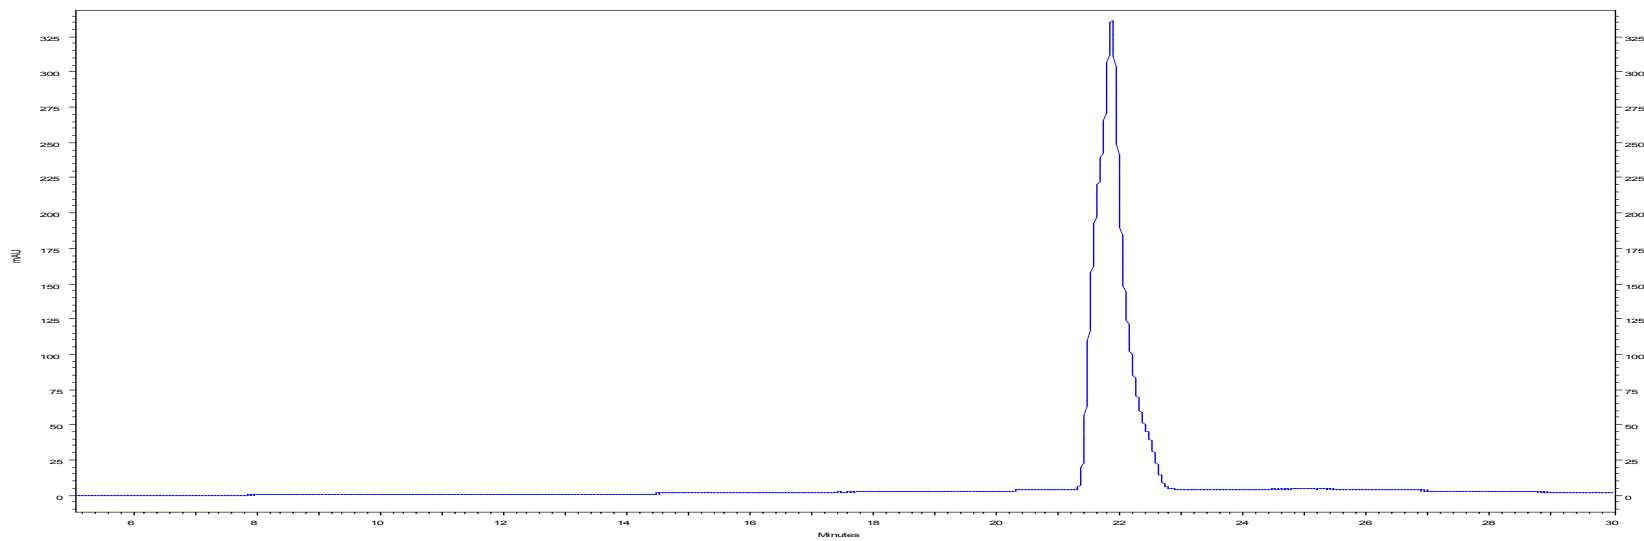

3-[1(2)-*closo*-1,7-Carboranylethyltetrazol-5-ylmethyl]thymidine (9b1/2). <sup>1</sup>H NMR

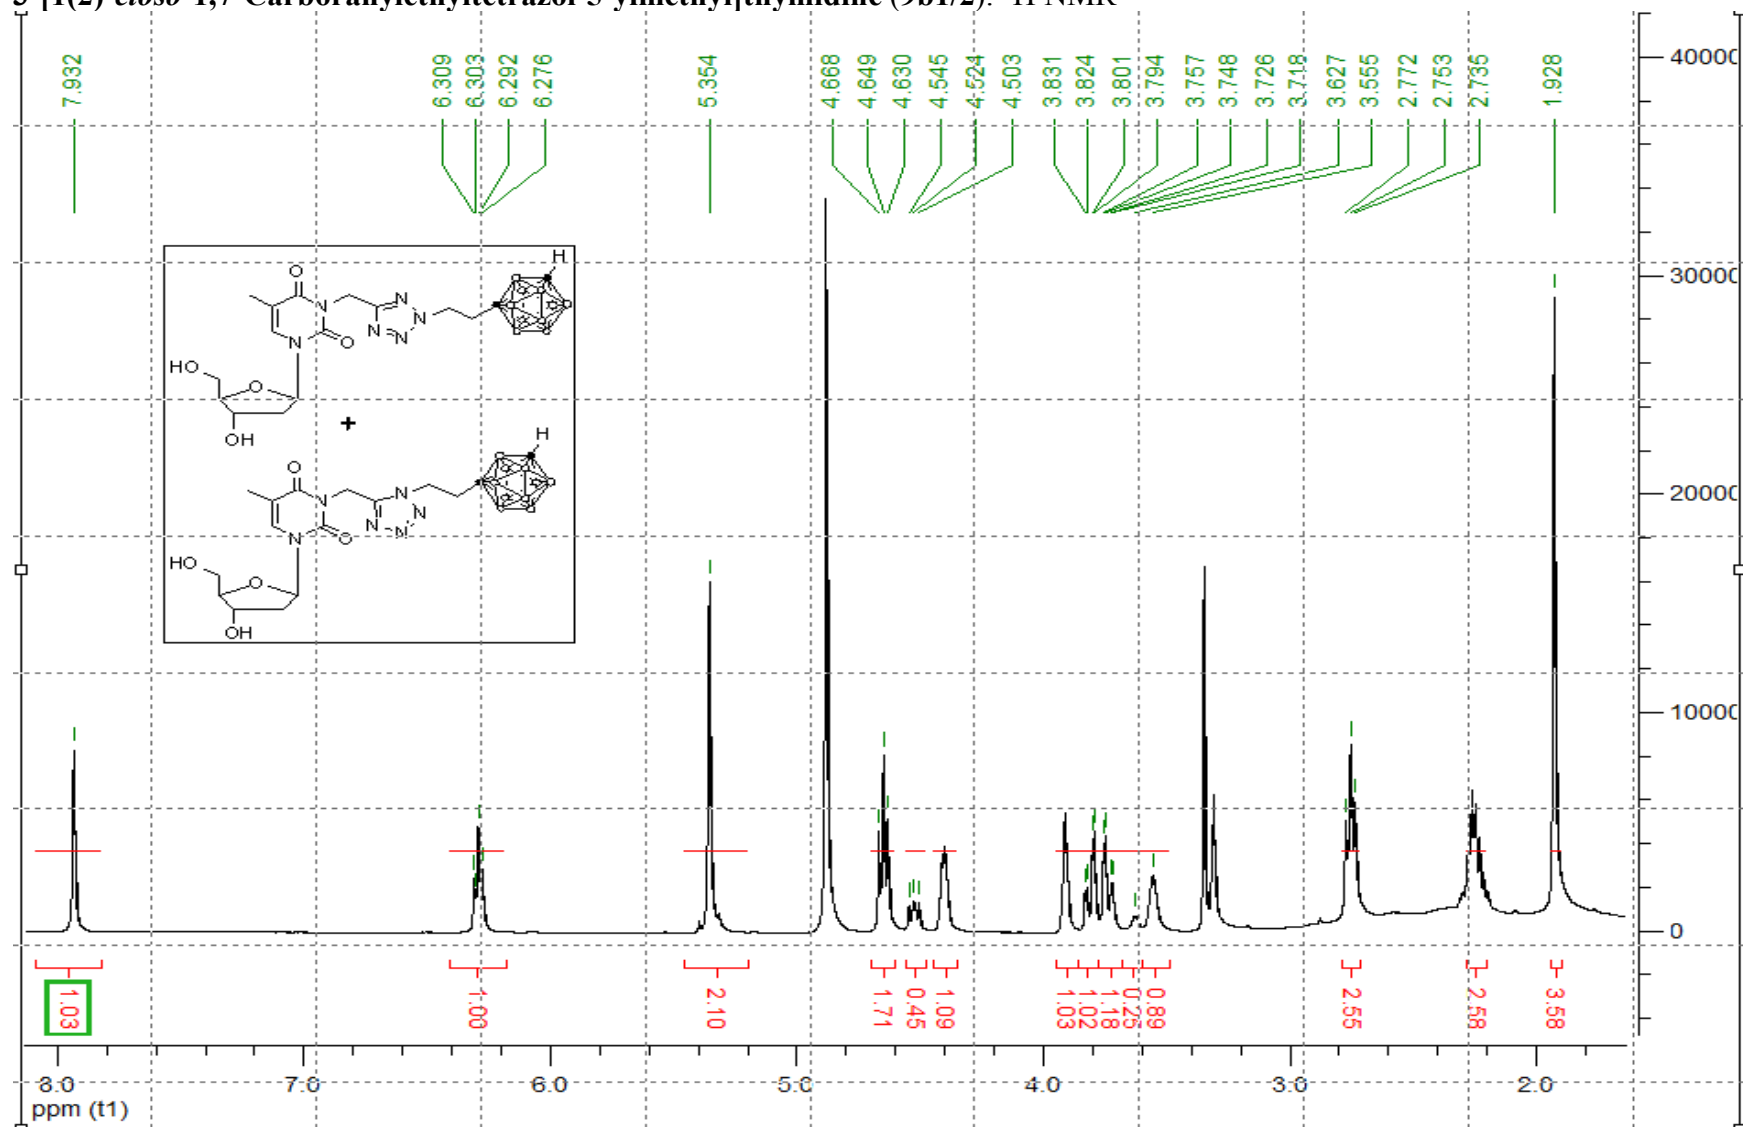

3-[1(2)-*closo*-1,7-Carboranylethyltetrazol-5-ylmethyl]thymidine (9b1/2).  $^{13}\text{C}$  NMR

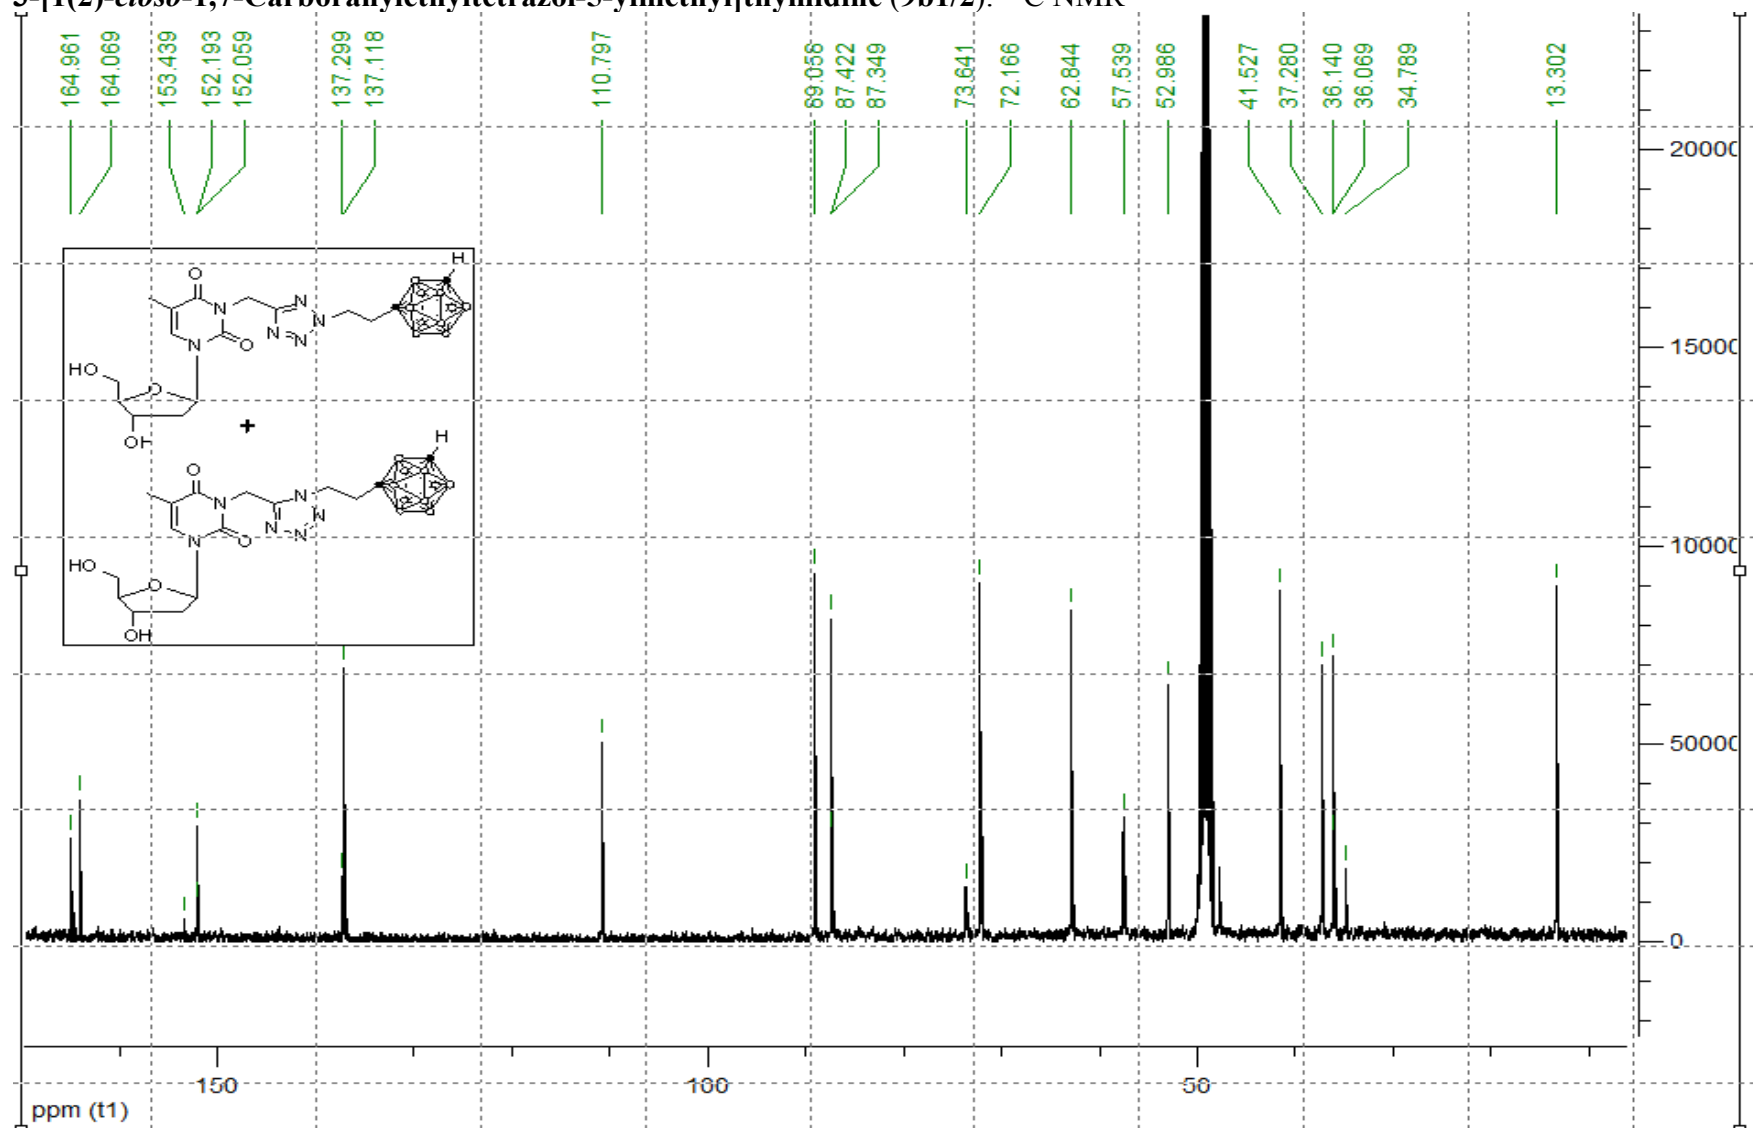

3-[1(2)-*closo*-1,7-Carboranylethyltetrazol-5-ylmethyl]thymidine (9b1/2). HR-ESI-MS found: 495.3372.

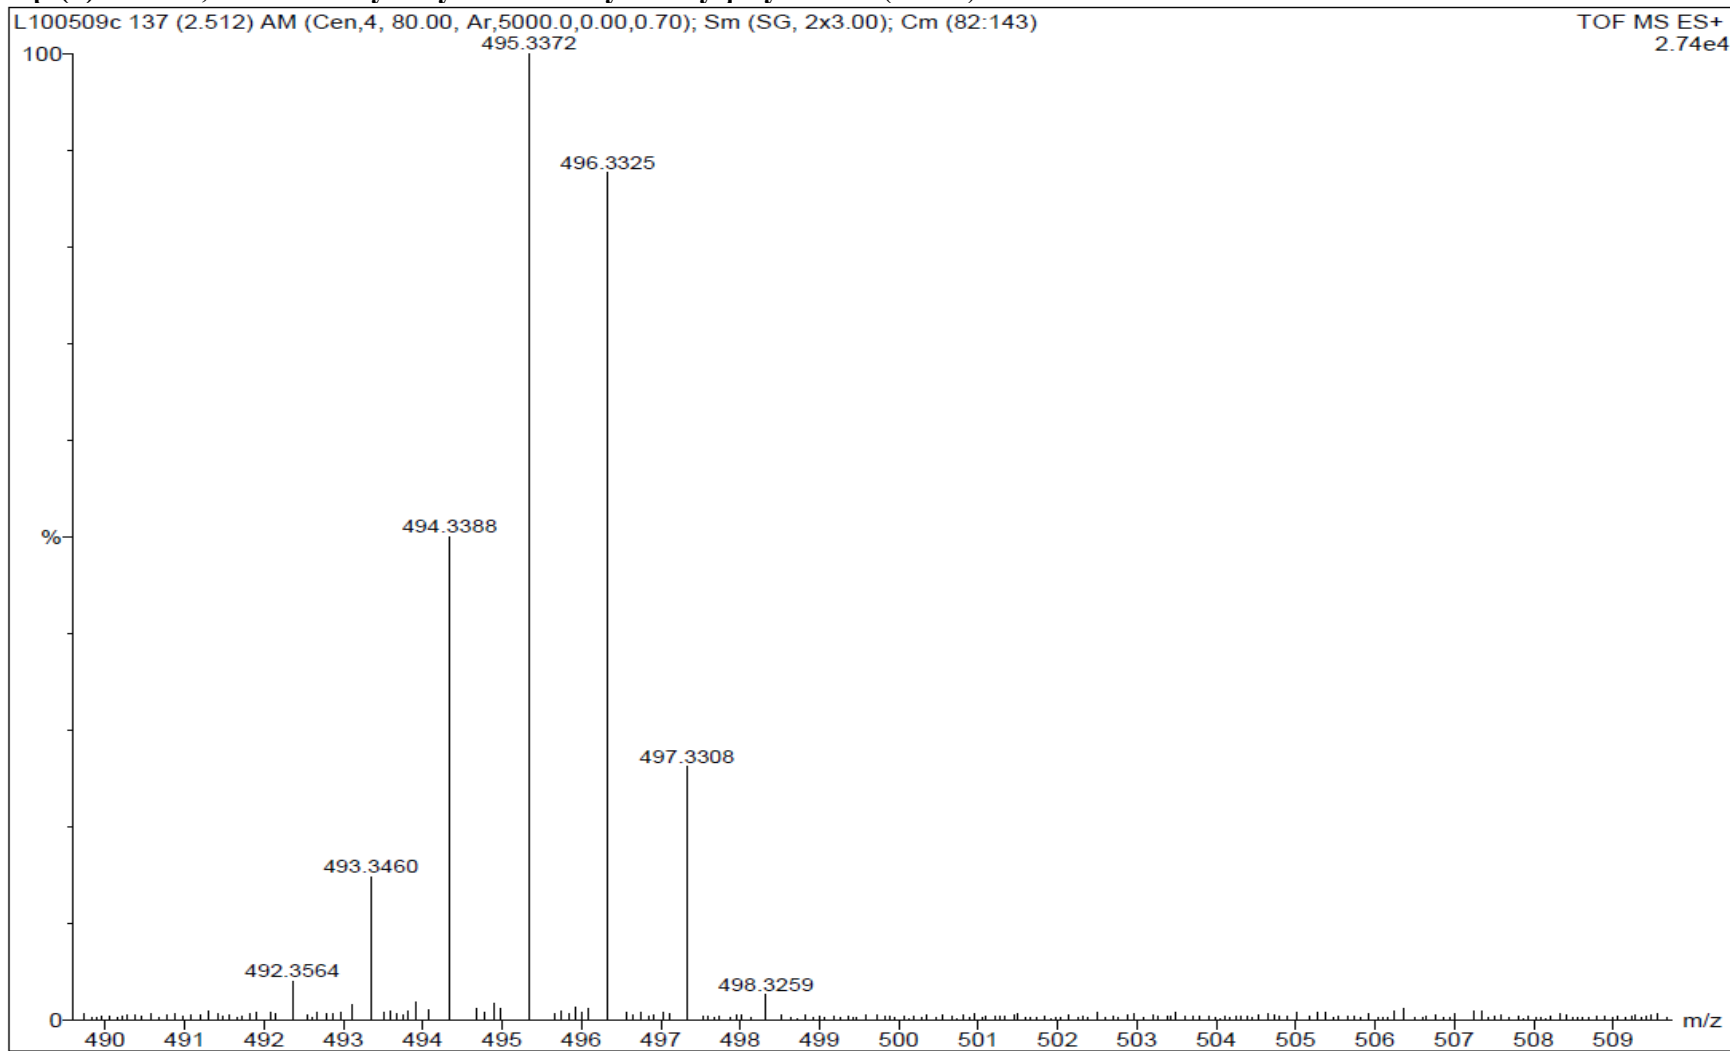

3-[1(2)-*closo*-1,7-Carboranylethyltetrazol-5-ylmethyl]thymidine (9b1/2). Analytical traces in Water:Acetonitrile gradient

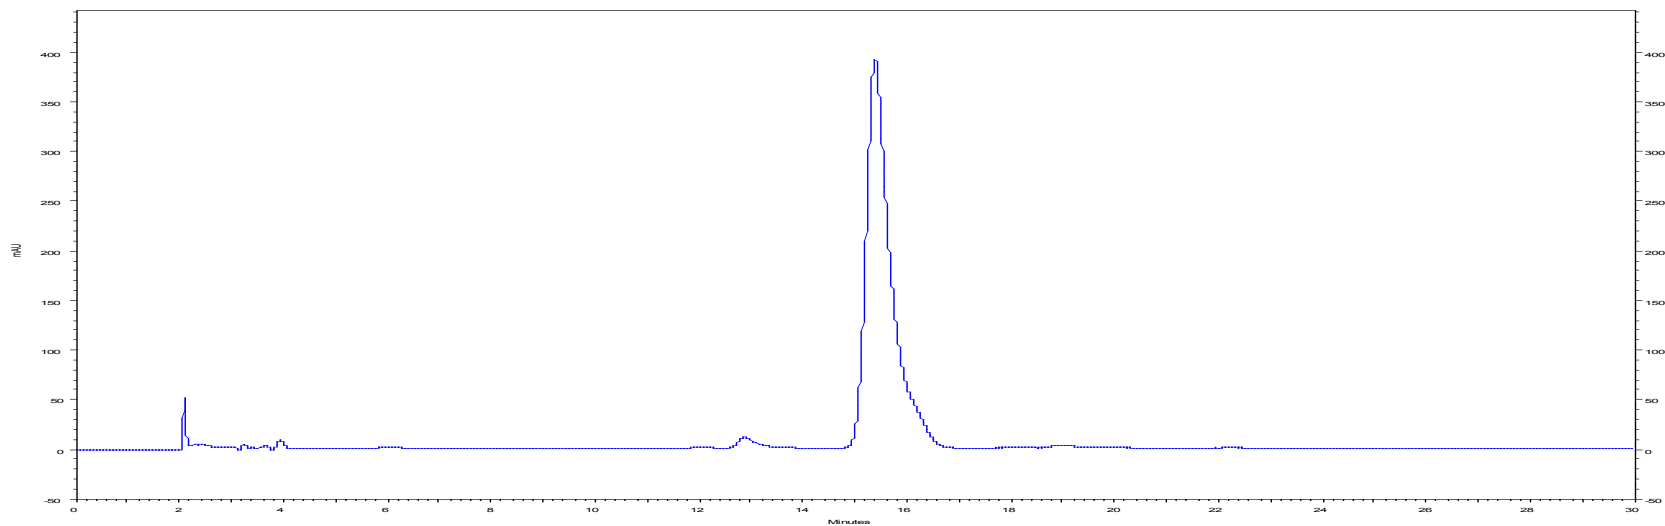

Analytical traces in Water:Methanol gradient

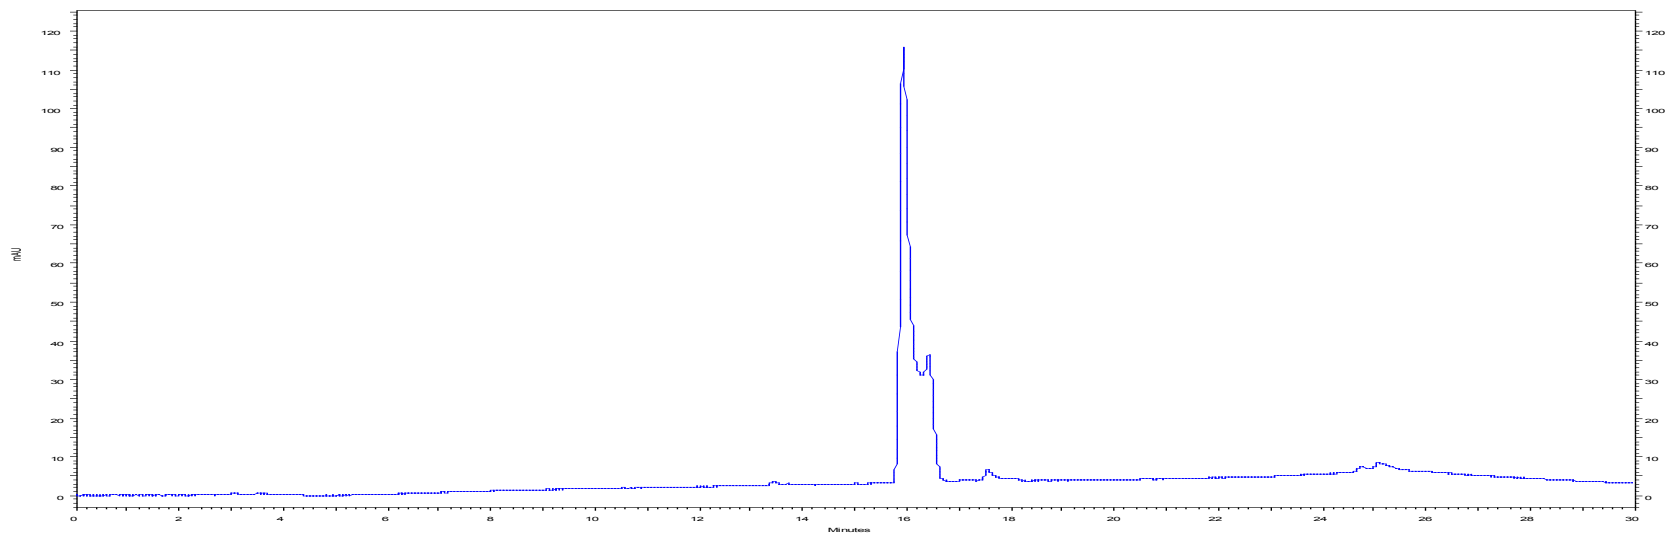

3-[1(2)-*closo*-1,7-Carboranylethyltetrazol-5-ylmethyl]thymidine (9b1/2).  $^1\text{H}$ - $^1\text{H}$  NOSEY NMR

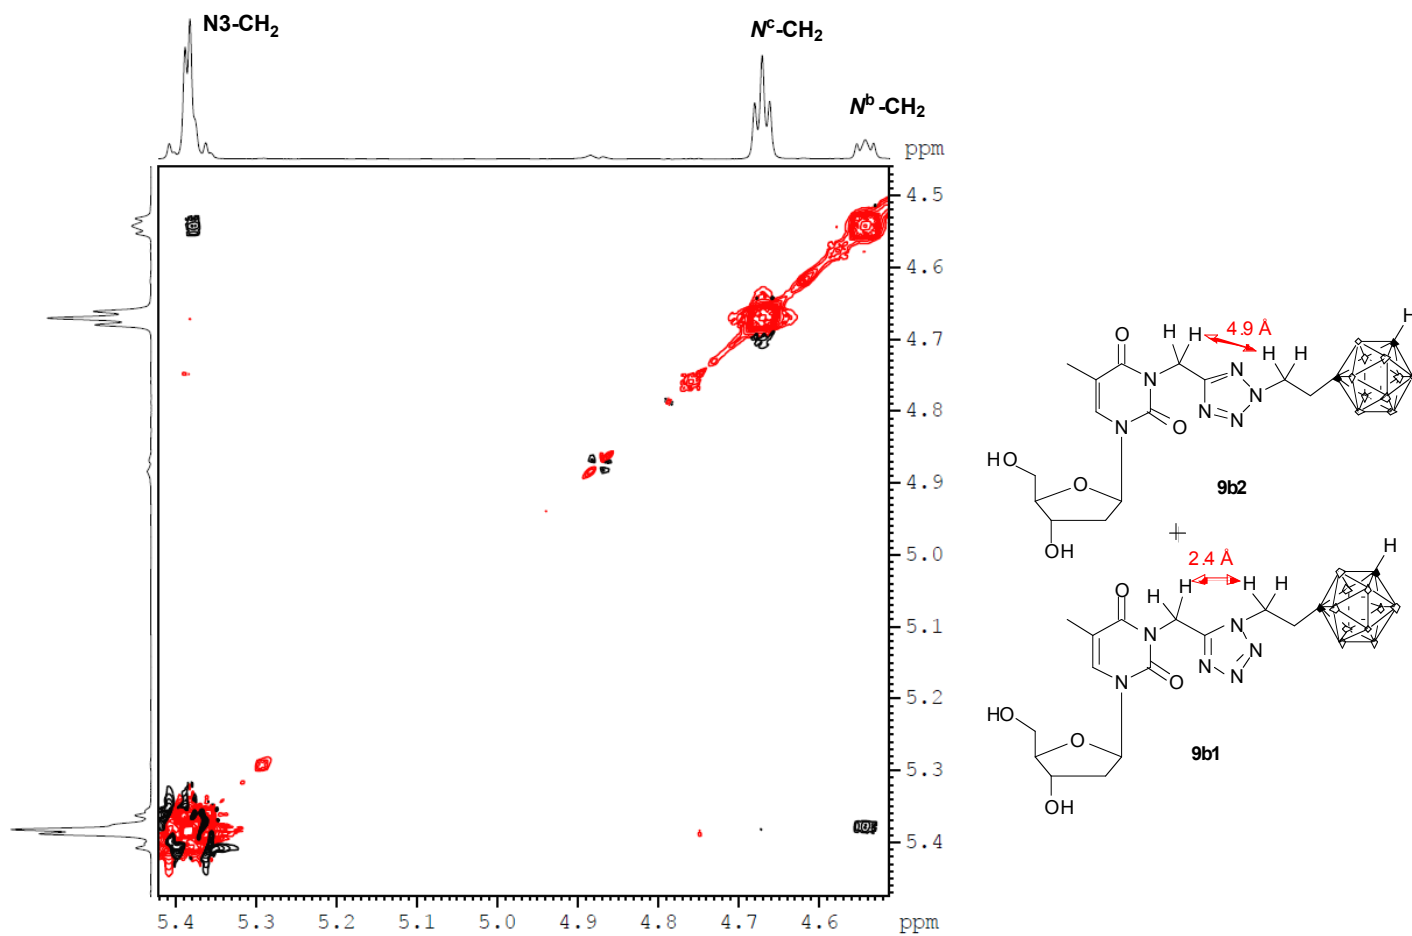

3-[1(2)-*closo*-1,7-Carboranylpropyltetrazol-5-ylmethyl]thymidine (9c1/2). <sup>1</sup>H NMR

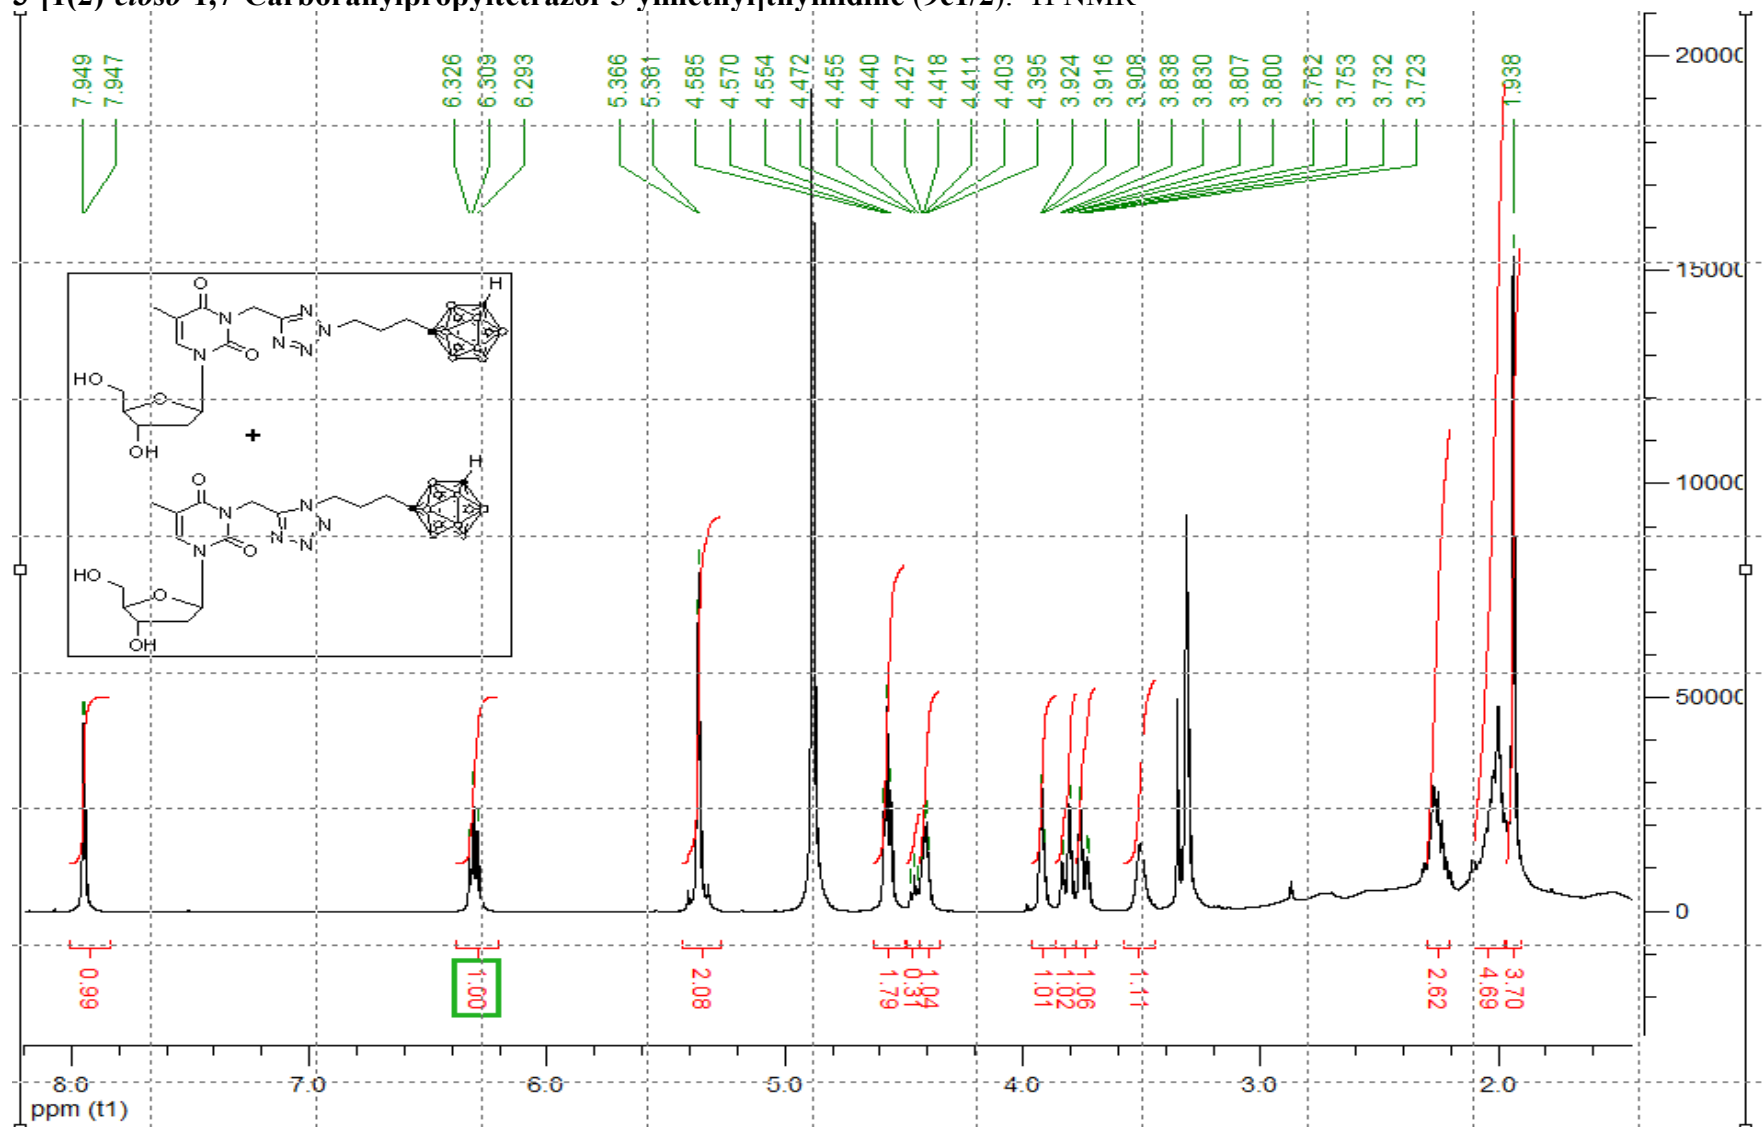

3-[1(2)-*closo*-1,7-Carboranylpropyltetrazol-5-ylmethyl]thymidine (9c1/2).  $^{13}\text{C}$  NMR

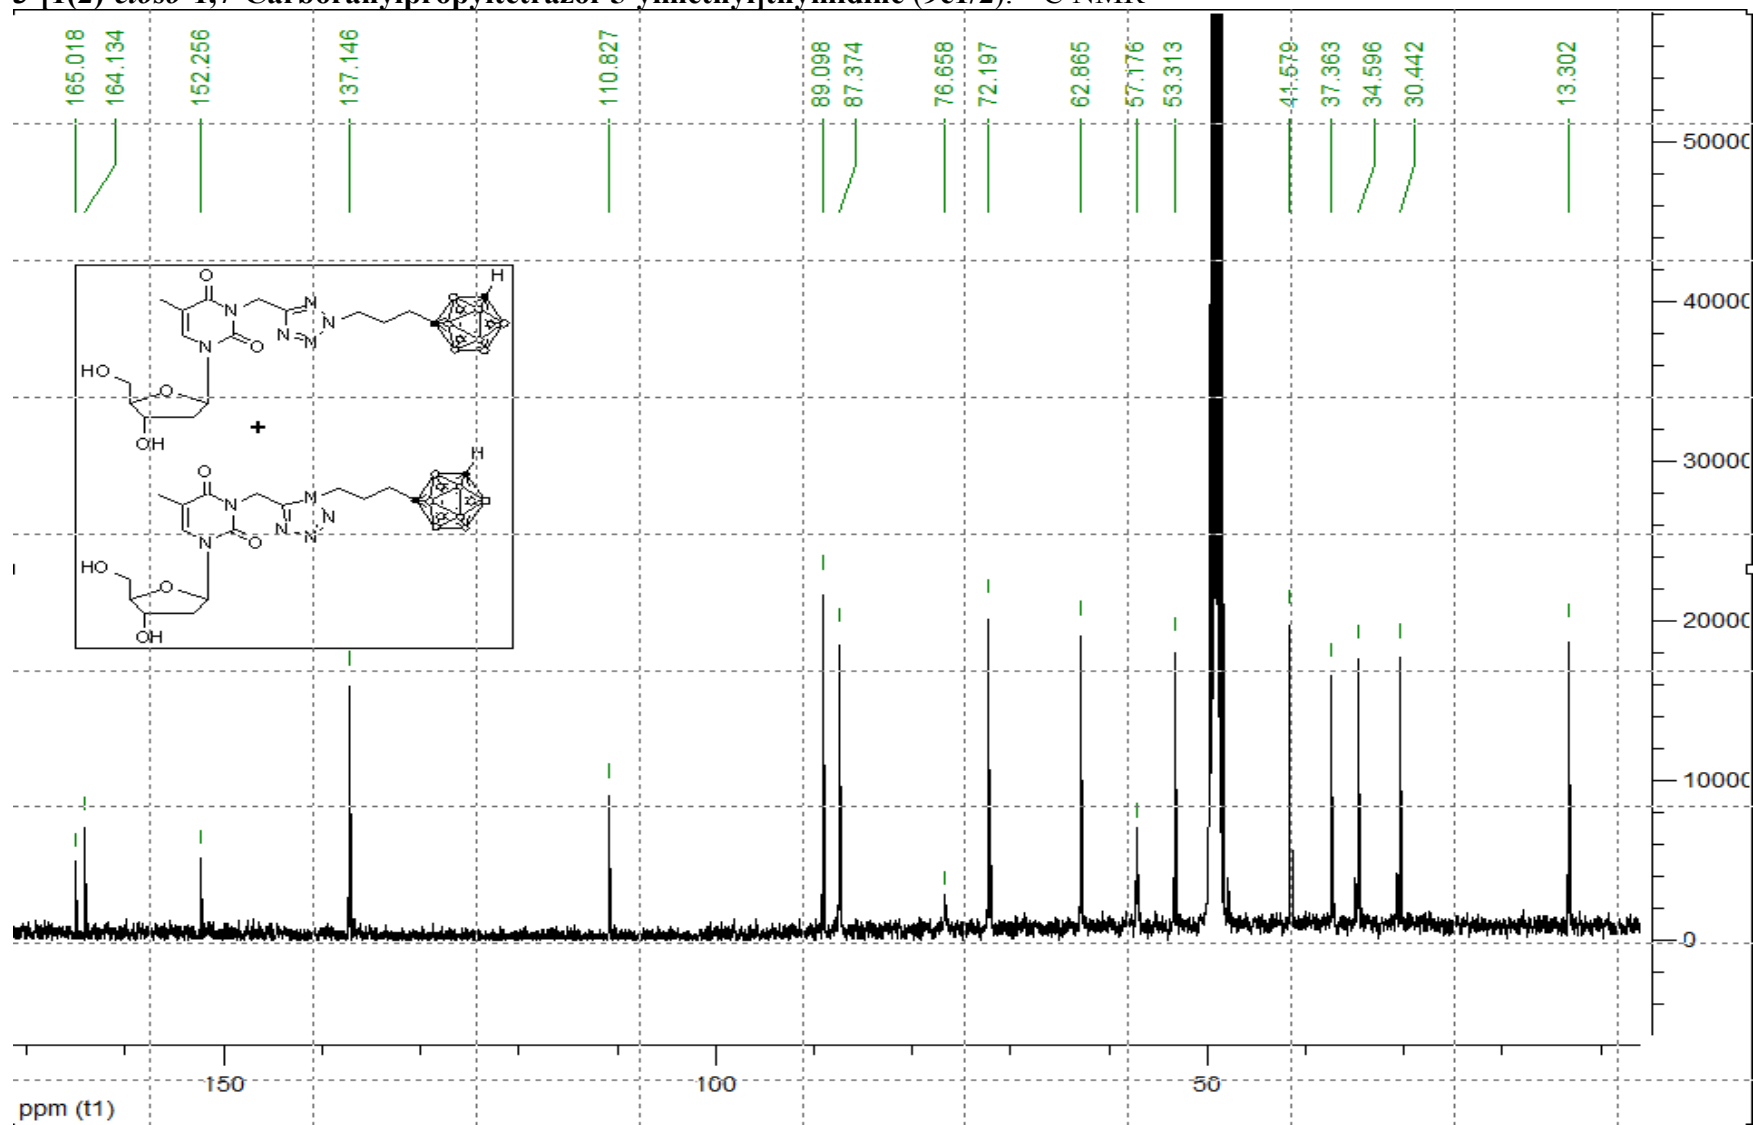



**3-[1(2)-*closo*-1,7-Carboranylpropyltetrazol-5-ylmethyl]thymidine (9c1/2).** HR-ESI-MS found: 531.3341.

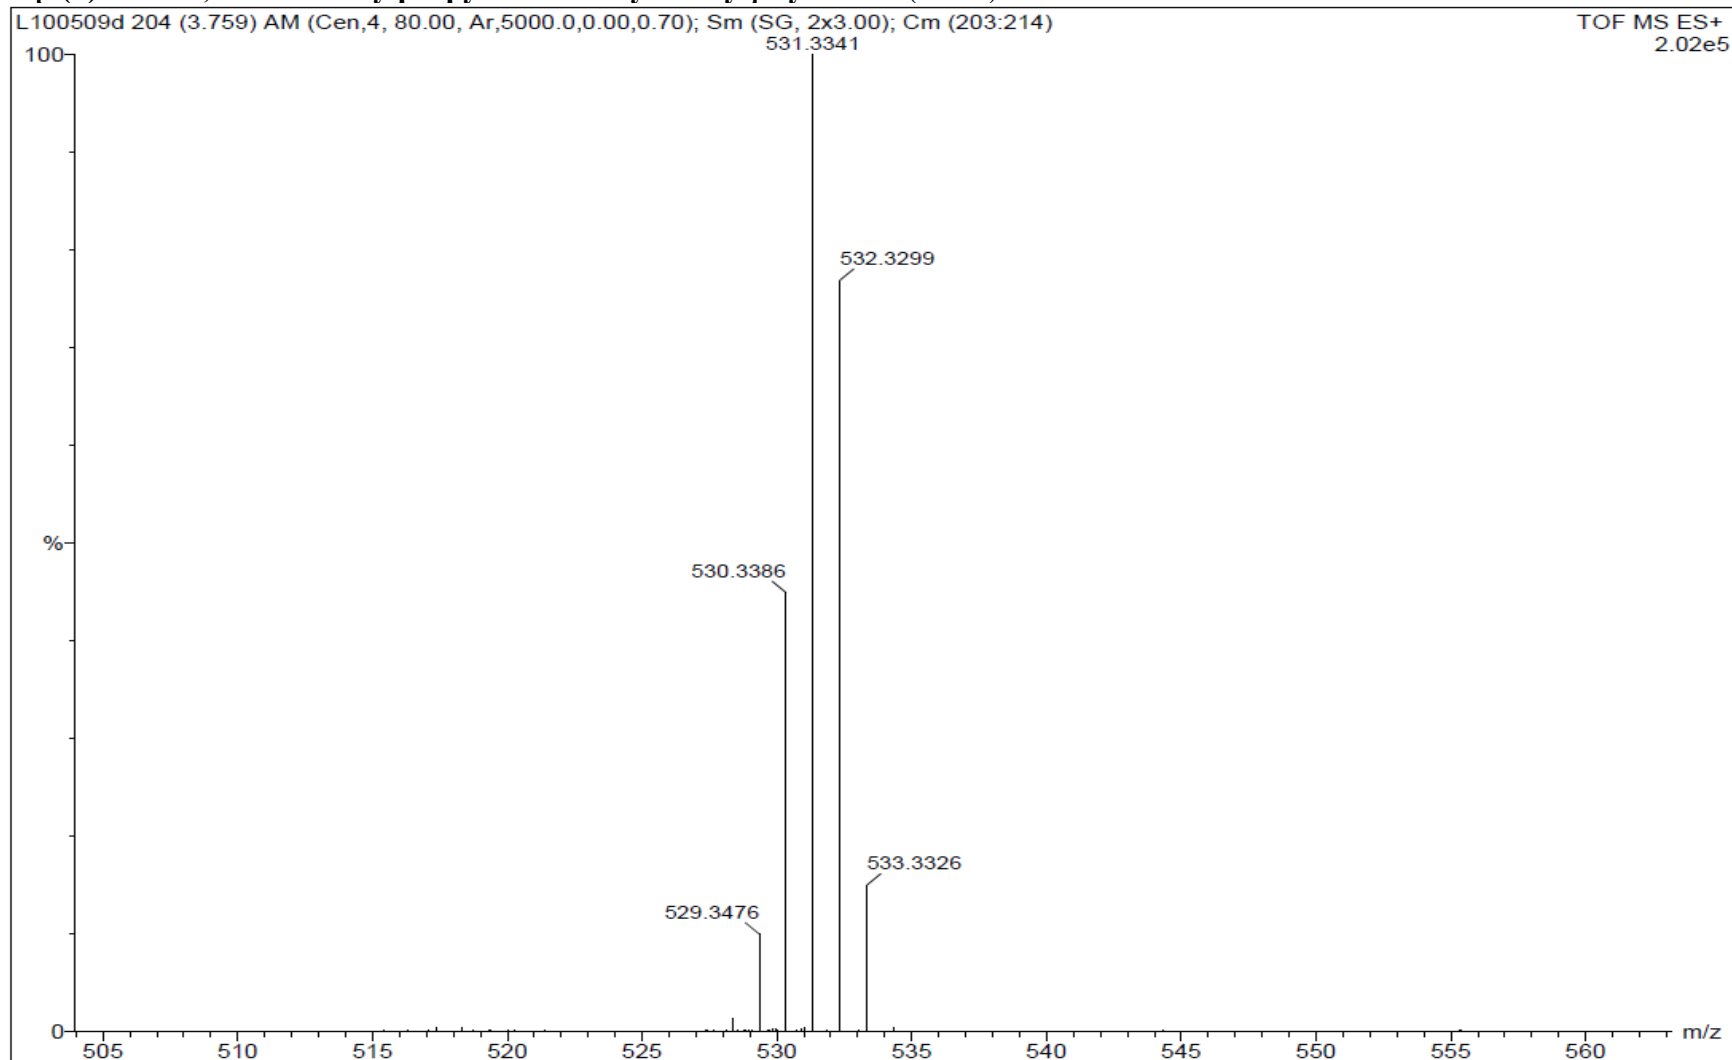

3-[1(2)-*ciso*-1,7-Carboranylpropyltetrazol-5-ylmethyl]thymidine (9c1/2). Analytical traces in Water:Acetonitrile gradient

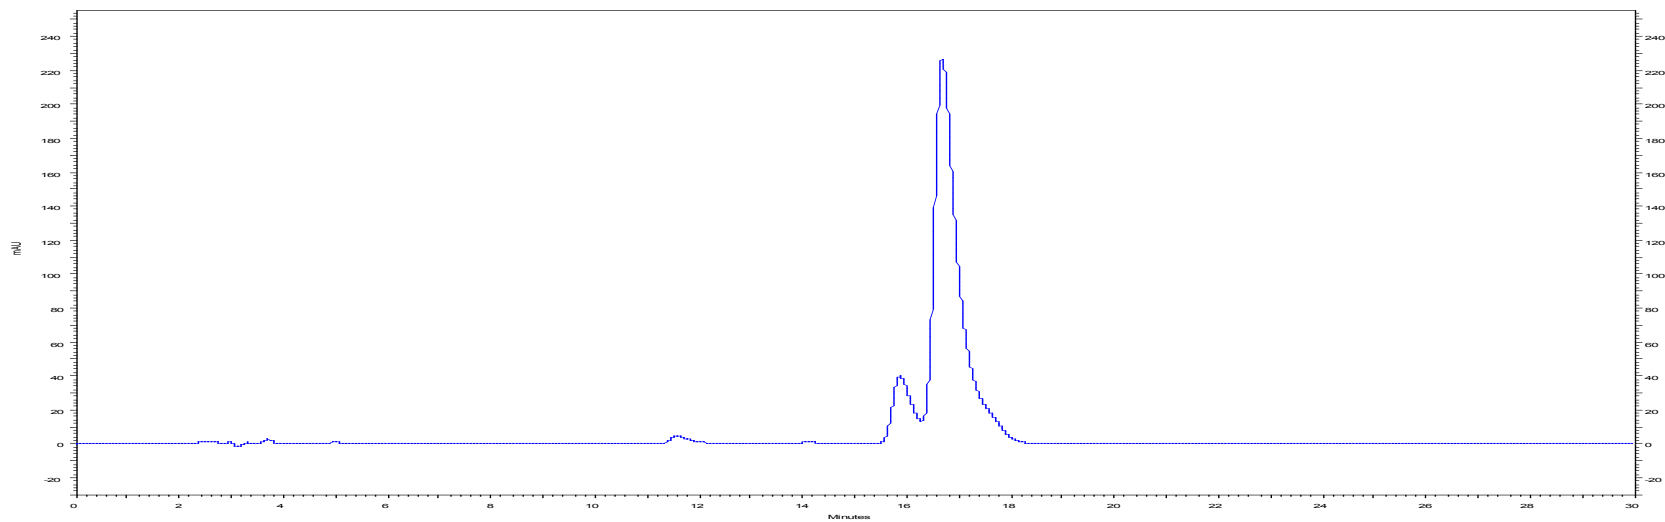

Analytical traces in Water:Methanol gradient

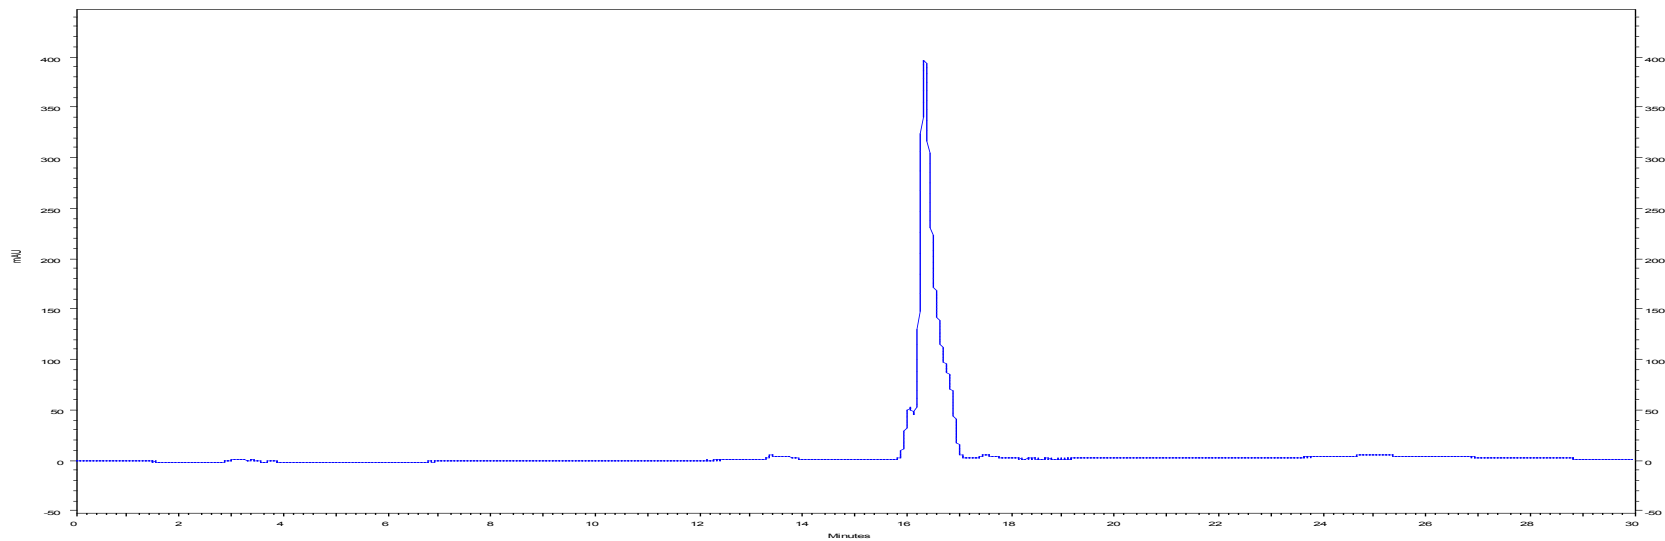

3-[1(2)-*closo*-1,7-Carboranylbutyltetrazol-5-ylmethyl]thymidine (9d1/2). <sup>1</sup>H NMR

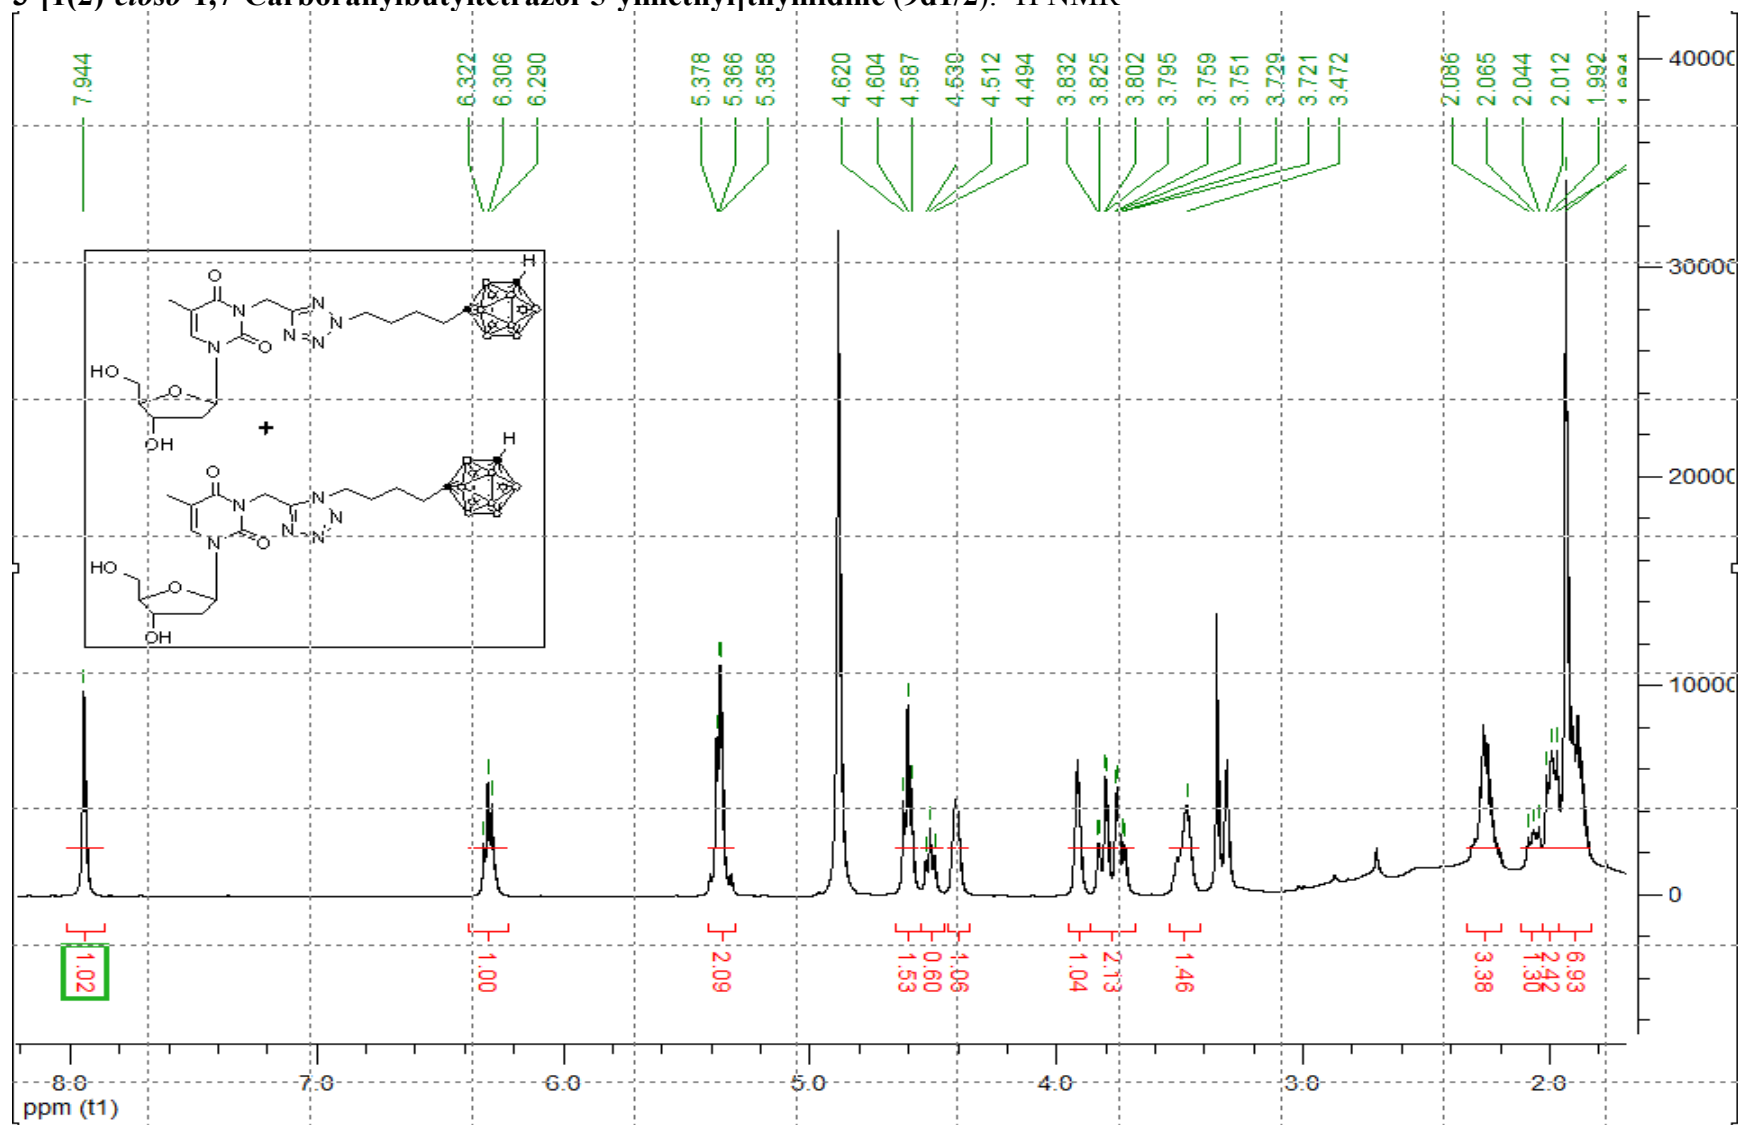

3-[1(2)-*closo*-1,7-Carboranylbutyltetrazol-5-ylmethyl]thymidine (9d1/2). <sup>13</sup>C NMR

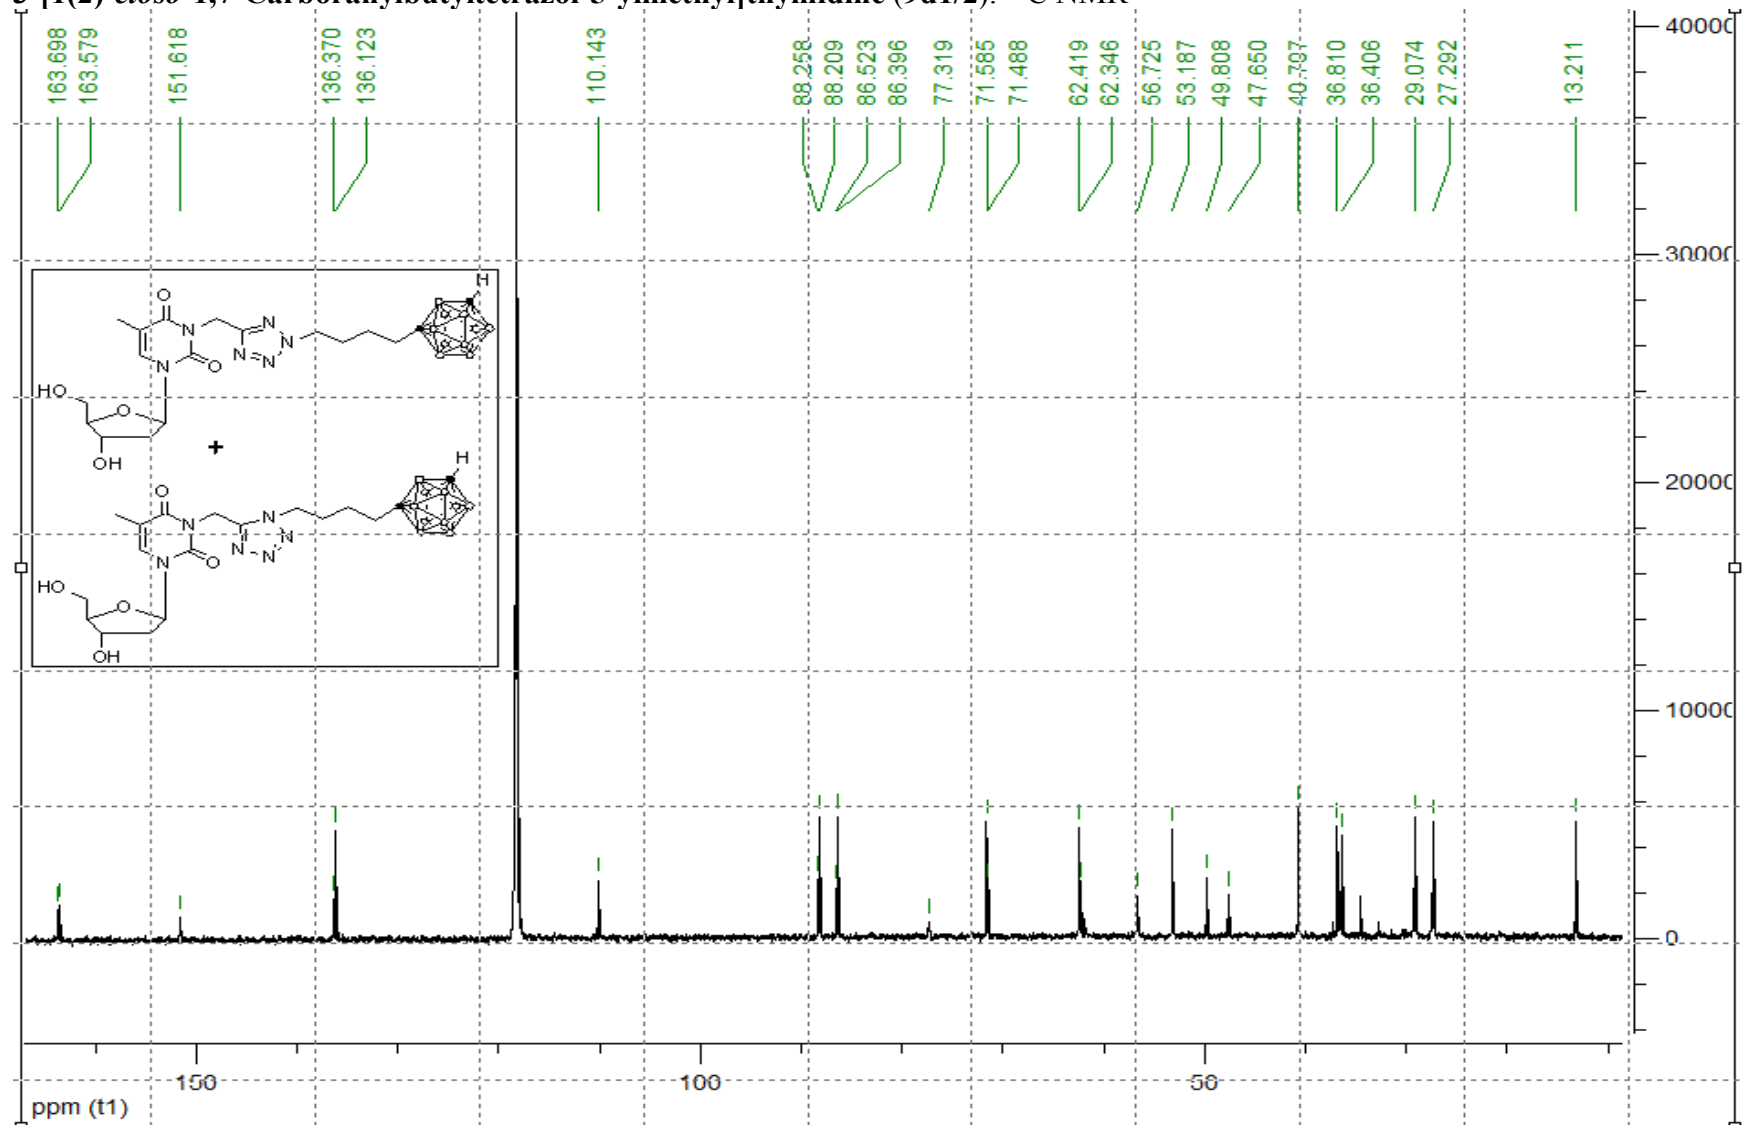

**3-[1(2)-*closo*-1,7-Carboranylbutyltetrazol-5-ylmethyl]thymidine (9d1/2)**. HR-ESI-MS found: 523.3672 and 545.3411.

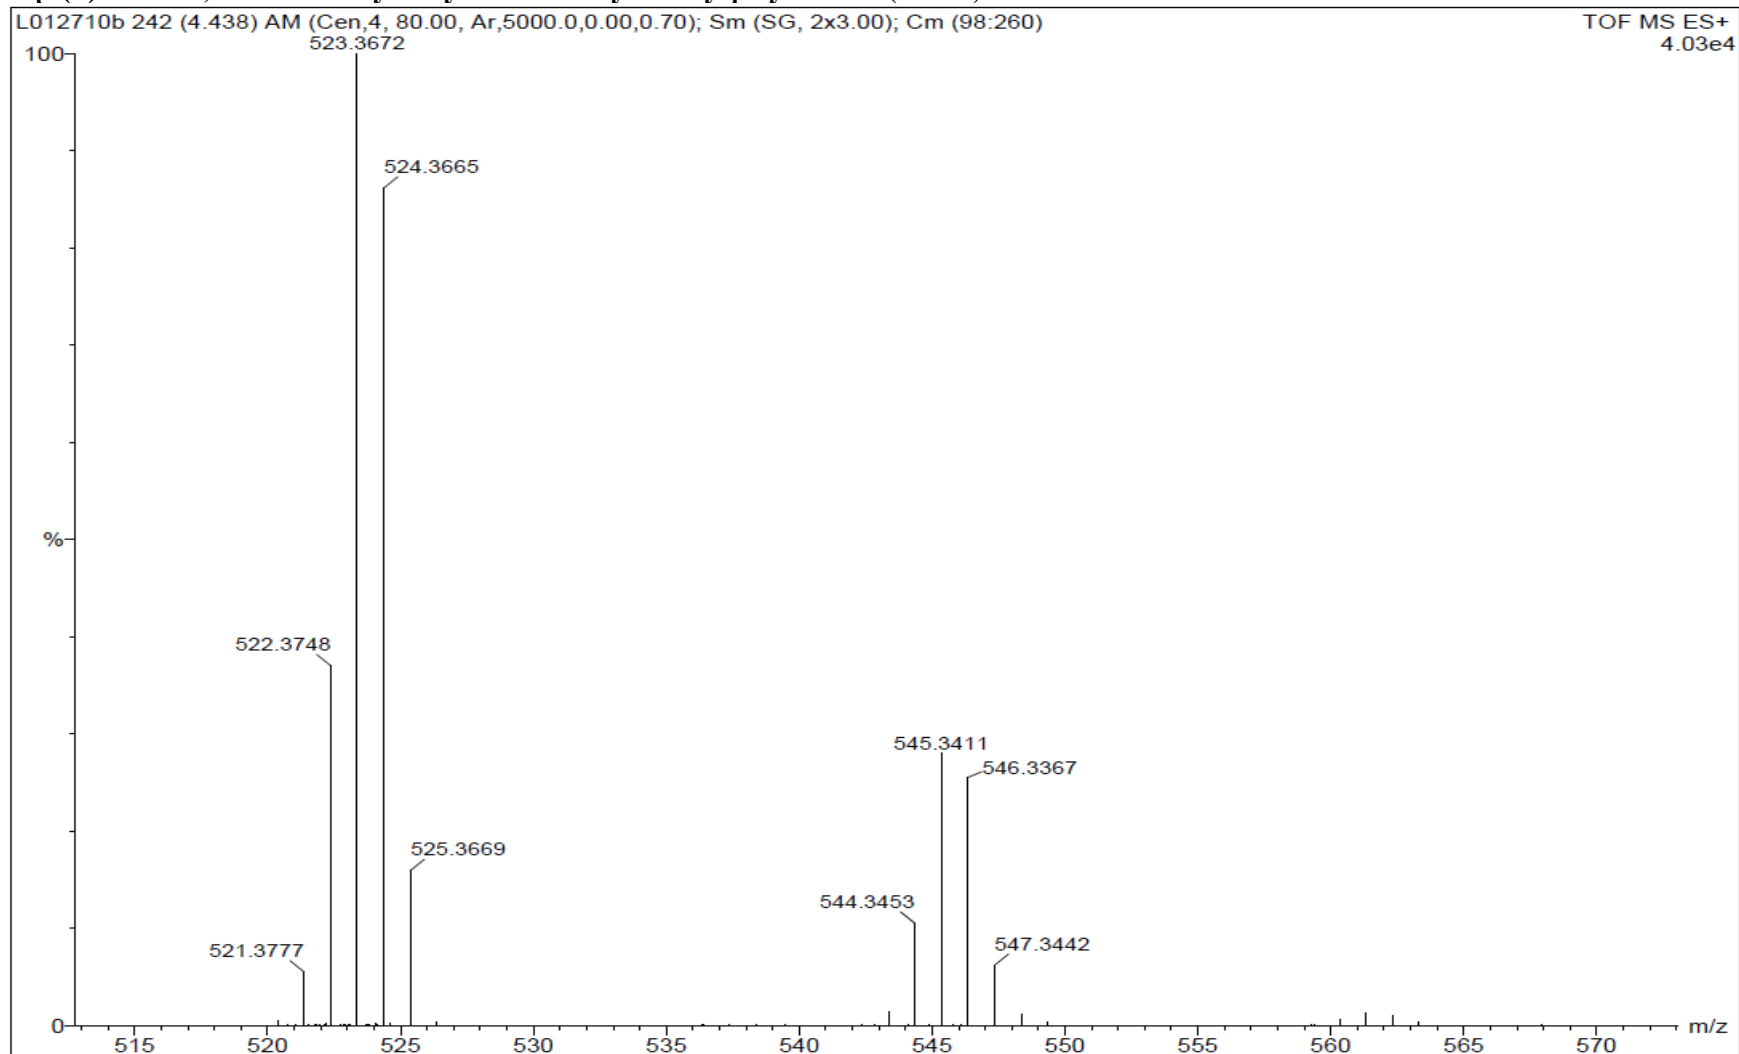

**3-[1(2)-*closo*-1,7-Carboranylbutyltetrazol-5-ylmethyl]thymidine (9d1/2).** Analytical traces in Water:Acetonitrile gradient

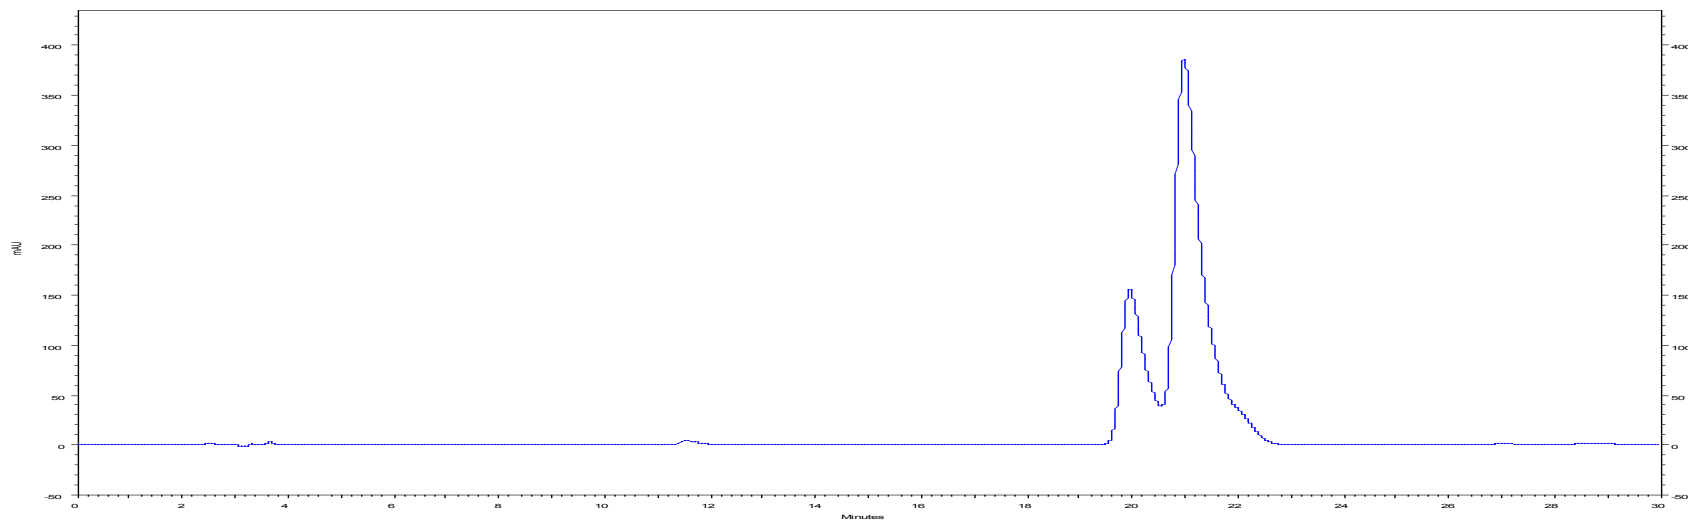

Analytical traces in Water:Methanol gradient

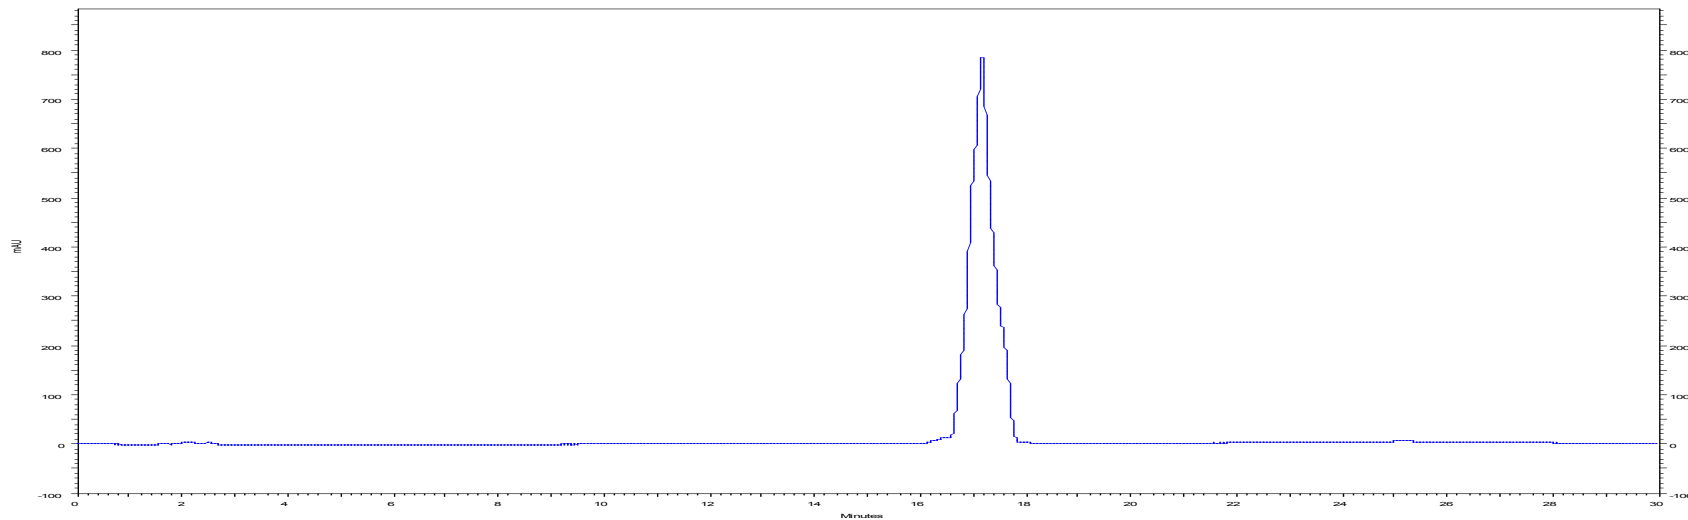

3-(Tetrazol-5-yl)thymidine (10). <sup>1</sup>H NMR

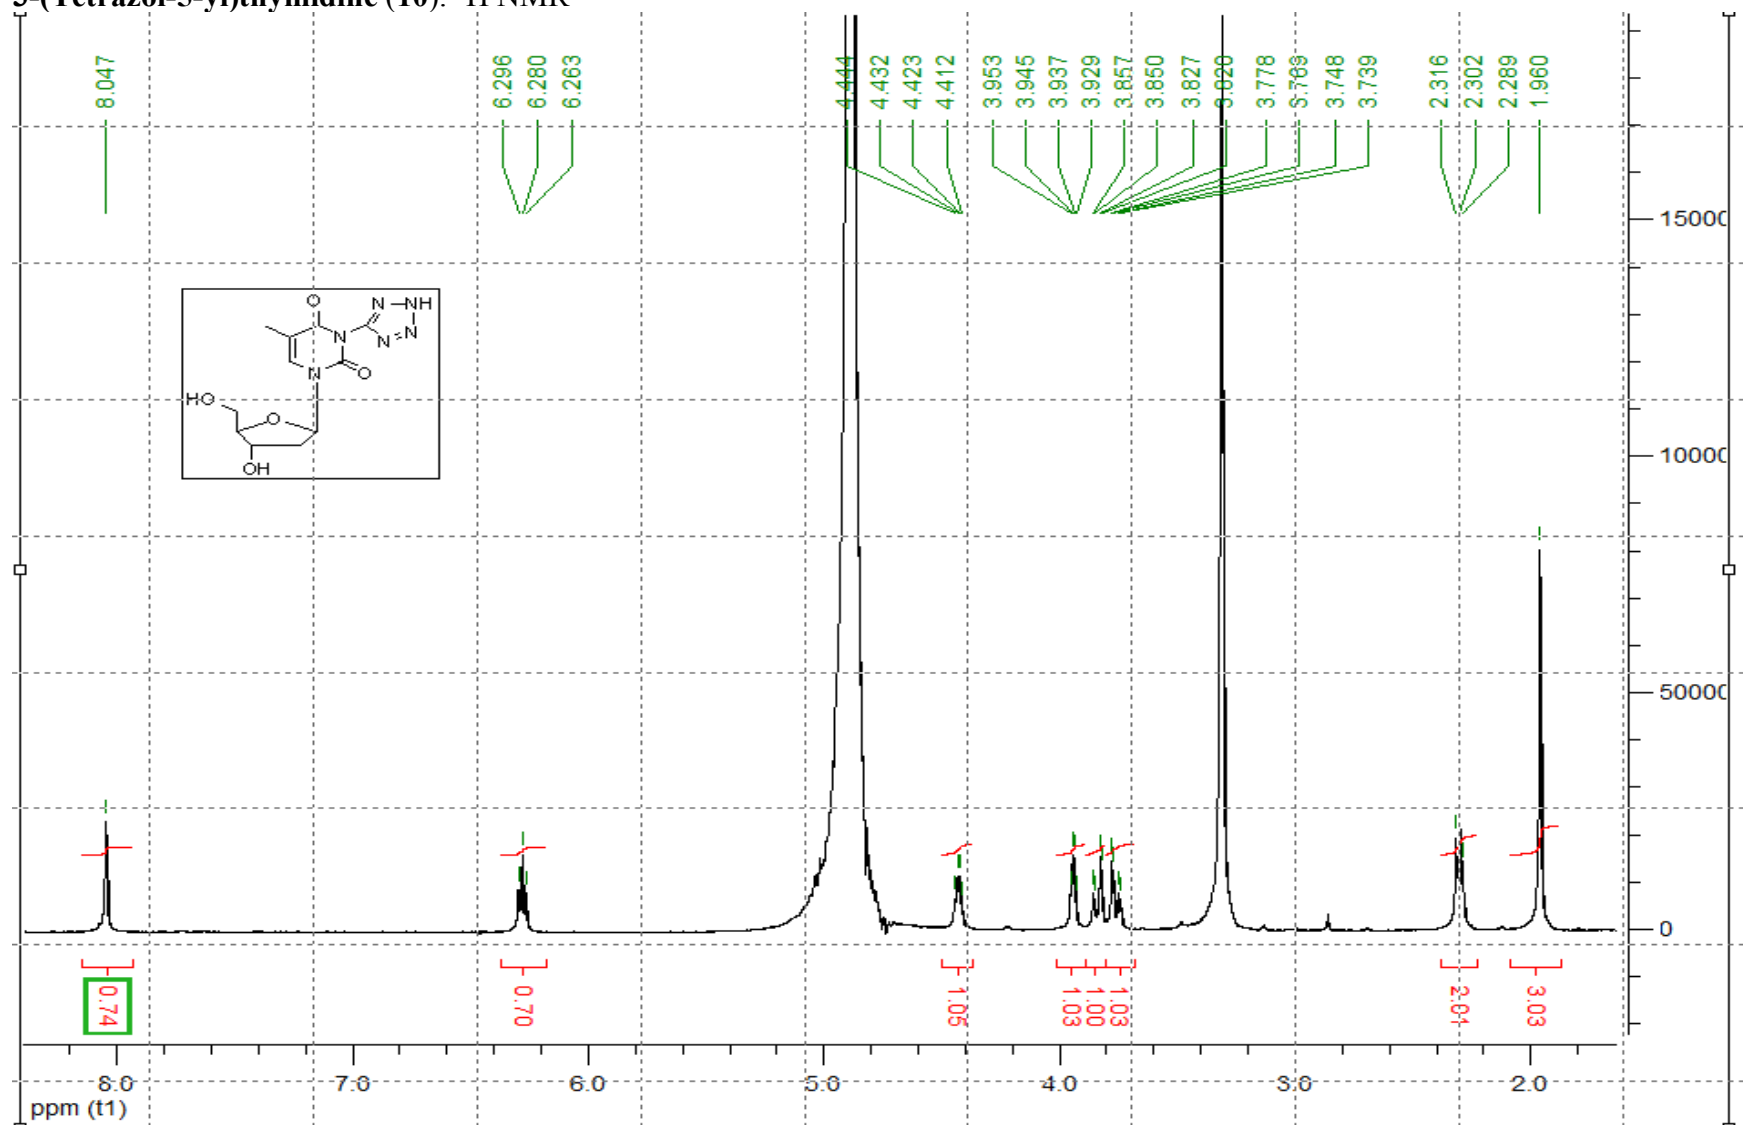

3-(Tetrazol-5-yl)thymidine (10). <sup>13</sup>C NMR

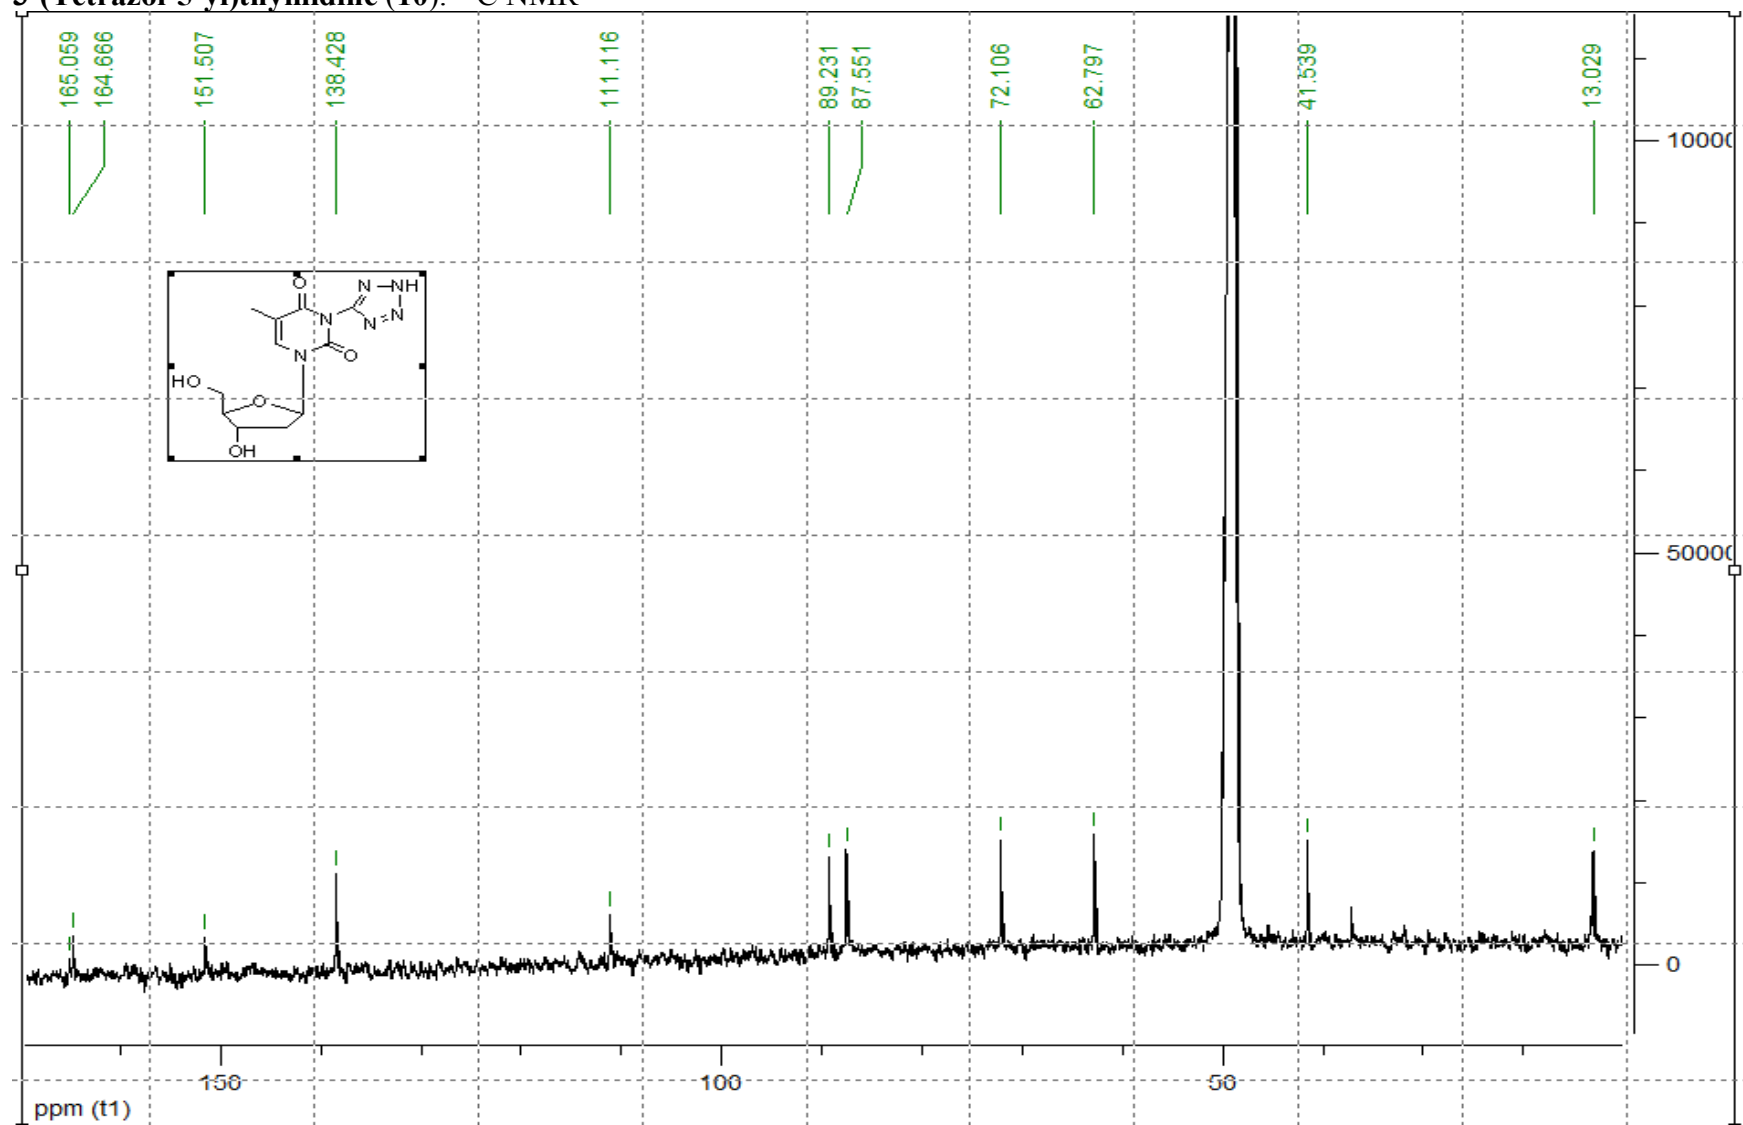



**3-(Tetrazol-5-yl)thymidine (10)**. HR-ESI-MS found: 333.0939.

L100109H 192 (3.521) AM (Cen,4, 80.00, Ar,5000.0,0.00,0.70); Sm (SG, 2x3.00); Cm (102:218)

TOF MS ES+  
3.98e5

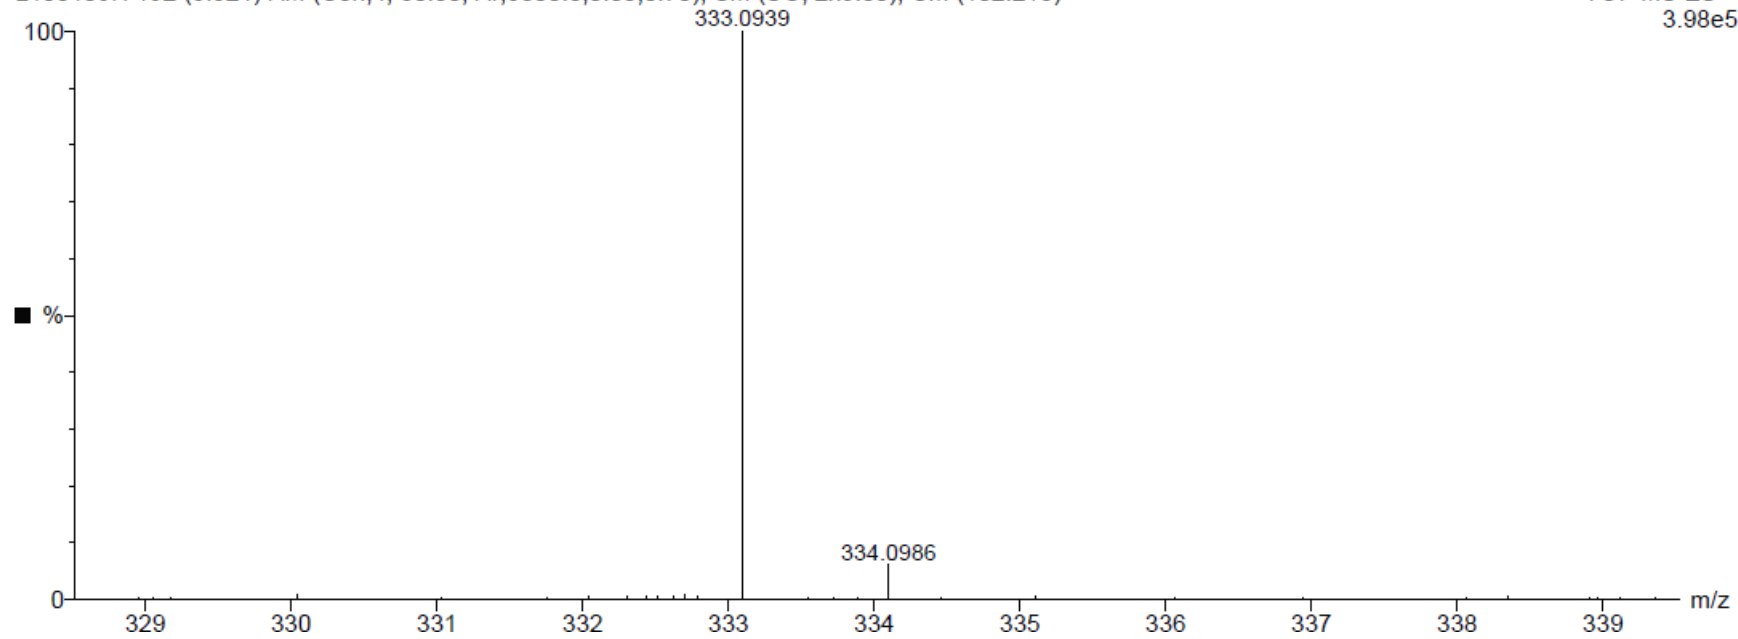

**3-(Tetrazol-5-yl)thymidine (10).** Analytical traces in Water:Acetonitrile gradient

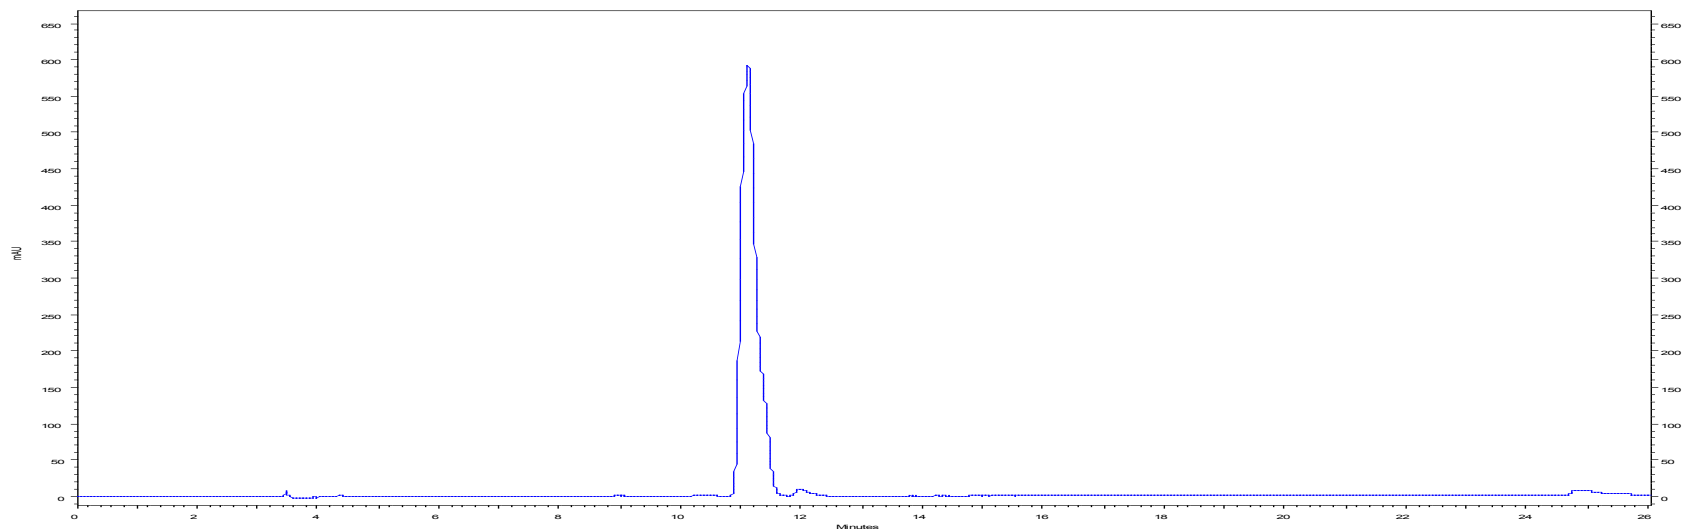

Analytical traces in Water:Methanol gradient

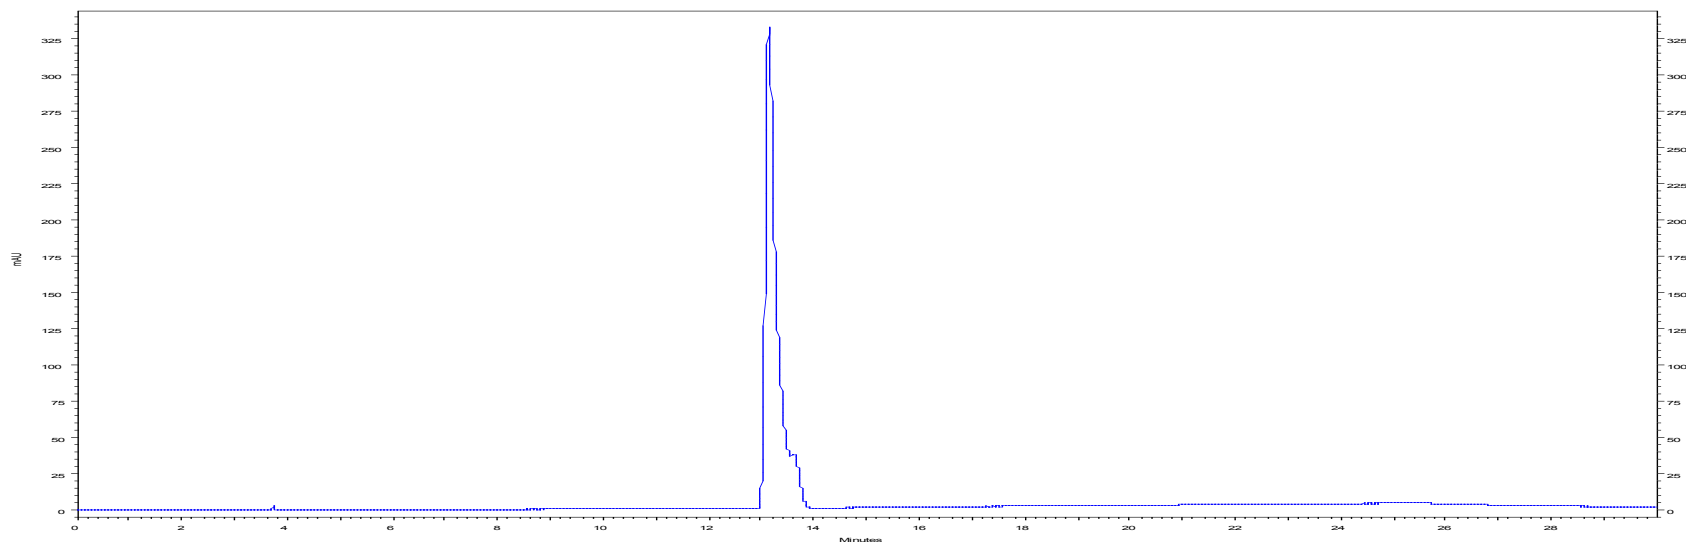

3-[1(2)-Propyltetrazol-5-yl]thymidine (11a). <sup>1</sup>H NMR

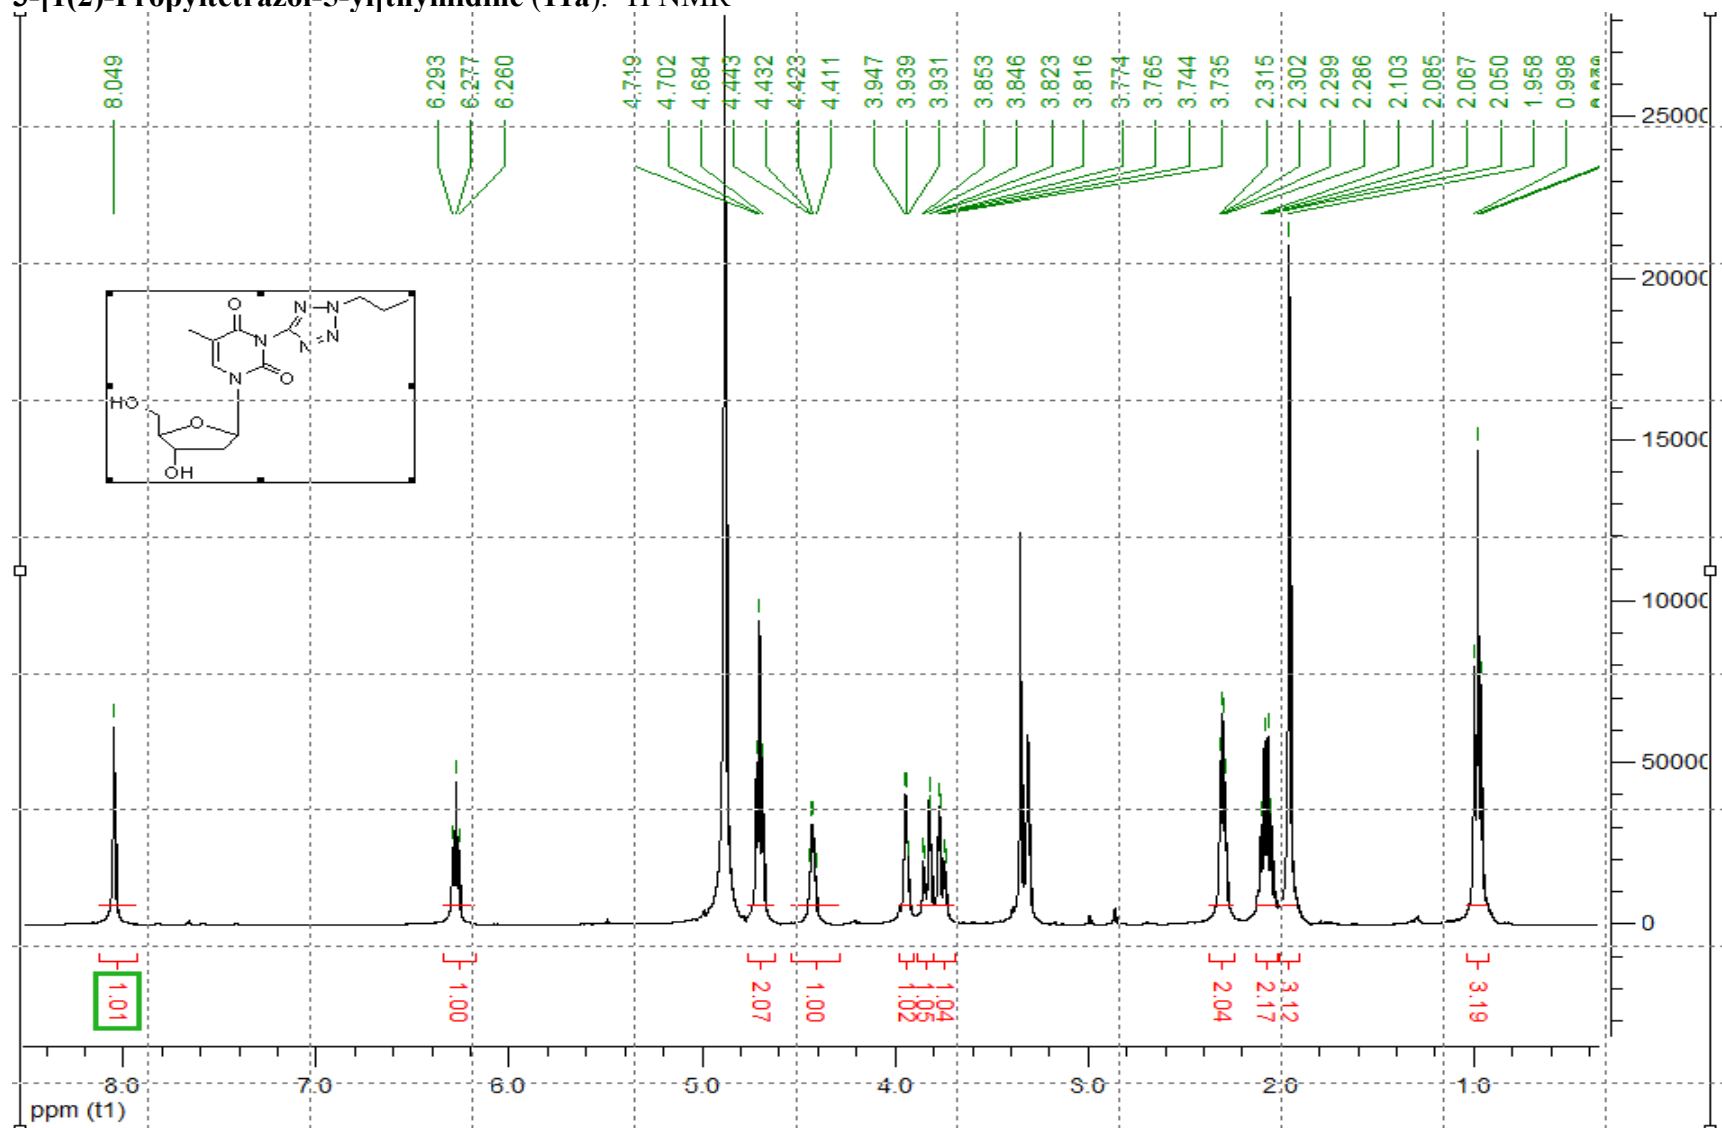

3-[1(2)-Propyltetrazol-5-yl]thymidine (11a). <sup>13</sup>C NMR

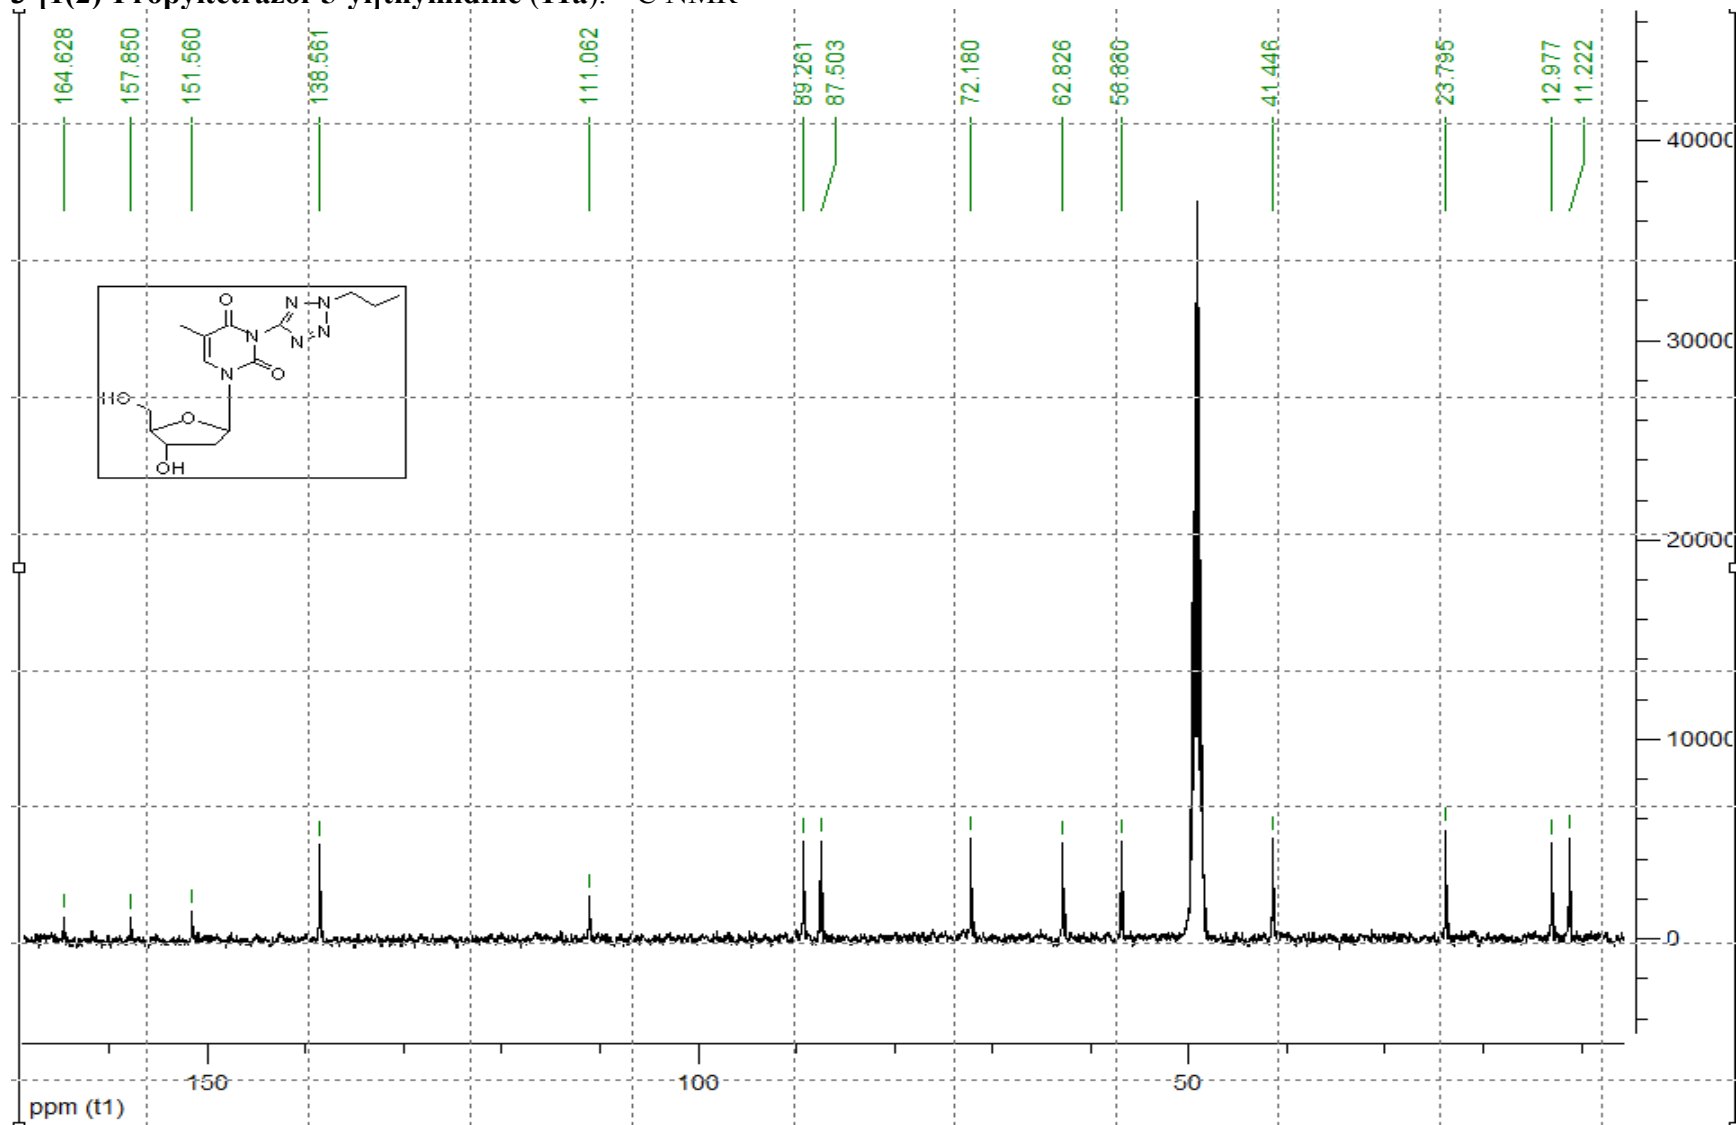

**3-[1(2)-Propyltetrazol-5-yl]thymidine (11a). HR-ESI-MS: 375.1409.**

L111910C 355 (12.431) AM (Cen,4, 80.00, Ar,5000.0,0.00,0.70); Sm (SG, 2x3.00); Cm (353:366)

TOF MS ES+  
3.45e4

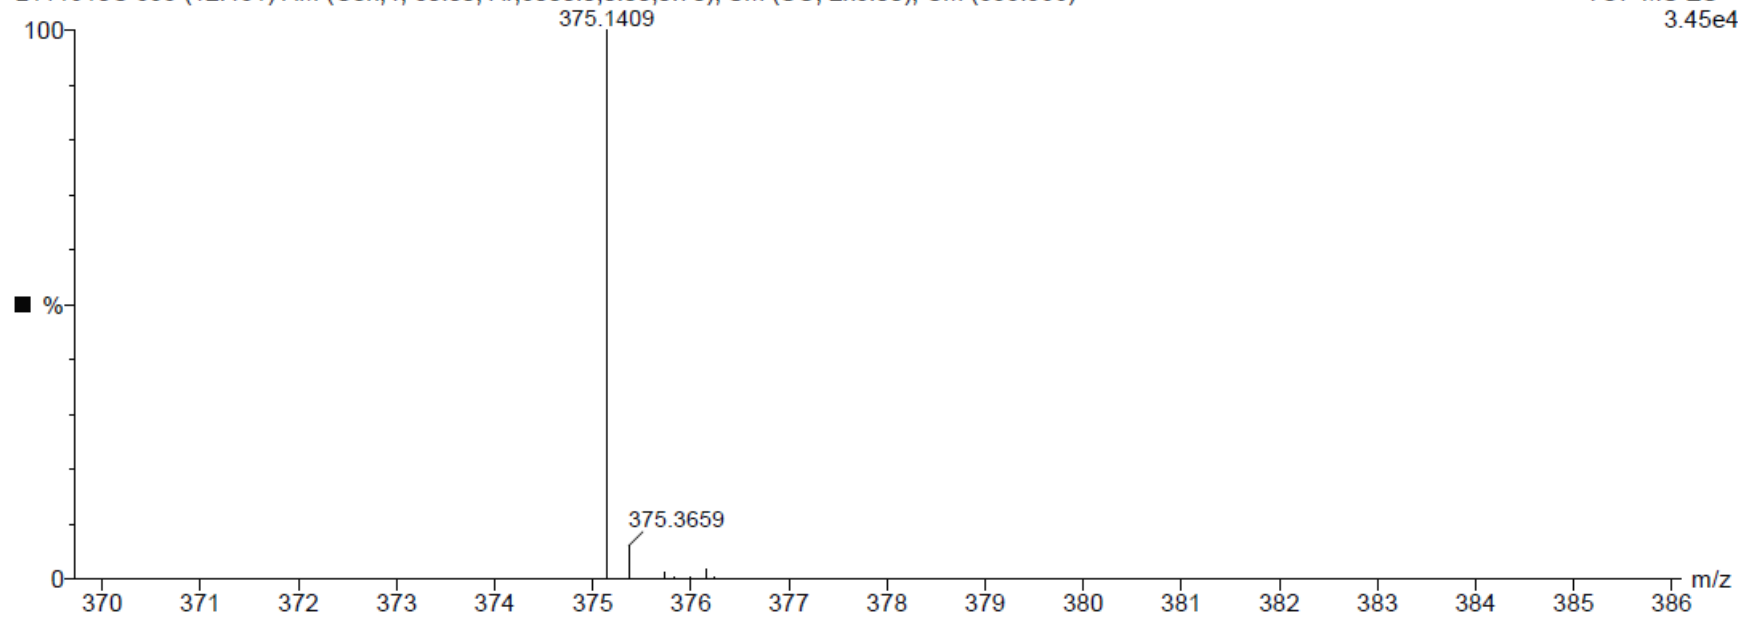

**3-[1(2)-Propyltetrazol-5-yl]thymidine (11a).** Analytical traces in Water:Acetonitrile gradient

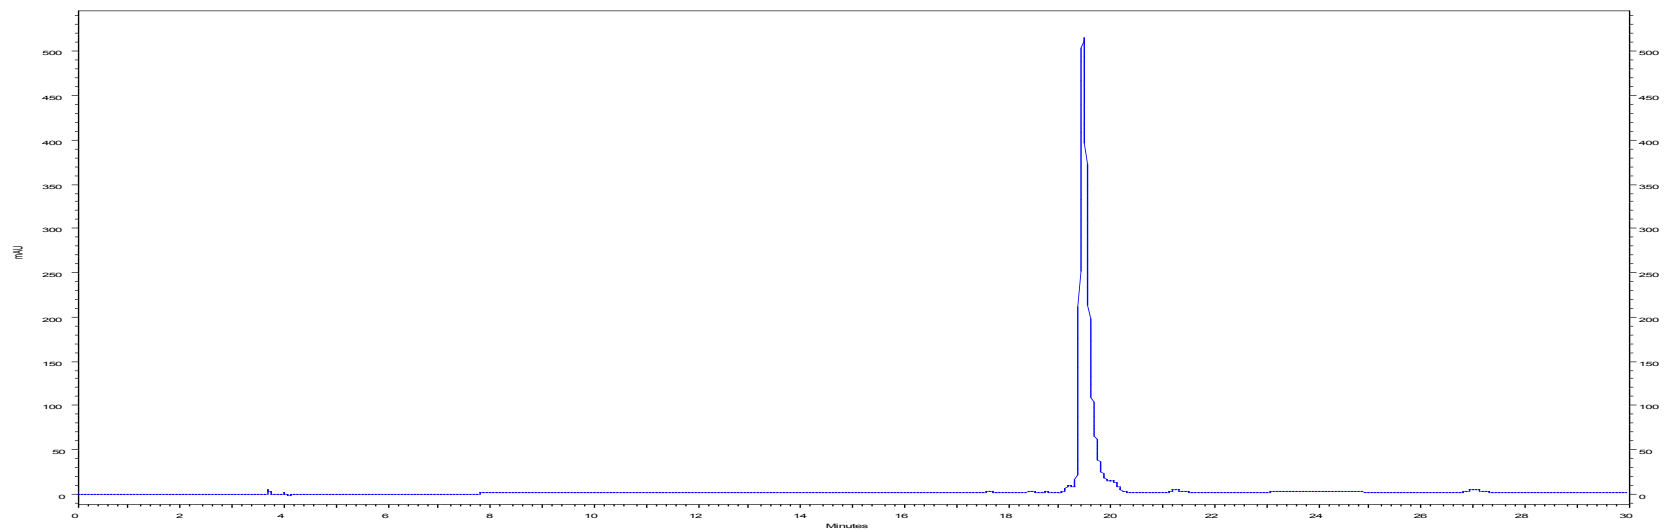

Analytical traces in Water:Methanol gradient

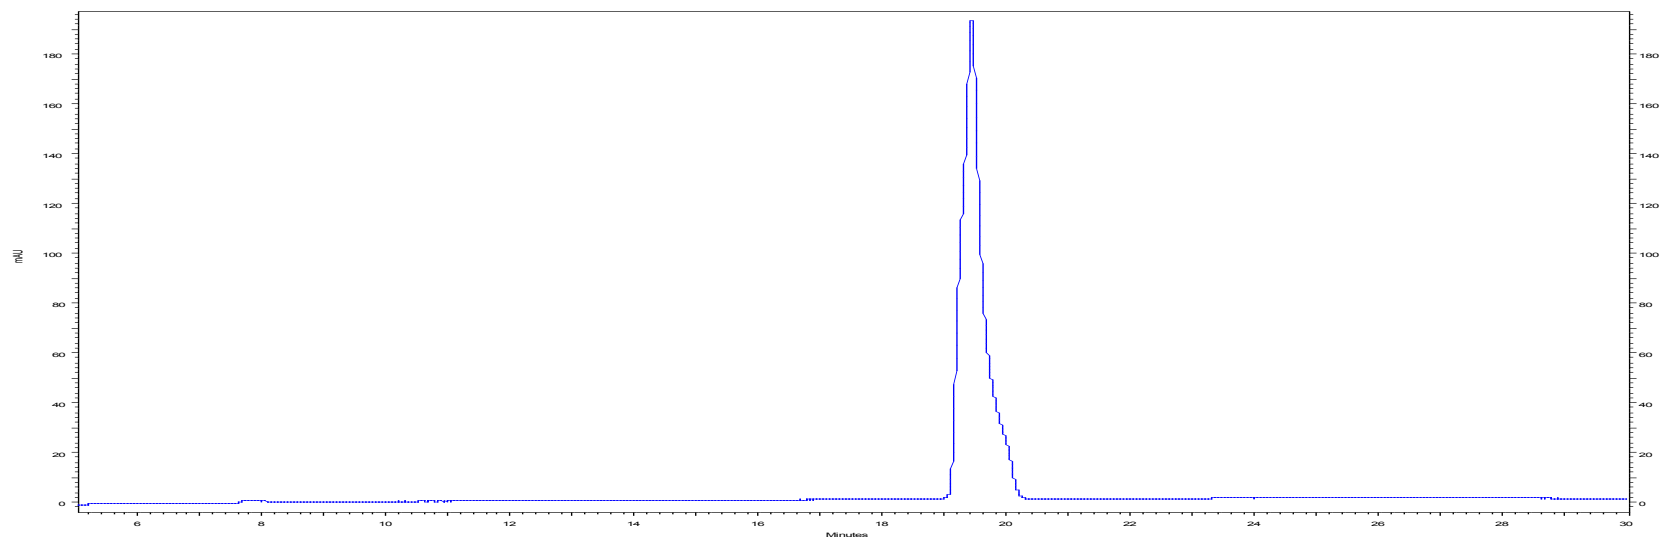

3-[1(2)-*closo*-1,7-Carboranylethyltetrazol-5-yl]thymidine (11b1/2). <sup>1</sup>H NMR

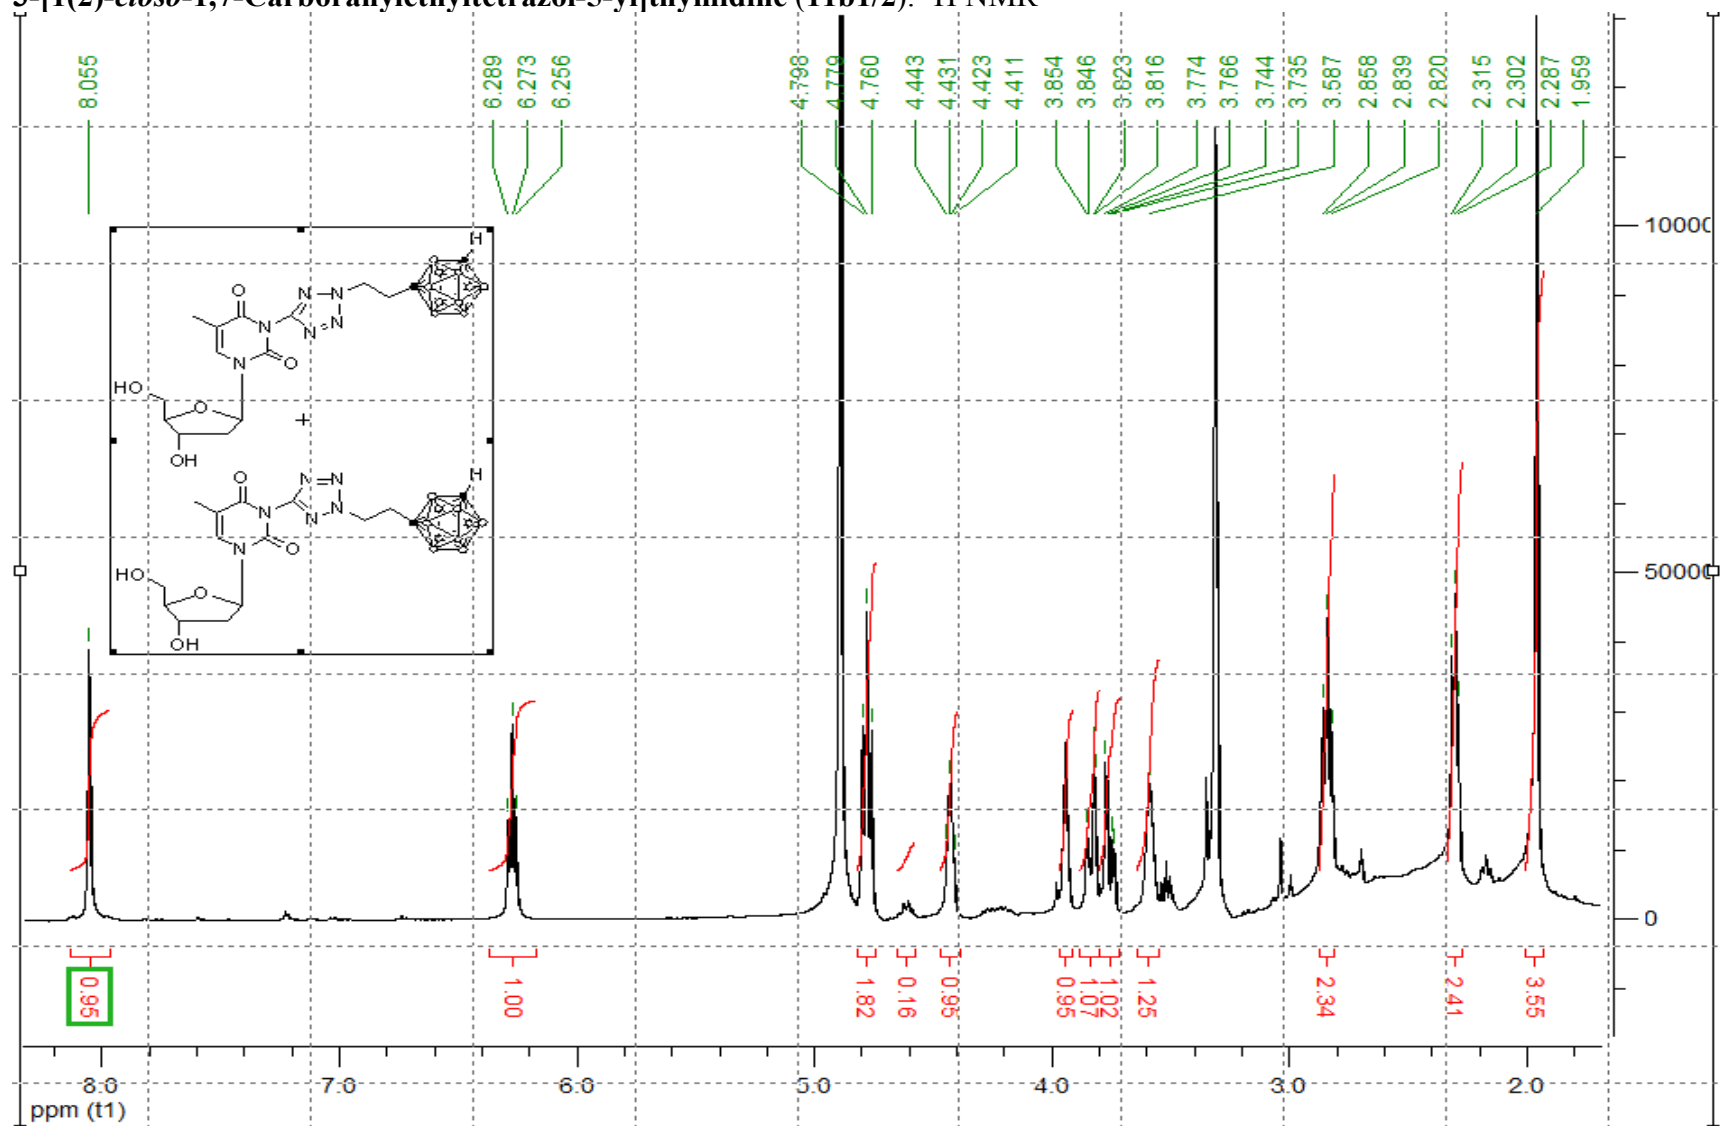

3-[1(2)-*closo*-1,7-Carboranylethyltetrazol-5-yl]thymidine (11b1/2). <sup>13</sup>C NMR

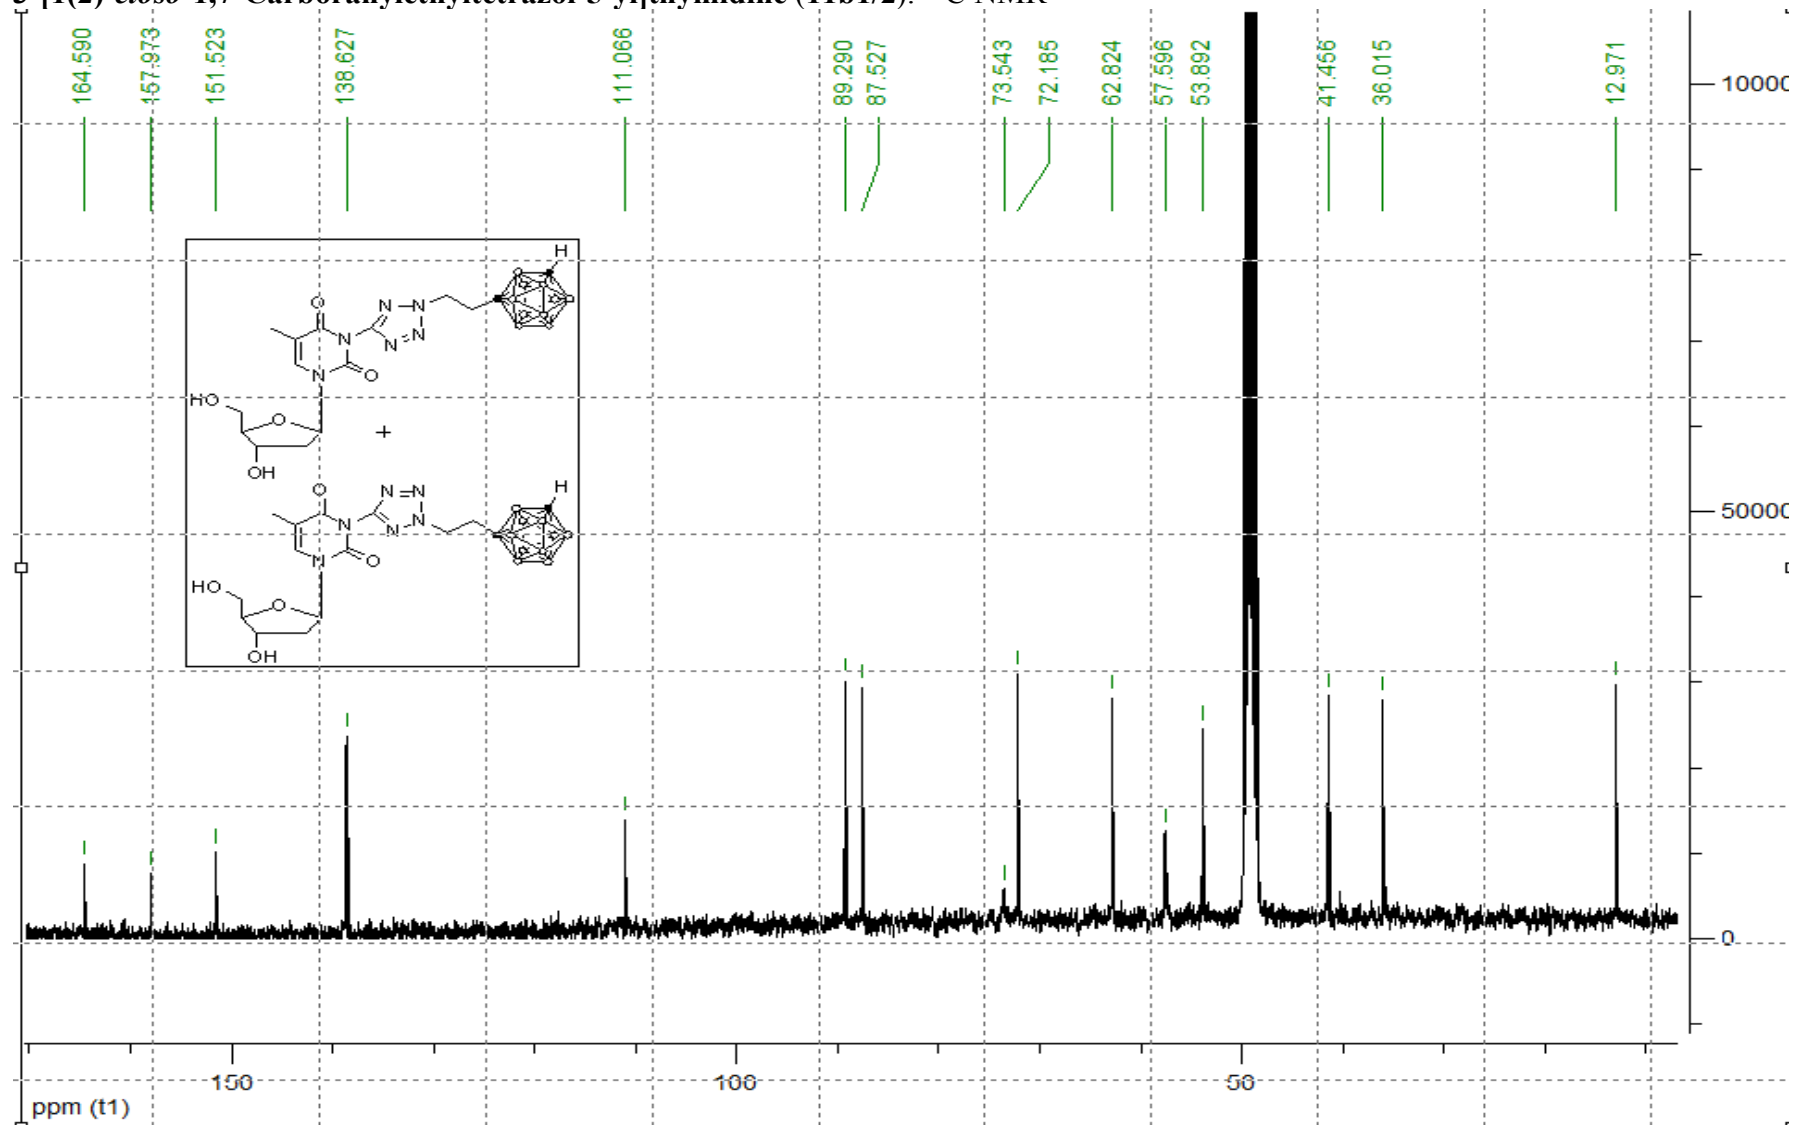



3-[1(2)-*closo*-1,7-Carboranylethyltetrazol-5-yl]thymidine (11b1/2). HR-ESI-MS found: 503.3067.

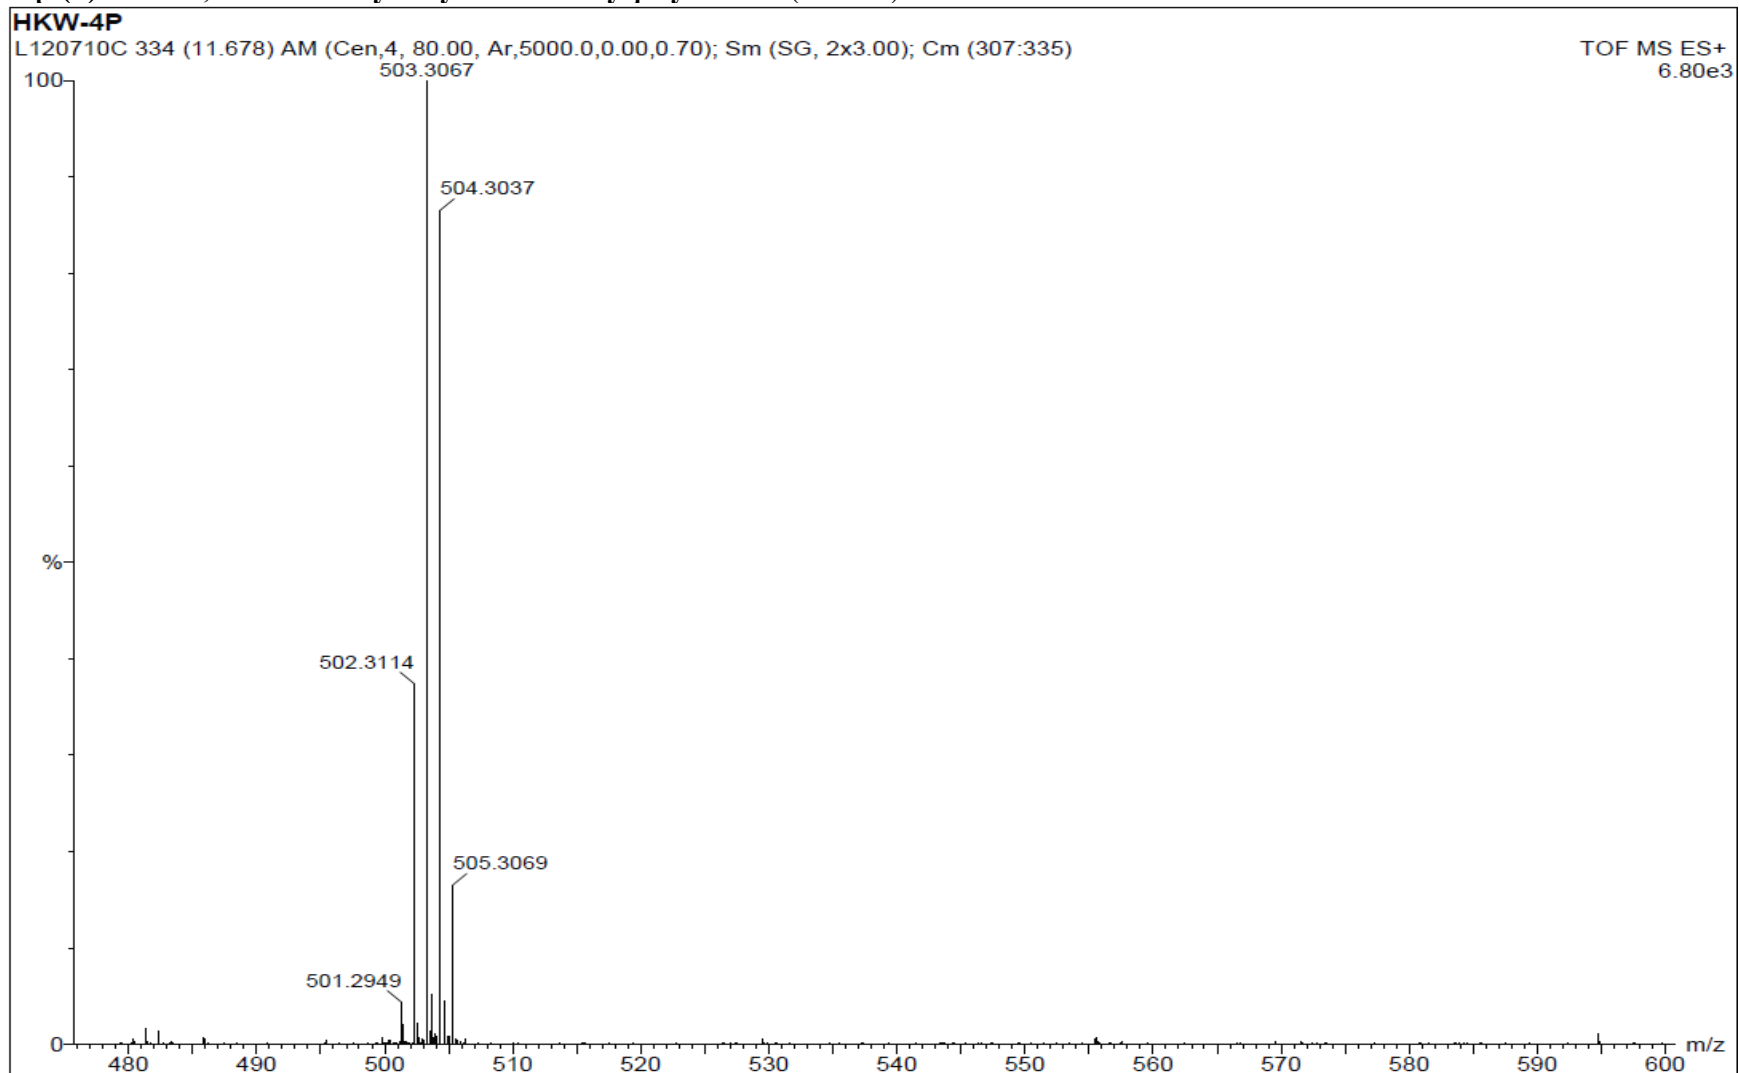

3-[1(2)-*closo*-1,7-Carboranylethyltetrazol-5-yl]thymidine (11b1/2). Analytical traces in Water:Acetonitrile gradient

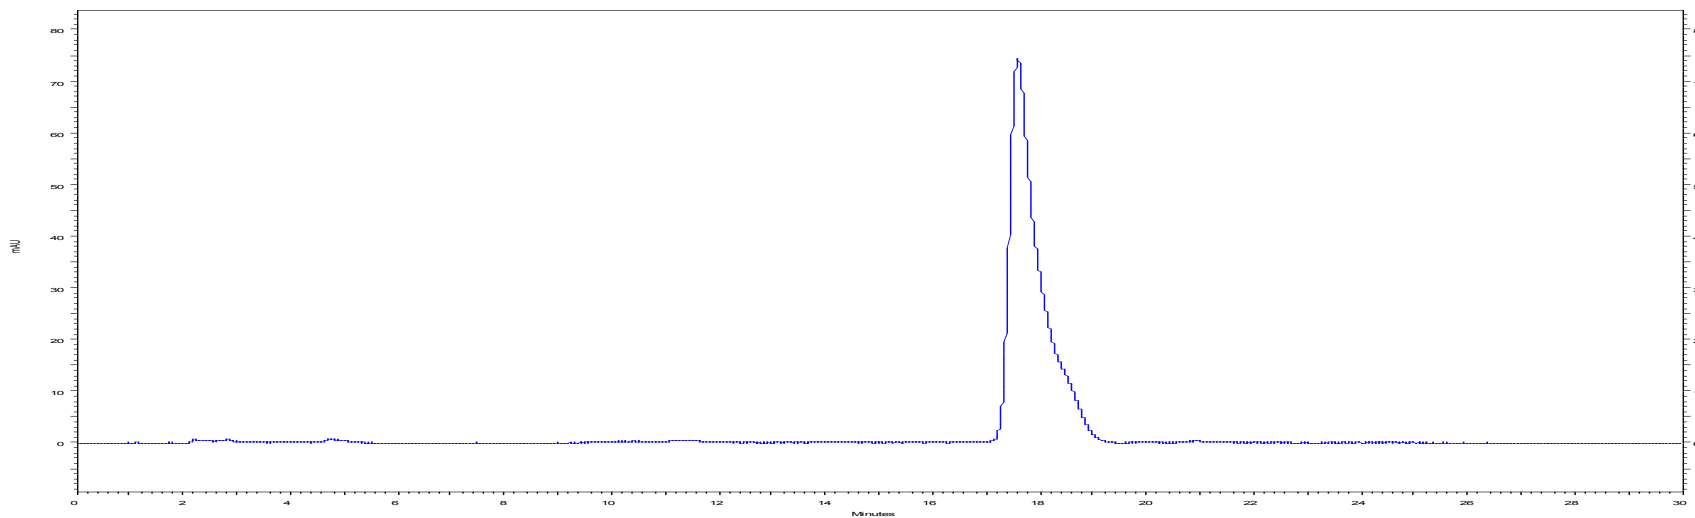

Analytical traces in Water:Methanol gradient

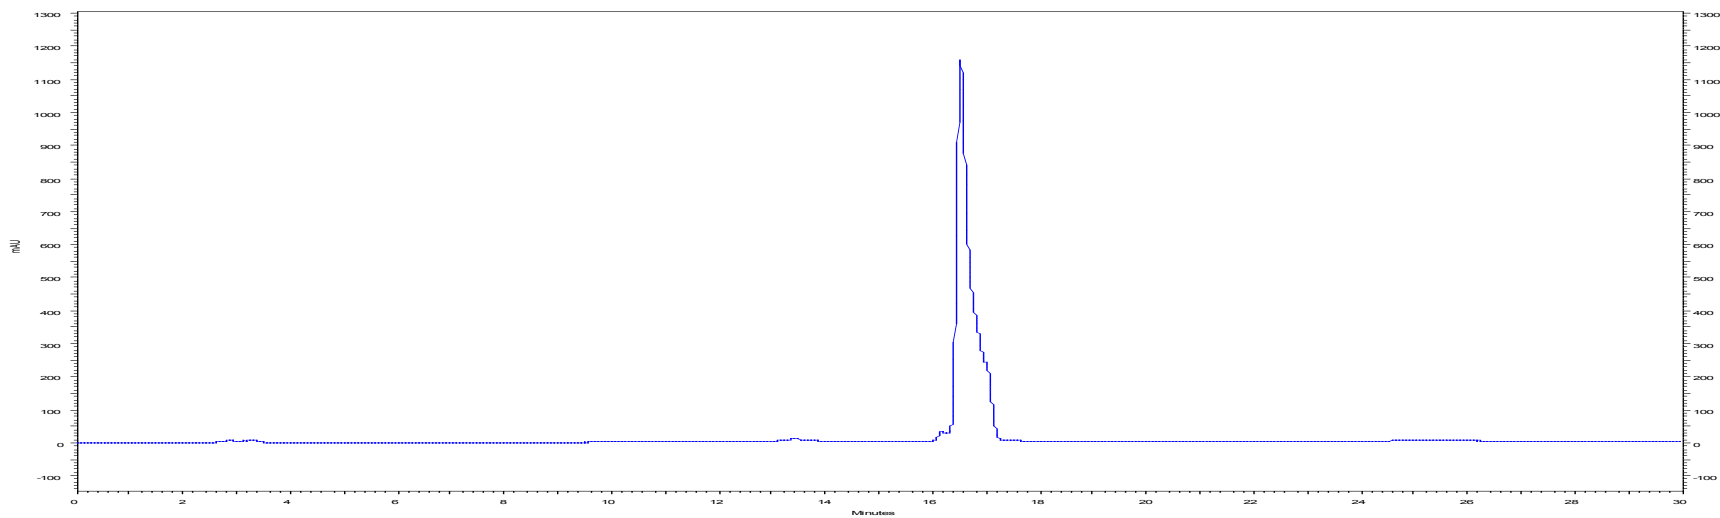

3-[1(2)-*closo*-1,7-Carboranylpropyltetrazol-5-yl]thymidine (11c1/2). <sup>1</sup>H NMR

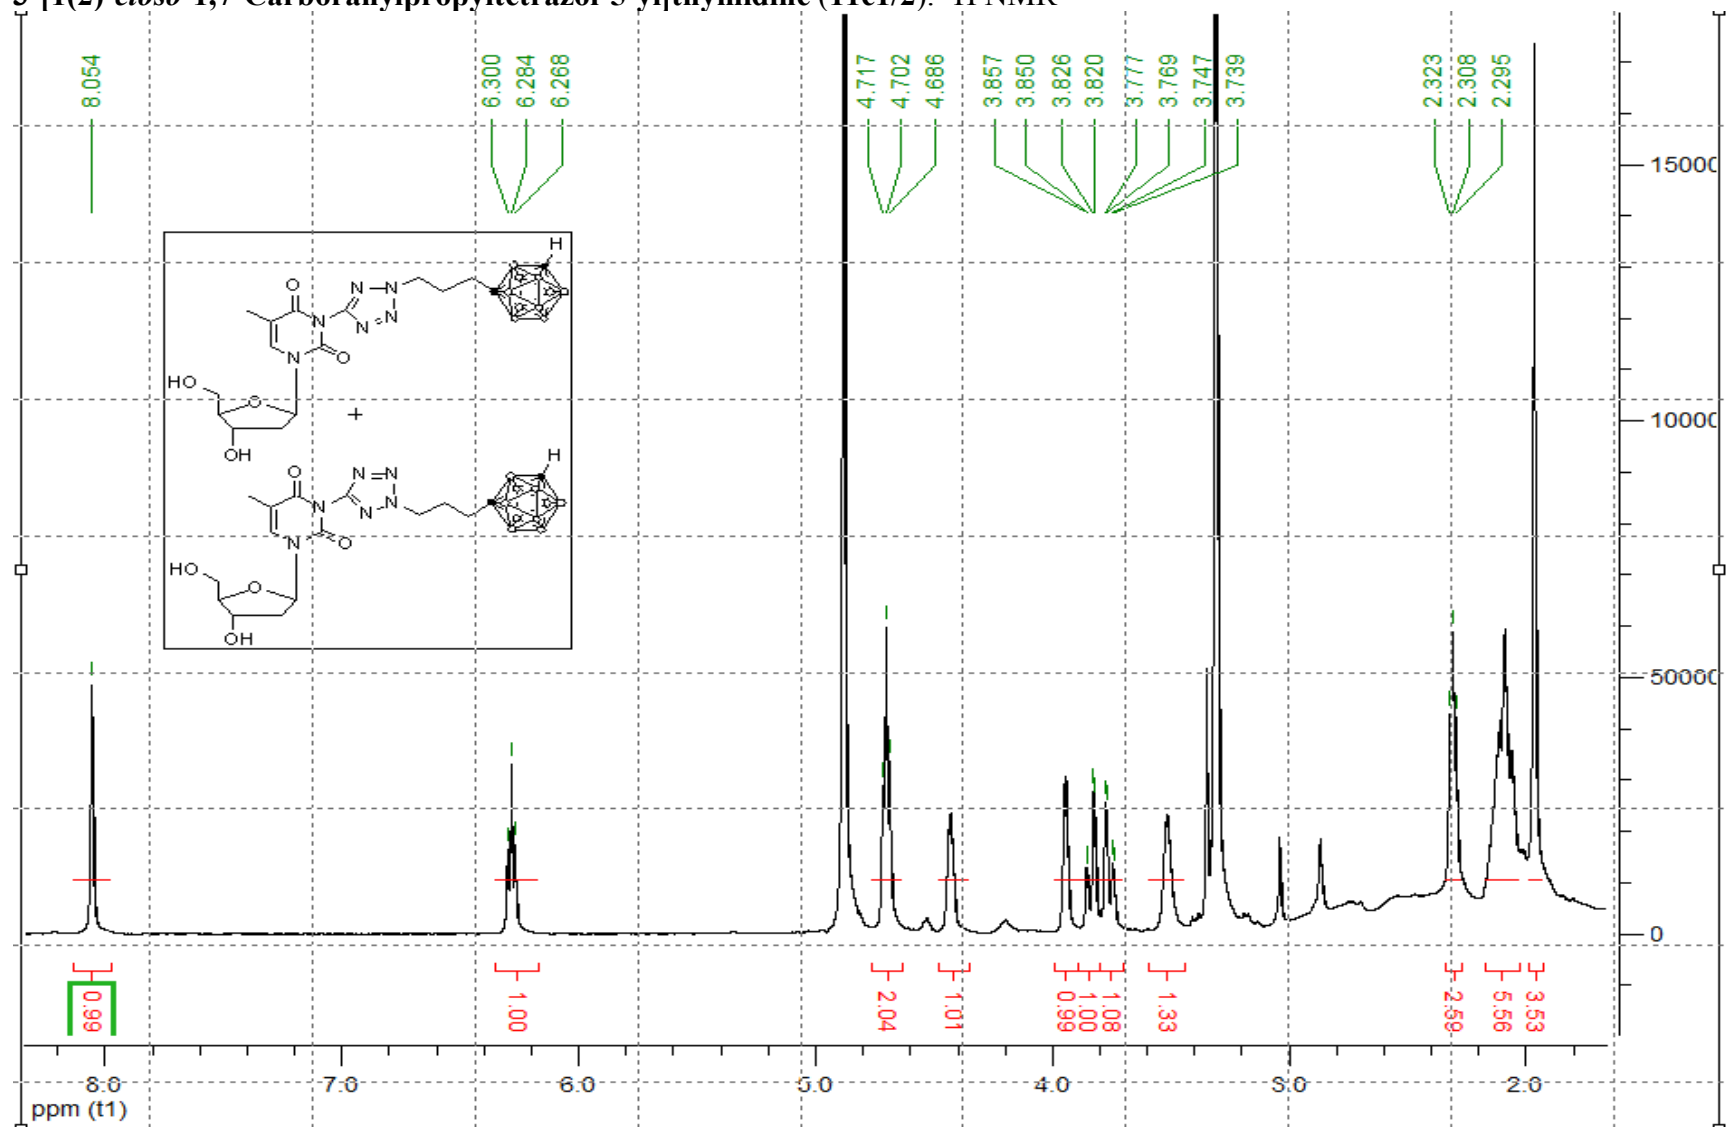

3-[1(2)-*closo*-1,7-Carboranylpropyltetrazol-5-yl]thymidine (11c1/2). <sup>13</sup>C NMR

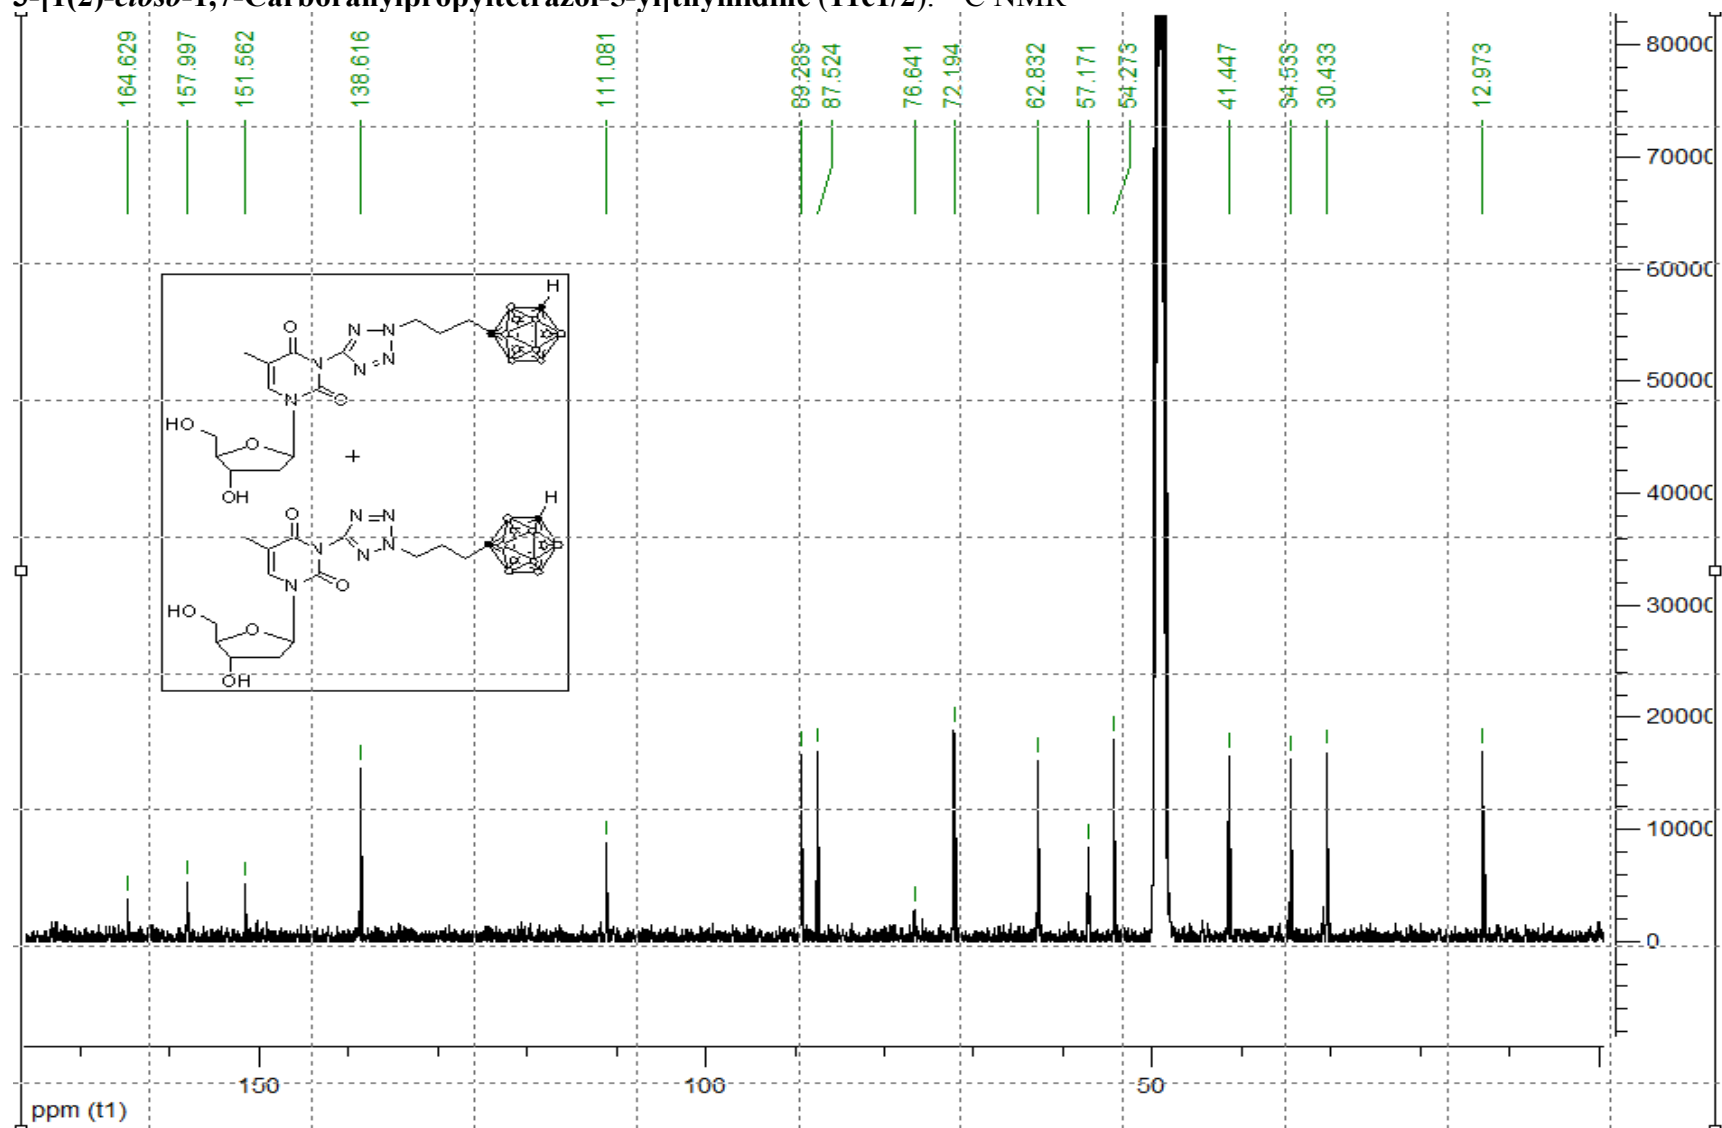

3-[1(2)-*closo*-1,7-Carboranylpropyltetrazol-5-yl]thymidine (11c1/2). HR-ESI-MS found: 517.3128.

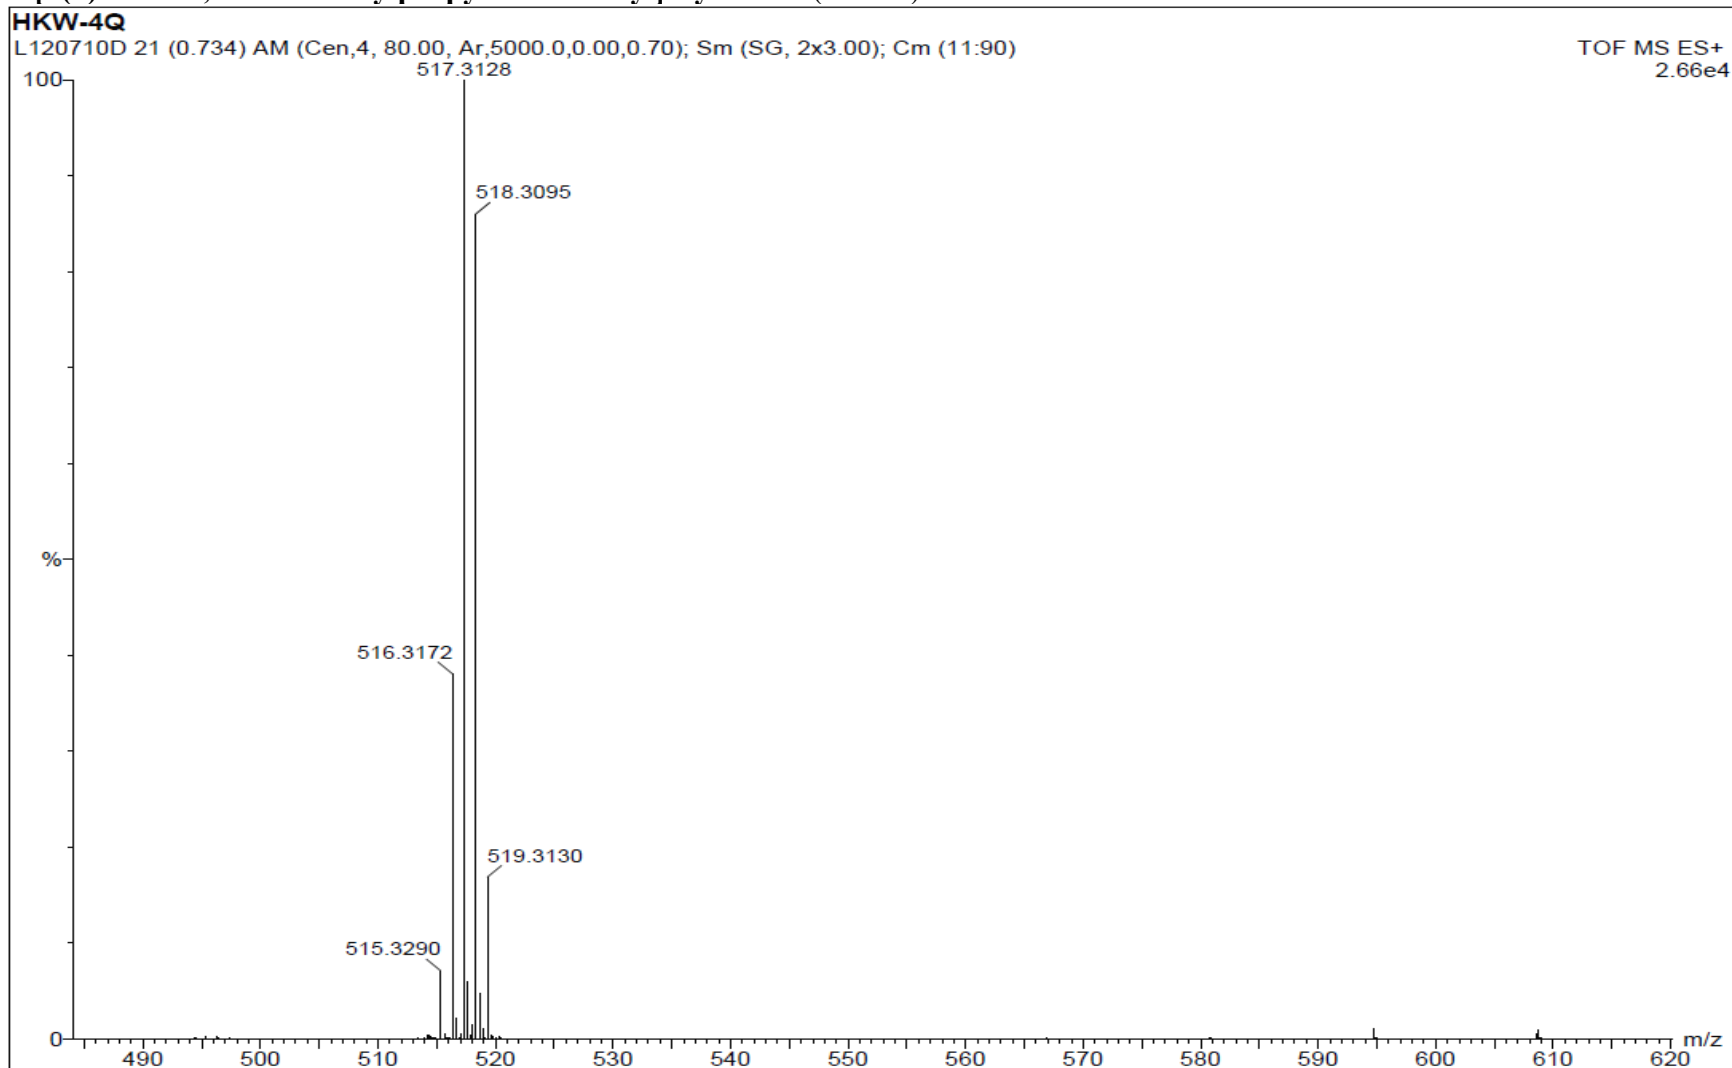

3-[1(2)-*closo*-1,7-Carboranylpropyltetrazol-5-yl]thymidine (11c1/2). Analytical traces in Water:Acetonitrile gradient

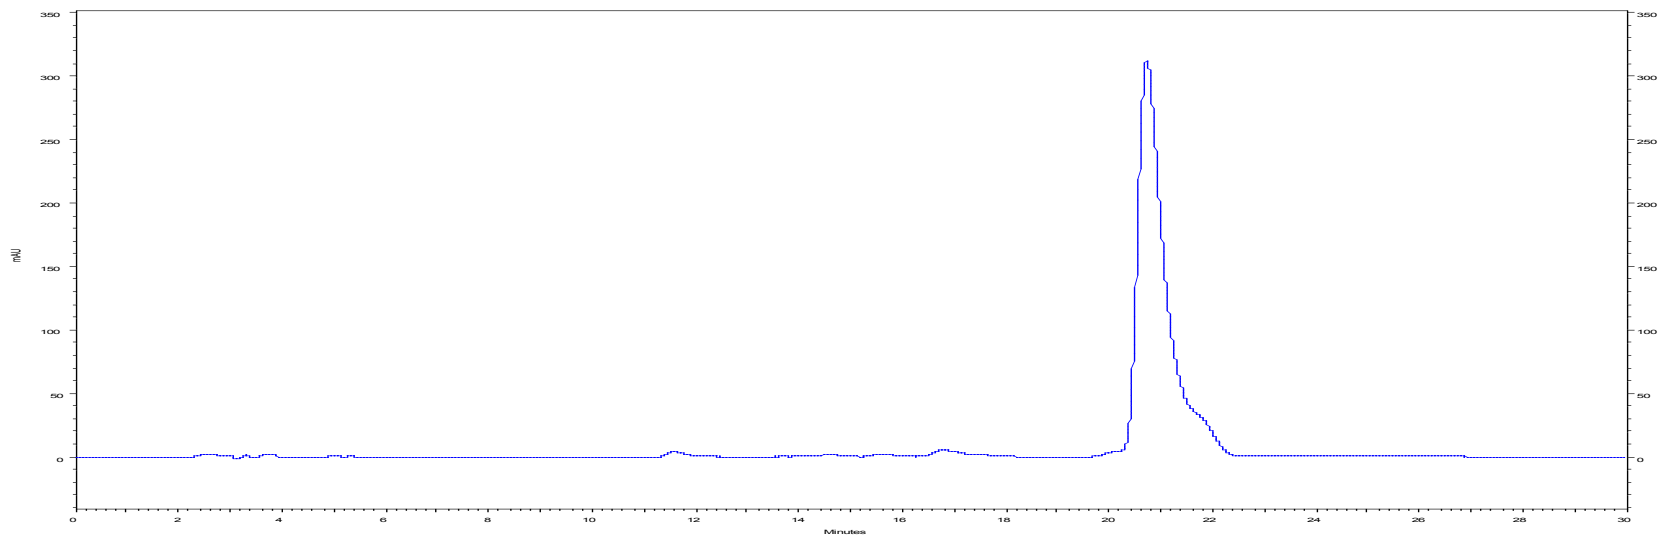

Analytical traces in Water:Methanol gradient

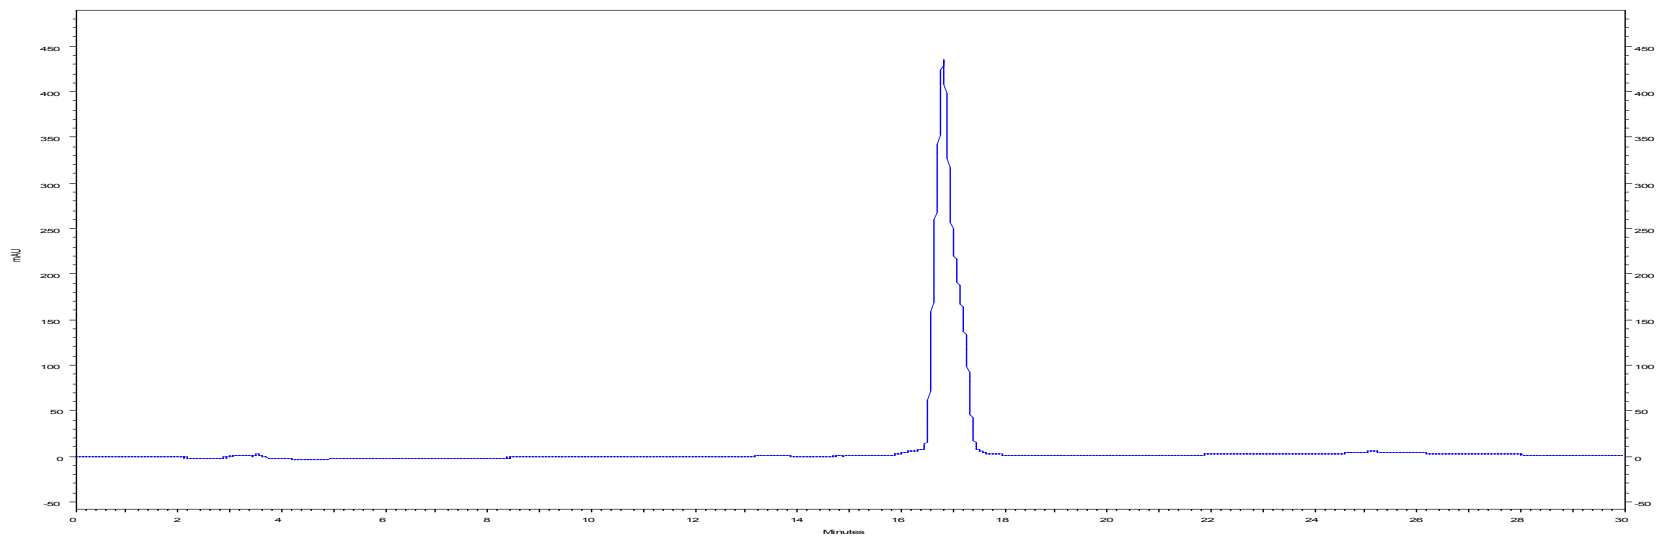

3-[1(2)-*closo*-1,7-Carboranylbutyltetrazol-5-yl]thymidine (11d1/2). <sup>1</sup>H NMR

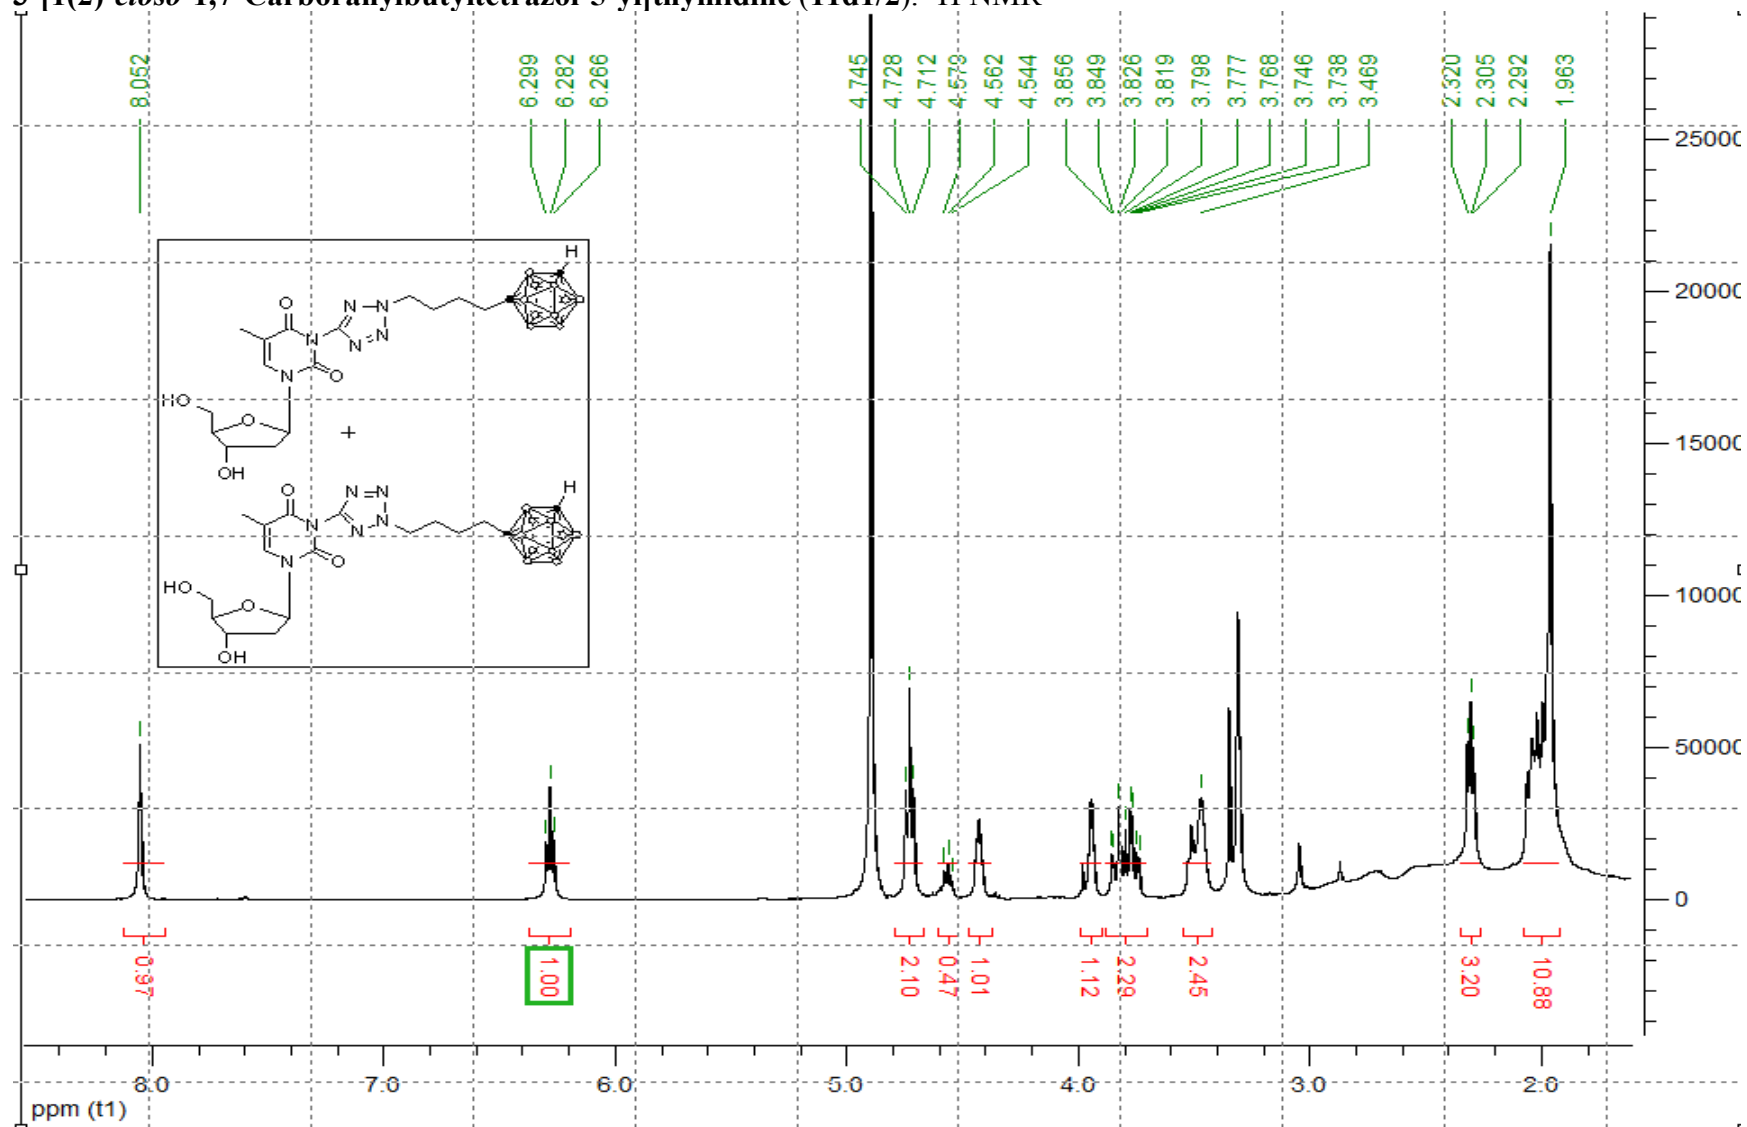

3-[1(2)-*closo*-1,7-Carboranylbutyltetrazol-5-yl]thymidine (11d1/2). <sup>13</sup>C NMR

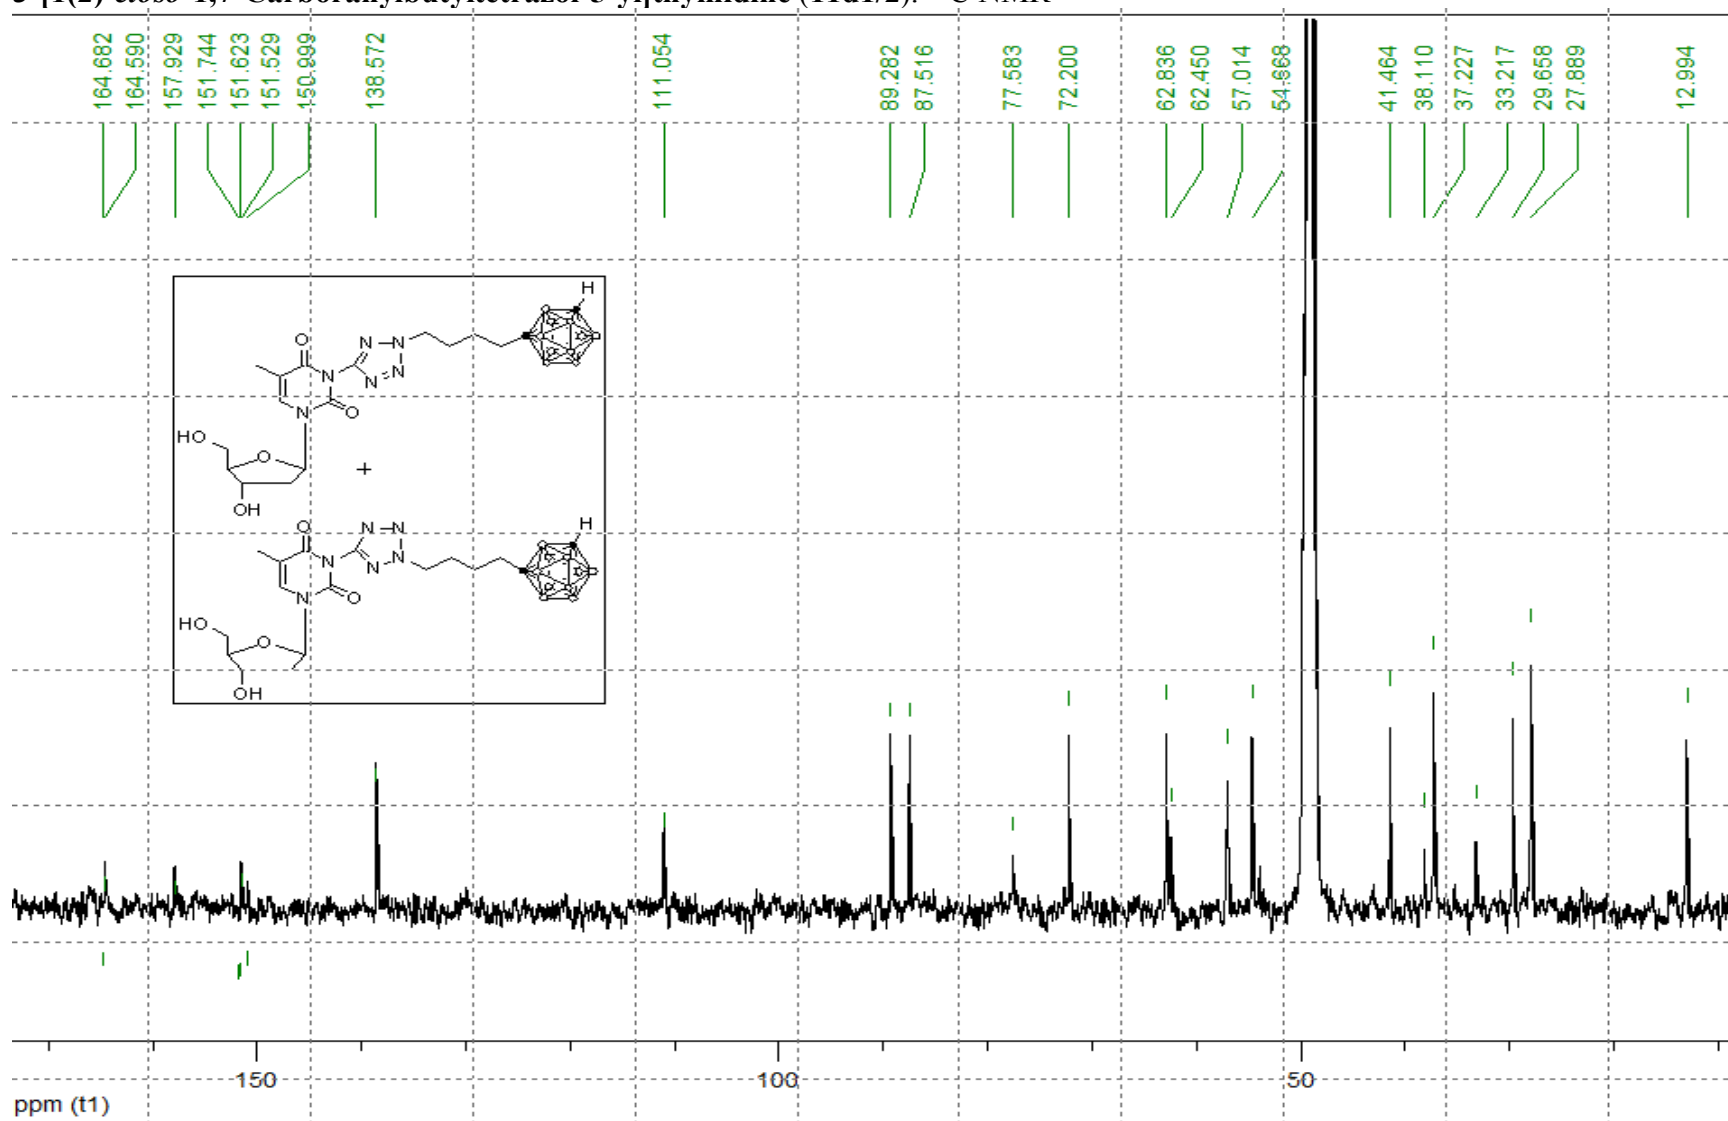



**3-[1(2)-*closo*-1,7-Carboranylbutyltetrazol-5-yl]thymidine (11d1/2)**. HR-ESI-MS found: 509.3475, 531.3385 and 547.3081.

L012710c 227 (4.163) AM (Cen,4, 80.00, Ar,5000.0,0.00,0.70); Sm (SG, 2x3.00); Cm (61:253)

TOF MS ES+  
5.37e3

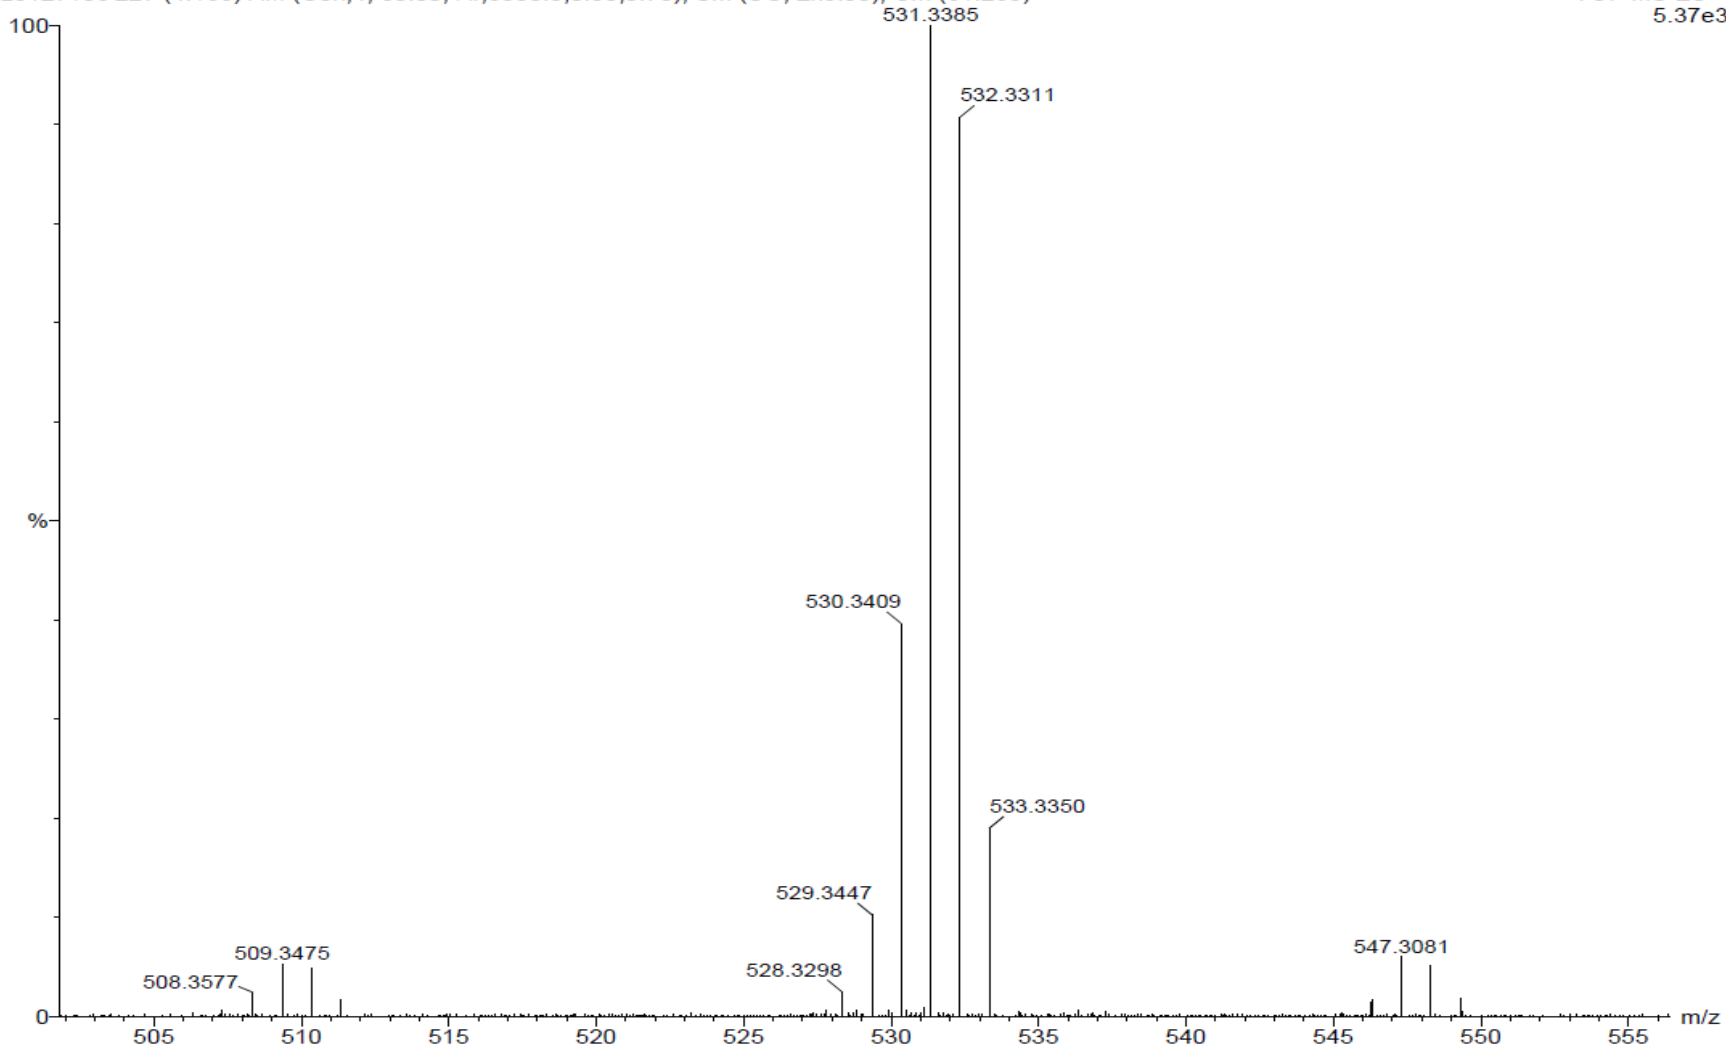

**3-[1(2)-*closo*-1,7-Carboranylbutyltetrazol-5-yl]thymidine (11d1/2). Analytical traces in Water:Acetonitrile gradient**

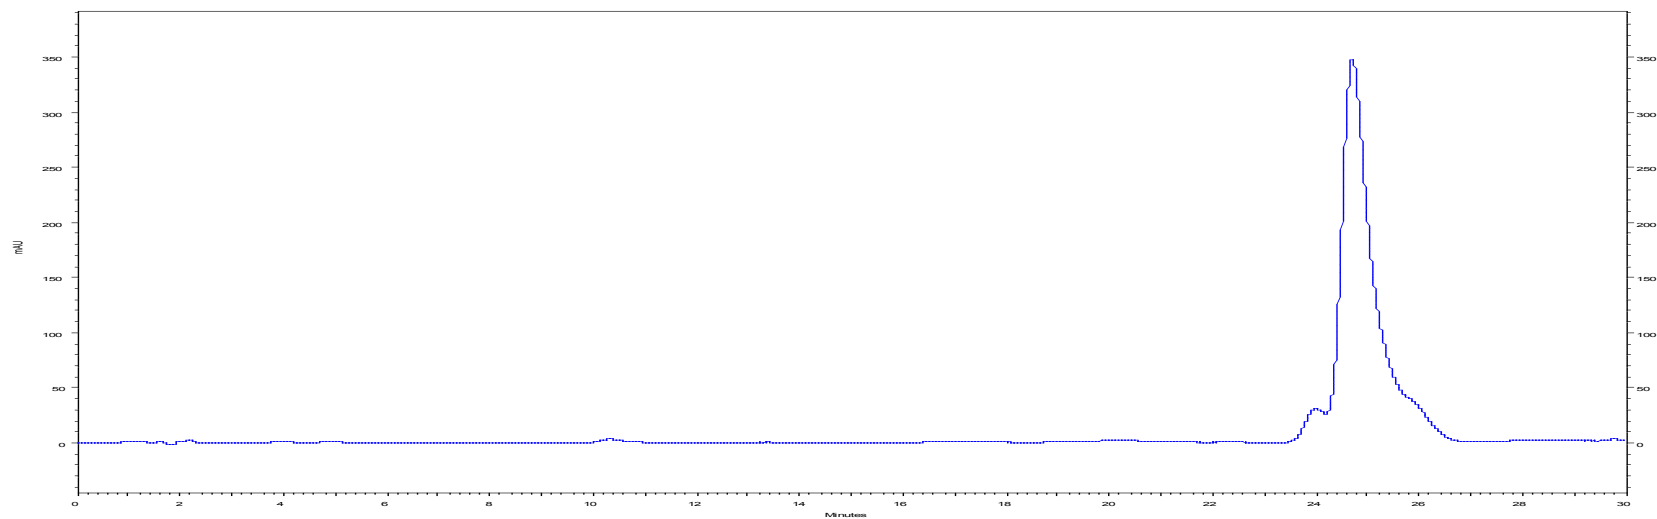

**Analytical traces in Water:Methanol gradient**

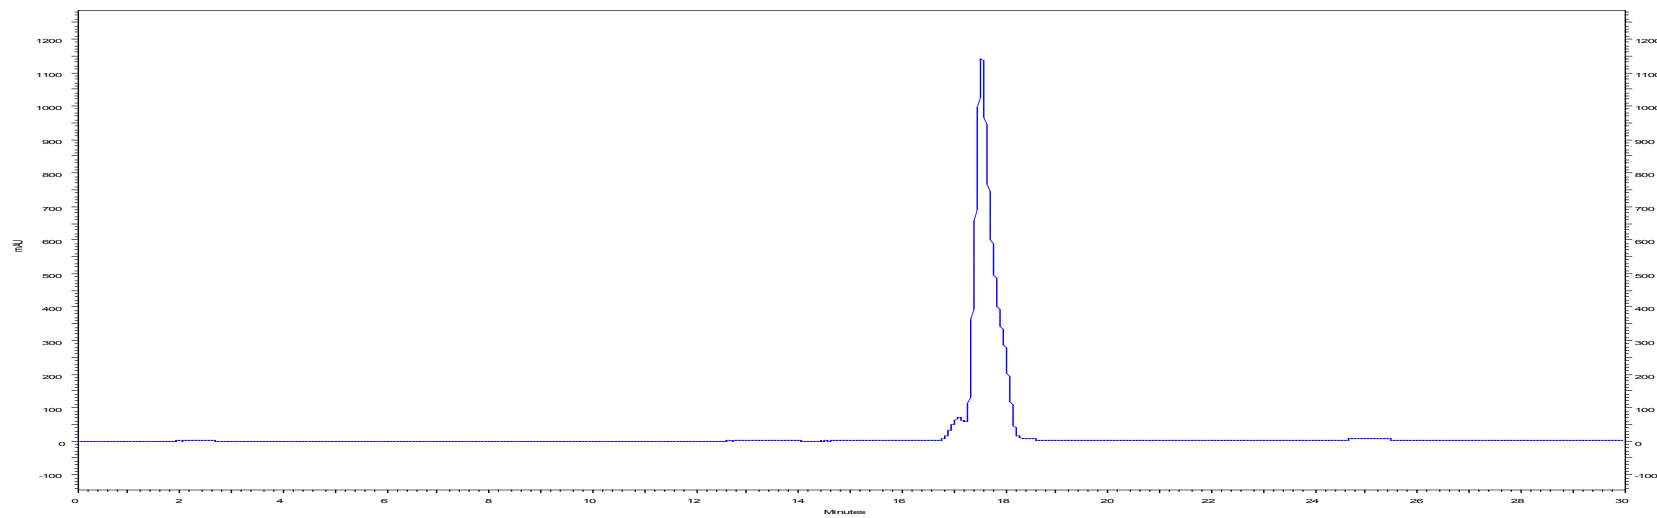

**3. Purification of hTK1 and determination of its concentration**

The hTK1 content in the enzyme preparation was 538.7 µg/mL (Table S2) and was estimated to be ~40% of the purified protein cocktail.

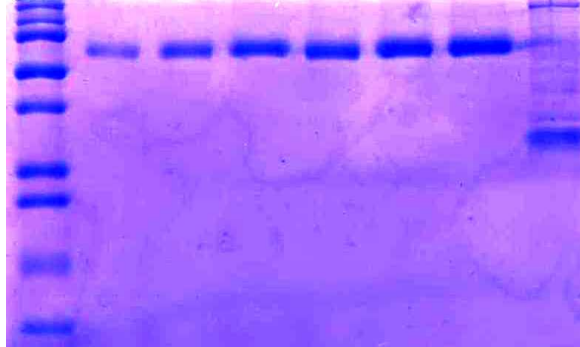

**Figure S1.** SDS gel with known BSA & hTK1

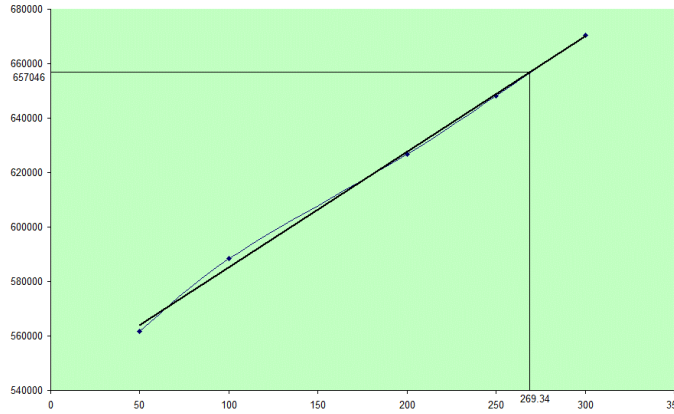

**Figure S2.** Standard curve for spot intensity of known conc. of BSA & hTK1

**Table S2.** Protein concentration calculation.

| Protein type | Protein Conc. (µg/mL) | Integrated Density |
|--------------|-----------------------|--------------------|
| BSA          | 50                    | 561768             |
| BSA          | 100                   | 588345             |
| BSA          | 200                   | 626901             |
| BSA          | 250                   | 648071             |
| BSA          | 300                   | 670455             |
| <b>hTK1</b>  | Unknown               | 657046             |

(50 % solution in glycerol, v/v)

**Equation:**  $Y = 424.65X + 542670$   
**Conc. of hTK1/mL**  $X = 269.34 \mu\text{g/mL}$   
 (50% in Glycerol, v/v)

**Conc. of hTK1**  $X = 538.68 \mu\text{g/mL}$

#### 4. LR-ESI-MS for hTK1 enzyme assay of 7f with $^{31}\text{P}$ -ATP

**Thymidine monophosphate and 3-[2-(*closo*-1,7-Carboranyl)propylcarbamimidoyl]thymidine monophosphate (7f-MP).** LR-ESI-MS found: 323.1  $[\text{M}+\text{H}]^+$  and 549.3  $[\text{M}-\text{PO}_3\text{H}_2 + \text{H}]^+$ , respectively.

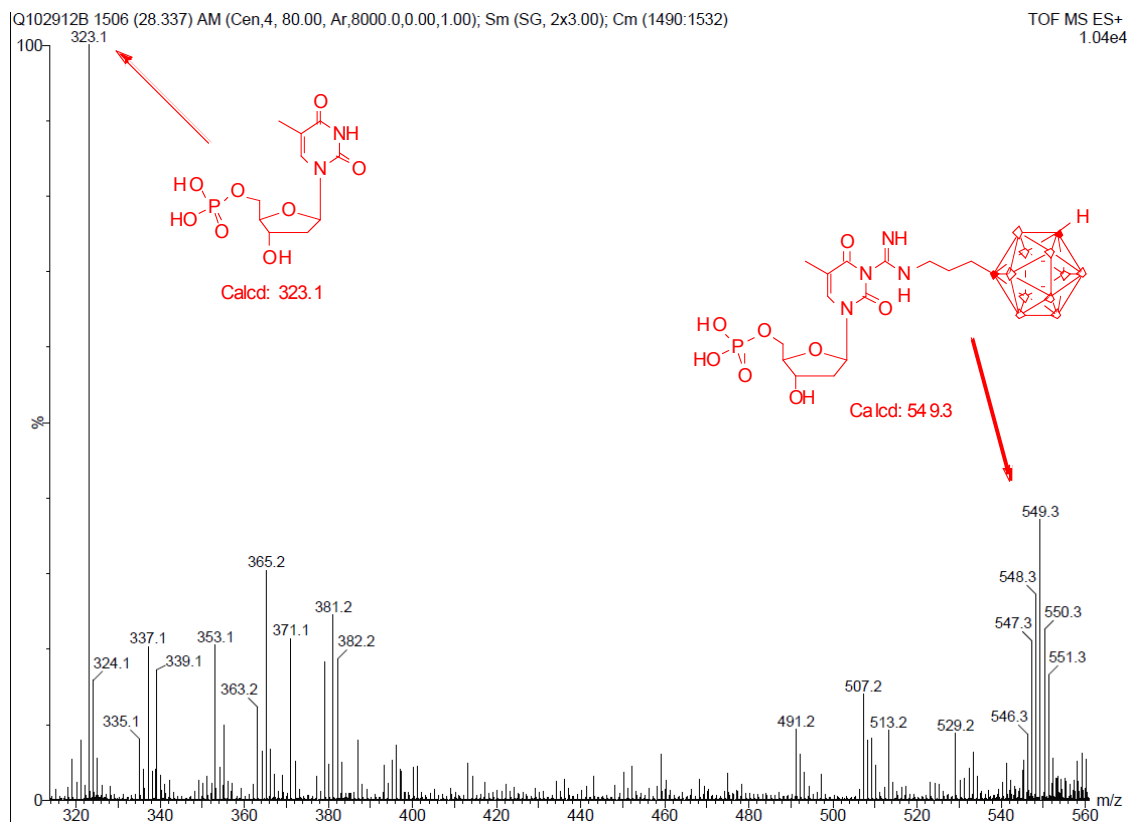

Supplement: NIHMS435610-supplement-01.pdf [file NIHMS435610-supplement-01.pdf]
